1  
2  
3  
4  
5  
6  
7  
8  
9  
10  
11  
12  
13  
14  
15  
16  
17  
18  
19  
20  
21  
22  
23  
24  
25  
26

**Condensin DC spreads linearly and bidirectionally from recruitment sites to create loop-anchored TADs in *C. elegans***

David Sebastian Jimenez<sup>1</sup>, Jun Kim<sup>1</sup>, Bhavana Ragipani<sup>1</sup>, Bo Zhang<sup>2</sup>, Lena Annika Street<sup>1</sup>, Maxwell Kramer<sup>1</sup>, Sarah E Albritton<sup>1</sup>, Lara Winterkorn<sup>1</sup>, Sevinç Ercan<sup>1&</sup>

<sup>1</sup>Department of Biology, Center for Genomics and Systems Biology, New York University, New York, NY 10003

<sup>2</sup>UCSF 513 Parnassus Ave, HSW, San Francisco CA 94143

& Corresponding author  
Sevinç Ercan email: [sevinc@nyu.edu](mailto:sevinc@nyu.edu)

key words: condensin, Hi-C, SMC complex, TAD, 3D organization, insulation, loop extrusion, *C. elegans*, X chromosome, dosage compensation

## 1 Abstract

2  
3 Condensins are molecular motors that compact DNA for chromosome segregation and gene  
4 regulation. *In vitro* experiments have begun to elucidate the mechanics of condensin  
5 function but how condensin loading and translocation along DNA controls eukaryotic  
6 chromosome structure *in vivo* remains poorly understood. To address this question, we  
7 took advantage of a specialized condensin, which organizes the 3D conformation of X  
8 chromosomes to mediate dosage compensation (DC) in *C. elegans*. Condensin DC is  
9 recruited and spreads from a small number of recruitment elements on the X chromosome  
10 (*rex*). We found that ectopic insertion of *rex* sites on an autosome leads to bidirectional  
11 spreading of the complex over hundreds of kilobases. On the X chromosome, strong *rex*  
12 sites contain multiple copies of a 12-bp sequence motif and act as TAD borders. Inserting a  
13 strong *rex* and ectopically recruiting the complex on the X chromosome or an autosome  
14 creates a loop-anchored TAD. Unlike the CTCF system, which controls TAD formation by  
15 cohesin, direction of the 12-bp motif does not control the specificity of loops. In an X;V  
16 fusion chromosome, condensin DC linearly spreads into V and increases 3D DNA contacts,  
17 but fails to form TADs in the absence of *rex* sites. Finally, we provide *in vivo* evidence for  
18 the loop extrusion hypothesis by targeting multiple dCas9-Suntag complexes to an X  
19 chromosome repeat region. Consistent with linear translocation along DNA, condensin DC  
20 accumulates at the block site. Together, our results support a model whereby strong *rex*  
21 sites act as insulation elements through recruitment and bidirectional spreading of  
22 condensin DC molecules and form loop-anchored TADs.

## 24 Introduction

25  
26  
27 Eukaryotic chromosome structure is dynamically regulated across the cell cycle. During  
28 interphase, genomes are organized within the nucleus [1-4] and go through further  
29 compaction for accurate segregation of chromosomes during mitosis and meiosis [5, 6].  
30 Chromosome compaction is mediated in part by DNA looping by a conserved family of  
31 protein complexes called the structural maintenance of chromosomes (SMC) [7]. SMC  
32 complexes include cohesin and condensin, which are essential for genome organization and  
33 segregation [8].

34 The function of cohesin and condensin in various cellular processes are based on their  
35 ability to hold two separate strands of DNA together [9, 10]. These interactions can happen  
36 intramolecularly on the same chromosome or intermolecularly bringing different  
37 chromosomes in close 3D proximity [11]. Intramolecular activity of condensin and cohesin  
38 is important for organizing the 3D contacts between chromosomal sites, forming  
39 topologically associated domains (TADs) that act as genetic neighborhoods within which  
40 genes are regulated [2, 12-16].

41 *In vitro* analysis of condensin and cohesin binding on DNA indicate that they act as ATP  
42 dependent molecular motors forming DNA loops by progressively extruding DNA [17-20].  
43 Loop extrusion hypothesis gained *in vivo* support by *in silico* modeling of loop extrusion

1 activity to explain Hi-C analysis of 3D genome contacts in the presence and absence of  
2 condensin and cohesin [5, 21].

3 The mechanism by which cohesin contributes to formation of TADs is better understood  
4 compared to condensin. Cohesin loading and processivity is promoted by the Adherin  
5 complex (in yeast Scc2-Scc4, in mammals Nipbl & Mau2) [22, 23] and its unloading is  
6 mediated by Wapl [22, 24, 25]. Cohesin translocation on DNA is also controlled by insulator  
7 proteins, including the zinc finger transcription factor CTCF, which creates TAD borders  
8 [26]. The inhibition of cohesin translocation by CTCF is directional, in which two  
9 convergent CTCF binding motifs brought together by DNA looping prevents the passage of  
10 cohesin [27].

11 While *in vitro* and *in silico* experiments suggest similar molecular activities for condensins  
12 and cohesins [7], it is less clear how condensin binding and movement on eukaryotic  
13 chromosomes are regulated *in vivo*. In yeast, TATA box-binding protein (TBP) and TFIIC  
14 recruit condensin to highly transcribed and tRNA gene promoters [28, 29]. However, since  
15 yeast chromosomes support much smaller interaction domains, how condensin binding  
16 regulates larger eukaryotic genomes remains unknown. An excellent model to address this  
17 gap is a specialized condensin that functions within the X chromosome dosage  
18 compensation complex (DCC) in *C. elegans*.

19 In addition to the canonical condensins I and II, *C. elegans* possess condensin I<sup>DC</sup> (hereafter  
20 condensin DC) that differs from the canonical condensins by a single SMC-4 variant DPY-27  
21 [30]. Condensin DC binds to both X chromosomes in hermaphrodites to repress their  
22 transcription by a factor of two, equalizing overall X chromosomal transcripts between XX  
23 hermaphrodites and XO males [31-34]. Several features make condensin DC a powerful  
24 system to address mechanisms of condensin binding and spreading. First, unlike canonical  
25 condensins, the sequence elements important for condensin DC recruitment to the X  
26 chromosomes are identified [35-38]. Second, the spreading of the complex can be  
27 distinguished from recruitment using X to autosome (X;A) fusion chromosomes, where the  
28 complex translocates from the X into the autosome [39]. Third, since the complex only  
29 binds to the X chromosomes, autosomes serve as internal controls, allowing sensitive  
30 measurement using genomics approaches [40-42].

31 Condensin DC recruitment to the X chromosomes is mediated by ~60 recruitment elements  
32 on the X (*rex* sites) [35-37]. The complex is thought to spread from the *rex* sites,  
33 accumulating at enhancers, promoters, and other accessible gene regulatory elements  
34 along the chromosome [41]. Deletion of individual *rex* sites reduces DCC binding ~ 1Mb  
35 around it, indicating that while each *rex* site contributes to condensin DC binding around it,  
36 multiple *rex* sites support robust binding across the ~17 Mb X chromosomes [35].  
37

38 Hi-C analysis in *C. elegans* embryos indicated that eight strong *rex* sites function as TAD  
39 borders [43]. This reflects a subset of approximately 60 *rex* sites and seventeen TAD  
40 borders. Knockdown of SDC-2, the hermaphrodite specific DCC subunit required for  
41 condensin DC recruitment to the X or deletion of the *rex* sequences, eliminated the TAD  
42 borders that overlap with the *rex* sites [43, 44]. A catalytically inactive DPY-21, histone

1 H4K20me2 demethylase that interacts with condensin DC also weakened TAD borders  
2 [45], supporting the idea that condensin DC regulates the 3D organization of the X  
3 chromosomes in *C. elegans*.

4 Here we addressed the mechanism by which *rex* sites and condensin DC form TADs. We  
5 found that inserting three *rex* sites on chromosome II forms a loop anchored TAD-like  
6 domain. Condensin DC spreads bidirectionally from the ectopically inserted *rexes* over long  
7 distance. Supporting the idea that condensin DC recruitment is critical for insulation of  
8 DNA contacts by a *rex* site, spreading of condensin DC to the autosomal region of the X;V  
9 fusion chromosome increased 3D contacts, but failed to form TADs. A majority of the *rex*  
10 sites, including all that act as TAD borders, contain a 12-bp DNA sequence motif present in  
11 multiple copies. Insertion of a motif containing strong *rex* in two opposing orientations lead  
12 to formation of loop-anchored TADs with similar looping contacts, suggesting that motif  
13 orientation is not important for the function of the *rex* sites. To understand how condensin  
14 DC translocates along the chromosome, we targeted a dCas9-Suntag complex to a region of  
15 the X containing repeat DNA. Condensin DC accumulated at the block, supporting the loop  
16 extrusion hypothesis. In summary, our results support a model whereby loop-anchored  
17 TADs on the X are formed by condensin DC mediating 3D DNA contacts through loop  
18 extrusion and strong *rex* sites promoting and insulating these contacts through recruitment  
19 and bidirectional spreading of condensin DC molecules.

20  
21

## 22 **Materials & Methods**

23 All sequencing data are available at Gene Expression Omnibus under GSE168803.

24

### 25 **Strains**

26 Unless otherwise noted, strains were grown on NGM media under standard worm culturing  
27 conditions. N2 wild type, one *rex* insertion ERC06 (knuSi254[SNP400bprex-1, unc-119(+)]  
28 II; unc-119(ed3) III), two *rex* insertion ERC62 (ersIs26[X:11093923-11094322[*rex*-8], II:  
29 8449965); knuSi254[SNP400bprex-1, unc-119(+)] II; unc-119(ed3) III), 3 *rex* insertion  
30 ERC63 (ersIs27[X:11093923-11094322[*rex*-8], II:8371600, II:8449968);  
31 knuSi254[SNP400bprex-1, unc-119(+)] II; unc-119(ed3) III), and 8 *rex* insertion ERC08  
32 (knuIs6[pSE-02(400bprex-1SNP), unc-119(+)] I; unc-119(ed3) III) strains were  
33 previously described [35]. Upstream oriented *rex*-8 insertion strain is ERC69  
34 (ersIs33[X:11093924-11094281[*rex*-8], X:14373128]), downstream oriented insertion  
35 ERC80 (ersIs52[X:11094281-11093924[*rex*-8reverse], X:14373128]). X-V fusion YTP47  
36 (XR-VR) and condensin DC spreading was described in [39]. Primer sequences used in the  
37 generation of the CRISPR strains are included in Supplemental File 1.

38

### 39 **Constructs and transgenes**

40 dCas9-Suntag targeting strain containing the sgRNA is JZ2005 with the genotype  
41 pySi27[Pfib-1:NLS::scFv::sfGFP::NLS::tbb-2 3'UTR /unc-119(+)] I; pySi26[Pfib-  
42 1::NLS::dCas9::24xGCN4::NLS::tbb-2 3'UTR /unc-119(+)] II; unc-119(ed3)/+ III;  
43 pyIs1002(pU6::sgRNA- X227/Punc-122::mCherry), and without the sgRNA is JZ1973

1 (pySi[Pfib-1:NLS:scFv:sfGFP/unc-119(+)] I; pySi[Pfib-1:NLS:dCas9:24xGCN4/unc-119(+)]  
2 II; unc-119(ed3) III).

3  
4 pNLZ10 (Pfib-1::NLS::dCas9::24xGCN4::NLS::tbb-2 3'UTR) construct contains pCFJ150  
5 vector backbone (Addgene plasmid # 19329). *SV40* NLS::dCas9::*egl-13* NLS:: tbb-2 3'UTR  
6 was derived from pJW1231 (Phsp-16.48::NLS::dCas9::EGFP::NLS::tbb-2 3'UTR) (a generous  
7 gift from Dr. Jordan D Ward), which was made by introducing D10A and H840A mutations  
8 into pMB66 (Phsp-16.48:NLS:Cas9:EGFP:NLS:tbb-2 3'UTR)[46]. To produce catalytically  
9 dead Cas9 (dCas9) and then subcloned into pCFJ150 vector. NLS: nuclear localization  
10 signal. A codon-optimized 6.25 copies of GCN4 fragment [47] was synthesized by IDT, and  
11 another 3 multiple GCN4 fragments containing artificial introns were made by PCR  
12 amplification to generate 24 copies of GCN4.

13 pNLZ11 (Pfib-1::NLS::scFv::sfGFP::NLS::tbb-2 3'UTR) construct has the pCFJ210 vector  
14 backbone (Addgene plasmid # 19329). A codon-optimized scFv::sfGFP fragment [47] was  
15 ordered from IDT. *fib-1* promoter was PCR amplified from worm genomic DNA. *tbb-2* 3'UTR  
16 was amplified from pJW1231 (Phsp-16.48::NLS::dCas9::EGFP::NLS::tbb-2 3'UTR). *SV40* and  
17 *egl-13* NLS sequences were added with PCR primers used for amplifying assembly  
18 fragments.

19 pBHC1131 (PU6::sgRNA-X227) construct (a generous gift from Baohui Chen) was derived  
20 from pDD162 (Addgene plasmid #47549) [48] and targets an X chromosome repetitive  
21 region with guide RNA sequence 5'-GGCGCCCATTTAAGGGTA-3'. The sgRNA construct was  
22 modified with optimized sgRNA scaffold (F+E) which can improve the CRISPR imaging  
23 efficiency in human cells [49].

24 Pfib-1::NLS::dCas9::24xGCN4::NLS::tbb-2 3'UTR and Pfib-1::NLS::scFv::sfGFP::NLS::tbb-2  
25 3'UTR were single-copy inserted into worm genome by MosSCI using direct injection  
26 protocol [50]. PU6::sgRNA-X227 was injected at 200 ng/uL concentration with *Punc-*  
27 *122::mCherry* as the co-injection marker to get a transgenic extrachromosomal array line,  
28 which was subsequently integrated into worm genome by TMP-UV method.

### 29 30 **ChIP-seq and mRNA-seq**

31 ChIP-seq and mRNA-seq experiments were performed as previously described [35].  
32 Antibody information and new and published data sets used are given in Supplemental  
33 File1. ChIP-chip data from Ercan et al 2009 was processed by centering average  
34 background enrichment to 0, normalizing to unity and multiplying by a constant to  
35 increase y-axis values. We aligned 50-75bp single-end ChIP-seq reads to *C. elegans* genome  
36 version WS220 using bowtie2 2.3.2 with default parameters [51]. Bam files were then  
37 sorted and indexed using samtools version 2.1.1 [52]. ChIP enrichment was normalized by  
38 dividing to input using DeepTools bamCompare using the following parameters: CPM, bin-  
39 size of 10bp, ignore duplicates, extend reads to 200bp, exclude chrM and remove  
40 blacklisted regions [53]. For analyzing ChIP-seq data across the X chromosomal repeat  
41 block, --very sensitive option was used in bowtie2 and --minMappingQuality was removed  
42 for bamCompare. MACS2 version 2.1.1 was used for fragment size prediction and for peak  
43 calling. For single replicate peak calling a minimum false discovery rate of .05 was used and

1 for merged replicates a minimum false discovery rate of .01 was used. Bedtools intersect  
2 was used to determine overlapping peaks between replicates and only those present in the  
3 majority of the replicates were chosen as final peaks.

4

### 5 **Hi-C**

6 Worms were grown on standard NGM plates and gravid adults were bleached to obtain  
7 embryos, which were crosslinked with 2% formaldehyde and stored at -80C . Frozen  
8 embryos were then resuspended in and crosslinked with 2% formaldehyde in M9 for  
9 another 30 mins. The embryos were spun down at 6000g for 30 sec and washed once with  
10 100mM Tris Cl pH 7.5 and twice with M9. The embryo pellet was resuspended in 1 ml  
11 embryo buffer (110 mM NaCl, 40 mM KCl, 2 mM CaCl<sub>2</sub>, 2 mM MgCl<sub>2</sub>, 25 mM HEPES-KOH  
12 pH 7.5) containing 1 unit chitinase (Sigma), digested approximately 15 minutes,  
13 blastomeres were washed with embryo buffer twice by spinning at 1000g 5 min. The pellet  
14 was resuspended in Nuclei Buffer A (15 mM Tris-HCl pH 7.5, 2 mM MgCl<sub>2</sub>, 0.34 M  
15 Sucrose, 0.15 mM Spermine, 0.5 mM Spermidine, 1 mM DTT, 0.5 mM PMSF (1X Calbiochem  
16 Protease Inhibitor cocktail I), 0.25% NP-40, 0.1% Triton X-100), centrifuged at 1000g for 5  
17 minutes at 4C then resuspended in 1.5 mL Nuclei Buffer A. The embryos were then  
18 dounced 10X with a loose pestle and 10X with a tight pestle. The nuclei were separated  
19 from the cellular debris through spinning down the dounced material at 200G, then  
20 collecting the supernatant containing the nuclei into a separate tube. The pellet was  
21 resuspended in 1.5mL and the douncing process was repeated four times. Each individual  
22 supernatant containing nuclei was checked for quality by DAPI staining and those without  
23 debris were pooled and spun down at 1000G for 10 mins at 4C. Approximately 20 ul nuclei  
24 pellet were used to proceed to Arima Hi-C per the manufacturer's instructions. Library  
25 preparation was performed using the KAPA Hyper Prep Kit using the protocol provided by  
26 Arima. Paired-end Illumina sequencing was performed with Nextseq or Novaseq.

27

28 Paired end Illumina sequence reads were mapped using default parameters of the juicer  
29 pipeline (version=1.5.7) as described in [54]. For insertions and fusion strains, the  
30 reference genome was modified to match the genetic changes. For downstream analysis,  
31 inter\_30.hic outputs from juicer pipeline were converted to h5 file to be used in  
32 HiCEXplorer (version=3.5.1) [55, 56]. Matrices of replicates were combined using  
33 hicSumMatrices. Each replicate or each summed matrix were normalized to match the  
34 depth of the smallest matrix in comparison using hicNormalize with the option --smallest.  
35 The replicate and summed matrices were ICE normalized using hicCorrectMatrix with the  
36 following parameters: --correction\_method ICE, -t 1.7 5, --skipDiagonal, --chromosomes I II  
37 III IV V X or I II III IV XV for X-V fusion.

38

39 The insulation scores were computed using the 10kb-binned normalized matrix function  
40 hicFindTADs with the following parameters: --correctForMultipleTesting fdr, --minDepth  
41 80000, --maxDepth 200000, --step 40000. For 2kb-binned normalized matrix, the following  
42 parameters were used: --correctForMultipleTesting fdr, --minDepth 16000, --maxDepth  
43 40000, --step 8000. Output score.bedgraph was compared between experimental  
44 conditions. The bedgraph file was converted to bigwig using BedgraphToBigwig utility  
45 provided from UCSC website [57].

1  
2  
3  
4  
5  
6  
7  
8  
9

*In silico* 4C plots were generated using the `chicViewpoint` function of `hicexplorer` with the following parameters: `--averageContactBin 3 --range 20000000 20000000`. The plotted values indicate relative contact scores out of 1000. The background model for `chicViewpoint` was generated using the summed wildtype matrix using the `chicViewpointBackgroundModel` function.

## Results

10 *Condensin DC spreads bidirectionally from ectopically inserted rex sequences on autosomes*  
11 In previous work, we showed that insertion of a single *rex* to autosomes fails to recruit  
12 condensin DC, but insertion of additional *rexes* at a distance of ~30-50kb increases  
13 condensin DC binding as measured by ChIP-qPCR [35]. Others have shown that insertion of  
14 3 *rex* sites 1.4Mb apart over a 2.8Mb region onto autosomes failed to establish a TAD  
15 border [44]. We reasoned that failure to do so might have been the failure of these sites to  
16 cooperate over Mb distances to recruit enough condensin DC. Thus, we revisited the  
17 question of if *rex* sites can form TAD borders and sought to test if and how *rex* insertions  
18 that are capable of recruiting condensin DC as measured by qChIP are able to create  
19 condensin DC bound TADs.

20  
21  
22  
23  
24  
25  
26  
27  
28  
29

We analyzed condensin DC binding by performing DPY-27 ChIP-seq in two strains [35]. The first strain was generated by serial insertion of one *rex-1* (intermediate strength *rex*) and two *rex-8* (strong *rex*) on chromosome II by MosSci and CRISPR, respectively. The three *rex* sites exist within a ~80Kb stretch of DNA. The sequential insertion of *rex* sites generated intermediate strains containing one or two *rex* sites, allowing us to observe the cooperative condensin DC recruitment to the same genomic region. The second strain was generated via integration of an extrachromosomal array of a plasmid containing *rex-1* in eight copies on chromosome I.

30 First, we analyzed how condensin DC spread from the inserted *rex* elements on chr II and  
31 chr I (Figure 1A). Upon single *rex-1* insertion on chromosome II, the ChIP-seq profile did  
32 not differ much from no insertion. Upon insertion of the second *rex* approximately 30Kb  
33 downstream of the first, condensin DC binding increased surrounding the insertions. The  
34 strain harboring three *rex* sites supported higher condensin DC binding, with peaks  
35 enriched at promoters, similar to that of the X chromosome (Figure 1A, bottom panel).  
36 DPY-27 ChIP-seq enrichment was elevated ~200kb surrounding the insertions while peaks  
37 unique to the three-*rex* strain extended to ~1 Mb region around the ~80kb insertion site,  
38 indicating that condensin DC is capable of spreading bidirectionally over long distances  
39 from the inserted *rex* sites.

40  
41  
42  
43  
44

The spreading from the 8-*rex* insertion on chromosome I was also similar (Figure 1B). In both cases, the level of binding around the ectopic *rex* insertions was less than on the X (Supplemental Figure 1A) suggesting that presence of multiple *rex* sites confers robust condensin DC binding on the X (Figure 1C). In summary, analysis of condensin DC binding

1 upon ectopic *rex* insertion indicates that spreading of condensin DC from the *rex* sites is  
2 bidirectional.

3

#### 4 *Condensin DC binding effects on domain-level gene repression*

5 Robust recruitment of condensin DC on the X chromosomes results in chromosome-wide  
6 repression of transcription by a factor of  $\sim 2$  [32-34]. Supporting the idea that condensin  
7 DC binding represses transcription, on X-A fusion chromosomes, condensin DC spreading  
8 into the autosome leads to gene repression in a manner proportional to condensin DC  
9 binding [41]. We performed mRNA-seq in the *rex* insertion strains and observed that genes  
10 were not consistently and individually repressed based on local DCC binding (Figure 2D).  
11 However, when expression changes are analyzed at the domain level within 200 or 500 kb  
12 bins, repression was more apparent.

13

14 In the 3-*rex* strain, gene expression within the bin containing the *rex* insertions showed a  
15 downward trend but this was not statistically significant (Supplemental Figure 1B). In the  
16 8-*rex* strain, the 500 kb bin containing the *rex* insertions was significantly repressed  
17 relative to the rest of chromosome I (Supplemental Figure 1B). It is notable that qChIP  
18 analysis had shown higher recruitment by the 8-*rex* compared to the 3-*rex* insertion [35].  
19 Lastly, chromosome-wide expression showed a downward trend for the chromosome  
20 harboring the *rex* insertion, but the effect sizes were small (Figure 1E). Overall, expression  
21 analyses support the idea that condensin DC creates repressive domains whose effect size  
22 is proportional to the level of condensin DC binding at these domains.

23

#### 24 *Ectopic rex insertions on chromosome II form a loop-anchored TAD*

25 To test if *rex* sites that recruit condensin DC can form TAD borders on autosomes, we  
26 performed Hi-C analysis in the 3-*rex* strain, where the two inserted *rex* sites are *rex-8*, which  
27 acts as a TAD border on the X [44]. We found that the two distal *rex-8* insertions spaced  
28 approximately 80Kb apart had an increase in interaction frequency suggesting that these  
29 two sites are forming a loop where previously there was no interaction in this region of  
30 chromosome II in wildtype animals (Figure 2A). The interaction between the weaker *rex-1*  
31 and the strong *rex-8* sites is harder to assess by Hi-C since this site is close to each *rex-8*  
32 (Figure 2B). To further analyze *rex-1* interactions, we used *in silico* 4C with each inserted  
33 *rex* as a bait. We found that relative to the wild type, all 3 *rex* insertion sites interacted with  
34 each other (Figure 2C). Additionally, there was a reduction in insulation score at the  
35 insertion sites, indicating increased insulation of 3D contacts across the ectopic *rex* sites.  
36 These results are consistent with the hypothesis that TAD insulation activity of *rex* sites  
37 requires condensin DC recruitment, and that *rex* sites that recruit condensin are sufficient  
38 to form loop-anchored TADs on autosomes.

39

#### 40 *Inserting rex-8 in two different orientations leads to similar 3D looping interactions with the 41 surrounding rex sites*

42 The fact that strong *rex* sequences containing the 12-bp DNA motif form TAD boundaries  
43 lead us to test if they act analogously to CTCF sites in mammals. CTCF motif orientation is  
44 important for TAD border establishment [58-60]. To address if *rex* sites are analogous to  
45 CTCF binding sites, we generated two strains in which a single copy of *rex-8* was inserted  
46 on the X chromosome at the same location in two directions (Figure 3A). *Rex-8* was shown



1 to be sufficient for TAD establishment on the X [43, 44] and contains four motifs within a  
2 200 bp sequence all in the same orientation. Condensin DC binding patterns across the X  
3 were similar between the two insertion strains (Figure 3B) and DPY-27 ChIP-seq  
4 enrichment indicated that the two insertions recruited similar levels of condensin DC  
5 relative to the other *rexes* (Figure 3C).

6  
7 We performed Hi-C and compared the resulting matrices between wildtype and both  
8 insertion strains. In both orientations, the inserted *rex-8* sequence was able to establish a  
9 novel TAD border and loop with the neighboring *rexes* (Figure 3A), thus motif orientation  
10 does not control specificity of *rex* interactions. Insulation scores across the insertion site  
11 were consistently lower in the replicates of data from both insertion strains (Supplemental  
12 Figure 3), thus the inserted *rex-8* similarly regulates 3D DNA contacts regardless of its  
13 orientation. These results indicate that strong *rex* sites act as insulators regardless of motif  
14 orientation.

#### 15 *TAD formation requires condensin DC recruitment by the rex sequences*

16 Next, we asked if condensin DC binding or *rex* sequences are responsible for the  
17 establishment of TADs on the X. To address this question, we performed Hi-C in a strain  
18 containing X;V fusion chromosomes, where condensin DC spreads ~3 Mb into V but no new  
19 recruitment sites are generated [39]. 3D DNA contacts were increased across the fusion  
20 site, which is expected for the chromatin polymer (Figure 4A). Consistent with the idea that  
21 condensin DC binding increases long-range 3D contacts, the autosomal spreading region  
22 showed an increase in DNA contacts measured by Hi-C (Figure 4B). There were no new  
23 dips in the insulation score along the region of spreading (Figure 4A). These results suggest  
24 that condensin DC binding increases chromatin contacts, but recruitment by *rex* sequences  
25 are needed for insulation to create TAD borders.

26  
27  
28 Off note, the replicates of Hi-C in the X;V strain were performed using different crosslinking  
29 conditions. In Figure 4, the experiment was performed using live-crosslinked embryos  
30 stored frozen, followed by a second crosslink before carrying out Hi-C. In supplemental  
31 Figure 4, the experiment was performed using single live crosslinking. The background  
32 interactions in the Hi-C are lower when double cross linking is used (Supplemental File 1).  
33 Nevertheless, the main results from the replicates concurred. There were no new TAD  
34 borders while 3D contacts at the autosomal region increased in the X;V fusion  
35 (Supplemental Figure 4). Thus, condensin DC binding increases 3D contacts, but in the  
36 absence of recruitment by a *rex* site, no new loop-anchored TADs are created.

#### 37 *Condensin DC accumulates at a dCas9 generated block on the X chromosome*

38 While it is clear that condensin DC spreads linearly along the chromosome [39], it is not  
39 clear if the molecular mechanism by which condensin DC spreads is through loop  
40 extrusion. To address this question, we wondered if a large block on the chromatin fiber  
41 possibly extruding from the diameter of ~40 nM of condensin ring could prevent condensin  
42 DC translocation along chromatin. The rationale was based on *in vitro* work showing that  
43 linear translocation of cohesin can be blocked using a dCas9-mediated protein obstacle  
44 [61].  
45  
46

1 To address if linear spreading of condensin DC can be blocked, we utilized a dCas9 based  
2 system in which dCas9-Sun tag and binding proteins are expressed in presence of an sgRNA  
3 targeting a repetitive region of the X chromosome (Figure 5A). The relative size of each  
4 individual protein complex (dCas9-Suntag + Pfib-1:NLS:scFv-GFP ) is approximately  
5 1400kDa and is predicted to be larger than the ~20nm blocks used for *in vitro* experiments  
6 [61]. In addition to the size of the block being large enough to block spreading, we utilized a  
7 repetitive region as the target so that multiple blocking complexes could be recruited to a  
8 relatively small genomic locus. We confirmed that dCas9 was targeted to the repeat region  
9 in the presence of the sgRNA using ChIP-seq (Figure 5B). Strikingly, dCas9 targeting this  
10 region increased condensin DC binding, supporting the idea that the large dCas9-Suntag  
11 complex acts as a block to condensin DC translocation along DNA (Figure 5B).

12  
13 To evaluate if 3D genome organization was affected by the block, we performed Hi-C and  
14 saw that the genome architecture was largely unaltered (Figure 5B). DPY-27 and GFP ChIP-  
15 seq profiles are plotted under the Hi-C to indicate the site of the dCas9-Suntag-scFv-GFP  
16 block. There was a slight increase in Hi-C insulation at the block site, but the repeat region  
17 already has some insulation activity in the wild type. It is possible that blocking condensin  
18 DC is not sufficient for insulation and *rex* sequences are required. Nevertheless, our results  
19 support the idea that a physical protein block of sufficient size is capable of affecting  
20 condensin DC's linear translocation, thus providing *in vivo* evidence for loop extrusion  
21 hypothesis for a metazoan condensin.

22  
23

## 24 Discussion

25 The current model of condensin DC binding to the X chromosomes involves a two-step  
26 mechanism of recruitment and spreading [31]. X-specific recruitment is accomplished by  
27 ~64 *rex* sites, the majority of which include multiple copies of a 12-bp sequence motif,  
28 required for their function [35-38]. It is not clear what protein binds directly to these  
29 motifs, but other DCC subunits, including SDC-1, SDC-2 and DPY-30 are required condensin  
30 DC recruitment to the X chromosome [31, 62]. Work in other condensins and bacterial SMC  
31 complexes points to a similar mechanism in regard to DNA binding: recruitment or the  
32 initial nucleation through interactions with proteins bound at specific sites followed by  
33 linear spreading along DNA [63-65]. Here, X-specificity of condensin DC binding and ability  
34 to engineer recruitment elements in the genome allowed us to address how a metazoan  
35 condensin's recruitment and spreading regulates 3D organization of chromosomes.

36

37 *How does the recruitment sites establish condensin DC binding domains?*

38 On the X chromosome, deletion of a single *rex* site reduced condensin DC binding over ~1  
39 Mb domain by about ~20-40%, suggesting that multiple recruitment sites contribute  
40 condensin DC across long distances to establish robust condensin DC binding across the X  
41 chromosome [35]. In agreement with this conclusion, we found that insertion of *rex*  
42 elements on autosomes create large domains of condensin DC binding (Figure 1). The fact  
43 that binding surrounds the *rex* insertions indicates that condensin DC can spread from the  
44 recruitment elements in either direction and over distances exceeding hundreds of  
45 kilobases. Since insertion of one or two *rex* sites did not noticeably increase condensin DC  
46 binding, establishing a condensin DC binding domain does not linearly correlate with the

1 number of *rex* sites, but requires passing a threshold due to cooperative nature of the  
2 recruitment and/or spreading.

3

4 *What is the molecular mechanism of condensin DC spreading from the rex sites?*

5 Our results support the loop extrusion hypothesis, where a dCas9-Suntag-scFv-GFP  
6 complex blocked the translocation of condensin DC along DNA (Figure 5). Processivity of  
7 the complex could determine the rate of reduction in binding away from the *rex* sites, as  
8 seen in the ectopic insertion experiments here and in X:A fusion chromosomes [39, 41]. In  
9 X:A fusion chromosomes, condensin DC spreads over 1-3 Mb distances covering hundreds  
10 of active genes and the ~1Mb ribosomal DNA repeats on chr X;I [39]. Thus, the process of  
11 loop extrusion should at some rate overcome large blocks. This is supported by the  
12 observation that cohesin complexes were capable of traversing a strong block albeit at a  
13 lower frequency [66]. One possibility is that condensin DC loop extrusion is a combination  
14 of continuous and discontinuous movement along the chromosome.

15

16 Bidirectional spreading from the recruitment sites using a loop extrusion mechanism may  
17 be a conserved feature of condensin activity, as *in silico* modeling found bidirectionality as  
18 an important feature to support proper mitotic chromosome compaction [67] and *in vitro*  
19 analysis showed bidirectional movement of mammalian condensins [18, 20]. In *B. subtilis*,  
20 the SMC complex is loaded by ParB to ParS sites and spreads to the arms of the bacterial  
21 chromosome in a bidirectional manner, juxtaposing the two arms together [68, 69]. A  
22 closer look at the *rex* sites in the Hi-C data does not reveal a similar “hairpin” structure  
23 (Figure 2,3). Instead, it is possible that condensin DC can enter and start moving in either  
24 direction from the *rex* sites. The lack of strong stripes from the *rex* sites suggests that there  
25 is high heterogeneity of DNA loops formed after movement from the *rex* sites in embryos.

26

27 *How do rex sites create loop-anchored TADs?*

28 Previous work showed that a subset of strong *rex* sites creates loop-anchored TADs [43,  
29 44]. Here, we showed that condensin DC binding in itself does not create TAD borders but  
30 requires *rex* sites (Figure 4). How do strong *rex* sites create TAD borders? A single *rex*  
31 insertion on an autosome, which is expected to not recruit enough condensin DC, is  
32 incapable of forming a TAD border [44]. While three *rex* insertions on chromosome II  
33 recruited condensin DC and showed insulation activity (Figure 2). We previously noted  
34 that strong *rex* sites reduce condensin DC spreading [35]. Thus, we propose that the *rex*  
35 sites’ insulation activity is based on the condensin DC molecules inability to pass over  
36 others being loaded and moving out from the *rex* sites. Such a clash between condensins  
37 have been suggested for the *B. subtilis* SMC complex, and may be a conserved feature of  
38 condensins [70, 71].

39

40 Alternatively, presence of large protein complexes at the *rex* sites may slow down or reduce  
41 the passage of condensin DC. Inducible loading of the bacterial SMCs followed by ChIP-seq  
42 and Hi-C analysis measured the speed of complex movement on DNA in the order of  
43 hundreds to a kilobase per second [68, 72], which is in a similar range as *in vitro* speed of  
44 loop extrusion by eukaryotic condensins [18-20, 73]. Notably, bacterial SMC complex speed  
45 *in vivo* reduces through a head on conflict with transcription [68, 72, 74]. Condensin DC  
46 accumulation at promoters suggest that similar factors may be in play in *C. elegans* [36, 41].

1  
2 In a third possibility, specific proteins bound at the *rex* sites may physically interact to  
3 block condensin DC [75-80]. In *Caenorhabditis*, a CTCF ortholog is not present [81],  
4 however, SDC-2 transcription factor and two zinc finger containing proteins, SDC-3 and  
5 SDC-1, and DPY-30 a subunit of the COMPASS complex are required for the recruitment of  
6 condensin DC to the X [31]. CTCF binding in a convergent orientation regulates its protein  
7 interaction domains that prevent cohesin translocation [79, 82-85]. Since 12-bp motif  
8 orientation does not influence the specificity of the inserted *rex* sites making loops with  
9 surrounding *rex* sites (Figure 3), it is possible that the responsible protein(s) act as non-  
10 CTCF insulators like Zelda or share similar insulating properties and may facilitate TAD  
11 establishment such as YY1, which do not require a specific motif orientation [86-89].  
12  
13

14 *How do rex sites that are more than Mb distance away form loops?*

15 It is possible that condensin DC loop extrusion from one *rex* to the other form a loop or that  
16 other proteins mediate the long-range interactions between *rexes*. The catalytic mutation  
17 in the H4K20me2 demethylase DPY-21, which is part of the DCC reduces looping between  
18 *rex* sites [45]. Thus, a combination of both models is possible, where initial proximity of the  
19 *rexes* created by condensin DC loop extrusion could be reinforced by condensin DC  
20 molecules that can hold the two *rex* sites, similar to how yeast condensin mediates  
21 interaction between tRNA genes on different chromosomes [90].  
22

23 It is not clear if there is a function for looping between *rex* sites. Deletion of eight strong *rex*  
24 sites eliminated the specific loops on the X, yet did not affect dosage compensation [44].  
25 However, it remains unknown if looping provides some robustness to the system by  
26 putting *rex* sites together in close proximity to increase local concentration of the complex,  
27 which may be more important during the establishment of dosage compensation in early  
28 embryogenesis or its maintenance as chromatin features are challenged upon stress or  
29 during aging.  
30

31  
32 *C. elegans* dosage compensation system co-opting a condensin complex required the  
33 evolution of X-specific condensin recruitment sites, opening a window into how eukaryotic  
34 condensins enter and move along chromosomes *in vivo*. Here our work supports a model in  
35 which condensin DC is loaded at and spreads bidirectionally from the *rex* sites  
36 translocating along chromatin over hundreds of kilobase distances (Figure 6). Insulator  
37 proteins that bind to the strong *rex* sites or clash of incoming condensin DC molecules with  
38 those coming off the *rex* sites, create loop-anchored TAD borders. It is not clear if and how  
39 condensin-DC mediated 3D structure of the chromosome contributes to transcription  
40 repression. Future work addressing this question will reveal more insights into the  
41 function of condensin-mediated genome organization.  
42  
43

44 **Figure Legends**  
45

1 Figure 1 *Condensin DC spreads over hundreds of kb distance bidirectionally from ectopically*  
2 *inserted rex sequences* A) DPY-27 ChIP-seq/input ratio data comparing wild-type average  
3 with a single intermediate *rex-1* insertion (grey) on chromosome II, a subsequent strong  
4 *rex-8* insertion (pink) 30 Kb downstream from *rex-1* and a second copy of *rex-8* inserted 50  
5 Kb upstream from *rex-1*. Schematic depicting the *rex* site insertions on chromosome II are  
6 shown next to each respective strain's ChIP-seq/input data track. In the bottom panel, a  
7 100 Kb window centered around the insertion site for chromosome II is shown. Gene  
8 tracks are displayed below. B) Schematic depicting the inserted array containing 8 copies  
9 of *rex-1* on chromosome I. DPY-27 ChIP-seq/input ratio data comparing wild-type and  
10 insertion strain is shown within a 2 Mb window centered around the estimated insertion  
11 region. C) Violin plots showing condensin DC binding measured by DPY-27 ChIP-seq/input  
12 for the 3 *rex* insertion strain and the 8 *rex* insertion strain. ChIP-seq/input scores at peaks  
13 within a 200 Kb window surrounding the insertion sites were plotted and compared to  
14 condensin DC binding at peaks on the X chromosome for both strains. D) mRNA-seq data  
15 comparing the 3-*rex* insertion strains to wildtype is shown. The points indicate log<sub>2</sub> fold  
16 change between the insertion and wildtype for each gene. Grey shading underneath the  
17 points indicate gene bodies and the *rex* insertions are annotated. The displayed window is  
18 a 100Kb region centered around the central insertion for the 3 *rex* insertion strain and a  
19 50Kb region centered around the insertion for the 8 *rex* insertion strain. E) Boxplots of the  
20 log<sub>2</sub> fold change in the 3-*rex* (left panel) and 8-*rex* strains(right panel). Autosomes III, IV &  
21 V are binned together, chromosomes I & X are shown as controls. Two-tailed student's t-  
22 test p-values are given.

23  
24 Supplemental Figure 1 *Condensin DC binding at the ectopic autosomal spreading regions are*  
25 *lower than that of the X and lead to a slight reduction in domain-wide gene expression* A)  
26 DPY-27 ChIP-seq/input ratio data comparing wild-type average with a single intermediate  
27 *rex-1* insertion (grey) on chromosome II, a subsequent strong *rex-8* insertion (pink) 30 Kb  
28 downstream from *rex-1* and a second copy of *rex-8* inserted 50 Kb upstream from *rex-1*.  
29 Schematic depicting the *rex* site insertions on chromosome II are shown next to each  
30 respective strain's ChIP-seq/input data track. The 2 Mb window centered around the  
31 central insertion site and a similar region on the X chromosome are shown for comparison.  
32 DPY-27 binding peaks are shown below. B) log<sub>2</sub> fold change ratios were averaged for genes  
33 within 200 Kb bins (top panels) and 500 Kb bins (bottom panels) tiled across chromosome  
34 II in the 3 *rex* and chromosome I in 8 *rex* insertion strains. Bins containing a significant  
35 level of repression are marked with asterisks (Fisher exact test p-value <.05 = \*, p-value  
36 <.01 = \*\*, p-value <.001 = \*\*\*) and red bins indicate bins that contain an inserted *rex* site.

37  
38  
39 Figure 2 *Inserted rex sites on chr II create loops and increase insulation of 3D DNA*  
40 *interactions* A) Heatmaps of Hi-C data binned at 2-kb resolution showing chromatin  
41 interaction frequencies for chromosome II in wildtype embryos (left panel) and in the 3-*rex*  
42 insertion strain (right panel). The red circle indicates a novel looping event. The arrows  
43 indicate increased insulation. B) The insulation scores for wild type and 3-*rex* harboring  
44 strain are shown in grey and red respectively. C) Hi-C data was used to generate *in silico*  
45 4C-seq tracks for wildtype or 3-*rex* insertion strain embryos.

46

1  
2 **Figure 3** *Insertion of rex-8, which contains multiple 12-bp motifs in two opposite orientations*  
3 *form similar 3D DNA loops with surrounding rex sites* A) Rex sites and the orientation of the  
4 motifs surrounding the region in which *rex-8* is inserted in the 3' to 5' orientation or the 5'  
5 to 3' orientation. Dark arrows indicate high scoring 12-bp motifs [35](Albritton et al.,  
6 2017). Heatmaps of Hi-C data binned at 10-kb resolution showing chromatin interaction  
7 frequencies for chromosome X in wildtype embryos (left panel) 5' to 3' insertion harboring  
8 embryos (middle panel) and 3' to 5' insertion harboring embryos (right panel). DPY-27  
9 ChIP-seq/input ratio and insulation scores are plotted for each strain. B) DPY-27 ChIP-  
10 seq/input ratio is shown for a comparable region on the X chromosome. C) Average DPY-27  
11 ChIP-seq/input ratio was calculated for adjacent 150 bp windows around the 200 bp  
12 summit of each *rex* site. The level of DPY-27 binding at the ectopic *rex-8* (red) and other  
13 *rexes* are plotted against each other for comparing condensin DC recruitment in the two  
14 strains.

15  
16 **Supplemental Figure 3** *Insertion of rex-8, which contains multiple 12-bp motifs in two*  
17 *opposite orientations both show insulation effect at the insertion site but does not affect*  
18 *insulation elsewhere on the X*. Insulation scores of individual replicates are shown for the  
19 entire X chromosome in wild type and two *rex-8* insertion strains.

20  
21  
22 **Figure 4** *Condensin DC binding increases 3D contacts but does not create new TADs in the*  
23 *absence of rex sites in autosomal spreading domain in the X;V fusion chromosomes* A)  
24 Heatmaps of Hi-C data binned at 50-kb resolution showing chromatin interaction  
25 frequencies for chromosome X and chromosome V. Wild type karyotype data is shown  
26 above the diagonal and fusion data is shown below the diagonal. Insulation scores are  
27 plotted below the heatmaps for wild type and X;V karyotypes in gray and green  
28 respectively. The *rex* sites are annotated and published DPY-27 ChIP-chip data are plotted.  
29 B)  $P(s,XV)/P(s,WT)$ , fold change in Hi-C contact probability at various regions in the  
30 genome. While X;V-fusion did not form TADs, relative to the arms of other chromosomes,  
31 the fusion regions show increased interactions <300kb relative to interactions >300kb.

32  
33 **Supplemental Figure 4** *Hi-C data from single formaldehyde crosslink*. A) Heatmaps of Hi-C  
34 data binned at 50-kb resolution showing chromatin interaction frequencies for  
35 chromosome X and chromosome V. Wild type karyotype data is shown above the diagonal  
36 and fusion data is shown below the diagonal. Insulation scores are plotted below the  
37 heatmaps for wild type and X;V karyotypes in gray and green respectively. The *rex* sites are  
38 annotated and published DPY-27 ChIP-chip enrichment scores were normalized to unity  
39 and plotted. B)  $P(s,XV)/P(s,WT)$ , fold change in Hi-C contact probability at various regions  
40 in the genome. While X;V-fusion did not form TADs, relative to the arms of other  
41 chromosomes, the fusion regions show increased interactions <300kb relative to  
42 interactions >300kb.

43  
44  
45 **Figure 5** *Targeting dCas9 to a repeat region on the X chromosome leads to accumulation of*  
46 *condensin DC at the block site* A) Schematic depicting the multi-protein block and the

1 approximate size of the components utilized to prevent condensin from translocating  
2 linearly along chromatin. B) Zoomed in view of the 20kb region surrounding the target  
3 sites is shown. CHIP-seq of DPY-27 in the absence and presence of sgRNA targeting the  
4 repeat regions, and CHIP-seq of GFP targeting ScFv-dCas9 complex are shown. To visualize  
5 binding at the repetitive region, for this panel only, the reads were processed with less  
6 stringent parameters as detailed in methods. C) Heatmaps of Hi-C data binned at 50-kb  
7 resolution showing chromatin interaction frequencies for chromosome X in wildtype  
8 embryos (top heatmap) and in the block harboring strain (bottom heatmap). Insulation  
9 score and the nearby *rexes* are indicated. In the bottom panel, DPY-27 CHIP-seq/input  
10 ratios are plotted in a strain possessing the blocking components without an sgRNA (top  
11 track) and with the sgRNA (bottom track). The location of the block is annotated below the  
12 CHIP-seq data, and also marked by the GFP CHIP-seq against ScFv-dCas9 complex.

13

14

15 *Figure 6 A model for condensin DC recruitment, spreading and regulation of 3D organization*  
16 *of the chromosome* Our results support a model whereby *rex* sites serve as both condensin  
17 DC loading sites and as TAD borders. Loop extruding condensin DC molecules may clash  
18 with others that are loading and bidirectionally spreading from the *rex* sites. Orientation of  
19 the 12-bp motifs at the *rex* sites do not control the specificity of looping interactions and  
20 insulation activity. In summary, condensin DC mediated 3D DNA contacts combined with  
21 the insulation activity of the *rex* sites form the loop-anchored TADs on the X chromosomes.

22

23

#### 24 **Acknowledgements**

25 SE and research in this manuscript was supported by the National Institute of General  
26 Medical Sciences of the National Institutes of Health under award numbers R01 GM107293  
27 and R35 GM130311. DJ was supported in part by NIGMS Predoctoral Fellowship  
28 T32HD007520. We thank Dr. Noelle L'etoile, who generously supported Bo Zhang's  
29 postdoctoral work that included dCas9 targeting, with grants NIBIB R33 EB019784 and  
30 NIDCD R01 DC005991. We thank Jordan Ward and Baohui Chen for plasmids. We thank  
31 Gencore at the NYU Center for Genomics and Systems Biology. We also thank Shaun  
32 Mahony, Lila Rieber, Pedro Rocha, Ramya Raviram and Jane Skok who helped with  
33 experimental trials prior to adopting Hi-C, and Arima genomics for technical support.

34

35

#### 36 **Competing interests**

37 None

38

## References

1. Kumar, Y., D. Sengupta, and W. Bickmore, *Recent advances in the spatial organization of the mammalian genome*. J Biosci, 2020. **45**.
2. Rowley, M.J. and V.G. Corces, *Organizational principles of 3D genome architecture*. Nat Rev Genet, 2018. **19**(12): p. 789-800.
3. Stam, M., M. Tark-Dame, and P. Fransz, *3D genome organization: a role for phase separation and loop extrusion?* Curr Opin Plant Biol, 2019. **48**: p. 36-46.
4. Szalaj, P. and D. Plewczynski, *Three-dimensional organization and dynamics of the genome*. Cell Biol Toxicol, 2018. **34**(5): p. 381-404.
5. Gibcus, J.H., et al., *A pathway for mitotic chromosome formation*. Science, 2018. **359**(6376).
6. Naumova, N., et al., *Organization of the mitotic chromosome*. Science, 2013. **342**(6161): p. 948-53.
7. van Ruiten, M.S. and B.D. Rowland, *SMC Complexes: Universal DNA Looping Machines with Distinct Regulators*. Trends Genet, 2018. **34**(6): p. 477-487.
8. Wood, A.J., A.F. Severson, and B.J. Meyer, *Condensin and cohesin complexity: the expanding repertoire of functions*. Nat Rev Genet, 2010. **11**(6): p. 391-404.
9. Cuylen, S., J. Metz, and C.H. Haering, *Condensin structures chromosomal DNA through topological links*. Nat Struct Mol Biol, 2011. **18**(8): p. 894-901.
10. Minamino, M., et al., *Topological in vitro loading of the budding yeast cohesin ring onto DNA*. Life Sci Alliance, 2018. **1**(5).
11. Paul, M.R., A. Hochwagen, and S. Ercan, *Condensin action and compaction*. Curr Genet, 2019. **65**(2): p. 407-415.
12. Chang, L.H., S. Ghosh, and D. Noordermeer, *TADs and Their Borders: Free Movement or Building a Wall?* J Mol Biol, 2020. **432**(3): p. 643-652.
13. Dekker, J. and E. Heard, *Structural and functional diversity of Topologically Associating Domains*. FEBS Lett, 2015. **589**(20 Pt A): p. 2877-84.
14. Hansen, A.S., et al., *Recent evidence that TADs and chromatin loops are dynamic structures*. Nucleus, 2018. **9**(1): p. 20-32.
15. Kaiser, V.B. and C.A. Semple, *When TADs go bad: chromatin structure and nuclear organisation in human disease*. F1000Res, 2017. **6**.
16. Lupianez, D.G., M. Spielmann, and S. Mundlos, *Breaking TADs: How Alterations of Chromatin Domains Result in Disease*. Trends Genet, 2016. **32**(4): p. 225-237.
17. Camdere, G.O., K.K. Carlborg, and D. Koshland, *Intermediate step of cohesin's ATPase cycle allows cohesin to entrap DNA*. Proc Natl Acad Sci U S A, 2018. **115**(39): p. 9732-9737.
18. Kong, M., et al., *Human Condensin I and II Drive Extensive ATP-Dependent Compaction of Nucleosome-Bound DNA*. Mol Cell, 2020. **79**(1): p. 99-114 e9.
19. Ganji, M., et al., *Real-time imaging of DNA loop extrusion by condensin*. Science, 2018. **360**(6384): p. 102-105.
20. Terakawa, T., et al., *The condensin complex is a mechanochemical motor that translocates along DNA*. Science, 2017. **358**(6363): p. 672-676.
21. Nuebler, J., et al., *Chromatin organization by an interplay of loop extrusion and compartmental segregation*. Proc Natl Acad Sci U S A, 2018. **115**(29): p. E6697-E6706.



- 1 22. Gassler, J., et al., *A mechanism of cohesin-dependent loop extrusion organizes zygotic*
- 2 *genome architecture*. EMBO J, 2017. **36**(24): p. 3600-3618.
- 3 23. Kim, Y., et al., *Human cohesin compacts DNA by loop extrusion*. Science, 2019.
- 4 **366**(6471): p. 1345-1349.
- 5 24. Haarhuis, J.H.I., et al., *The Cohesin Release Factor WAPL Restricts Chromatin Loop*
- 6 *Extension*. Cell, 2017. **169**(4): p. 693-707 e14.
- 7 25. Peters, J.M. and T. Nishiyama, *Sister chromatid cohesion*. Cold Spring Harb Perspect
- 8 Biol, 2012. **4**(11).
- 9 26. Nora, E.P., et al., *Targeted Degradation of CTCF Decouples Local Insulation of*
- 10 *Chromosome Domains from Genomic Compartmentalization*. Cell, 2017. **169**(5): p. 930-
- 11 944 e22.
- 12 27. Rao, S.S., et al., *A 3D map of the human genome at kilobase resolution reveals principles*
- 13 *of chromatin looping*. Cell, 2014. **159**(7): p. 1665-80.
- 14 28. D'Ambrosio, C., et al., *Identification of cis-acting sites for condensin loading onto*
- 15 *budding yeast chromosomes*. Genes Dev, 2008. **22**(16): p. 2215-27.
- 16 29. Iwasaki, O., et al., *Interaction between TBP and Condensin Drives the Organization and*
- 17 *Faithful Segregation of Mitotic Chromosomes*. Mol Cell, 2015. **59**(5): p. 755-67.
- 18 30. Csankovszki, G., et al., *Three distinct condensin complexes control C. elegans*
- 19 *chromosome dynamics*. Curr Biol, 2009. **19**(1): p. 9-19.
- 20 31. Albritton, S.E. and S. Ercan, *Caenorhabditis elegans Dosage Compensation: Insights*
- 21 *into Condensin-Mediated Gene Regulation*. Trends Genet, 2018. **34**(1): p. 41-53.
- 22 32. Kramer, M., P. Rao, and S. Ercan, *Untangling the Contributions of Sex-Specific Gene*
- 23 *Regulation and X-Chromosome Dosage to Sex-Biased Gene Expression in*
- 24 *Caenorhabditis elegans*. Genetics, 2016. **204**(1): p. 355-69.
- 25 33. Kramer, M., et al., *Developmental Dynamics of X-Chromosome Dosage Compensation*
- 26 *by the DCC and H4K20me1 in C. elegans*. PLoS Genet, 2015. **11**(12): p. e1005698.
- 27 34. Kruesi, W.S., et al., *Condensin controls recruitment of RNA polymerase II to achieve*
- 28 *nematode X-chromosome dosage compensation*. Elife, 2013. **2**: p. e00808.
- 29 35. Albritton, S.E., et al., *Cooperation between a hierarchical set of recruitment sites targets*
- 30 *the X chromosome for dosage compensation*. Elife, 2017. **6**.
- 31 36. Ercan, S., et al., *X chromosome repression by localization of the C. elegans dosage*
- 32 *compensation machinery to sites of transcription initiation*. Nat Genet, 2007. **39**(3): p.
- 33 403-8.
- 34 37. Jans, J., et al., *A condensin-like dosage compensation complex acts at a distance to*
- 35 *control expression throughout the genome*. Genes Dev, 2009. **23**(5): p. 602-18.
- 36 38. McDonel, P., et al., *Clustered DNA motifs mark X chromosomes for repression by a*
- 37 *dosage compensation complex*. Nature, 2006. **444**(7119): p. 614-8.
- 38 39. Ercan, S., L.L. Dick, and J.D. Lieb, *The C. elegans dosage compensation complex*
- 39 *propagates dynamically and independently of X chromosome sequence*. Curr Biol, 2009.
- 40 **19**(21): p. 1777-87.
- 41 40. Ercan, S. and J.D. Lieb, *C. elegans dosage compensation: a window into mechanisms of*
- 42 *domain-scale gene regulation*. Chromosome Res, 2009. **17**(2): p. 215-27.
- 43 41. Street, L.A., et al., *Binding of an X-Specific Condensin Correlates with a Reduction in*
- 44 *Active Histone Modifications at Gene Regulatory Elements*. Genetics, 2019. **212**(3): p.
- 45 729-742.

- 1 42. Vielle, A., et al., *H4K20me1 contributes to downregulation of X-linked genes for C.*  
2 *elegans dosage compensation.* PLoS Genet, 2012. **8**(9): p. e1002933.
- 3 43. Crane, E., et al., *Condensin-driven remodelling of X chromosome topology during dosage*  
4 *compensation.* Nature, 2015. **523**(7559): p. 240-4.
- 5 44. Anderson, E.C., et al., *X Chromosome Domain Architecture Regulates Caenorhabditis*  
6 *elegans Lifespan but Not Dosage Compensation.* Dev Cell, 2019. **51**(2): p. 192-207 e6.
- 7 45. Brejc, K., et al., *Dynamic Control of X Chromosome Conformation and Repression by a*  
8 *Histone H4K20 Demethylase.* Cell, 2017. **171**(1): p. 85-102 e23.
- 9 46. Waaijers, S., et al., *CRISPR/Cas9-targeted mutagenesis in Caenorhabditis elegans.*  
10 *Genetics*, 2013. **195**(3): p. 1187-91.
- 11 47. Tanenbaum, M.E., et al., *A protein-tagging system for signal amplification in gene*  
12 *expression and fluorescence imaging.* Cell, 2014. **159**(3): p. 635-46.
- 13 48. Dickinson, D.J., et al., *Engineering the Caenorhabditis elegans genome using Cas9-*  
14 *triggered homologous recombination.* Nat Methods, 2013. **10**(10): p. 1028-34.
- 15 49. Chen, B., et al., *Dynamic imaging of genomic loci in living human cells by an optimized*  
16 *CRISPR/Cas system.* Cell, 2013. **155**(7): p. 1479-91.
- 17 50. Frokjaer-Jensen, C., et al., *Single-copy insertion of transgenes in Caenorhabditis elegans.*  
18 *Nat Genet*, 2008. **40**(11): p. 1375-83.
- 19 51. Langmead, B. and S.L. Salzberg, *Fast gapped-read alignment with Bowtie 2.* Nat  
20 *Methods*, 2012. **9**(4): p. 357-9.
- 21 52. Ramirez-Gonzalez, R.H., et al., *Bio-samtools: Ruby bindings for SAMtools, a library for*  
22 *accessing BAM files containing high-throughput sequence alignments.* Source Code Biol  
23 *Med*, 2012. **7**(1): p. 6.
- 24 53. Ho, J.W., et al., *Comparative analysis of metazoan chromatin organization.* Nature,  
25 2014. **512**(7515): p. 449-52.
- 26 54. Durand, N.C., et al., *Juicer Provides a One-Click System for Analyzing Loop-Resolution*  
27 *Hi-C Experiments.* Cell Syst, 2016. **3**(1): p. 95-8.
- 28 55. Wolff, J., et al., *Galaxy HiCEXplorer: a web server for reproducible Hi-C data analysis,*  
29 *quality control and visualization.* Nucleic Acids Res, 2018. **46**(W1): p. W11-W16.
- 30 56. Ramirez, F., et al., *High-resolution TADs reveal DNA sequences underlying genome*  
31 *organization in flies.* Nat Commun, 2018. **9**(1): p. 189.
- 32 57. Kent, W.J., et al., *BigWig and BigBed: enabling browsing of large distributed datasets.*  
33 *Bioinformatics*, 2010. **26**(17): p. 2204-7.
- 34 58. Nanni, L., S. Ceri, and C. Logie, *Spatial patterns of CTCF sites define the anatomy of*  
35 *TADs and their boundaries.* Genome Biol, 2020. **21**(1): p. 197.
- 36 59. Nichols, M.H. and V.G. Corces, *A CTCF Code for 3D Genome Architecture.* Cell, 2015.  
37 **162**(4): p. 703-5.
- 38 60. Nishana, M., et al., *Defining the relative and combined contribution of CTCF and*  
39 *CTCF-L to genomic regulation.* Genome Biol, 2020. **21**(1): p. 108.
- 40 61. Stigler, J., et al., *Single-Molecule Imaging Reveals a Collapsed Conformational State for*  
41 *DNA-Bound Cohesin.* Cell Rep, 2016. **15**(5): p. 988-998.
- 42 62. Meyer, B.J., *Sex and death: from cell fate specification to dynamic control of X-*  
43 *chromosome structure and gene expression.* Mol Biol Cell, 2018. **29**(22): p. 2616-2621.
- 44 63. Csankovszki, G., P. McDonel, and B.J. Meyer, *Recruitment and spreading of the C.*  
45 *elegans dosage compensation complex along X chromosomes.* Science, 2004. **303**(5661):  
46 p. 1182-5.

- 1 64. Li, Y., et al., *Structural basis for Scc3-dependent cohesin recruitment to chromatin*. Elife,  
2 2018. **7**.
- 3 65. Wang, X., et al., *Bacillus subtilis SMC complexes juxtapose chromosome arms as they*  
4 *travel from origin to terminus*. Science, 2017. **355**(6324): p. 524-527.
- 5 66. Dequeker, B.J.H., et al., *MCM complexes are barriers that restrict cohesin-mediated loop*  
6 *extrusion*. bioRxiv, 2020: p. 2020.10.15.340356.
- 7 67. Banigan, E.J., et al., *Chromosome organization by one-sided and two-sided loop*  
8 *extrusion*. Elife, 2020. **9**.
- 9 68. Wang, X., et al., *In Vivo Evidence for ATPase-Dependent DNA Translocation by the*  
10 *Bacillus subtilis SMC Condensin Complex*. Mol Cell, 2018. **71**(5): p. 841-847 e5.
- 11 69. Wang, X., et al., *Condensin promotes the juxtaposition of DNA flanking its loading site in*  
12 *Bacillus subtilis*. Genes Dev, 2015. **29**(15): p. 1661-75.
- 13 70. Anchimiuk, A., et al., *Fine-tuning of the Smc flux facilitates chromosome organization in*  
14 *<em>B. subtilis</em>*. bioRxiv, 2020: p. 2020.12.04.411900.
- 15 71. Brandão, H.B., et al., *DNA-loop extruding SMC complexes can traverse one another*  
16 *<em>in vivo</em>*. bioRxiv, 2020: p. 2020.10.26.356329.
- 17 72. Tran, N.T., M.T. Laub, and T.B.K. Le, *SMC Progressively Aligns Chromosomal Arms in*  
18 *Caulobacter crescentus but Is Antagonized by Convergent Transcription*. Cell Rep, 2017.  
19 **20**(9): p. 2057-2071.
- 20 73. Strick, T.R., T. Kawaguchi, and T. Hirano, *Real-time detection of single-molecule DNA*  
21 *compaction by condensin I*. Curr Biol, 2004. **14**(10): p. 874-80.
- 22 74. Brandão, H.B., et al., *RNA polymerases as moving barriers to condensin loop extrusion*.  
23 Proceedings of the National Academy of Sciences, 2019. **116**(41): p. 20489-20499.
- 24 75. Hu, G., et al., *Systematic screening of CTCF binding partners identifies that BHLHE40*  
25 *regulates CTCF genome-wide distribution and long-range chromatin interactions*.  
26 Nucleic Acids Res, 2020. **48**(17): p. 9606-9620.
- 27 76. Justice, M., et al., *A WIZ/Cohesin/CTCF Complex Anchors DNA Loops to Define Gene*  
28 *Expression and Cell Identity*. Cell Rep, 2020. **31**(2): p. 107503.
- 29 77. Lehman, B.J., et al., *Dynamic regulation of CTCF stability and sub-nuclear localization*  
30 *in response to stress*. PLoS Genet, 2021. **17**(1): p. e1009277.
- 31 78. Valletta, M., et al., *Exploring the Interaction between the SWI/SNF Chromatin*  
32 *Remodeling Complex and the Zinc Finger Factor CTCF*. Int J Mol Sci, 2020. **21**(23).
- 33 79. van Ruiten, M.S. and B.D. Rowland, *On the choreography of genome folding: A grand*  
34 *pas de deux of cohesin and CTCF*. Curr Opin Cell Biol, 2021. **70**: p. 84-90.
- 35 80. Xiao, T., X. Li, and G. Felsenfeld, *The Myc-associated zinc finger protein (MAZ) works*  
36 *together with CTCF to control cohesin positioning and genome organization*. Proc Natl  
37 Acad Sci U S A, 2021. **118**(7).
- 38 81. Heger, P., B. Marin, and E. Schierenberg, *Loss of the insulator protein CTCF during*  
39 *nematode evolution*. BMC Mol Biol, 2009. **10**: p. 84.
- 40 82. Debaugny, R.E. and J.A. Skok, *CTCF and CTCFL in cancer*. Curr Opin Genet Dev,  
41 2020. **61**: p. 44-52.
- 42 83. Hansen, A.S., *CTCF as a boundary factor for cohesin-mediated loop extrusion: evidence*  
43 *for a multi-step mechanism*. Nucleus, 2020. **11**(1): p. 132-148.
- 44 84. Pugacheva, E.M., et al., *CTCF mediates chromatin looping via N-terminal domain-*  
45 *dependent cohesin retention*. Proc Natl Acad Sci U S A, 2020. **117**(4): p. 2020-2031.

- 1 85. Xiang, J.F. and V.G. Corces, *Regulation of 3D chromatin organization by CTCF*. *Curr*  
2 *Opin Genet Dev*, 2020. **67**: p. 33-40.
- 3 86. Hug, C.B., et al., *Chromatin Architecture Emerges during Zygotic Genome Activation*  
4 *Independent of Transcription*. *Cell*, 2017. **169**(2): p. 216-228 e19.
- 5 87. Li, M., et al., *Architectural proteins for the formation and maintenance of the 3D*  
6 *genome*. *Sci China Life Sci*, 2020. **63**(6): p. 795-810.
- 7 88. Lyu, X., M.J. Rowley, and V.G. Corces, *Architectural Proteins and Pluripotency Factors*  
8 *Cooperate to Orchestrate the Transcriptional Response of hESCs to Temperature Stress*.  
9 *Mol Cell*, 2018. **71**(6): p. 940-955 e7.
- 10 89. Weintraub, A.S., et al., *YY1 Is a Structural Regulator of Enhancer-Promoter Loops*. *Cell*,  
11 2017. **171**(7): p. 1573-1588 e28.
- 12 90. Paul, M.R., et al., *Condensin Depletion Causes Genome Decompaction Without Altering*  
13 *the Level of Global Gene Expression in Saccharomyces cerevisiae*. *Genetics*, 2018.  
14 **210**(1): p. 331-344.  
15

## Figure 1

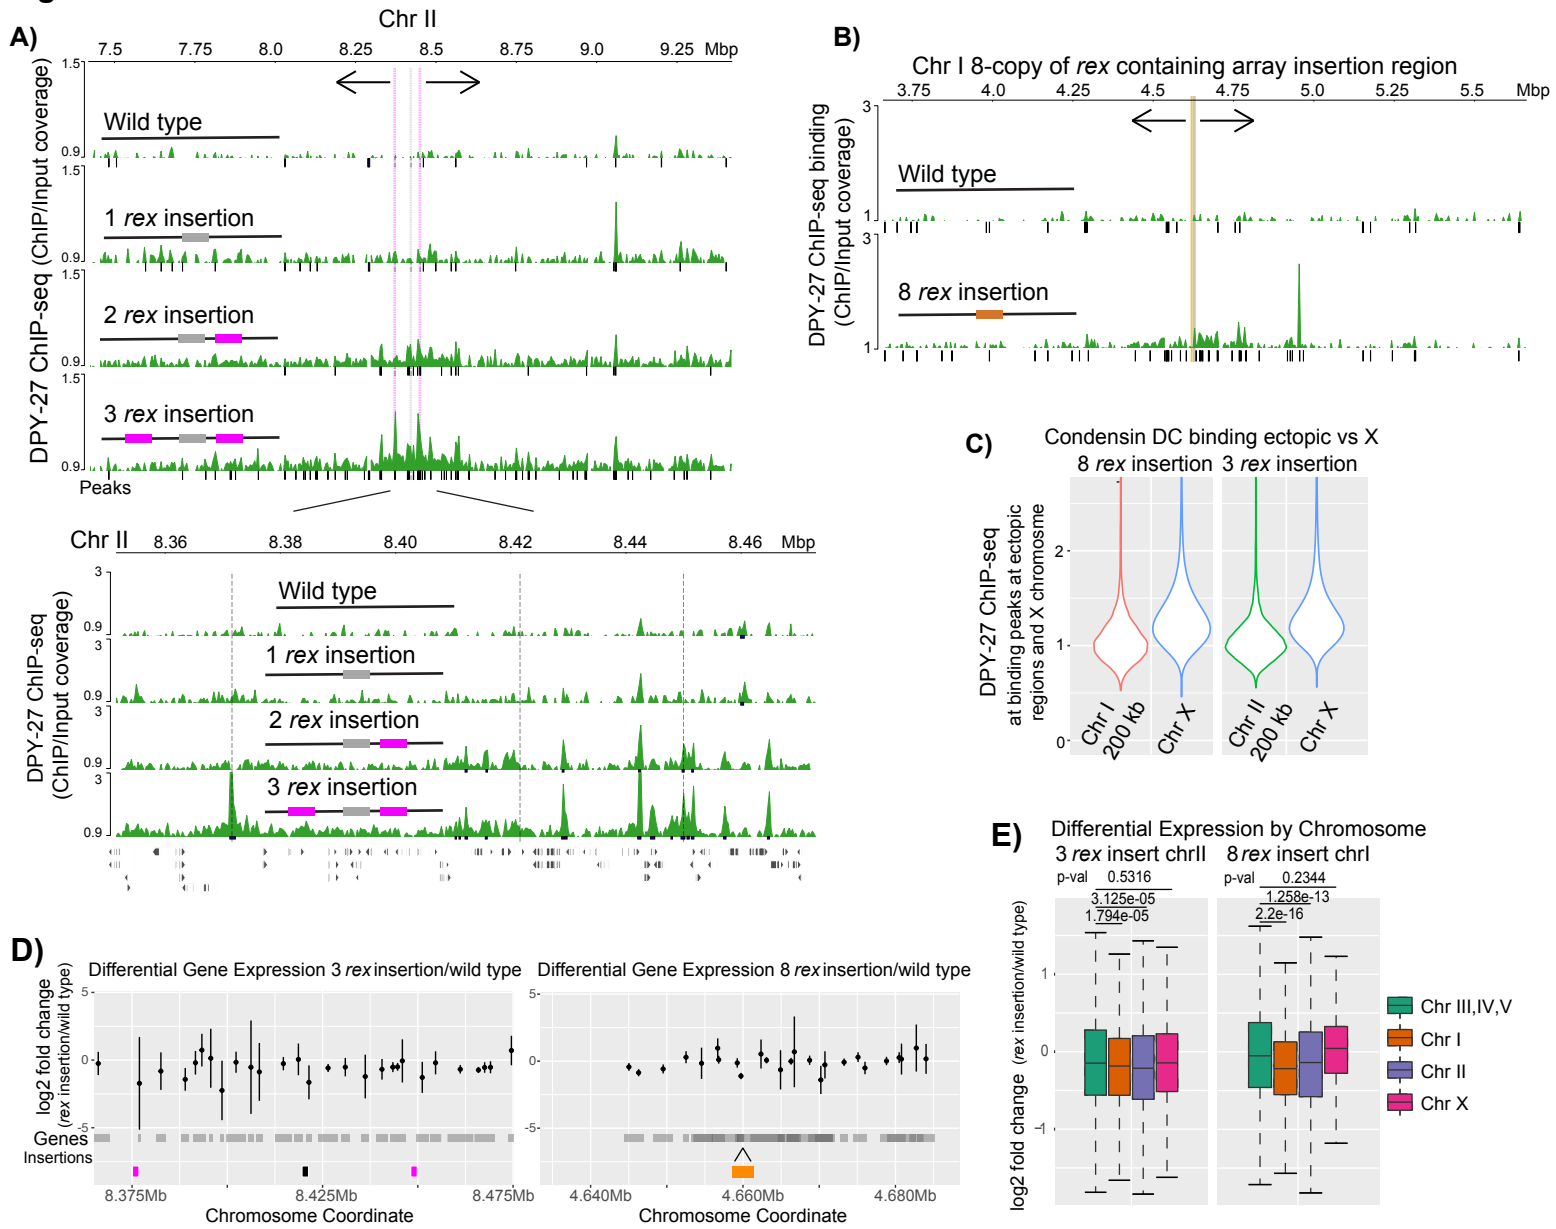

**Figure 1 Supplement**

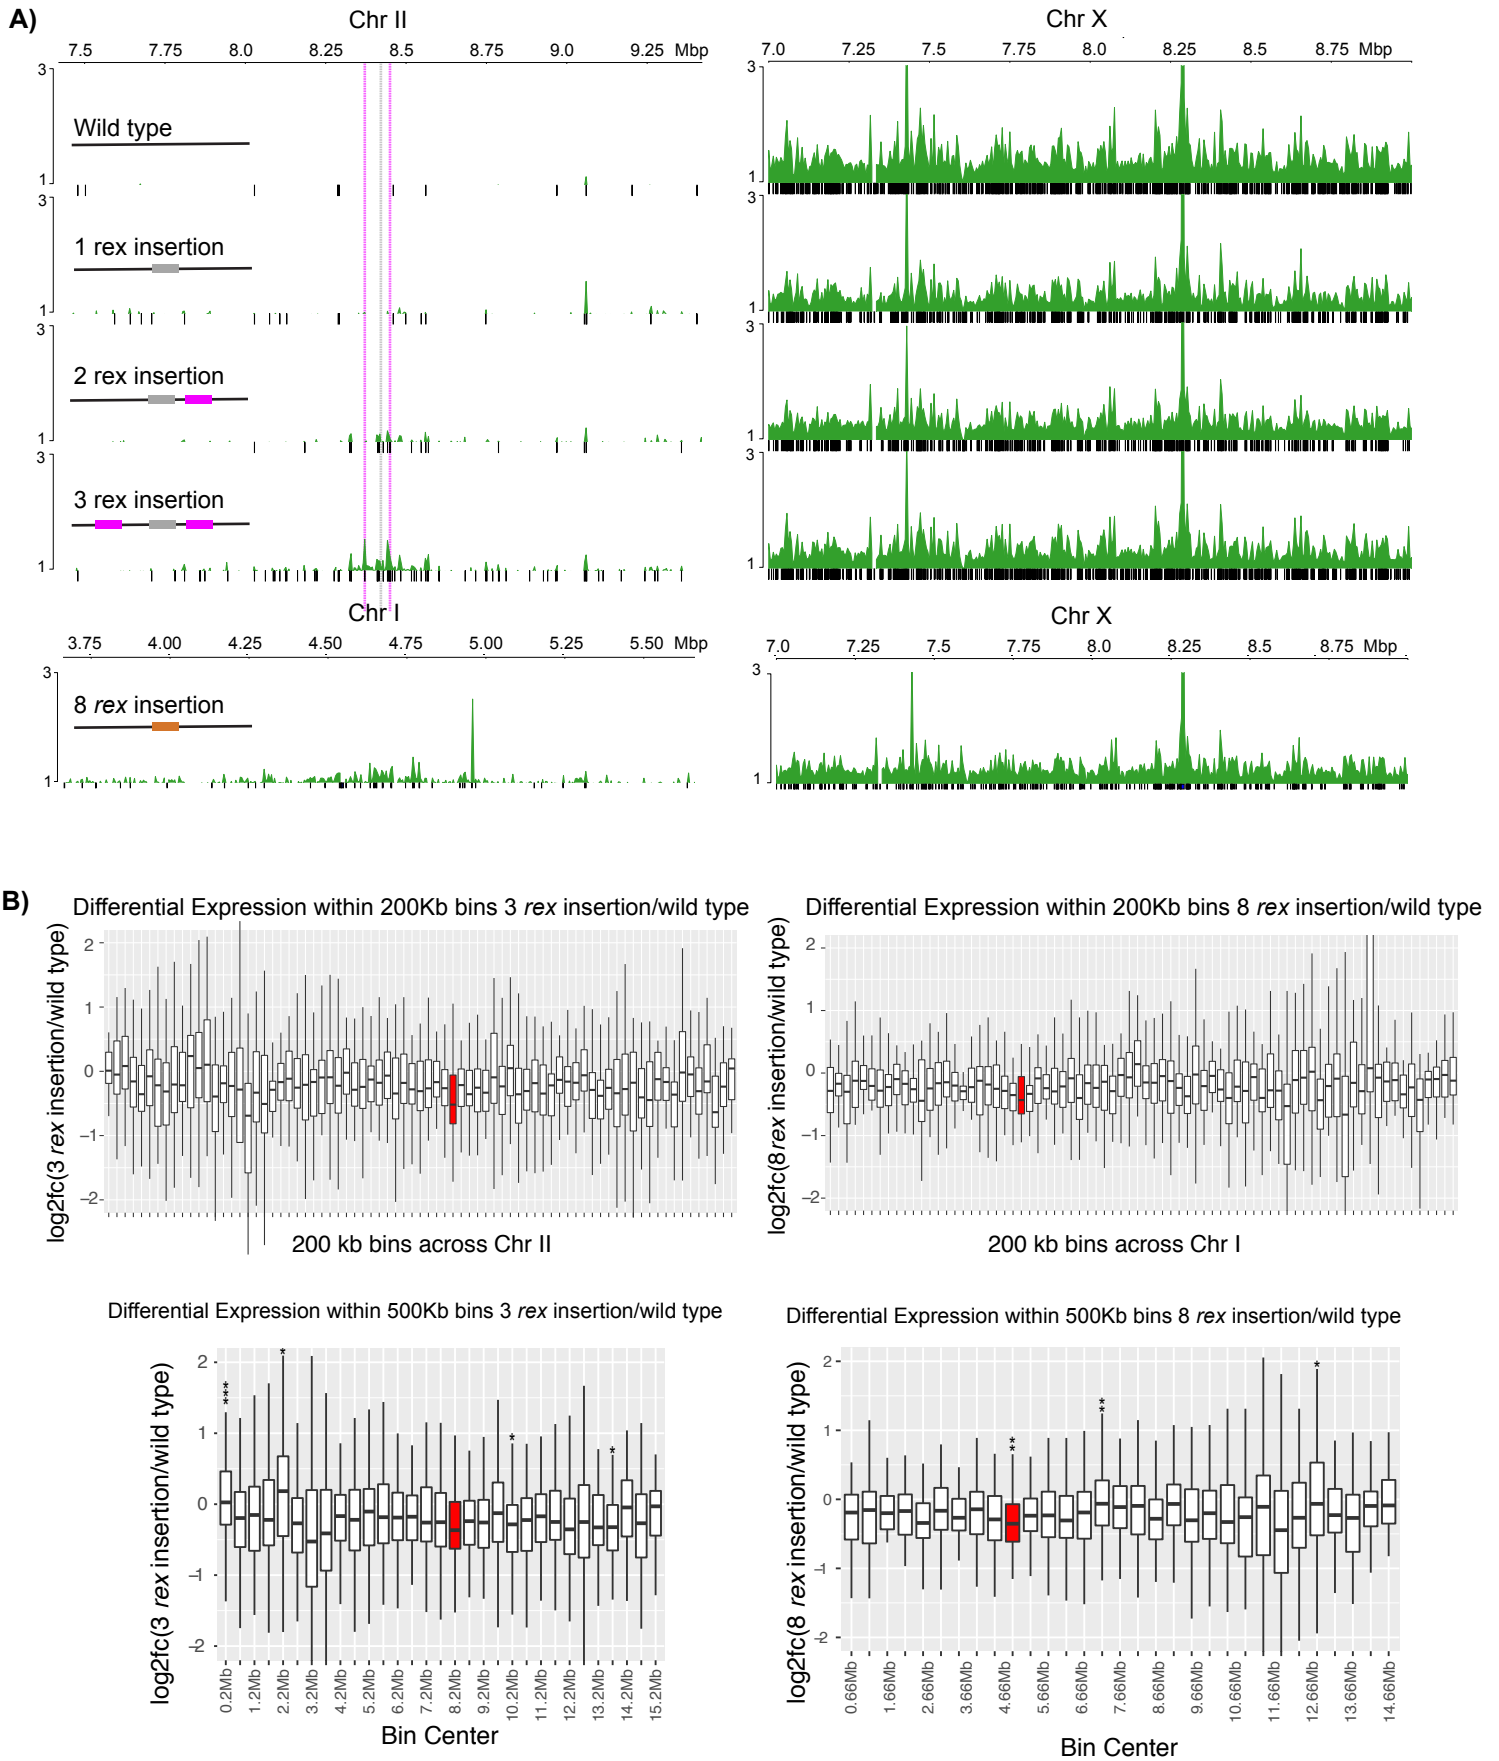

**Figure 2**

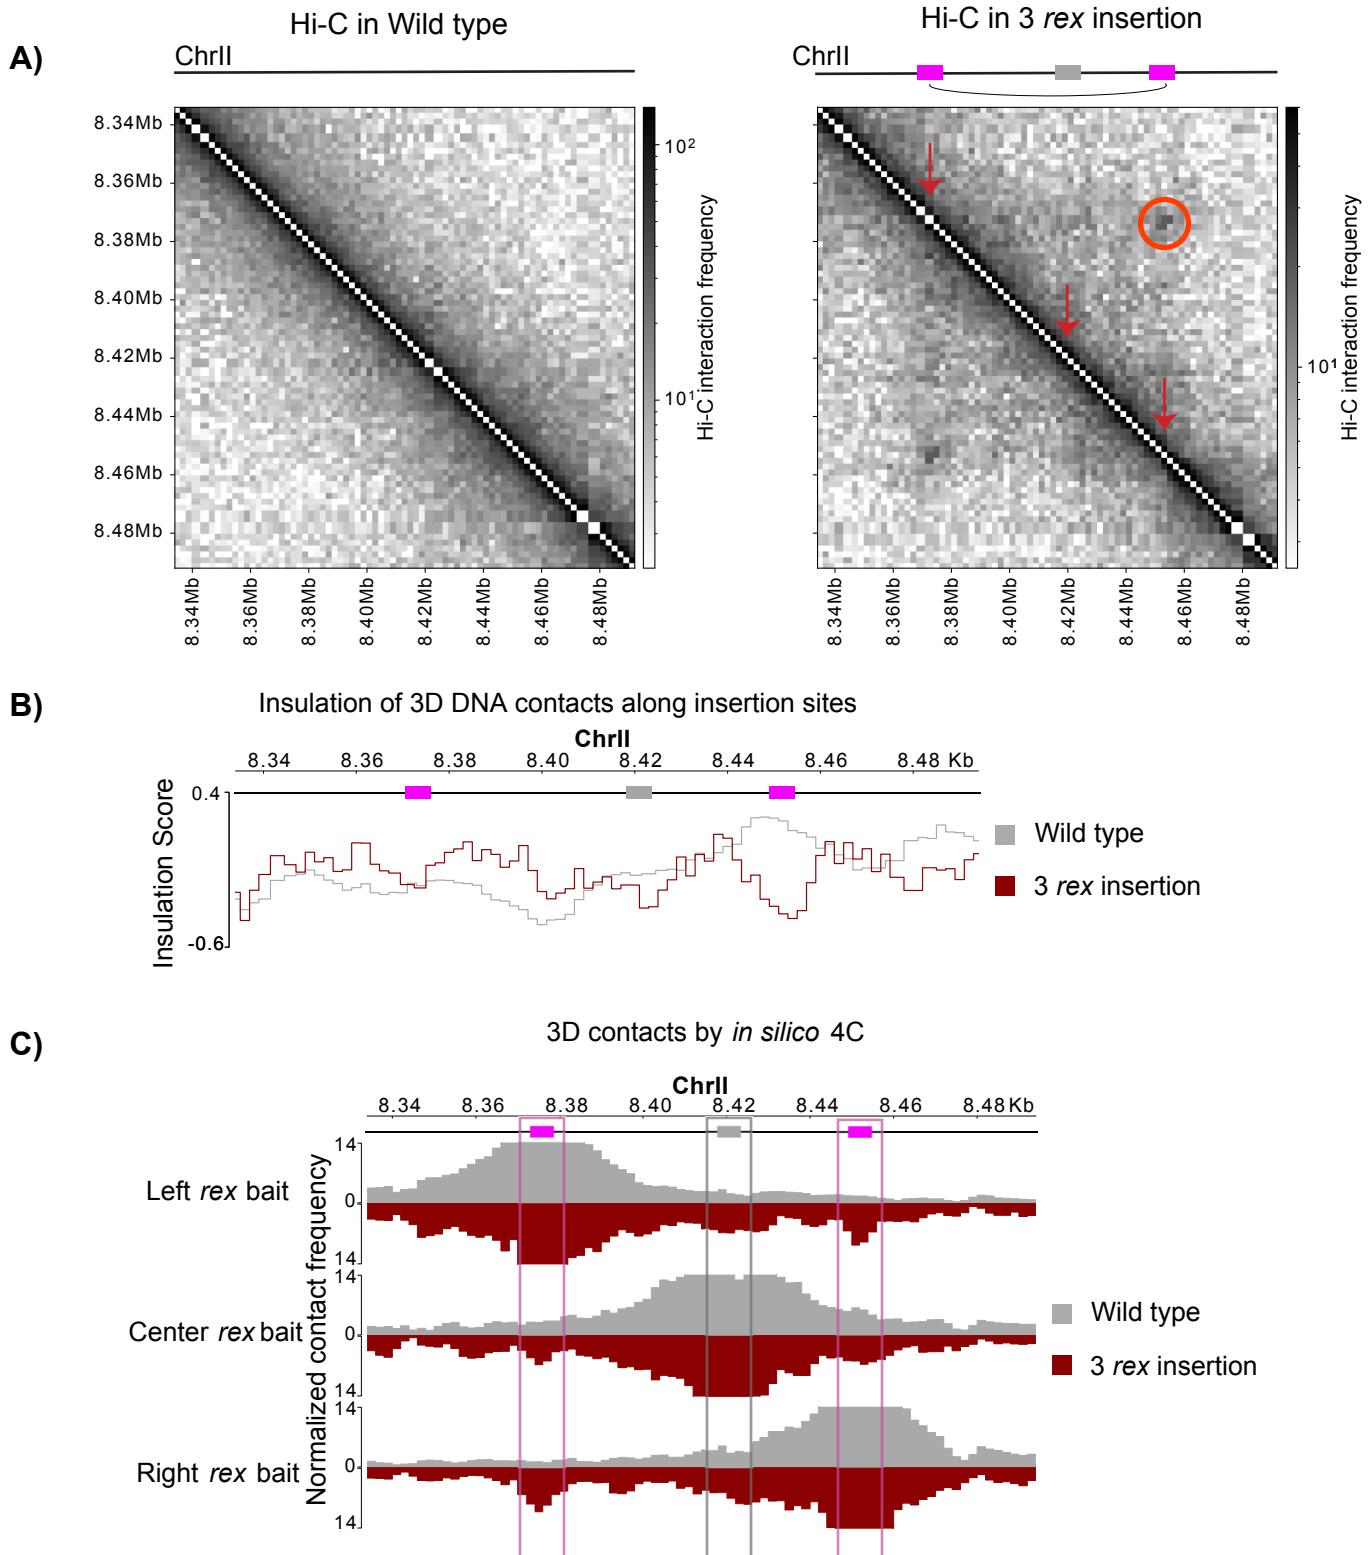

### Figure 3

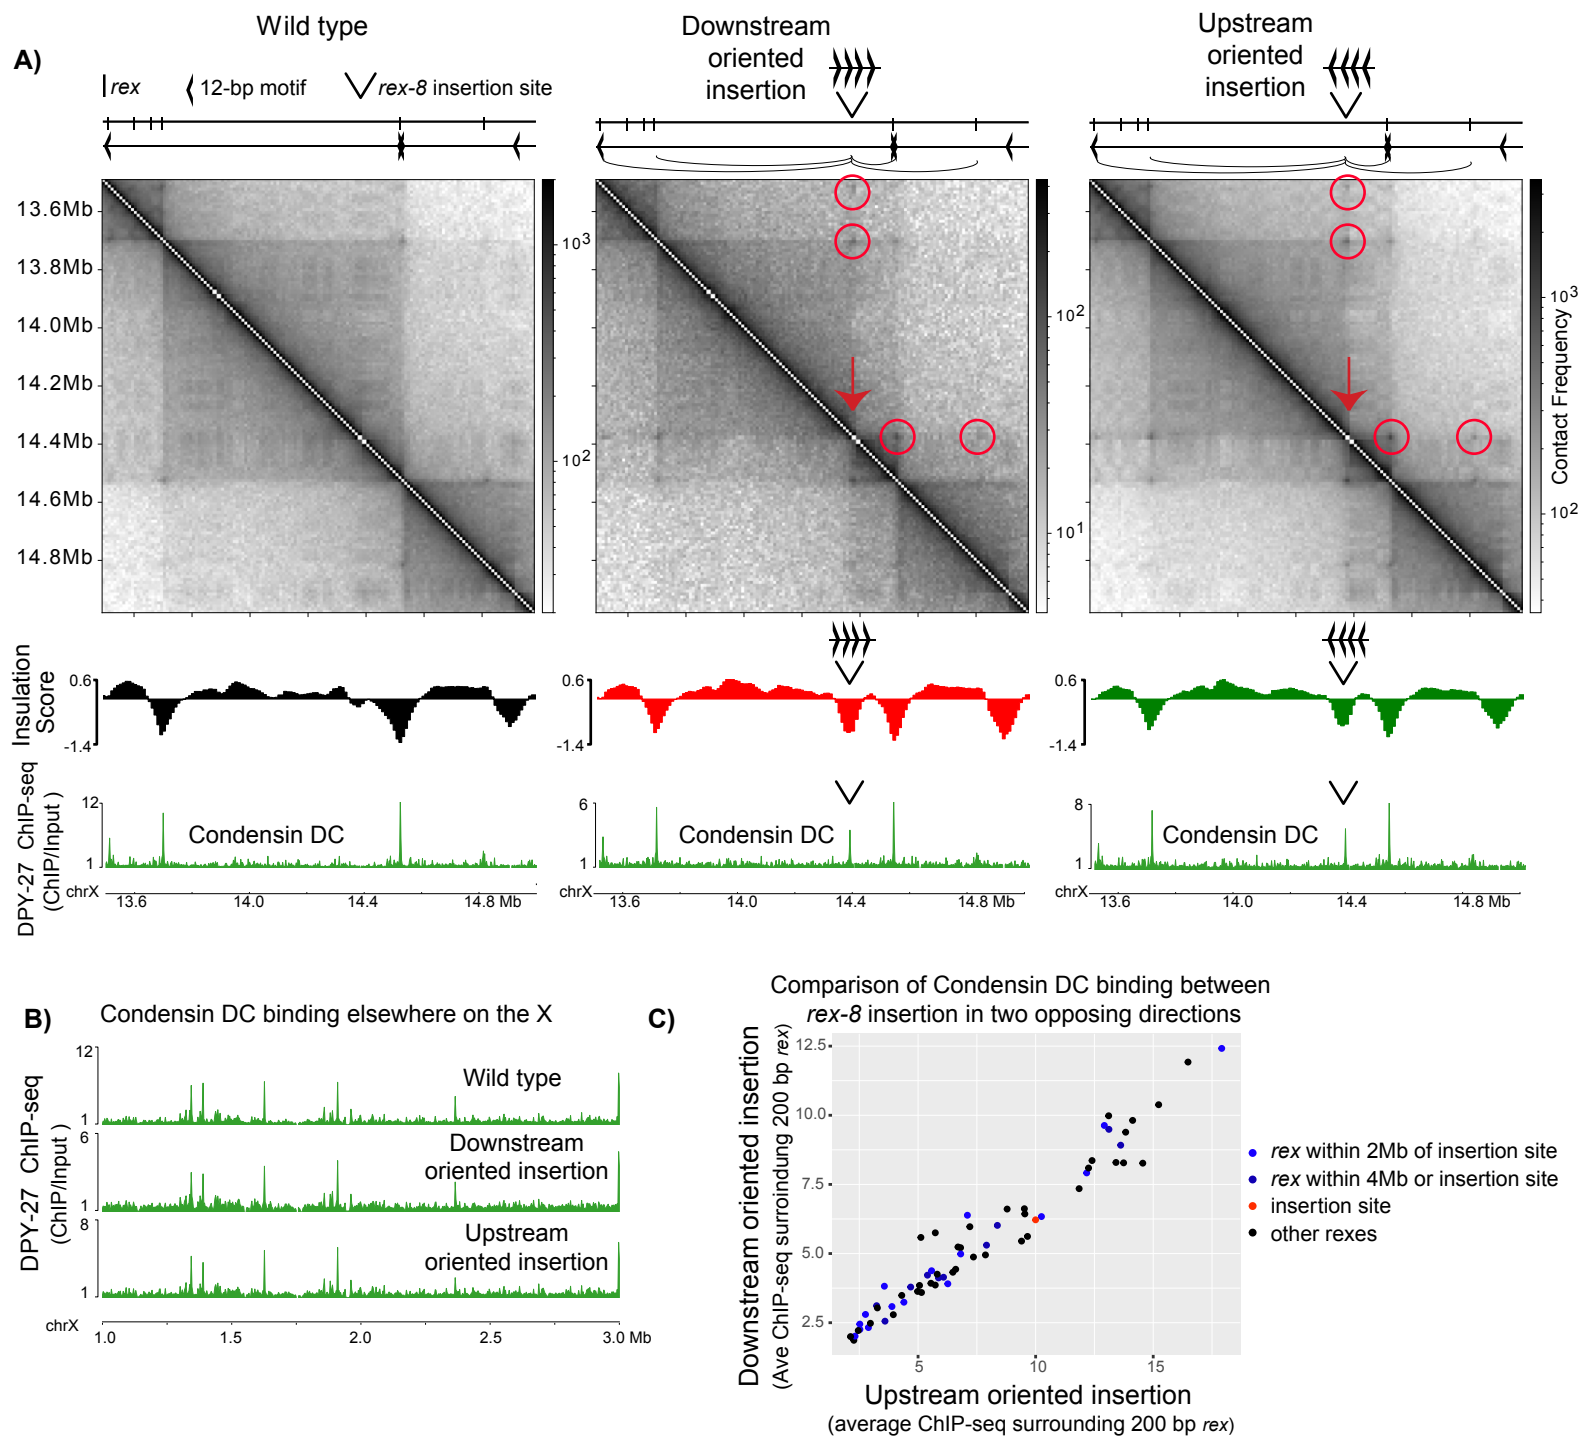



### Figure 3 Supplement

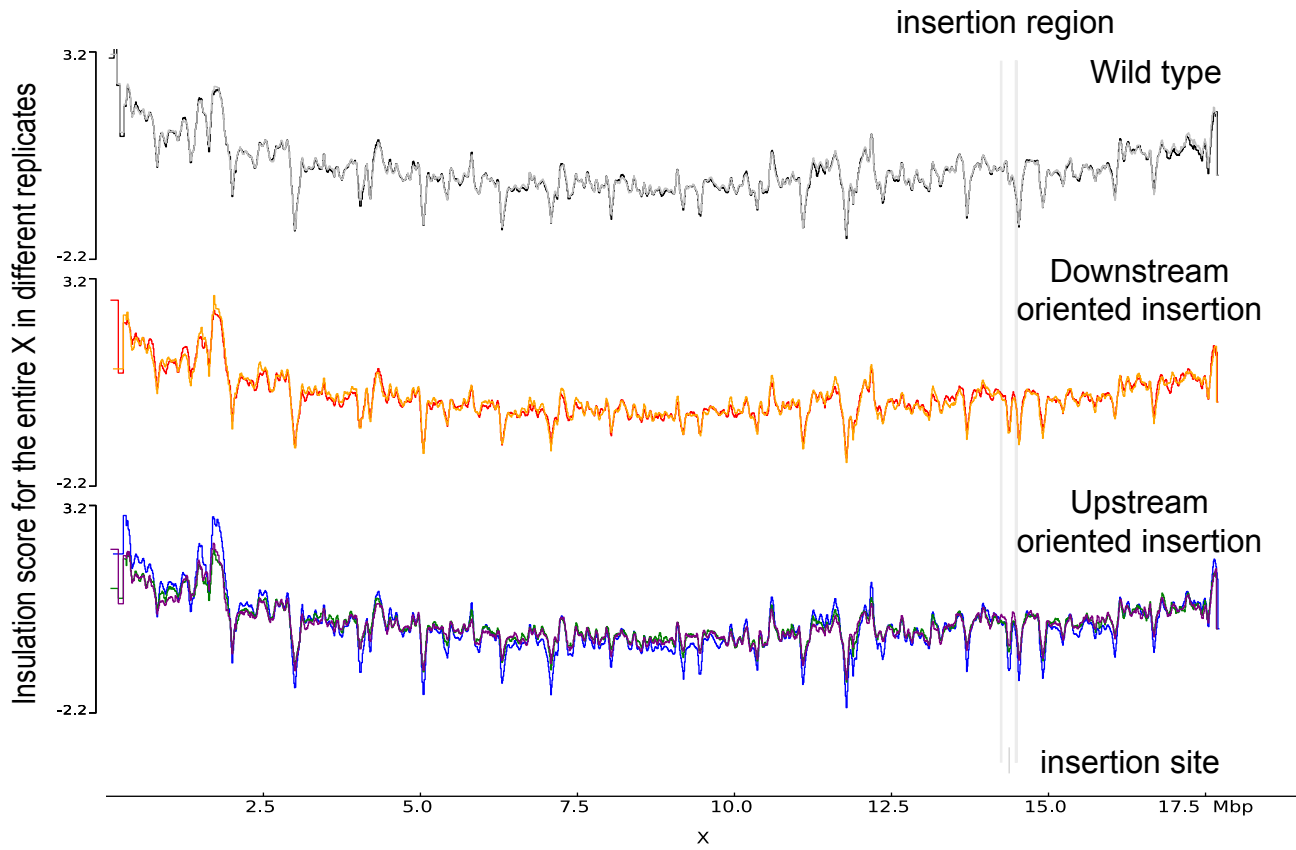

## Figure 4

### Wild type karyotype versus. X;V fusion chromosome Hi-C

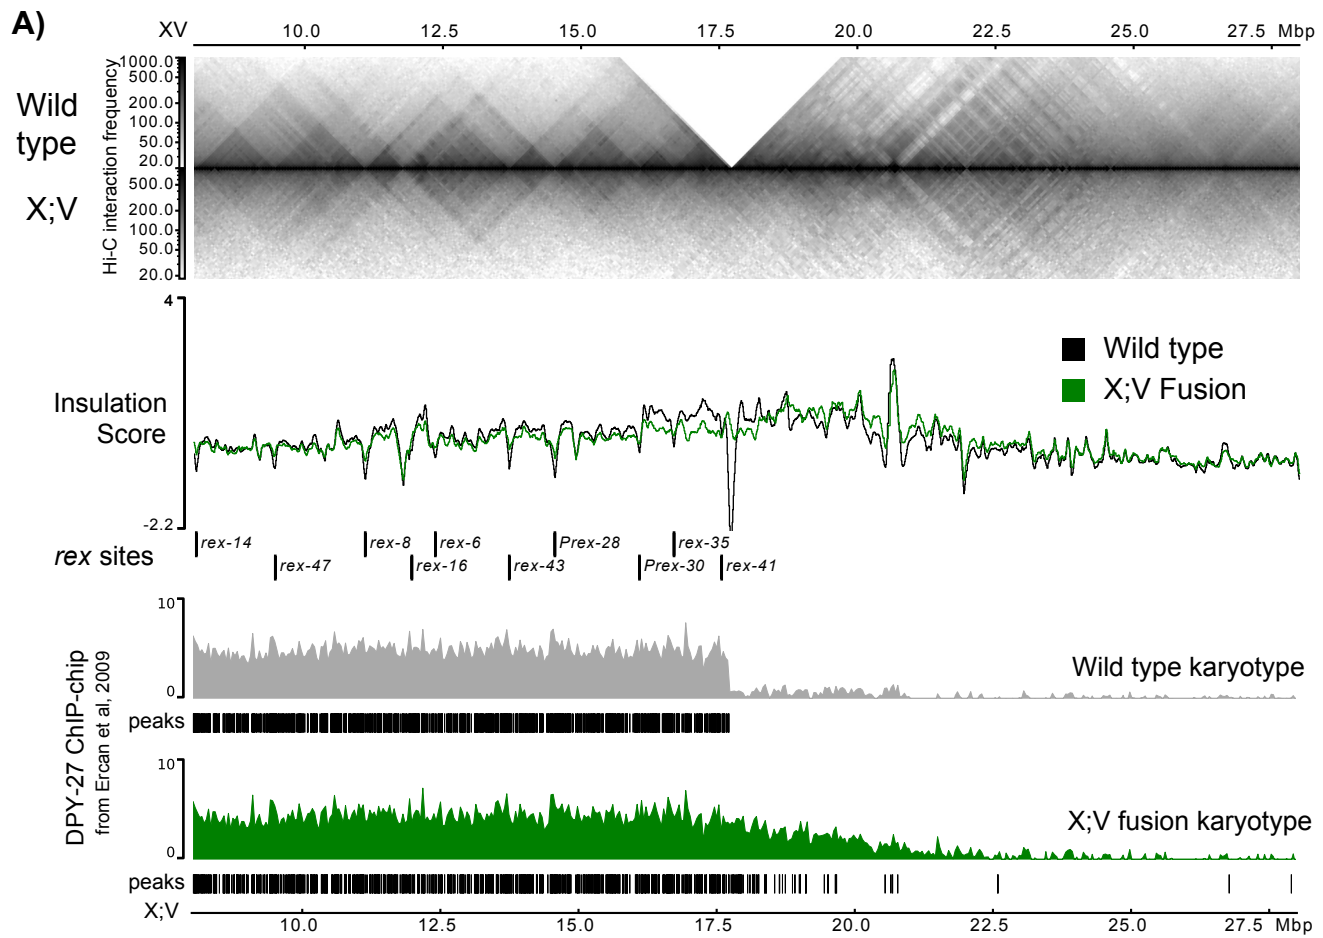

**B)** Normalized X;V/Wt Hi-C contact probability by distance in Mb scale regions

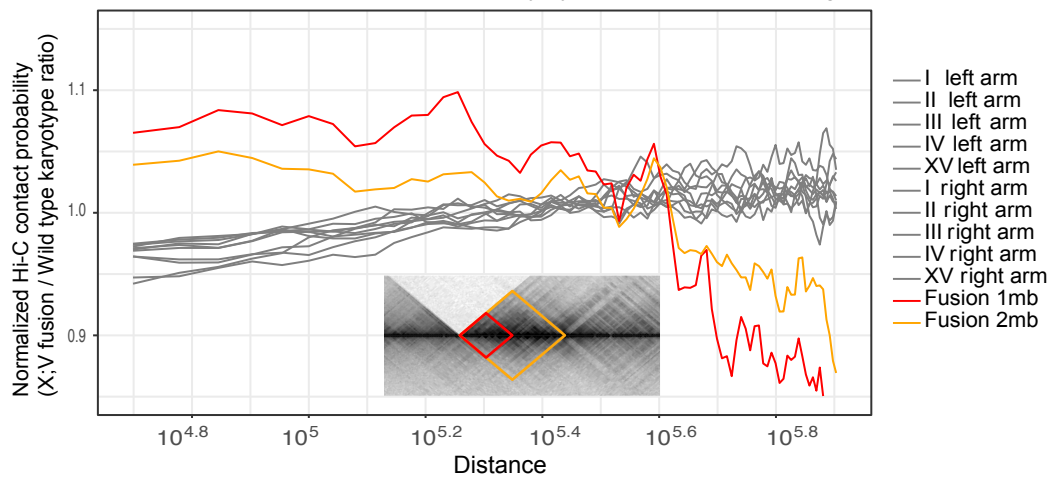

## Figure 4 Supplement

### Wild type karyotype versus. X;V fusion chromosome Hi-C Single Crosslink

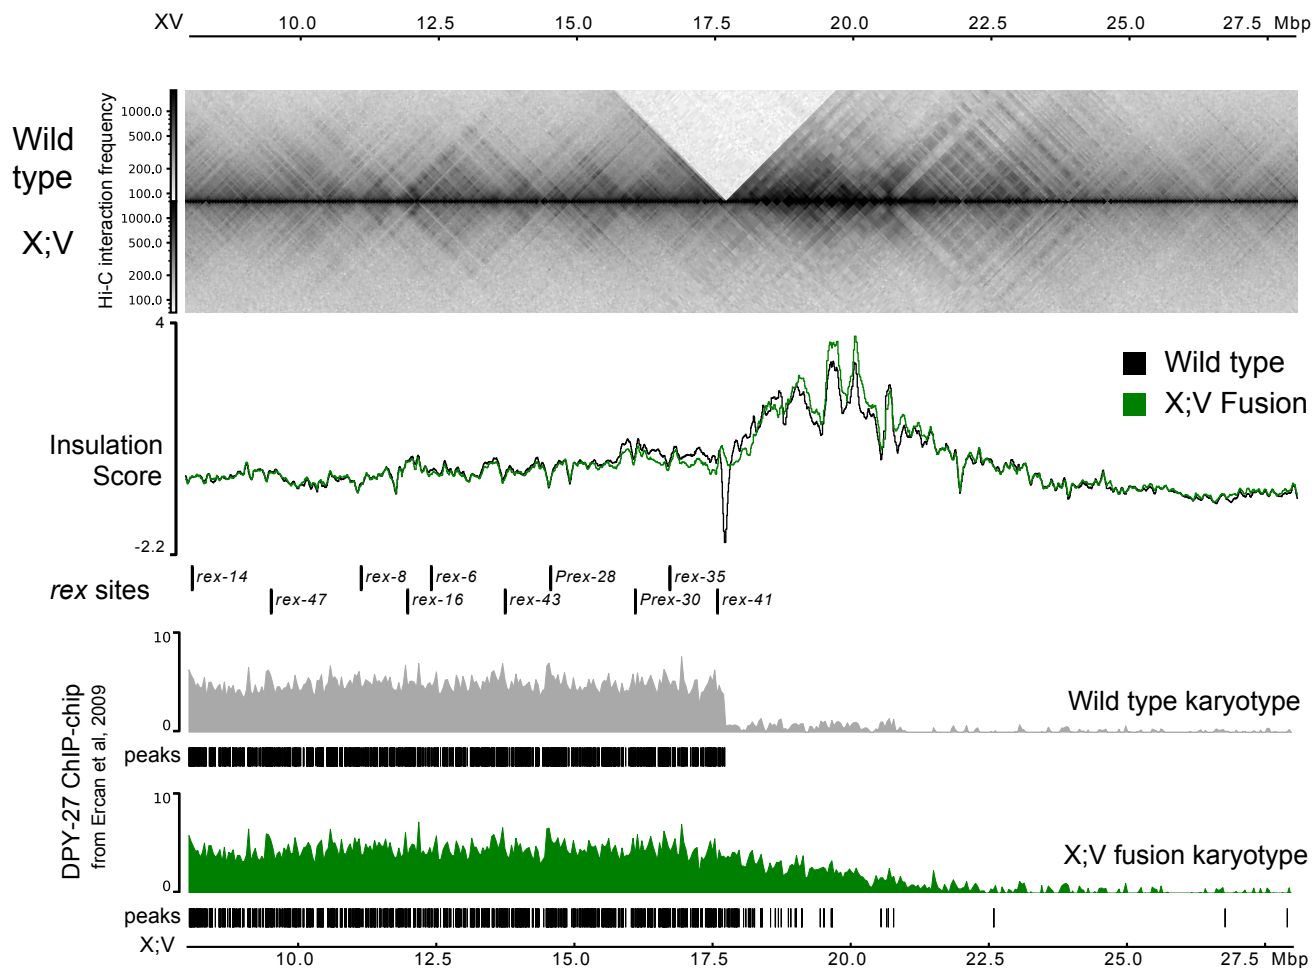

### Normalized X;V/Wt Hi-C contact probability by distance in Mb scale regions

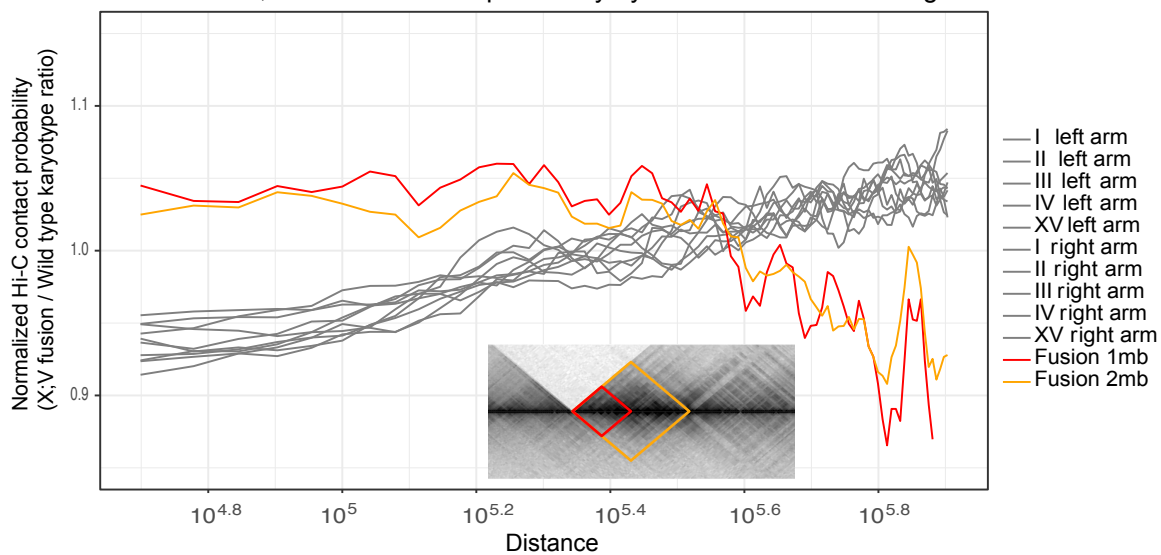

**Figure 5**

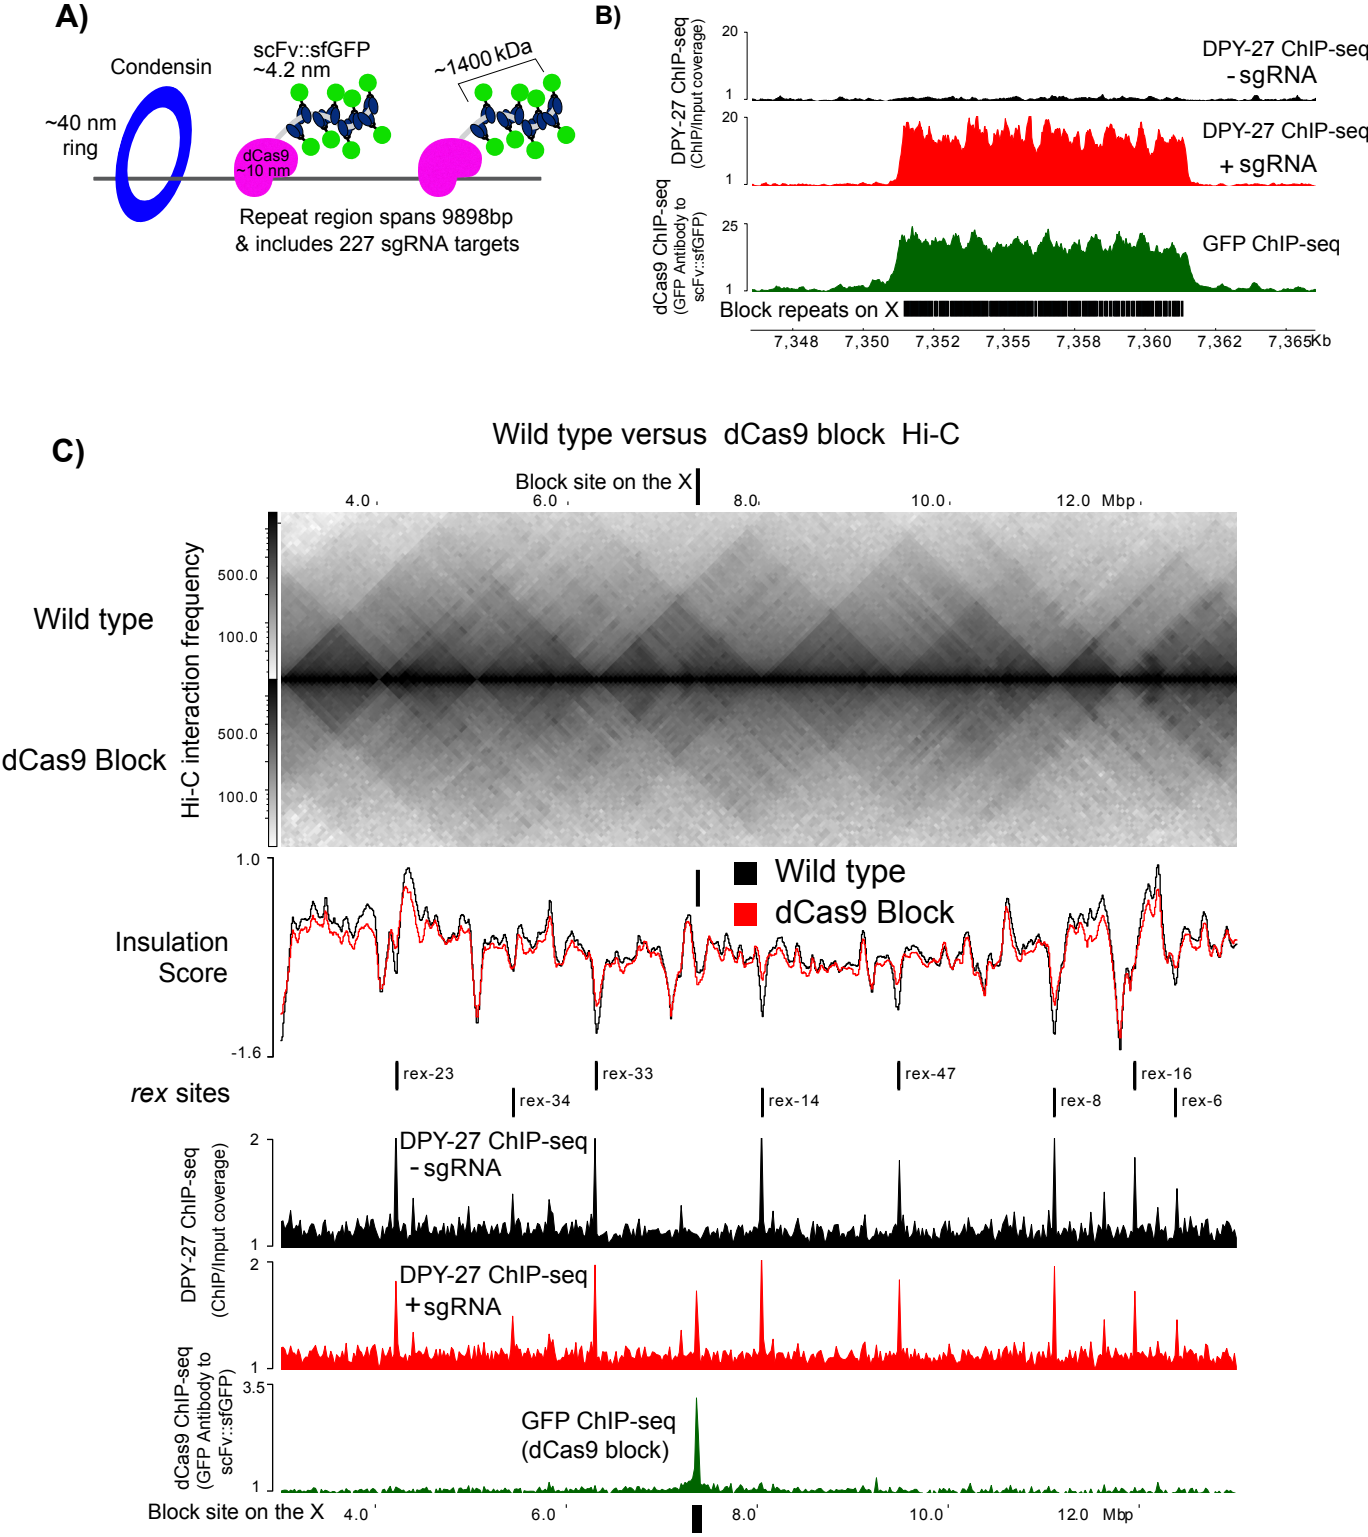

## Figure 6

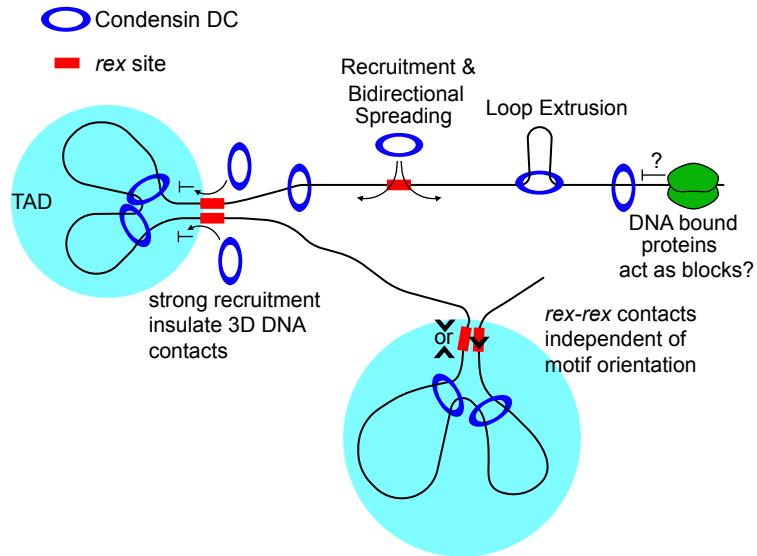

Source: https://biorxiv.org/content/10.1101/2021.03.23.436694v1.full.pdf
