# Supplementary material for: Condensin DC loads and spreads from recruitment sites to create loop-anchored TADs in C. elegans
Source: bioRxiv preprint, doi:10.1101/2021.03.23.436694, version 2 (2022-07-01)
Supplement: Supplemental File 1 [file 436694_file03.xlsx]

## Sheet: ChIP-seq
GEO	GEO label	strain	stage	seqID	ChIP-target/input	antibody
GSM6241170	SDC3_L3_ext99_rep1 [SEA189]	N2	L3	SEA189	SDC3	Q4047
GSM6241171	SDC3_L3_ext344_rep2 [LAS64]	N2	L3	LAS64	SDC3	Q4047
GSM6241172	input_L3_ext344_rep2 [LAS50]	N2	L3	LAS50	input
GSM6241173	DPY27_ERC69_emb_rep1 [LAS55]	ERC69 (rex-8 in X); ersIs33[X:11093924-11094281[rex-8], X:14373128]	Embryo	LAS55	DPY27	JL
GSM6241174	DPY27_ERC69_emb_rep2 [DJ84]	ERC69 (rex-8 in X); ersIs33[X:11093924-11094281[rex-8], X:14373128]	Embryo	DJ84	DPY27	JL
GSM6241175	input_ERC69_emb_rep1 [LAS57]	ERC69 (rex-8 in X); ersIs33[X:11093924-11094281[rex-8], X:14373128]	Embryo	LAS57	input
GSM6241176	input_ERC69_emb_rep2 [DJ80]	ERC69 (rex-8 in X); ersIs33[X:11093924-11094281[rex-8], X:14373128]	Embryo	DJ80	input
GSM6241177	DPY27_ERC80_emb_rep1 [JK12]	ERC80 (rex-8flip in X); ersIs52[X:11094281-11093924[rex-8reverse], X:14373128]	Embryo	JK12	DPY27	JL
GSM6241178	DPY27_ERC80_emb_rep2 [JK23]	ERC80 (rex-8flip in X); ersIs52[X:11094281-11093924[rex-8reverse], X:14373128]	Embryo	JK23	DPY27	JL
GSM6241179	DPY27_ERC80_emb_rep3 [JK24]	ERC80 (rex-8flip in X); ersIs52[X:11094281-11093924[rex-8reverse], X:14373128]	Embryo	JK24	DPY27	JL
GSM6241180	input_ERC80_emb_rep1 [JK14]	ERC80 (rex-8flip in X); ersIs52[X:11094281-11093924[rex-8reverse], X:14373128]	Embryo	JK14	input
GSM6241181	input_ERC80_emb_rep2 [JK18]	ERC80 (rex-8flip in X); ersIs52[X:11094281-11093924[rex-8reverse], X:14373128]	Embryo	JK18	input
GSM6241182	input_ERC80_emb_rep3 [JK19]	ERC80 (rex-8flip in X); ersIs52[X:11094281-11093924[rex-8reverse], X:14373128]	Embryo	JK19	input
GSM6241183	DPY27_N2_L3_rep1 [JK66]	N2	L3	JK66	DPY27	JL
GSM6241184	DPY27_N2_L3_rep2 [JK65]	N2	L3	JK65	DPY27	JL
GSM6241185	DPY27_N2_L3_rep3 [JK64]	N2	L3	JK64	DPY27	JL
GSM6241186	input_N2_L3_rep1 [JK56]	N2	L3	JK56	input
GSM6241187	input_N2_L3_rep2 [JK55]	N2	L3	JK55	input
GSM6241188	input_N2_L3_rep3 [JK54]	N2	L3	JK54	input
GSM6241189	DPY27_ERC61_L3_rep1 [JK69]	ERC61 (rex-8 in II); ersSi25[wt400bp_rex8, cb-unc-119(+)] II; unc-119(ed3) III	L3	JK69	DPY27	JL
GSM6241190	DPY27_ERC61_L3_rep2 [JK67]	ERC61 (rex-8 in II); ersSi25[wt400bp_rex8, cb-unc-119(+)] II; unc-119(ed3) III	L3	JK67	DPY27	JL
GSM6241191	DPY27_ERC61_L3_rep3 [JK68]	ERC61 (rex-8 in II); ersSi25[wt400bp_rex8, cb-unc-119(+)] II; unc-119(ed3) III	L3	JK68	DPY27	JL
GSM6241192	input_ERC61_L3_rep1 [JK59]	ERC61 (rex-8 in II); ersSi25[wt400bp_rex8, cb-unc-119(+)] II; unc-119(ed3) III	L3	JK59	input
GSM6241193	input_ERC61_L3_rep2 [JK57]	ERC61 (rex-8 in II); ersSi25[wt400bp_rex8, cb-unc-119(+)] II; unc-119(ed3) III	L3	JK57	input
GSM6241194	input_ERC61_L3_rep3 [JK58]	ERC61 (rex-8 in II); ersSi25[wt400bp_rex8, cb-unc-119(+)] II; unc-119(ed3) III	L3	JK58	input
GSM6241195	DPY27_ERC63_L3_rep1 [JK72]	ERC63 (rex-8,rex-1,rex-8 in II); ersIs27[X:11093923-11094322[rex-8], II:8371600, II:8449968); knuSi254[SNP400bprex-1, unc-119(+)] II; unc-119(ed3) III	L3	JK72	DPY27	JL
GSM6241196	DPY27_ERC63_L3_rep2 [JK70]	ERC63 (rex-8,rex-1,rex-8 in II); ersIs27[X:11093923-11094322[rex-8], II:8371600, II:8449968); knuSi254[SNP400bprex-1, unc-119(+)] II; unc-119(ed3) III	L3	JK70	DPY27	JL
GSM6241197	DPY27_ERC63_L3_rep3 [JK71]	ERC63 (rex-8,rex-1,rex-8 in II); ersIs27[X:11093923-11094322[rex-8], II:8371600, II:8449968); knuSi254[SNP400bprex-1, unc-119(+)] II; unc-119(ed3) III	L3	JK71	DPY27	JL
GSM6241198	input_ERC63_L3_rep1 [JK62]	ERC63 (rex-8,rex-1,rex-8 in II); ersIs27[X:11093923-11094322[rex-8], II:8371600, II:8449968); knuSi254[SNP400bprex-1, unc-119(+)] II; unc-119(ed3) III	L3	JK62	input
GSM6241199	input_ERC63_L3_rep2 [JK61]	ERC63 (rex-8,rex-1,rex-8 in II); ersIs27[X:11093923-11094322[rex-8], II:8371600, II:8449968); knuSi254[SNP400bprex-1, unc-119(+)] II; unc-119(ed3) III	L3	JK61	input
GSM6241200	input_ERC63_L3_rep3 [JK60]	ERC63 (rex-8,rex-1,rex-8 in II); ersIs27[X:11093923-11094322[rex-8], II:8371600, II:8449968); knuSi254[SNP400bprex-1, unc-119(+)] II; unc-119(ed3) III	L3	JK60	input
GSM6241201	DPY27_ERC90_L3_rep1 [AKM365]	ERC90 (super rex in II); ersIs62[superrex(rex40,rex8,rex35)x2],II:8420106]	L3	AKM365	DPY27	JL
GSM6241202	DPY27_ERC90_L3_rep2 [JK116]	ERC90 (super rex in II); ersIs62[superrex(rex40,rex8,rex35)x2],II:8420106]	L3	JK116	DPY27	JL
GSM6241203	DPY27_ERC90_L3_rep3 [JK97]	ERC90 (super rex in II); ersIs62[superrex(rex40,rex8,rex35)x2],II:8420106]	L3	JK97	DPY27	JL
GSM6241204	input_ERC90_L3_rep1 [AKM369]	ERC90 (super rex in II); ersIs62[superrex(rex40,rex8,rex35)x2],II:8420106]	L3	AKM369	input
GSM6241205	input_ERC90_L3_rep2 [JK119]	ERC90 (super rex in II); ersIs62[superrex(rex40,rex8,rex35)x2],II:8420106]	L3	JK119	input
GSM6241206	input_ERC90_L3_rep3 [JK101]	ERC90 (super rex in II); ersIs62[superrex(rex40,rex8,rex35)x2],II:8420106]	L3	JK101	input
GSM6241207	DPY27_ERC06_emb_rep1 [LW13]	ERC06 (rex-1 in II); knuSi254[DCC undisclosed, unc-119(+)] II; unc-119(ed3) III	Embryo	LW13	DPY27	JL
GSM6241208	DPY27_ERC06_emb_rep1 [SE278]	ERC06 (rex-1 in II); knuSi254[DCC undisclosed, unc-119(+)] II; unc-119(ed3) III	Embryo	SE278	DPY27	JL
GSM6241209	input_ERC06_emb_rep1 [LW17]	ERC06 (rex-1 in II); knuSi254[DCC undisclosed, unc-119(+)] II; unc-119(ed3) III	Embryo	LW17	input
GSM6241210	input_ERC06_emb_rep2 [SE257]	ERC06 (rex-1 in II); knuSi254[DCC undisclosed, unc-119(+)] II; unc-119(ed3) III	Embryo	SE257	input
GSM6241211	DPY27_ERC61_emb_rep1 [JK94]	ERC61 (rex-8 in II); ersSi25[wt400bp_rex8, cb-unc-119(+)] II; unc-119(ed3) III	Embryo	JK94	DPY27	JL
GSM6241212	DPY27_ERC61_emb_rep2 [JK80]	ERC61 (rex-8 in II); ersSi25[wt400bp_rex8, cb-unc-119(+)] II; unc-119(ed3) III	Embryo	JK80	DPY27	JL
GSM6241213	input_ERC61_emb_rep1 [JK76]	ERC61 (rex-8 in II); ersSi25[wt400bp_rex8, cb-unc-119(+)] II; unc-119(ed3) III	Embryo	JK76	input
GSM6241214	input_ERC61_emb_rep2 [JK98]	ERC61 (rex-8 in II); ersSi25[wt400bp_rex8, cb-unc-119(+)] II; unc-119(ed3) III	Embryo	JK98	input
GSM6241215	DPY27_ERC62_emb_rep1 [LAS04]	ERC62 (rex-8, rex-1 in II); ersIs26[X:11093923-11094322[rex-8], II: 8449965); knuSi254[SNP400bprex-1, unc-119(+)] II; unc-119(ed3) III	Embryo	LAS04	DPY27	JL
GSM6241216	DPY27_ERC62_emb_rep2 [LAS05]	ERC62 (rex-8, rex-1 in II); ersIs26[X:11093923-11094322[rex-8], II: 8449965); knuSi254[SNP400bprex-1, unc-119(+)] II; unc-119(ed3) III	Embryo	LAS05	DPY27	JL
GSM6241217	input_ERC62_emb [LAS09]	ERC62 (rex-8, rex-1 in II); ersIs26[X:11093923-11094322[rex-8], II: 8449965); knuSi254[SNP400bprex-1, unc-119(+)] II; unc-119(ed3) III	Embryo	LAS09	input
GSM6241218	DPY27_ERC63_emb_rep1 [LAS06]	ERC63 (rex-8,rex-1,rex-8 in II); ersIs27[X:11093923-11094322[rex-8], II:8371600, II:8449968); knuSi254[SNP400bprex-1, unc-119(+)] II; unc-119(ed3) III	Embryo	LAS06	DPY27	JL
GSM6241219	DPY27_ERC63_emb_rep2 [LAS07]	ERC63 (rex-8,rex-1,rex-8 in II); ersIs27[X:11093923-11094322[rex-8], II:8371600, II:8449968); knuSi254[SNP400bprex-1, unc-119(+)] II; unc-119(ed3) III	Embryo	LAS07	DPY27	JL
GSM6241220	input_ERC63_emb [LAS03]	ERC63 (rex-8,rex-1,rex-8 in II); ersIs27[X:11093923-11094322[rex-8], II:8371600, II:8449968); knuSi254[SNP400bprex-1, unc-119(+)] II; unc-119(ed3) III	Embryo	LAS03	input
GSM6241221	DPY27_JZ1973_emb_rep1 [JK21]	JZ1973 (dcas9 suntag); pySi[Pfib-1:NLS:scFv:sfGFP/unc-119(+) ] I; pySi[Pfib-1:NLS:dCas9:24xGCN4/unc-119(+) ] II; unc-119(ed3) III	Embryo	JK21	DPY27	JL
GSM6241222	DPY27_JZ1973_emb_rep2 [JK30]	JZ1973 (dcas9 suntag); pySi[Pfib-1:NLS:scFv:sfGFP/unc-119(+) ] I; pySi[Pfib-1:NLS:dCas9:24xGCN4/unc-119(+) ] II; unc-119(ed3) III	Embryo	JK30	DPY27	JL
GSM6241223	input_JZ1973_emb [JK16]	JZ1973 (dcas9 suntag); pySi[Pfib-1:NLS:scFv:sfGFP/unc-119(+) ] I; pySi[Pfib-1:NLS:dCas9:24xGCN4/unc-119(+) ] II; unc-119(ed3) III	Embryo	JK16	input
GSM6241224	IgG_JZ1973_emb [JK29]	JZ1973 (dcas9 suntag); pySi[Pfib-1:NLS:scFv:sfGFP/unc-119(+) ] I; pySi[Pfib-1:NLS:dCas9:24xGCN4/unc-119(+) ] II; unc-119(ed3) III	Embryo	JK29	IgG	Abcam,ab46540
GSM6241225	DPY27_JZ2005_emb_rep1 [JK11]	JZ2005 (dcas9 suntag, sgRNA); pySi[Pfib-1:NLS:scFv:sfGFP/unc-119(+) ] I; pySi[Pfib-1:NLS:dCas9:24xGCN4/unc-119(+) ] II; unc-119(ed3)?III; pyIs(pU6:sgRNA-X227/Punc-122:mcherry).	Embryo	JK11	DPY27	JL
GSM6241226	DPY27_JZ2005_emb_rep2 [JK22]	JZ2005 (dcas9 suntag, sgRNA); pySi[Pfib-1:NLS:scFv:sfGFP/unc-119(+) ] I; pySi[Pfib-1:NLS:dCas9:24xGCN4/unc-119(+) ] II; unc-119(ed3)?III; pyIs(pU6:sgRNA-X227/Punc-122:mcherry).	Embryo	JK22	DPY27	JL
GSM6241227	input_JZ2005_emb_rep1 [DJ79]	JZ2005 (dcas9 suntag, sgRNA); pySi[Pfib-1:NLS:scFv:sfGFP/unc-119(+) ] I; pySi[Pfib-1:NLS:dCas9:24xGCN4/unc-119(+) ] II; unc-119(ed3)?III; pyIs(pU6:sgRNA-X227/Punc-122:mcherry).	Embryo	DJ79	input
GSM6241228	input_JZ2005_emb_rep2 [JK36]	JZ2005 (dcas9 suntag, sgRNA); pySi[Pfib-1:NLS:scFv:sfGFP/unc-119(+) ] I; pySi[Pfib-1:NLS:dCas9:24xGCN4/unc-119(+) ] II; unc-119(ed3)?III; pyIs(pU6:sgRNA-X227/Punc-122:mcherry).	Embryo	JK36	input
GSM6241229	IgG_JZ2005_emb_rep1 [JK33]	JZ2005 (dcas9 suntag, sgRNA); pySi[Pfib-1:NLS:scFv:sfGFP/unc-119(+) ] I; pySi[Pfib-1:NLS:dCas9:24xGCN4/unc-119(+) ] II; unc-119(ed3)?III; pyIs(pU6:sgRNA-X227/Punc-122:mcherry).	Embryo	JK33	IgG	Abcam,ab46540
GSM6241230	IgG_JZ2005_emb_rep2 [JK37]	JZ2005 (dcas9 suntag, sgRNA); pySi[Pfib-1:NLS:scFv:sfGFP/unc-119(+) ] I; pySi[Pfib-1:NLS:dCas9:24xGCN4/unc-119(+) ] II; unc-119(ed3)?III; pyIs(pU6:sgRNA-X227/Punc-122:mcherry).	Embryo	JK37	IgG	Abcam,ab46540
GSM6241231	DPY27_protG_JZ2005_emb [JK46]	JZ2005 (dcas9 suntag, sgRNA); pySi[Pfib-1:NLS:scFv:sfGFP/unc-119(+) ] I; pySi[Pfib-1:NLS:dCas9:24xGCN4/unc-119(+) ] II; unc-119(ed3)?III; pyIs(pU6:sgRNA-X227/Punc-122:mcherry).	Embryo	JK46	DPY27	JL
GSM6241232	GFP_JZ2005_emb_rep1 [DJ86]	JZ2005 (dcas9 suntag, sgRNA); pySi[Pfib-1:NLS:scFv:sfGFP/unc-119(+) ] I; pySi[Pfib-1:NLS:dCas9:24xGCN4/unc-119(+) ] II; unc-119(ed3)?III; pyIs(pU6:sgRNA-X227/Punc-122:mcherry).	Embryo	DJ86	GFP	Abcam,ab290
GSM6241233	GFP_JZ2005_emb_rep2 [DJ83]	JZ2005 (dcas9 suntag, sgRNA); pySi[Pfib-1:NLS:scFv:sfGFP/unc-119(+) ] I; pySi[Pfib-1:NLS:dCas9:24xGCN4/unc-119(+) ] II; unc-119(ed3)?III; pyIs(pU6:sgRNA-X227/Punc-122:mcherry).	Embryo	DJ83	GFP	Abcam,ab290
GSM6241234	protA_JZ2005_emb_rep1 [JK41]	JZ2005 (dcas9 suntag, sgRNA); pySi[Pfib-1:NLS:scFv:sfGFP/unc-119(+) ] I; pySi[Pfib-1:NLS:dCas9:24xGCN4/unc-119(+) ] II; unc-119(ed3)?III; pyIs(pU6:sgRNA-X227/Punc-122:mcherry).	Embryo	JK41	protA
GSM6241235	protA_JZ2005_emb_rep2 [JK42]	JZ2005 (dcas9 suntag, sgRNA); pySi[Pfib-1:NLS:scFv:sfGFP/unc-119(+) ] I; pySi[Pfib-1:NLS:dCas9:24xGCN4/unc-119(+) ] II; unc-119(ed3)?III; pyIs(pU6:sgRNA-X227/Punc-122:mcherry).	Embryo	JK42	protA
GSM6241236	protG_JZ2005_emb_rep1 [JK43]	JZ2005 (dcas9 suntag, sgRNA); pySi[Pfib-1:NLS:scFv:sfGFP/unc-119(+) ] I; pySi[Pfib-1:NLS:dCas9:24xGCN4/unc-119(+) ] II; unc-119(ed3)?III; pyIs(pU6:sgRNA-X227/Punc-122:mcherry).	Embryo	JK43	protG
GSM6241237	protG_JZ2005_emb_rep2 [JK45]	JZ2005 (dcas9 suntag, sgRNA); pySi[Pfib-1:NLS:scFv:sfGFP/unc-119(+) ] I; pySi[Pfib-1:NLS:dCas9:24xGCN4/unc-119(+) ] II; unc-119(ed3)?III; pyIs(pU6:sgRNA-X227/Punc-122:mcherry).	Embryo	JK45	protG
Published ChIP-seq data used in this study
GEO #	Data name	Strain	Stage	Target	Antibody	Reference
GSE87741	DPY27_N2_Emb_SE30_CJ39_CJ132_SE172	N2	mixed embryo	DPY-27	JL00001	Albritton et al Elife 2017
GSE16621	JL00001_DPY27_N2_MXemb_ChIP	N2	mixed embryo	DPY-27	JL00001	Ercan et al Current Biology 2009
GSE16621	JL00001_DPY27_YPT47_MXemb_ChIP	YPT47	mixed embryo	DPY-27	JL00001	Ercan et al Current Biology 2009
GSE122639.	H3K27ac_N2_emb_rep1/2/3	N2	Embryo	H3K27ac	Abcam, ab4729	Street et al Genetics 2019
modEncode_5054	seq-WA30634849 H3K27ac N2 L3	N2	L3	H3K27ac	WA306-34849_H3K27ac	http://data.modencode.org/cgi-bin/findFiles.cgi?download=5054
modEncode_5163	seq-HK00013 H3K27me3 1E7 N2 Eemb	N2	Early Embryo	H3K27me3	HK00013 H3K27me3:1E7:JL:1	http://data.modencode.org/cgi-bin/findFiles.cgi?download=5163
modEncode_5055	seq-WA30834809 H3K4me2 N2 L3	N2	L3	H3K27me3	WA30834809 H3K4me2	http://data.modencode.org/cgi-bin/findFiles.cgi?download=5055

## Sheet: ChIP-seq statistics
SEA189	LAS64	LAS50	LAS55	DJ84	LAS57	DJ80	JK12	JK23	JK24	JK14	JK18	JK19	JK66	JK65	JK64	JK56	JK55	JK54	JK69	JK67	JK68	JK59	JK57	JK58	JK72	JK70	JK71	JK62	JK61	JK60	AKM365	JK116	JK97	AKM369	JK119	JK101	LW13	SE278	LW17	SE257	JK94	JK80	JK76	JK98	LAS04	LAS05	LAS09	LAS06	LAS07
9243704 reads; of these	22496276 reads; of these	9950462 reads; of these	60475084 reads; of these	10514863 reads; of these	47907258 reads; of these	12701810 reads; of these	13755672 reads; of these	11513557 reads; of these	12305094 reads; of these	19213797 reads; of these	13764712 reads; of these	10977886 reads; of these	14915841 reads; of these	12212805 reads; of these	15171167 reads; of these	13232199 reads; of these	12666569 reads; of these	12096013 reads; of these	17327293 reads; of these	22013041 reads; of these	8234750 reads; of these	12281118 reads; of these	11388407 reads; of these	10528439 reads; of these	14135831 reads; of these	19485839 reads; of these	15058684 reads; of these	13334048 reads; of these	9141573 reads; of these	11518478 reads; of these	18101822 reads; of these	23556759 reads; of these	35799607 reads; of these	23868984 reads; of these	23718917 reads; of these	34274545 reads; of these	3543318 reads; of these	17744254 reads; of these	9288481 reads; of these	10237567 reads; of these	41359758 reads; of these	22188057 reads; of these	37070635 reads; of these	38142100 reads; of these	12931999 reads; of these	26032717 reads; of these	19323581 reads; of these	19274405 reads; of these	16652358 reads; of these
9243704 (100.00%) were unpaired; of these	22496276 (100.00%) were unpaired; of these	9950462 (100.00%) were unpaired; of these	60475084 (100.00%) were unpaired; of these	10514863 (100.00%) were unpaired; of these	47907258 (100.00%) were unpaired; of these	12701810 (100.00%) were unpaired; of these	13755672 (100.00%) were unpaired; of these	11513557 (100.00%) were unpaired; of these	12305094 (100.00%) were unpaired; of these	19213797 (100.00%) were unpaired; of these	13764712 (100.00%) were unpaired; of these	10977886 (100.00%) were unpaired; of these	14915841 (100.00%) were unpaired; of these	12212805 (100.00%) were unpaired; of these	15171167 (100.00%) were unpaired; of these	13232199 (100.00%) were unpaired; of these	12666569 (100.00%) were unpaired; of these	12096013 (100.00%) were unpaired; of these	17327293 (100.00%) were unpaired; of these	22013041 (100.00%) were unpaired; of these	8234750 (100.00%) were unpaired; of these	12281118 (100.00%) were unpaired; of these	11388407 (100.00%) were unpaired; of these	10528439 (100.00%) were unpaired; of these	14135831 (100.00%) were unpaired; of these	19485839 (100.00%) were unpaired; of these	15058684 (100.00%) were unpaired; of these	13334048 (100.00%) were unpaired; of these	9141573 (100.00%) were unpaired; of these	11518478 (100.00%) were unpaired; of these	18101822 (100.00%) were unpaired; of these	23556759 (100.00%) were unpaired; of these	35799607 (100.00%) were unpaired; of these	23868984 (100.00%) were unpaired; of these	23718917 (100.00%) were unpaired; of these	34274545 (100.00%) were unpaired; of these	3543318 (100.00%) were unpaired; of these	17744254 (100.00%) were unpaired; of these	9288481 (100.00%) were unpaired; of these	10237567 (100.00%) were unpaired; of these	41359758 (100.00%) were unpaired; of these	22188057 (100.00%) were unpaired; of these	37070635 (100.00%) were unpaired; of these	38142100 (100.00%) were unpaired; of these	12931999 (100.00%) were unpaired; of these	26032717 (100.00%) were unpaired; of these	19323581 (100.00%) were unpaired; of these	19274405 (100.00%) were unpaired; of these	16652358 (100.00%) were unpaired; of these
6304951 (68.21%) aligned 0 times	4150578 (18.45%) aligned 0 times	1115613 (11.21%) aligned 0 times	2877855 (4.76%) aligned 0 times	1473705 (14.02%) aligned 0 times	1086736 (2.27%) aligned 0 times	391415 (3.08%) aligned 0 times	2597035 (18.88%) aligned 0 times	1777060 (15.43%) aligned 0 times	3367325 (27.37%) aligned 0 times	2030783 (10.57%) aligned 0 times	547053 (3.97%) aligned 0 times	468648 (4.27%) aligned 0 times	1458124 (9.78%) aligned 0 times	1230845 (10.08%) aligned 0 times	1353190 (8.92%) aligned 0 times	490728 (3.71%) aligned 0 times	766557 (6.05%) aligned 0 times	223500 (1.85%) aligned 0 times	2730005 (15.76%) aligned 0 times	3318502 (15.08%) aligned 0 times	1031174 (12.52%) aligned 0 times	434198 (3.54%) aligned 0 times	1037508 (9.11%) aligned 0 times	704781 (6.69%) aligned 0 times	3226066 (22.82%) aligned 0 times	15764388 (80.90%) aligned 0 times	5231615 (34.74%) aligned 0 times	1052596 (7.89%) aligned 0 times	1762728 (19.28%) aligned 0 times	579007 (5.03%) aligned 0 times	1804485 (9.97%) aligned 0 times	5078147 (21.56%) aligned 0 times	15110444 (42.21%) aligned 0 times	1489465 (6.24%) aligned 0 times	1431719 (6.04%) aligned 0 times	7075943 (20.64%) aligned 0 times	738773 (20.85%) aligned 0 times	5970130 (33.65%) aligned 0 times	160486 (1.73%) aligned 0 times	128479 (1.25%) aligned 0 times	5316017 (12.85%) aligned 0 times	2745974 (12.38%) aligned 0 times	848321 (2.29%) aligned 0 times	596128 (1.56%) aligned 0 times	3932489 (30.41%) aligned 0 times	5979929 (22.97%) aligned 0 times	1059342 (5.48%) aligned 0 times	5903822 (30.63%) aligned 0 times	3960109 (23.78%) aligned 0 times
2453011 (26.54%) aligned exactly 1 time	15140609 (67.30%) aligned exactly 1 time	7366115 (74.03%) aligned exactly 1 time	48333924 (79.92%) aligned exactly 1 time	7534298 (71.65%) aligned exactly 1 time	38969546 (81.34%) aligned exactly 1 time	10186315 (80.20%) aligned exactly 1 time	9319392 (67.75%) aligned exactly 1 time	8240405 (71.57%) aligned exactly 1 time	7426983 (60.36%) aligned exactly 1 time	14162533 (73.71%) aligned exactly 1 time	11046584 (80.25%) aligned exactly 1 time	8760656 (79.80%) aligned exactly 1 time	11582446 (77.65%) aligned exactly 1 time	9438378 (77.28%) aligned exactly 1 time	11765003 (77.55%) aligned exactly 1 time	10761804 (81.33%) aligned exactly 1 time	10103470 (79.76%) aligned exactly 1 time	9939001 (82.17%) aligned exactly 1 time	12459377 (71.91%) aligned exactly 1 time	16202648 (73.60%) aligned exactly 1 time	6211396 (75.43%) aligned exactly 1 time	9980670 (81.27%) aligned exactly 1 time	8825403 (77.49%) aligned exactly 1 time	8362050 (79.42%) aligned exactly 1 time	9352875 (66.16%) aligned exactly 1 time	3210755 (16.48%) aligned exactly 1 time	8457434 (56.16%) aligned exactly 1 time	10354298 (77.65%) aligned exactly 1 time	6255226 (68.43%) aligned exactly 1 time	9297314 (80.72%) aligned exactly 1 time	14259710 (78.77%) aligned exactly 1 time	16282299 (69.12%) aligned exactly 1 time	17871547 (49.92%) aligned exactly 1 time	18983782 (79.53%) aligned exactly 1 time	18783747 (79.19%) aligned exactly 1 time	23496437 (68.55%) aligned exactly 1 time	2334922 (65.90%) aligned exactly 1 time	9827550 (55.38%) aligned exactly 1 time	7659408 (82.46%) aligned exactly 1 time	8386867 (81.92%) aligned exactly 1 time	30239948 (73.11%) aligned exactly 1 time	16364615 (73.75%) aligned exactly 1 time	30342739 (81.85%) aligned exactly 1 time	31049926 (81.41%) aligned exactly 1 time	7555721 (58.43%) aligned exactly 1 time	16831217 (64.65%) aligned exactly 1 time	15289110 (79.12%) aligned exactly 1 time	11253714 (58.39%) aligned exactly 1 time	10729052 (64.43%) aligned exactly 1 time
485742 (5.25%) aligned >1 times	3205089 (14.25%) aligned >1 times	1468734 (14.76%) aligned >1 times	9263305 (15.32%) aligned >1 times	1506860 (14.33%) aligned >1 times	7850976 (16.39%) aligned >1 times	2124080 (16.72%) aligned >1 times	1839245 (13.37%) aligned >1 times	1496092 (12.99%) aligned >1 times	1510786 (12.28%) aligned >1 times	3020481 (15.72%) aligned >1 times	2171075 (15.77%) aligned >1 times	1748582 (15.93%) aligned >1 times	1875271 (12.57%) aligned >1 times	1543582 (12.64%) aligned >1 times	2052974 (13.53%) aligned >1 times	1979667 (14.96%) aligned >1 times	1796542 (14.18%) aligned >1 times	1933512 (15.98%) aligned >1 times	2137911 (12.34%) aligned >1 times	2491891 (11.32%) aligned >1 times	992180 (12.05%) aligned >1 times	1866250 (15.20%) aligned >1 times	1525496 (13.40%) aligned >1 times	1461608 (13.88%) aligned >1 times	1556890 (11.01%) aligned >1 times	510696 (2.62%) aligned >1 times	1369635 (9.10%) aligned >1 times	1927154 (14.45%) aligned >1 times	1123619 (12.29%) aligned >1 times	1642157 (14.26%) aligned >1 times	2037627 (11.26%) aligned >1 times	2196313 (9.32%) aligned >1 times	2817616 (7.87%) aligned >1 times	3395737 (14.23%) aligned >1 times	3503451 (14.77%) aligned >1 times	3702165 (10.80%) aligned >1 times	469623 (13.25%) aligned >1 times	1946574 (10.97%) aligned >1 times	1468587 (15.81%) aligned >1 times	1722221 (16.82%) aligned >1 times	5803793 (14.03%) aligned >1 times	3077468 (13.87%) aligned >1 times	5879575 (15.86%) aligned >1 times	6496046 (17.03%) aligned >1 times	1443789 (11.16%) aligned >1 times	3221571 (12.38%) aligned >1 times	2975129 (15.40%) aligned >1 times	2116869 (10.98%) aligned >1 times	1963197 (11.79%) aligned >1 times
31.79% overall alignment rate	81.55% overall alignment rate	88.79% overall alignment rate	95.24% overall alignment rate	85.98% overall alignment rate	97.73% overall alignment rate	96.92% overall alignment rate	81.12% overall alignment rate	84.57% overall alignment rate	72.63% overall alignment rate	89.43% overall alignment rate	96.03% overall alignment rate	95.73% overall alignment rate	90.22% overall alignment rate	89.92% overall alignment rate	91.08% overall alignment rate	96.29% overall alignment rate	93.95% overall alignment rate	98.15% overall alignment rate	84.24% overall alignment rate	84.92% overall alignment rate	87.48% overall alignment rate	96.46% overall alignment rate	90.89% overall alignment rate	93.31% overall alignment rate	77.18% overall alignment rate	19.10% overall alignment rate	65.26% overall alignment rate	92.11% overall alignment rate	80.72% overall alignment rate	94.97% overall alignment rate	90.03% overall alignment rate	78.44% overall alignment rate	57.79% overall alignment rate	93.76% overall alignment rate	93.96% overall alignment rate	79.36% overall alignment rate	79.15% overall alignment rate	66.35% overall alignment rate	98.27% overall alignment rate	98.75% overall alignment rate	87.15% overall alignment rate	87.62% overall alignment rate	97.71% overall alignment rate	98.44% overall alignment rate	69.59% overall alignment rate	77.03% overall alignment rate	94.52% overall alignment rate	69.37% overall alignment rate	76.22% overall alignment rate
[truncated: 18 more columns]

## Sheet: Hi-C
GEO	GEO label	strain	stage	seqID
GSM6241146	N2_emb_rep1 [DJ73]	N2	Embryo	DJ73
GSM6241147	N2_emb_rep2 [DJ74]	N2	Embryo	DJ74
GSM6241148	N2_L3_rep1 [JK15]	N2	L3	JK15
GSM6241149	N2_L3_rep2_1 [JK89]	N2	L3	JK89
GSM6241150	N2_L3_rep2_2 [JK90]	N2	L3	JK90
GSM6241151	ypT47_L3_rep1 [JK85]	ypT47 (XV)	L3	JK85
GSM6241152	ypT47_L3_rep2 [JK103]	ypT47 (XV)	L3	JK103
GSM6241153	ERC69_emb_rep1_1 [DJ65_1]	ERC69 (rex-8 in X); ersIs33[X:11093924-11094281[rex-8], X:14373128]	Embryo	DJ65_1
GSM6241154	ERC69_emb_rep1_2 [DJ65_2]	ERC69 (rex-8 in X); ersIs33[X:11093924-11094281[rex-8], X:14373128]	Embryo	DJ65_2
GSM6241155	ERC69_emb_rep2_1 [DJ66_1]	ERC69 (rex-8 in X); ersIs33[X:11093924-11094281[rex-8], X:14373128]	Embryo	DJ66_1
GSM6241156	ERC69_emb_rep2_2 [DJ66_2]	ERC69 (rex-8 in X); ersIs33[X:11093924-11094281[rex-8], X:14373128]	Embryo	DJ66_2
GSM6241157	ERC80_emb_rep1_1 [DJ61_1]	ERC80 (rex-8flip in X); ersIs52[X:11094281-11093924[rex-8reverse], X:14373128]	Embryo	DJ61_1
GSM6241158	ERC80_emb_rep1_2 [DJ61_2]	ERC80 (rex-8flip in X); ersIs52[X:11094281-11093924[rex-8reverse], X:14373128]	Embryo	DJ61_2
GSM6241159	ERC80_emb_rep2 [DJ68]	ERC80 (rex-8flip in X); ersIs52[X:11094281-11093924[rex-8reverse], X:14373128]	Embryo	DJ68
GSM6241160	ERC80_emb_rep3 [DJ69]	ERC80 (rex-8flip in X); ersIs52[X:11094281-11093924[rex-8reverse], X:14373128]	Embryo	DJ69
GSM6241161	ERC61_L3_rep1 [JK51]	ERC61 (rex-8 in II); ersSi25[wt400bp_rex8, cb-unc-119(+)] II; unc-119(ed3) III	L3	JK51
GSM6241162	ERC61_L3_rep2 [JK52]	ERC61 (rex-8 in II); ersSi25[wt400bp_rex8, cb-unc-119(+)] II; unc-119(ed3) III	L3	JK52
GSM6241163	ERC63_L3_rep1_1 [JK19_1]	ERC63 (rex-8,rex-1,rex-8 in II); ersIs27[X:11093923-11094322[rex-8], II:8371600, II:8449968); knuSi254[SNP400bprex-1, unc-119(+)] II; unc-119(ed3) III	L3	JK19_1
GSM6241164	ERC63_L3_rep1_2 [JK19_2]	ERC63 (rex-8,rex-1,rex-8 in II); ersIs27[X:11093923-11094322[rex-8], II:8371600, II:8449968); knuSi254[SNP400bprex-1, unc-119(+)] II; unc-119(ed3) III	L3	JK19_2
GSM6241165	ERC63_L3_rep2 [JK53]	ERC63 (rex-8,rex-1,rex-8 in II); ersIs27[X:11093923-11094322[rex-8], II:8371600, II:8449968); knuSi254[SNP400bprex-1, unc-119(+)] II; unc-119(ed3) III	L3	JK53
GSM6241166	ERC90_L3_rep1 [JK102]	ERC90 (super rex in II); ersIs62[superrex(rex40,rex8,rex35)x2],II:8420106]	L3	JK102
GSM6241167	ERC90_L3_rep2 [JK123]	ERC90 (super rex in II); ersIs62[superrex(rex40,rex8,rex35)x2],II:8420106]	L3	JK123
GSM6241168	JZ2005_emb_rep1 [DJ70]	JZ2005 (dcas9 suntag, sgRNA); pySi[Pfib-1:NLS:scFv:sfGFP/unc-119(+) ] I; pySi[Pfib-1:NLS:dCas9:24xGCN4/unc-119(+) ] II; unc-119(ed3)?III; pyIs(pU6:sgRNA-X227/Punc-122:mcherry).	Embryo	DJ70
GSM6241169	JZ2005_emb_rep2 [DJ87]	JZ2005 (dcas9 suntag, sgRNA); pySi[Pfib-1:NLS:scFv:sfGFP/unc-119(+) ] I; pySi[Pfib-1:NLS:dCas9:24xGCN4/unc-119(+) ] II; unc-119(ed3)?III; pyIs(pU6:sgRNA-X227/Punc-122:mcherry).	Embryo	DJ87

## Sheet: Hi-C statistics
	DJ73	DJ74	JK15	JK89	JK90	JK85	JK103	DJ65_1	DJ65_2	DJ66_1	DJ66_2	DJ61_1	DJ61_2	DJ68	DJ69	JK51	JK52	JK19_1	JK19_2	JK53	JK102	JK123	DJ70	DJ87
Sequenced Read Pairs	342186330	257157731	254696570	101940064	139075556	316112440	161552763	143873412	136275965	135396752	125859686	26280866	548024020	151443165	112355644	285632258	202042792	116602571	153207279	264257998	205393399	273226460	134070664	263375384
Normal Paired	239,872,897 (70.10%)	178,818,216 (69.54%)	172,175,525 (67.60%)	73,792,075 (72.39%)	103,986,136 (74.77%)	201,382,141 (63.71%)	115,108,220 (71.25%)	90052420 (62.59%)	94,013,467 (68.99%)	80,237,849 (59.26%)	84,886,020 (67.44%)	22,392,561 (85.20%)	360,987,213 (65.87%)	91,711,183 (60.56%)	69,740,422 (62.07%)	191,629,329 (67.09%)	139,644,041 (69.12%)	79,445,842 (68.13%)	102,023,592 (66.59%)	173,849,836 (65.79%)	147,478,369 (71.80%)	181,020,356 (66.25%)	85,010,230 (63.41%)	148,910,259 (56.54%)
Chimeric Paired	89,808,404 (26.25%)	68,109,194 (26.49%)	70,603,485 (27.72%)	23,318,961 (22.88%)	26,176,001 (18.82%)	96,553,882 (30.54%)	41,106,766 (25.44%)	47091272 (32.73%)	36,106,306 (26.49%)	47,345,420 (34.97%)	34,562,604 (27.46%)	3,215,707 (12.24%)	159,860,050 (29.17%)	50,598,618 (33.41%)	36,406,208 (32.40%)	81,271,565 (28.45%)	52,000,044 (25.74%)	31,861,664 (27.33%)	43,661,589 (28.50%)	77,626,378 (29.38%)	51,209,319 (24.93%)	81,191,183 (29.72%)	36,007,666 (26.86%)	88,146,097 (33.47%)
Chimeric Ambiguous	10,779,586 (3.15%)	9,058,119 (3.52%)	9,127,605 (3.58%)	3,021,978 (2.96%)	5,501,406 (3.96%)	12,830,131 (4.06%)	4,452,734 (2.76%)	5291287 (3.68%)	5,199,073 (3.82%)	5,842,421 (4.32%)	5,156,785 (4.10%)	497,268 (1.89%)	22,791,941 (4.16%)	6,940,505 (4.58%)	4,446,987 (3.96%)	9,401,467 (3.29%)	7,589,641 (3.76%)	4,361,210 (3.74%)	5,566,195 (3.63%)	9,927,157 (3.76%)	5,392,548 (2.63%)	8,768,165 (3.21%)	3,661,171 (2.73%)	8,192,227 (3.11%)
Unmapped	1,725,443 (0.50%)	1,172,202 (0.46%)	2,789,955 (1.10%)	1,807,050 (1.77%)	3,412,013 (2.45%)	5,346,286 (1.69%)	885,043 (0.55%)	1438433 (1.00%)	957,119 (0.70%)	1,971,062 (1.46%)	1,254,277 (1.00%)	175,330 (0.67%)	4,384,816 (0.80%)	2,192,859 (1.45%)	1,762,027 (1.57%)	3,329,897 (1.17%)	2,809,066 (1.39%)	933,855 (0.80%)	1,955,903 (1.28%)	2,854,627 (1.08%)	1,313,163 (0.64%)	2,246,756 (0.82%)	9,391,597 (7.00%)	18,126,801 (6.88%)
Ligation Motif Present	107,137,167 (31.31%)	80,858,568 (31.44%)	71,682,178 (28.14%)	8,610,123 (8.45%)	6,906,350 (4.97%)	106,916,946 (33.82%)	12,128,647 (7.51%)	47557041 (33.05%)	38,528,382 (28.27%)	46,184,354 (34.11%)	36,239,765 (28.79%)	5,967,037 (22.70%)	169,700,281 (30.97%)	56,170,189 (37.09%)	41,247,509 (36.71%)	90,546,470 (31.70%)	57,017,933 (28.22%)	33,914,086 (29.09%)	46,131,264 (30.11%)	82,592,885 (31.25%)	14,081,340 (6.86%)	26,906,617 (9.85%)	44,041,686 (32.85%)	102,572,095 (38.95%)
Alignable (Normal+Chimeric Paired)	329,681,301 (96.35%)	246,927,410 (96.02%)	242,779,010 (95.32%)	97,111,036 (95.26%)	130,162,137 (93.59%)	297,936,023 (94.25%)	156,214,986 (96.70%)	137143692 (95.32%)	130,119,773 (95.48%)	127,583,269 (94.23%)	119,448,624 (94.91%)	25,608,268 (97.44%)	520,847,263 (95.04%)	142,309,801 (93.97%)	106,146,630 (94.47%)	272,900,894 (95.54%)	191,644,085 (94.85%)	111,307,506 (95.46%)	145,685,181 (95.09%)	251,476,214 (95.16%)	198,687,688 (96.74%)	262,211,539 (95.97%)	121,017,896 (90.26%)	237,056,356 (90.01%)
Unique Reads	251,284,329 (73.43%)	198,705,875 (77.27%)	208,656,567 (81.92%)	91,711,994 (89.97%)	84,158,003 (60.51%)	263,291,481 (83.29%)	134,166,561 (83.05%)	57,338,241 (39.85%)	114,516,192 (84.03%)	52,904,638 (39.07%)	105,380,718 (83.73%)	25,027,683 (95.23%)	424,258,107 (77.42%)	59,839,475 (39.51%)	50,127,568 (44.62%)	236,746,461 (82.89%)	170,900,039 (84.59%)	95,232,612 (81.67%)	128,198,970 (83.68%)	222,842,355 (84.33%)	167,723,121 (81.66%)	221,164,521 (80.95%)	99,285,590 (74.05%)	80,214,356 (30.46%)
PCR Duplicates	75,506,891 (22.07%)	46,588,616 (18.12%)	31,308,378 (12.29%)	5,112,443 (5.02%)	45,744,760 (32.89%)	32,697,236 (10.34%)	20,984,277 (12.99%)	56,783,196 (39.47%)	14,594,589 (10.71%)	49,286,910 (36.40%)	13,033,793 (10.36%)	524,478 (2.00%)	93,523,460 (17.07%)	56,290,876 (37.17%)	34,814,061 (30.99%)	32,889,160 (11.51%)	18,822,522 (9.32%)	14,746,119 (12.65%)	15,864,401 (10.35%)	26,188,724 (9.91%)	29,623,866 (14.42%)	38,790,739 (14.20%)	21,025,331 (15.68%)	155,641,425 (59.09%)
Optical Duplicates	2,890,081 (0.84%)	1,632,919 (0.63%)	2,814,065 (1.10%)	286,599 (0.28%)	259,374 (0.19%)	1,947,306 (0.62%)	1,064,148 (0.66%)	23,022,255 (16.00%)	1,008,992 (0.74%)	25,391,721 (18.75%)	1,034,113 (0.82%)	56,107 (0.21%)	3,065,696 (0.56%)	26,179,450 (17.29%)	21,205,001 (18.87%)	3,265,273 (1.14%)	1,921,524 (0.95%)	1,328,775 (1.14%)	1,621,810 (1.06%)	2,445,135 (0.93%)	1,340,701 (0.65%)	2,256,279 (0.83%)	706,975 (0.53%)	1,200,575 (0.46%)
Library Complexity Estimate	593432184	561098104	837752514	884310732	137972391	1239110271	520591855	72200612	527187513	68078606	497667772	613893875	1254958425	76731759	72785062	1013443370	891813237	372575595	605155659	1099477067	589764104	782044655	302825759	85675587
Intra-fragment Reads	11,624,186 (3.40% / 4.63%)	9,290,175 (3.61% / 4.68%)	4,013,086 (1.58% / 1.92%)	148,795 (0.15% / 0.16%)	562,252 (0.40% / 0.67%)	1,544,406 (0.49% / 0.59%)	1,199,713 (0.74% / 0.89%)	4,318,483 (3.00% / 7.53%)	7,535,832 (5.53% / 6.58%)	2,891,904 (2.14% / 5.47%)	5,002,022 (3.97% / 4.75%)	654,357 (2.49% / 2.61%)	10,621,928 (1.94% / 2.50%)	2,775,098 (1.83% / 4.64%)	1,637,753 (1.46% / 3.27%)	3,302,164 (1.16% / 1.39%)	2,421,702 (1.20% / 1.42%)	1,123,651 (0.96% / 1.18%)	1,570,585 (1.03% / 1.23%)	1,945,436 (0.74% / 0.87%)	1,914,000 (0.93% / 1.14%)	439,719 (0.16% / 0.20%)	8,613,147 (6.42% / 8.68%)	2,704,594 (1.03% / 3.37%)
Below MAPQ Threshold	35,700,013 (10.43% / 14.21%)	27,559,117 (10.72% / 13.87%)	27,765,857 (10.90% / 13.31%)	12,336,100 (12.10% / 13.45%)	13,516,252 (9.72% / 16.06%)	35,177,026 (11.13% / 13.36%)	19,447,962 (12.04% / 14.50%)	9,745,211 (6.77% / 17.00%)	15,602,071 (11.45% / 13.62%)	8,951,814 (6.61% / 16.92%)	14,035,066 (11.15% / 13.32%)	3,801,414 (14.46% / 15.19%)	61,101,274 (11.15% / 14.40%)	10,799,155 (7.13% / 18.05%)	8,713,779 (7.76% / 17.38%)	31,498,476 (11.03% / 13.30%)	23,082,626 (11.42% / 13.51%)	12,713,070 (10.90% / 13.35%)	16,883,158 (11.02% / 13.17%)	30,237,496 (11.44% / 13.57%)	24,346,339 (11.85% / 14.52%)	31,514,261 (11.53% / 14.25%)	13,391,654 (9.99% / 13.49%)	15,830,194 (6.01% / 19.73%)
Hi-C Contacts	203,960,130 (59.60% / 81.17%)	161,856,583 (62.94% / 81.46%)	176,877,624 (69.45% / 84.77%)	79,227,099 (77.72% / 86.39%)	70,079,499 (50.39% / 83.27%)	226,570,049 (71.67% / 86.05%)	113,518,886 (70.27% / 84.61%)	43,274,547 (30.08% / 75.47%)	91,378,289 (67.05% / 79.80%)	41,060,920 (30.33% / 77.61%)	86,343,630 (68.60% / 81.93%)	20,571,912 (78.28% / 82.20%)	352,534,905 (64.33% / 83.09%)	46,265,222 (30.55% / 77.32%)	39,776,036 (35.40% / 79.35%)	201,945,821 (70.70% / 85.30%)	145,395,711 (71.96% / 85.08%)	81,395,891 (69.81% / 85.47%)	109,745,227 (71.63% / 85.61%)	190,659,423 (72.15% / 85.56%)	141,462,782 (68.87% / 84.34%)	189,210,541 (69.25% / 85.55%)	77,280,789 (57.64% / 77.84%)	61,679,568 (23.42% / 76.89%)
Ligation Motif Present	48,906,863 (14.29% / 19.46%)	39,090,163 (15.20% / 19.67%)	37,256,267 (14.63% / 17.86%)	5,309,427 (5.21% / 5.79%)	2,560,708 (1.84% / 3.04%)	56,025,063 (17.72% / 21.28%)	6,707,732 (4.15% / 5.00%)	10,645,312 (7.40% / 18.57%)	20,453,038 (15.01% / 17.86%)	10,217,619 (7.55% / 19.31%)	19,234,818 (15.28% / 18.25%)	4,107,812 (15.63% / 16.41%)	80,702,856 (14.73% / 19.02%)	12,708,724 (8.39% / 21.24%)	10,646,561 (9.48% / 21.24%)	47,616,541 (16.67% / 20.11%)	30,625,118 (15.16% / 17.92%)	17,761,929 (15.23% / 18.65%)	24,687,497 (16.11% / 19.26%)	43,957,536 (16.63% / 19.73%)	7,718,059 (3.76% / 4.60%)	14,306,974 (5.24% / 6.47%)	20,528,120 (15.31% / 20.68%)	17,809,522 (6.76% / 22.20%)
3' Bias (Long Range)	68% - 32%	68% - 32%	59% - 41%	51% - 49%	49% - 51%	61% - 39%	51% - 49%	71% - 29%	69% - 31%	69% - 31%	67% - 33%	69% - 31%	69% - 31%	70% - 30%	70% - 30%	58% - 42%	56% - 44%	58% - 42%	58% - 42%	58% - 42%	51% - 49%	52% - 48%	71% - 29%	69% - 31%
Pair Type %(L-I-O-R)	25% - 25% - 25% - 25%	25% - 25% - 25% - 25%	25% - 25% - 25% - 25%	25% - 25% - 25% - 25%	25% - 25% - 25% - 25%	25% - 25% - 25% - 25%	25% - 25% - 25% - 25%	25% - 25% - 25% - 25%	25% - 25% - 25% - 25%	25% - 25% - 25% - 25%	25% - 25% - 25% - 25%	25% - 25% - 25% - 25%	25% - 25% - 25% - 25%	25% - 25% - 25% - 25%	25% - 25% - 25% - 25%	25% - 25% - 25% - 25%	25% - 25% - 25% - 25%	25% - 25% - 25% - 25%	25% - 25% - 25% - 25%	25% - 25% - 25% - 25%	25% - 25% - 25% - 25%	25% - 25% - 25% - 25%	25% - 25% - 25% - 25%	25% - 25% - 25% - 25%
Inter-chromosomal	41,441,365 (12.11% / 16.49%)	28,294,480 (11.00% / 14.24%)	11,469,565 (4.50% / 5.50%)	5,141,239 (5.04% / 5.61%)	4,733,768 (3.40% / 5.62%)	9,914,939 (3.14% / 3.77%)	4,947,090 (3.06% / 3.69%)	9,042,968 (6.29% / 15.77%)	19,412,007 (14.24% / 16.95%)	6,030,439 (4.45% / 11.40%)	12,904,880 (10.25% / 12.25%)	4,557,158 (17.34% / 18.21%)	81,767,554 (14.92% / 19.27%)	12,968,578 (8.56% / 21.67%)	12,815,223 (11.41% / 25.57%)	8,485,522 (2.97% / 3.58%)	6,873,889 (3.40% / 4.02%)	3,284,992 (2.82% / 3.45%)	4,423,899 (2.89% / 3.45%)	9,670,473 (3.66% / 4.34%)	7,216,212 (3.51% / 4.30%)	8,994,736 (3.29% / 4.07%)	16,630,055 (12.40% / 16.75%)	11,886,697 (4.51% / 14.82%)
Intra-chromosomal	162,518,765 (47.49% / 64.68%)	133,562,103 (51.94% / 67.22%)	165,408,059 (64.94% / 79.27%)	74,085,860 (72.68% / 80.78%)	65,345,731 (46.99% / 77.65%)	216,655,110 (68.54% / 82.29%)	108,571,796 (67.21% / 80.92%)	34,231,579 (23.79% / 59.70%)	71,966,282 (52.81% / 62.84%)	35,030,481 (25.87% / 66.21%)	73,438,750 (58.35% / 69.69%)	16,014,754 (60.94% / 63.99%)	270,767,351 (49.41% / 63.82%)	33,296,644 (21.99% / 55.64%)	26,960,813 (24.00% / 53.78%)	193,460,299 (67.73% / 81.72%)	138,521,822 (68.56% / 81.05%)	78,110,899 (66.99% / 82.02%)	105,321,328 (68.74% / 82.15%)	180,988,950 (68.49% / 81.22%)	134,246,570 (65.36% / 80.04%)	180,215,805 (65.96% / 81.48%)	60,650,734 (45.24% / 61.09%)	49,792,871 (18.91% / 62.07%)
Short Range (<20Kb)	64,533,161 (18.86% / 25.68%)	51,769,969 (20.13% / 26.05%)	51,467,348 (20.21% / 24.67%)	28,530,817 (27.99% / 31.11%)	29,179,648 (20.98% / 34.67%)	75,515,009 (23.89% / 28.68%)	45,000,931 (27.86% / 33.54%)	11,427,433 (7.94% / 19.93%)	22,246,429 (16.32% / 19.43%)	11,429,033 (8.44% / 21.60%)	22,163,474 (17.61% / 21.03%)	4,772,045 (18.16% / 19.07%)	68,390,763 (12.48% / 16.12%)	13,676,671 (9.03% / 22.86%)	11,727,351 (10.44% / 23.40%)	69,963,603 (24.49% / 29.55%)	46,618,710 (23.07% / 27.28%)	30,507,495 (26.16% / 32.03%)	41,033,212 (26.78% / 32.01%)	59,791,687 (22.63% / 26.83%)	58,065,886 (28.27% / 34.62%)	68,228,921 (24.97% / 30.85%)	26,373,832 (19.67% / 26.56%)	20,383,485 (7.74% / 25.41%)
Long Range (>20Kb)	97,983,943 (28.63% / 38.99%)	81,790,997 (31.81% / 41.16%)	113,940,040 (44.74% / 54.61%)	45,553,834 (44.69% / 49.67%)	36,163,310 (26.00% / 42.97%)	141,139,112 (44.65% / 53.61%)	63,570,298 (39.35% / 47.38%)	22,804,055 (15.85% / 39.77%)	49,719,606 (36.48% / 43.42%)	23,601,356 (17.43% / 44.61%)	51,275,000 (40.74% / 48.66%)	11,242,674 (42.78% / 44.92%)	202,376,020 (36.93% / 47.70%)	19,619,848 (12.96% / 32.79%)	15,233,310 (13.56% / 30.39%)	123,495,513 (43.24% / 52.16%)	91,901,790 (45.49% / 53.78%)	47,602,828 (40.82% / 49.99%)	64,287,390 (41.96% / 50.15%)	121,196,084 (45.86% / 54.39%)	76,180,000 (37.09% / 45.42%)	111,985,831 (40.99% / 50.63%)	34,276,541 (25.57% / 34.52%)	29,408,791 (11.17% / 36.66%)

## Sheet: RNA-seq
mRNA-seq
GEO accession number	Sequencing ID	Description	Strain	Stage	Mapped reads	Referred as in paper
GSM5170239	MK146	COP325_emb_RNA_rep1	ERC08	mixed embryo	7404574	8 rex insertion
GSM5170240	MK163	COP325_emb_RNA_rep2	ERC08	mixed embryo	5925133	8 rex insertion
GSM5170241	MK164	COP325_emb_RNA_rep3	ERC08	mixed embryo	9926264	8 rex insertion
GSM5170242	SEA226	LS01_emb_RNA_rep1	ERC63	mixed embryo	6149777	3 rex insertion
GSM5170243	SEA227	LS01_emb_RNA_rep2	ERC63	mixed embryo	7087411	3 rex insertion
GSM5170244	LAS42	LS01_emb_RNA_rep3	ERC63	mixed embryo	21866217	3 rex insertion
Published RNA-seq data used in this study
GEO accession number	Strain	Description	Stage	Reference
GSE67650	N2	wild type	mixed embryo	Kramer et al PLoS Gen 2015

## Sheet: TPM_Replicates
Feature	locus	N2_emb_rep1_MK41MK62MK74-counts	N2_emb_rep2_MK42MK63MK75-counts	N2_emb_rep3_SEA36-counts	N2_emb_rep4_SEA37-counts	N2_emb_rep5_SEA38-counts	N2_emb_rep6_SEA48-counts	N2_emb_rep7_SEA61-counts	LS01_emb_rep3_LAS42-counts	LS01_emb_rep1_SEA226-counts	LS01_emb_rep2_SEA227-counts	COP325_emb_rep1_MK146-counts	COP325_emb_rep2_MK163-counts	COP325_emb_rep3_MK164-counts
2L52.1	CHROMOSOME_II:1866-4663	23.6623	22.1929	23.5406	17.0207	35.7857	32.1028	32.6572	57.389	26.7448	37.6312	25.9709	44.0027	47.432
2RSSE.1	CHROMOSOME_II:15268135-15273238	73.3225	63.1096	174.093	151.606	132.699	167.8	138.027	132.547	96.1376	128.685	122.856	135.575	131.941
2RSSE.2	CHROMOSOME_II:15274314-15275613	35.8205	41.0223	129.666	103.541	94.5995	103.391	80.0822	94.9657	70.3846	110.762	99.5812	99.9632	89.4495
3R5.1	CHROMOSOME_III:13777588-13781032	5.52444	4.91487	4.64808	3.49044	4.25396	3.86212	5.02971	5.96972	5.09942	5.94779	5.83487	7.70845	7.44692
4R79.1	CHROMOSOME_IV:17486945-17490461	0	0	3.62995	5.24232	10.3844	11.6065	0.845846	6.01523	7.90957	9.16123	7.7003	4.67773	6.33215
4R79.2	CHROMOSOME_IV:17480359-17483294	0	0	0.72076	1.41667	0.915571	2.62142	0.094826	1.15849	1.51023	0.579904	1.56788	1.20746	0.252716
6R55.2	CHROMOSOME_X:17714379-17714756	0	0	0.896092	1.81169	0.700092	0	1.41409	0	0	1.53956	1.45819	0	0
AC3.1	CHROMOSOME_V:10368532-10369845	0.63839	0.651473	0.0997513	0.30251	0.233798	0	0.419771	0.229593	0.191218	0	0.162323	0	0.419516
AC3.10	CHROMOSOME_V:10384133-10385688	0	0	0.0844931	0.256238	0.0660122	0.273023	0.133336	0.291504	0.161854	0	0	0	0
AC3.2	CHROMOSOME_V:10372117-10374238	15.7346	18.1904	6.1443	4.06939	6.82813	6.58952	11.9809	15.1757	9.52368	13.0426	5.43022	13.3623	13.96
AC3.3	CHROMOSOME_V:10380315-10381800	0.0575008	0	0.467205	1.93587	3.3413	7.40741	0.207951	0.72285	1.65128	0.653889	1.40359	0.882562	1.00764
AC3.4	CHROMOSOME_V:10382418-10383953	0.0621118	0	0.349387	1.46321	2.57802	6.24521	0.224627	0.290095	1.18946	0.4496	1.1371	0.78	1.19729
AC3.5	CHROMOSOME_V:10388446-10393480	0.104417	0.0456659	0.504353	0.339269	0.786682	1.71722	0.193913	0.304552	0.480935	0.130372	2.05685	2.37281	0.707043
AC3.6	CHROMOSOME_V:10393507-10395209	0.117406	0.539157	0	0.333809	0.257988	0.355675	0.2895	0.190102	0.422209	0.547166	0.179117	0	0.154308
AC3.7	CHROMOSOME_V:10395653-10397794	2.98886	3.4236	1.48684	0.751513	1.8318	0.646752	1.89512	2.95565	1.64108	2.07952	1.30281	2.29801	1.92404
AC3.8	CHROMOSOME_V:10398786-10401290	0	0.0316273	0.348671	0.41121	1.18043	1.03277	0.458521	1.03458	0.555906	1.44086	2.55323	1.42706	0.814658
AC7.1	CHROMOSOME_IV:5112920-5122011	0	0	0.24507	0.265613	0.54742	1.69806	0.214854	0.654789	0.312927	0	0.855129	0.391037	0.122767
AC7.2	CHROMOSOME_IV:5126997-5145802	9.30796	9.23027	49.3417	44.4622	60.0329	72.201	34.4717	45.3656	38.2885	47.8371	51.461	64.9404	61.7964
AC7.3	CHROMOSOME_IV:5111677-5112867	0.0819385	0.0836177	0.460916	0.155311	0	0	0	0	0	0	0	0	0
AC8.10	CHROMOSOME_X:237495-239177	0.844296	1.51305	3.78398	2.45904	3.80099	3.68064	4.42776	2.33043	1.18304	2.1081	4.96377	6.37885	4.00558
AC8.11	CHROMOSOME_X:236066-236810	1.73665	2.18923	4.78865	3.38854	6.58459	5.26104	8.41327	3.54222	2.21262	4.14191	6.70153	8.76628	6.4446
AC8.12	CHROMOSOME_X:239848-240779	1.84444	2.99227	5.23195	2.95819	3.46405	4.72796	14.2737	4.25061	5.4595	4.86428	5.91639	7.32488	3.35649
AC8.3	CHROMOSOME_X:228079-229761	0.844296	1.51305	3.78398	2.45904	3.80099	3.68064	4.42776	2.33043	1.18304	2.1081	4.96377	6.37885	4.00558
AC8.4	CHROMOSOME_X:226650-227394	1.73665	2.18923	4.78865	3.38854	6.58459	5.26104	8.41327	3.54222	2.21262	4.14191	6.70153	8.76628	6.4446
AC8.7	CHROMOSOME_X:230432-231363	1.84444	2.99227	5.23195	2.95819	3.46405	4.72796	14.2737	4.25061	5.4595	4.86428	5.91639	7.32488	3.35649
AH10.1	CHROMOSOME_V:14146493-14148769	1.03383	0.602868	0.332312	0.055988	0	0	0.0874017	0.0636071	0.211902	0	0.0901272	0	0.232931
AH10.2	CHROMOSOME_V:14156815-14157607	12.4819	8.6968	3.22817	1.46849	1.13494	2.08624	2.97166	1.95606	0.930925	1.3405	0.78797	1.08102	3.16786
AH10.3	CHROMOSOME_V:14144014-14145396	0.384176	0.261366	10.0849	11.4083	22.6991	24.8284	7.95731	15.716	9.73003	12.4096	16.0202	4.82449	15.1476
AH10.4	CHROMOSOME_V:14137332-14137845	0	0.189604	0	0	0	1.12575	0.43474	1.23689	0	0	0.566906	0	0
AH6.1	CHROMOSOME_II:9512430-9516877	0	0	0	0	0	0.0433741	0	0.0153952	0	0.0664671	0	0	0
AH6.10	CHROMOSOME_II:9548345-9549639	0	0	0	0.352005	0	0.281297	0	0.100125	0	0	0.14166	0.194346	0
AH6.11	CHROMOSOME_II:9544625-9546148	0	0	0	0	0.0856677	0	0	0	0	0	0	0	0
AH6.12	CHROMOSOME_II:9537668-9539025	0	0	0	0	0	0	0	0	0	0	0	0	0
AH6.14	CHROMOSOME_II:9532238-9533914	0.0464745	0	0	0	0	0	0	0	0	0	0.141804	0	0
AH6.2	CHROMOSOME_II:9517508-9518837	0.106893	0	0	0	0	0	0	0	0	0	0.163077	0	0
AH6.3	CHROMOSOME_II:9519036-9520151	0.313234	0	0.440496	0.14843	0	0	0	0.084676	0	0	0	0	0
AH6.4	CHROMOSOME_II:9520140-9521611	0.103639	0.211526	0.0971641	0.0982218	0.0759116	0.156984	0	0.055903	0	0	0	0	0.136213
AH6.5	CHROMOSOME_II:9524112-9526307	385.666	310.055	93.9865	41.8784	59.2894	82.9678	109.251	74.7657	109.559	70.9501	63.1892	79.3337	134.031
AH6.6	CHROMOSOME_II:9528719-9529802	0	0	0	0	0	0	0	0	0	0	0	0	0
AH6.7	CHROMOSOME_II:9539210-9540763	0	0	0	0.104215	0	0	0	0	0	0	0.50328	0	0
AH6.8	CHROMOSOME_II:9541540-9542825	0	0	0	0	0	0	0	0	0	0	0	0.2277	0
AH9.1	CHROMOSOME_X:2243225-2247000	0.755084	0.904569	0.554016	0.497818	1.00995	0.994553	0.453328	0.848588	0	0.610616	1.30222	0.137426	0.86296
AH9.2	CHROMOSOME_X:2255839-2258073	32.4965	28.2329	9.14902	4.25436	6.29014	6.2083	11.4058	11.1038	12.272	10.1484	7.29513	10.2125	14.1084
AH9.3	CHROMOSOME_X:2259143-2260518	75.4922	89.527	54.6799	42.6968	74.4701	59.941	74.2191	108.324	95.9117	109.351	55.9141	85.119	85.6164
AH9.4	CHROMOSOME_X:2271016-2274329	0.158491	0.202174	0.371473	0.600825	0.638488	1.08031	0.117242	0.725891	0.2845	0.1229	0.60449	0.497583	0.416609
AH9.6	CHROMOSOME_X:2263167-2267464	0	0	3.3607	3.50687	5.25125	10.6843	0.798365	3.0579	4.98963	2.33508	7.23294	2.17821	3.95141
AH9.7	CHROMOSOME_X:2243144-2244459	1.3885	2.16271	1.37026	1.10814	0.749382	2.43525	1.65781	2.84344	2.89445	2.72807	1.33788	1.52954	2.11303
B0001.1	CHROMOSOME_IV:12129481-12135073	33.1805	34.3349	78.5588	74.127	109.302	98.4056	53.7037	78.2786	73.1352	89.1841	95.0356	90.4878	84.4686
B0001.2	CHROMOSOME_IV:12146458-12150953	13.1956	10.3048	5.89676	3.66514	6.18585	6.28869	5.71552	11.0207	7.90743	7.89547	4.37871	8.0177	12.3655
B0001.3	CHROMOSOME_IV:12143408-12145709	20.6277	20.3277	19.3908	16.3525	25.4077	27.7558	30.2553	28.8526	18.8924	30.2182	20.5633	23.5115	31.689
B0001.4	CHROMOSOME_IV:12135057-12137325	54.5138	55.0763	36.327	29.1343	37.5038	34.5863	45.1885	34.1695	55.4072	49.4048	39.0575	40.7565	54.5637
B0001.5	CHROMOSOME_IV:12141137-12143309	27.4767	30.7588	25.656	19.6224	31.4285	27.2417	34.3003	28.8026	22.1968	23.2193	21.5945	25.6757	28.2335
B0001.6	CHROMOSOME_IV:12156815-12164252	71.8769	77.4677	119.55	88.8236	164.224	141.705	151.01	104.618	78.3149	96.1662	133.967	165.192	156.852
B0001.7	CHROMOSOME_IV:12150035-12154220	48.6647	42.2545	11.8435	4.71601	8.58701	9.90228	15.6835	13.5223	14.8993	12.7045	9.41712	19.6211	29.7884
B0001.8	CHROMOSOME_IV:12138822-12141036	55.8678	45.8991	26.6295	13.8519	23.0422	21.1621	26.323	25.4001	26.5078	25.884	18.3842	32.0995	35.665
B0019.1	CHROMOSOME_I:12759575-12764950	0.597718	0.544614	7.00468	7.52601	11.5393	12.3842	9.3063	5.55822	5.89171	4.29699	9.44453	6.61256	7.01409
B0019.2	CHROMOSOME_I:12773646-12782247	24.2359	25.0307	12.4076	7.8921	13.9438	15.1951	19.7562	24.5905	17.495	20.1399	11.2556	19.0216	25.6721
B0024.1	CHROMOSOME_V:10291670-10292843	0.32676	0.111152	0.306345	0.412906	1.27647	1.81481	1.07429	0.705181	0.195771	0	0.997018	10.9425	1.14522
B0024.10	CHROMOSOME_V:10315224-10317371	26.7382	24.9022	17.8389	11.1179	16.9458	17.2234	26.3426	30.3002	23.3584	22.9378	14.9619	23.8185	30.9274
B0024.11	CHROMOSOME_V:10317464-10319509	34.9692	34.2037	20.557	10.4174	18.063	18.375	20.9528	32.6811	22.8779	26.737	13.3808	27.655	29.1927
B0024.12	CHROMOSOME_V:10319508-10320161	15.7711	22.1058	23.07	29.0453	37.0114	25.4134	28.9041	35.7849	18.1852	28.6197	27.6441	43.0755	34.3995
B0024.13	CHROMOSOME_V:10320689-10322190	39.5969	36.0974	15.0147	11.3538	14.7787	16.2361	22.948	13.3453	16.3318	10.7787	18.0844	20.0593	30.6617
B0024.14	CHROMOSOME_V:10322261-10332087	4.04185	3.22006	7.50105	6.59542	11.0264	12.6188	6.84279	10.146	7.94781	10.2787	9.15606	10.6223	11.8093
B0024.15	CHROMOSOME_V:10289695-10291685	0	0	0.102722	0.415633	0.569619	0.498912	0.0540339	0.295584	0.984717	0.850742	0.501476	0.458653	1.15205
B0024.2	CHROMOSOME_V:10293492-10294596	0.111971	0	0.839809	1.16731	1.31224	1.69605	0.828298	1.93344	2.41541	2.95637	2.04991	4.21844	2.50179
B0024.3	CHROMOSOME_V:10287538-10289247	1.71259	1.74769	2.4405	1.03876	1.9067	2.69784	1.89185	2.66436	1.97247	2.9823	1.25412	3.44107	3.06116
B0024.4	CHROMOSOME_V:10297373-10298957	0	0	0	0.228062	0.822549	0.972008	0	0.216114	0.287988	1.11967	7.22014	17.2925	3.05731
B0024.6	CHROMOSOME_V:10308265-10314343	0	0	0.0533928	0.0809609	0.187715	0.301925	0.0280858	0.0765461	0.255007	0.132192	0.304097	0.297997	0.1497
B0024.8	CHROMOSOME_V:10299447-10307329	0.31993	0.150686	3.57623	3.61515	5.80434	7.45542	1.85691	4.52425	3.26123	4.11221	4.69316	4.63579	3.39621
B0024.9	CHROMOSOME_V:10314615-10315751	24.2006	24.9225	23.7788	22.6731	27.0148	20.8029	18.7896	19.3029	19.71	21.6731	20.9526	31.0633	25.4745
B0025.1	CHROMOSOME_I:6028487-6033460	27.3257	32.9703	27.0748	19.8171	36.1313	35.4902	33.549	49.136	30.1042	38.916	31.5146	37.8495	44.6779
B0025.2	CHROMOSOME_I:6022658-6026983	164.007	161.237	77.8992	44.2648	81.2435	80.4083	131.461	148.479	97.9762	115.483	58.3052	111	119.824
B0025.4	CHROMOSOME_I:6027193-6028373	158.414	148.23	60.7379	71.017	82.1688	79.645	112.242	158.062	119.363	106.371	64.0034	113.478	135.329
B0025.5	CHROMOSOME_I:6024152-6024957	4.1833	1.55237	0	0	0	0	0.375097	0	0	0	0	0	0
B0034.1	CHROMOSOME_II:5970079-5972638	0.29964	0.0611563	1.91026	5.56596	8.16448	13.9792	1.35948	5.04634	6.03489	5.95885	13.3484	8.27837	4.09569
B0034.2	CHROMOSOME_II:5944170-5944343	0	0	0	0	0	0	0	0	0	0	0	0	0
B0034.3	CHROMOSOME_II:5945380-5956660	35.2593	21.6681	115.074	111.925	109.159	150.8	46.2142	109.22	137.213	110.515	113.075	142.883	100.9
B0034.4	CHROMOSOME_II:5968109-5969033	0	0	0	0.357099	0	0	0	0.306003	0	0.293586	0.862265	0	0.24761
B0034.5	CHROMOSOME_II:5972830-5974952	0.509577	0.312012	0.095548	0.386352	0.671841	1.38936	0.150781	0.274845	0.549376	0.158216	0.9329	0	0.401841
B0034.7	CHROMOSOME_II:5961651-5961975	0.575654	0.587451	129.526	125.48	204.919	95.9146	52.2355	124.659	125.453	80.3569	91.3354	67.4713	57.5
B0035.1	CHROMOSOME_IV:11310949-11312475	345.149	313.643	158.706	108.359	161.947	155.002	220.553	275.446	274.699	281.142	130.256	159.624	197.157
B0035.10	CHROMOSOME_IV:11326534-11327321	24.2798	38.5057	14.8913	11.1962	8.39324	7.98183	42.6053	21.5995	37.5882	13.7835	9.84359	25.7557	12.8152
B0035.11	CHROMOSOME_IV:11327591-11329349	128.366	109.657	67.8945	39.9168	57.0932	57.3534	65.7569	107.413	107.652	123.986	53.4788	94.11	93.9903
B0035.12	CHROMOSOME_IV:11329443-11332922	22.8259	22.6241	13.0662	7.57378	12.1343	12.4621	15.438	19.5004	12.6091	15.2537	12.5008	19.8094	24.5194
B0035.13	CHROMOSOME_IV:11304698-11306698	0	0	1.0549	2.55932	3.956	5.11307	0.443922	1.27506	3.84321	2.44664	3.08992	1.64853	1.62674
B0035.14	CHROMOSOME_IV:11298985-11304765	31.9364	33.9115	48.688	40.732	75.7782	66.7703	56.0348	66.3536	51.2001	64.3611	58.5033	58.3499	67.7399
B0035.15	CHROMOSOME_IV:11296968-11298397	14.3354	12.839	17.1053	13.2061	18.9444	15.6403	17.6494	26.0056	15.8502	14.9391	15.5998	24.5489	25.0335
B0035.16	CHROMOSOME_IV:11295125-11296867	5.88063	4.74038	2.03828	1.77705	3.25743	4.64082	2.19335	4.53067	3.90633	2.14729	3.16443	4.55053	5.84488
B0035.18	CHROMOSOME_IV:11320297-11320621	244.992	153.195	88.947	67.1518	45.7416	58.2107	85.877	71.9259	58.7737	62.4973	49.4687	47.758	44.1951
B0035.2	CHROMOSOME_IV:11312450-11313960	18.2698	15.9683	21.6991	17.8787	26.9353	22.1796	18.9402	35.7096	25.7035	36.0174	19.5362	32.6494	33.6762
B0035.3	CHROMOSOME_IV:11314054-11315028	36.6854	29.3831	21.376	16.068	18.6275	16.8253	22.849	20.694	25.5238	21.8245	16.0545	29.3671	30.3508
B0035.4	CHROMOSOME_IV:11315182-11315855	166.357	150.131	137.478	143.567	96.3217	101.585	131.186	123.148	136.028	138.507	98.7092	133.139	120.842
B0035.5	CHROMOSOME_IV:11317394-11319928	22.6148	22.1133	13.6368	9.86901	19.7797	16.7955	17.5756	21.3403	16.6789	19.0288	16.0974	21.7099	17.3936
B0035.6	CHROMOSOME_IV:11320777-11323614	121.346	108.366	32.2504	10.9562	18.0269	25.1376	23.8972	22.8372	34.2866	21.266	17.6983	33.8072	48.123
B0035.7	CHROMOSOME_IV:11323862-11324448	69.8167	87.2263	34.0136	38.524	31.9451	18.5753	128.906	34.7979	39.9307	18.3398	36.4571	61.5353	49.3516
B0035.8	CHROMOSOME_IV:11324696-11325200	180.405	252.349	107.902	110.796	74.9472	45.0342	355.231	89.7602	99.1516	35.6502	88.6903	188.874	181.244
B0035.9	CHROMOSOME_IV:11325995-11326307	49.5784	59.5685	35.7045	36.5526	12.4766	20.1377	47.1926	39.4014	53.6868	37.0628	26.8322	113.768	62.3394
B0041.1	CHROMOSOME_I:4664499-4665349	0.797738	0.610565	0	0.189009	0.438234	0	0.196706	0.540145	0	0	0	0	0
B0041.2	CHROMOSOME_I:4653471-4660152	186.237	186.685	155.801	110.636	157.749	157.156	247.917	282.691	190.709	261.123	122.538	174.141	173.665
B0041.3	CHROMOSOME_I:4644437-4645627	18.7608	19.1453	23.007	31.5154	38.0335	26.1276	22.9766	23.7696	28.8535	18.835	26.0443	12.2824	17.7625
B0041.4	CHROMOSOME_I:4645636-4646966	779.473	986.343	1677.62	1508.22	1632.55	1518.12	1283.88	831.714	1007.34	857.134	1063.74	848.679	657.087
B0041.5	CHROMOSOME_I:4648269-4650771	59.3168	48.6383	31.6104	25.248	41.6179	38.7765	29.6974	34.6378	28.8795	36.8889	35.3511	41.9642	42.9463
B0041.6	CHROMOSOME_I:4652143-4652907	16.7889	11.7566	27.5442	43.7327	58.1211	37.4574	25.8767	56.6956	39.6994	43.599	39.6324	29.0032	23.7314
B0041.7	CHROMOSOME_I:4665744-4671739	67.6564	72.9132	44.7102	29.9691	57.7799	54.3389	78.0475	109.163	58.0353	61.412	38.8227	78.841	94.7195
B0041.8	CHROMOSOME_I:4647309-4648279	120.095	109.581	43.9627	29.4533	36.2786	31.3694	44.727	57.504	66.9693	52.9104	24.9108	53.8037	56.1768
B0047.1	CHROMOSOME_II:2040275-2041620	0.0984236	0.130581	0.369499	0.364537	0.28868	0	0.442703	0.583855	0.176824	0.305542	0.195602	0.535543	0.337022
B0047.2	CHROMOSOME_II:2043027-2044109	0.25221	0.193034	0.591131	0.358539	0.461835	1.14608	0.684087	0.476618	0.907323	1.56781	0.577161	0.527876	1.16017
B0047.3	CHROMOSOME_II:2044628-2046589	0.466298	0.566693	0.961142	0.404834	1.00122	1.81169	0.793093	1.33533	1.68738	0.927716	1.43371	1.07287	1.34741
B0047.4	CHROMOSOME_II:2045967-2046661	0.0429053	0	0.0642774	0	3.08e-07	1.47e-07	0.169996	0.055722	0	1.76e-05	3.32e-06	0	0.360436
B0198.1	CHROMOSOME_X:12031377-12033969	0.609663	0.380206	9.14516	9.3089	17.7134	16.7249	8.95299	12.6957	8.99367	11.3404	18.6021	8.79039	8.45791
B0198.2	CHROMOSOME_X:12028642-12031549	0.378314	0.321891	1.76662	2.79164	7.45674	5.67215	0.807704	2.01659	2.65291	2.71994	4.036	2.10603	2.31849
B0198.3	CHROMOSOME_X:12042547-12049279	0.128899	0.0730777	7.92207	6.78669	10.91	14.2745	6.6675	7.08398	4.51474	5.14173	8.04076	7.67388	8.33876
B0205.1	CHROMOSOME_I:10713438-10718190	50.281	49.988	16.7468	10.332	17.2248	20.7334	26.641	32.5172	22.9806	23.2078	13.9902	29.6394	35.4269
B0205.10	CHROMOSOME_I:10708351-10710364	1.10044	0.561487	0.48144	0	0	0	0.104776	0.0790285	0	0	0	0.153507	0.0963941
B0205.11	CHROMOSOME_I:10732530-10733674	57.9159	63.2307	36.8879	35.8954	57.9981	51.0575	61.3549	45.7243	42.5458	47.9955	51.4248	52.3355	54.29
B0205.12	CHROMOSOME_I:10730455-10730701	106.036	82.9603	294.92	224.435	157.924	112.43	247.519	157.023	100.323	154.78	204.909	133.16	157.944
B0205.13	CHROMOSOME_I:10727739-10728784	0.191586	0	3.2331	3.63143	8.13911	8.70594	3.59033	0.209249	0	1.20455	25.1366	35.2871	5.03601
B0205.14	CHROMOSOME_I:10726906-10727340	0	0	0	0	1.14734	0	0.772491	3.58796	2.98825	0	4.77949	3.27852	0
B0205.2	CHROMOSOME_I:10724149-10726125	0	0	0.119194	0	0	0	0	0.0686486	0	0	0	0	0
B0205.3	CHROMOSOME_I:10730717-10732437	257.105	235.253	73.409	39.0582	63.2045	61.2761	75.114	120.191	142.407	100.28	61.0755	117.587	154.642
B0205.4	CHROMOSOME_I:10741357-10744432	0.0396912	0	4.83749	2.78362	7.90767	6.25257	2.62292	7.27148	2.13745	4.30897	4.96538	5.81518	5.2166
B0205.5	CHROMOSOME_I:10740206-10740579	1.18554	0	0	0	0	0	0	0	0	0	0	4.96266	0
B0205.6	CHROMOSOME_I:10736685-10739900	18.475	18.7004	24.2209	17.5092	34.3807	31.9659	22.5926	30.4253	25.4747	34.7029	24.863	30.3373	28.4272
B0205.7	CHROMOSOME_I:10734010-10736610	602.599	596.289	295.256	222.266	300.854	328.197	576.621	421.363	396.307	387.823	330.668	394.136	487.518
B0205.8	CHROMOSOME_I:10728883-10730226	166.736	152.787	133.228	95.3496	76.9722	67.831	171.375	95.3423	60.062	91.1618	54.6552	135.592	169.113
B0205.9	CHROMOSOME_I:10720814-10723580	63.2601	59.1288	23.0179	12.8817	21.4462	23.1109	24.2424	34.207	31.5961	31.0435	19.9987	32.7213	47.7318
B0207.1	CHROMOSOME_I:5965063-5967213	0	0.0622472	0	0.0578087	0	0	0	0.0656809	0	0.0945237	0	0	0
B0207.10	CHROMOSOME_I:5959009-5959528	0	0	0	5.87821	1.81721	0	0	2.10582	0	0	3.785	2.59634	0
B0207.11	CHROMOSOME_I:5962953-5964128	0	0.0751739	0	0	0	0	0	0.0796218	0	0	0	0	0
B0207.12	CHROMOSOME_I:5967252-5973322	0.752402	1.03583	6.23989	7.31895	15.9144	21.1302	2.718	10.1106	10.228	8.10363	15.2747	6.0564	7.00405
B0207.2	CHROMOSOME_I:5955031-5956885	0.28202	0.325774	1.23386	1.06917	2.34113	0.854358	0.944606	1.60785	1.35645	2.65607	0.974042	1.78175	0.839128
B0207.3	CHROMOSOME_I:5942420-5945539	0.203601	0.0917043	0.505473	0.425813	1.55518	0.952972	0.433692	1.45323	0.64551	0.83656	1.86372	0.426131	0.802781
B0207.4	CHROMOSOME_I:5937478-5938887	177.59	177.494	69.1728	37.8131	65.0571	70.9125	111.681	117.053	108.25	94.1476	52.1524	112.883	137.553
B0207.5	CHROMOSOME_I:5919788-5935418	0.143159	0.120312	0.268429	0.159618	0.308407	0.165823	0.739224	0.307595	0.105487	0.143217	0.115626	0.458261	0.398442
B0207.6	CHROMOSOME_I:5935371-5936946	18.6248	21.0777	15.2225	7.35464	15.8281	11.2121	14.4839	17.9797	17.6044	14.6532	16.2106	19.9906	18.6726
B0207.7	CHROMOSOME_I:5945758-5947344	0	0.102191	0	0.0949046	0	0	0	0.0540066	0.179919	0	0	0	0
B0207.8	CHROMOSOME_I:5951137-5951744	0	0	0	0	0	0	0	0	0	0	0	0	0
B0207.9	CHROMOSOME_I:5957461-5958361	0.177525	0	0	0.33649	0	0	0	0	0	0	0	0	0
B0212.1	CHROMOSOME_IV:3572466-3577625	1.02013	0.844083	2.48146	2.19491	4.24091	4.76091	1.08776	2.31508	2.27421	2.392	3.44915	2.88532	2.75398
B0212.2	CHROMOSOME_IV:3565196-3567810	0	0	0	0	0.136717	0.282726	0	0	0	0	0	0	0
B0212.3	CHROMOSOME_IV:3540183-3543598	17.0464	18.7014	9.09304	4.20339	11.0846	10.2248	10.4917	15.9457	9.61089	11.3231	7.13822	14.2304	18.3523
B0212.4	CHROMOSOME_IV:3543623-3547596	0.872065	1.06882	1.72093	1.22167	2.59648	3.53897	1.56647	2.1836	1.38993	2.87397	2.33539	2.22512	2.4354
B0212.5	CHROMOSOME_IV:3550883-3557427	0.207962	0.424448	1.9497	1.87994	3.16366	3.8285	0.568015	1.82359	1.834	1.58453	2.92864	0.602674	0.756896
B0212.6	CHROMOSOME_IV:3570714-3571642	1.22844	0.537264	1.31622	5.98745	7.19828	6.37966	1.38472	5.55051	3.82575	2.20357	4.81917	2.93843	0.92259
B0213.10	CHROMOSOME_V:3955750-3957700	0.0345838	0.070585	0.129693	0.065552	0	0.104769	0.0341106	0	0	0	0.105523	0	0.181814
B0213.11	CHROMOSOME_V:3958223-3961174	0.355467	0.217651	0.266607	0.539018	0.937319	0.430745	0.175302	0.650985	0.382713	0.330655	0.759228	0.446397	0.46719
B0213.12	CHROMOSOME_V:3961744-3963800	0	0	0.132995	0.0672212	0.0519528	0	0	0.0382043	0.127275	0	0.10821	0	0
B0213.14	CHROMOSOME_V:3964763-3967856	0	0	0.238395	0.421733	0.838134	1.15549	0.0627007	0.581907	0.684204	0.295568	0.678888	0.665266	0.250652
B0213.15	CHROMOSOME_V:3968117-3970499	1.01686	0.894738	1.99144	0.54983	0.843046	1.61016	0.888407	1.25634	0.348326	1.83041	1.04071	1.89678	3.16656
B0213.16	CHROMOSOME_V:3970696-3972986	0	0	0.0630435	0.0637296	0	0	0	0	0	0	0	0	0
B0213.17	CHROMOSOME_V:3978810-3979119	22.1314	15.741	110.661	143.645	261.333	142.218	64.163	38.8544	25.3805	59.206	294.668	325.652	93.432
B0213.2	CHROMOSOME_V:3989075-3989755	0.230433	0.235156	0	1.96549	1.0127	5.93369	0.568202	3.12478	0	0.719517	21.4447	42.4422	7.57145
B0213.3	CHROMOSOME_V:3987884-3988302	0	0	0	2.28944	2.52774	1.04546	0.17019	1.14607	0	1.09956	3.15895	2.16689	0.90713
B0213.4	CHROMOSOME_V:3984397-3984834	0.559548	0.856522	106.492	163.067	161.89	146.627	81.2661	78.8376	57.4528	140.05	309.022	477.238	141.199
B0213.5	CHROMOSOME_V:3981964-3982730	0	0.273796	19.2844	22.2065	21.7481	18.6941	3.79299	8.32477	5.15969	19.5031	27.5608	32.9442	7.52263
B0213.6	CHROMOSOME_V:3980039-3980614	101.372	122.847	199.242	191.802	253.779	134.904	213.896	95.4045	59.2236	127.919	260.703	425.859	201.277
B0213.7	CHROMOSOME_V:3977248-3978796	0	0.11756	0	0	0.0843792	0	0	0	0	0	0	0	0
B0213.8	CHROMOSOME_V:3974645-3976249	0.0519366	0.053001	0	0	0	0	0	0	0	0	0.158471	0	0
B0213.9	CHROMOSOME_V:3954023-3955445	0	0	0	0	0	0	0	0.0551534	0	0	0	0	0
B0218.1	CHROMOSOME_IV:8159343-8162028	4.26335	5.08147	7.78759	9.43438	15.9292	21.4337	4.53141	12.9874	13.1426	15.4102	17.8882	13.0536	12.019
B0218.2	CHROMOSOME_IV:8152428-8154845	1.86834	1.85215	3.0528	2.52954	5.23932	5.25574	2.57987	6.17705	3.4719	7.40179	7.81815	9.94365	4.84095
B0218.3	CHROMOSOME_IV:8148779-8150727	35.3265	32.0172	31.5184	31.214	51.715	47.5969	27.3355	58.9922	49.6141	57.2548	47.5672	59.641	54.2533
B0218.5	CHROMOSOME_IV:8155236-8156433	0.356308	0.0519443	0.381769	0.771847	0.521965	0.462605	0	0.384355	0.731686	0.790198	0.155311	0.639219	0.401395
B0218.6	CHROMOSOME_IV:8161737-8163781	0	0	0.170154	0.258009	1.2629	2.61165	0.0895049	0.342447	0.325954	1.12646	1.10756	0.569799	0.596339
B0218.7	CHROMOSOME_IV:8164579-8166064	0.0512989	0.157051	0.192376	0.0972344	0.075149	0	0	0	0	0	0	0	0
B0218.8	CHROMOSOME_IV:8167148-8168760	0.175661	0.179261	0.548955	2.21972	0.686215	0.886922	0.173258	0.505641	0.210563	0.545765	2.32259	1.71574	0.615655
B0222.1	CHROMOSOME_V:9134276-9135553	0.260567	0.265907	1.27029	1.28412	1.37416	2.05236	0.719604	0.787099	1.12378	0.647281	1.59009	1.09073	1.23286
B0222.10	CHROMOSOME_V:9158360-9159515	0.077647	0	0.291183	0.0735882	0.341241	0.235226	0.229753	0.335824	0	0	0	0	0
B0222.11	CHROMOSOME_V:9165796-9168018	0	0	0	0.356325	0.895016	0.427124	0.0463542	0.101359	0	0	0.573597	0.196731	0.123537
B0222.2	CHROMOSOME_V:9135633-9137696	0	0	0	0	0	0	0	0.0402612	0	0	0	0	0
B0222.3	CHROMOSOME_V:9138927-9141375	0.0325047	0	2.92549	2.40283	4.61883	2.95412	1.95565	2.17042	1.16622	1.7129	6.24828	3.53768	3.67398
B0222.4	CHROMOSOME_V:9144592-9146877	0	0	3.07391	2.4415	3.98831	0.97554	2.74304	1.98571	3.15011	3.08451	7.05656	18.3815	4.54012
B0222.5	CHROMOSOME_V:9152298-9154850	0.27898	0.177935	0.130775	0.528793	0.510855	1.26772	0.412744	0.112693	0.625718	0.108121	0.638422	0.291953	1.00832
B0222.6	CHROMOSOME_V:9159618-9160640	4.23832	3.18804	303.816	849.839	571.574	1197.23	56.7239	332.526	799.461	336.995	678.15	312.79	235.108
B0222.7	CHROMOSOME_V:9162027-9162982	1.08814	0.964623	57.5409	206.885	152.664	331.282	17.378	70.9123	226.628	67.8641	198.646	80.7469	64.5438
B0222.8	CHROMOSOME_V:9164271-9165284	4.81451	3.72865	343.307	927.065	634.108	1334.02	67.3718	413.685	972.367	437.85	759.49	338.492	252.684
B0222.9	CHROMOSOME_V:9168368-9173001	4.43295	5.88093	2.4447	1.60635	2.86497	3.27833	3.34352	5.34078	2.47506	2.54186	2.10845	4.80282	5.65484
B0228.1	CHROMOSOME_II:7755955-7756856	0.172487	0.176023	3.23423	3.26943	5.05364	4.44158	3.82787	3.07962	2.79805	2.95467	4.2104	3.61018	4.534
B0228.4	CHROMOSOME_II:7724849-7752673	0.252955	0.15201	32.8475	31.3096	52.1237	55.6593	22.1335	45.1952	23.3441	33.0565	48.3154	44.3636	42.118
B0228.5	CHROMOSOME_II:7752516-7753554	0.132108	0.673799	4.19964	5.00809	8.89147	7.59311	3.71113	8.14034	5.1897	8.26231	6.77026	13.2721	11.9701
B0228.6	CHROMOSOME_II:7754514-7755104	19.9599	14.5492	63.8243	77.0173	188.231	103.658	132.71	169.528	104.275	166.193	160.412	111.9	104.933
B0228.7	CHROMOSOME_II:7757134-7758387	21.2731	28.0407	28.5553	24.4819	36.6547	27.6044	26.6168	21.3451	20.069	31.6557	28.1546	45.2331	40.2034
B0228.8	CHROMOSOME_II:7759657-7761488	0	0	0	0	0	0	0	0	0	0	0	0.165718	0
B0228.9	CHROMOSOME_II:7762009-7763617	0	0	0	0	0	0.12344	0.0401894	0	0.1463	0	0	0	0
B0238.1	CHROMOSOME_V:5240753-5243120	1.91025	1.90532	3.5548	2.94758	4.61239	5.40891	2.58474	5.79782	6.92035	5.80053	6.66335	7.65476	8.73043
B0238.10	CHROMOSOME_V:5274057-5275546	105.637	93.501	230.262	222.196	252.523	220.738	171.277	246.485	200.575	266.071	247.862	228.512	225.8
B0238.11	CHROMOSOME_V:5269466-5270728	387.208	459.338	223.12	153.248	244.514	190.264	274.876	421.821	360.592	397.451	171.751	303.211	334.942
B0238.12	CHROMOSOME_V:5267805-5268807	0.193148	0	1.08648	1.83052	1.41474	4.0959	0.571516	2.0919	1.39381	0.301052	2.35736	4.44686	1.26927
B0238.13	CHROMOSOME_V:5243712-5248024	0.537085	0.307466	0.343873	0.223468	0.614079	0.595265	0.300399	0.792681	0.704203	0.790938	0.739444	1.02816	1.61838
B0238.15	CHROMOSOME_V:5240172-5240435	42.251	29.4289	17.605	8.89835	0.982453	4.06337	7.27622	9.14222	2.53805	8.77125	6.13892	11.2294	8.81433
B0238.3	CHROMOSOME_V:5250587-5252100	0	0	0	0	0	0	0	0.0777405	0.258987	0.223758	0.219489	0	0
B0238.5	CHROMOSOME_V:5256125-5257407	0	0	0	0	0	0	0	0	0	0	0	0	0
B0238.6	CHROMOSOME_V:5258019-5259532	0.0598501	0	0	0	0.0876759	0.181312	0	0.0646119	0	0	0.182616	0	0
B0238.7	CHROMOSOME_V:5260315-5263083	0.0299812	0	0.0562163	0	0.0439203	0	0	0	0	0	0	0	0
B0238.8	CHROMOSOME_V:5263934-5265760	0.0618617	0.0631295	0.191522	0.586296	0.388185	0.309432	0.151118	0.267188	0.445056	0.317139	1.71466	0.258954	0
B0238.9	CHROMOSOME_V:5275532-5278290	44.9761	37.873	14.9172	7.87583	7.4083	11.3297	17.3068	17.671	25.4705	17.1252	10.1912	19.7994	29.2545
B0240.1	CHROMOSOME_V:11727879-11730142	0	0.149733	0.756578	0.556227	2.25691	3.33373	1.08539	1.50175	1.05325	0.796238	1.34309	1.2284	2.50695
B0240.2	CHROMOSOME_V:11733525-11736950	0.159169	0.142127	0.0373062	0	0	0	0.0981195	0.0428081	0	0.123213	0.121415	0	0.0522989
B0240.3	CHROMOSOME_V:11718070-11725634	0.0381615	0.0519249	1.35954	1.88067	3.13061	3.31409	0.577138	2.16081	1.54905	2.2437	2.75573	2.44942	1.77216
B0240.4	CHROMOSOME_V:11730973-11733461	166.378	150.719	52.9432	26.1202	39.9944	41.511	76.2086	39.2415	54.747	34.9319	44.0269	57.6851	70.0588
B0244.10	CHROMOSOME_III:5733950-5737469	0	0.0266341	0.440437	0.643109	0.688202	0.474395	0.592069	0.646129	0	0.485147	0.238904	0.546259	0.274417
B0244.11	CHROMOSOME_III:5767836-5768620	0	0	0.220458	0	0	0.356185	0	0	0	0	0	0	0
B0244.2	CHROMOSOME_III:5755492-5765769	4.46887	5.70056	43.4137	48.5595	76.8091	95.6421	21.4306	39.0385	63.094	44.7903	86.2212	73.4561	50.0759
B0244.4	CHROMOSOME_III:5747438-5751562	0	0.0620463	0.34201	0	0.267203	0.36838	0.119937	0	0.218685	0	0.185515	0	0
B0244.5	CHROMOSOME_III:5744832-5747149	0	0	0.0835915	0.169003	0.653078	0.54022	0.0879421	0.336444	0	0	0.40808	0.373233	0.234371
B0244.6	CHROMOSOME_III:5737961-5744774	0.0162287	0	0.334725	0.123043	0.309059	0.393309	0.160066	0.191983	0.34886	0.0502345	0.297104	0.339666	0.383927
B0244.7	CHROMOSOME_III:5731454-5732808	0	0	0.114003	0.115244	0.35627	0	0.119937	0.196929	0	0.188939	0.185515	0.25451	0
B0244.8	CHROMOSOME_III:5728131-5730348	7.00908	6.0974	2.8547	1.90569	2.01989	2.52366	3.40348	1.91746	6.38787	1.86935	1.49003	2.40493	3.02037
B0244.9	CHROMOSOME_III:5730073-5730965	0	0	0	0	0	0	0	0	0	0	0	0	0
B0250.1	CHROMOSOME_V:20479655-20480815	1188.05	1642.83	2424.75	2435.66	2416.15	1977.56	2473.63	1436.23	1564.04	1486.34	2011.19	1925.41	1719.45
B0250.10	CHROMOSOME_V:20487613-20489171	0	0	0	0	0	0	0	0	0	0	0.195608	0	0
B0250.2	CHROMOSOME_V:20476716-20479058	1.08241	1.25187	11.7715	15.1823	18.7106	17.2698	11.5301	16.689	20.7844	18.8551	17.8344	18.7281	12.3292
B0250.4	CHROMOSOME_V:20458622-20464455	7.08536	9.16124	16.2068	12.3049	24.7805	23.7122	19.7213	24.86	11.584	17.1407	16.0728	15.9943	26.2304
B0250.5	CHROMOSOME_V:20493892-20497315	98.0529	94.5598	61.8408	41.9736	45.4004	51.3841	52.8221	56.2528	68.112	70.3888	49.837	60.9211	50.5024
B0250.6	CHROMOSOME_V:20490739-20492454	0	0	0	0	0	0	0.0699649	0	0	0	0	0	0
B0250.8	CHROMOSOME_V:20469671-20470454	0.0941988	0	0.176627	0.17855	0	0.285369	0.0929098	0.408004	0.679618	0.293586	0.287421	0.394317	0.49522
B0250.9	CHROMOSOME_V:20480760-20485354	1.89129	2.87687	8.56456	11.2957	15.5781	18.1616	7.39127	9.95657	6.91566	9.40503	14.5902	11.2033	7.97305
B0252.1	CHROMOSOME_II:6919686-6923621	0.0652228	0	0.815304	0.37088	1.14655	1.11966	0.75052	0.631595	0.07793	0.875285	1.26039	0.910076	0.457184
B0252.2	CHROMOSOME_II:6910027-6912653	20.7731	27.9858	7.48231	4.98885	8.08452	7.802	9.99318	12.7968	14.0075	12.1021	6.6492	9.95138	12.8698
B0252.3	CHROMOSOME_II:6902825-6907713	5.07517	5.44686	1.85334	1.34598	2.46158	5.25208	1.37441	3.3001	3.66468	2.34386	4.84247	3.16367	2.9824
B0252.4	CHROMOSOME_II:6912497-6913321	139.16	118.472	63.7846	50.8603	53.271	40.5372	55.7056	87.1282	68.4182	72.2892	44.8964	80.5747	91.8866
B0252.5	CHROMOSOME_II:6916948-6918878	0.241921	0.123439	0	0	0	0	0.0596527	0	0	0	0	0	0
B0252.8	CHROMOSOME_II:6916111-6916923	0.859391	0.877003	6.44559	8.95918	8.18313	5.20693	0.847632	0.958103	1.59592	1.37884	2.62219	3.59742	4.51797
B0261.1	CHROMOSOME_I:5263696-5268387	52.3654	47.1152	26.0883	20.8601	31.0187	36.1037	46.2122	49.7256	36.2375	37.311	24.4743	37.5548	42.3685
B0261.2	CHROMOSOME_I:5245742-5263429	56.0694	42.8132	31.0117	22.9611	38.7714	39.1575	42.2582	52.174	28.6203	34.072	34.9204	45.1399	56.6568
B0261.4	CHROMOSOME_I:5244285-5245526	51.0372	58.0798	44.6793	46.4099	44.7016	37.1428	58.1988	71.6278	81.5281	74.7489	36.3399	53.2782	57.212
B0261.5	CHROMOSOME_I:5249774-5250440	0.228713	0.233401	0	0	0	0	0	0.124049	0	0	0	0	0.300597
B0261.6	CHROMOSOME_I:5255449-5256926	0.712851	0.359955	0	0.222858	0.261064	0	0.175772	0.127576	0	0	0	0	0.936893
B0261.7	CHROMOSOME_I:5269546-5270937	87.3066	76.2274	33.3905	19.9787	30.0354	39.9503	44.575	48.8946	63.1151	59.6094	25.112	34.0483	55.4124
B0261.8	CHROMOSOME_I:5271279-5272040	34.5812	29.056	65.8119	89.6851	131.349	80.2959	100.588	123.874	72.5172	100.116	78.3463	84.5137	118.931
B0261.9	CHROMOSOME_I:5268421-5269466	0	0.312788	0	0.290485	0.224505	0	0	0.333629	0.555731	0	0.467611	0	0
B0272.1	CHROMOSOME_X:9434392-9436834	0.980066	0.896688	43.217	39.4595	59.4587	56.207	28.3664	42.2251	38.0779	49.9761	49.8057	46.8258	37.7545
B0272.2	CHROMOSOME_X:9440338-9441505	45.1306	42.0926	23.6155	16.114	16.7588	23.2106	38.0949	26.7326	20.4643	25.5388	17.9335	30.7539	33.6578
B0272.3	CHROMOSOME_X:9431365-9432689	197.062	171.851	123.618	88.4161	105.571	101.888	146.492	125.46	169.01	134.732	133.323	172.634	123.508
B0272.4	CHROMOSOME_X:9428371-9430264	9.41472	13.0692	29.9842	29.6545	33.3641	32.5058	25.2631	24.2337	24.4191	23.4656	56.608	62.5925	26.2031
B0273.1	CHROMOSOME_IV:5493985-5495241	0.491631	1.25427	0.921831	1.08717	0.600168	0.74468	0.646539	0.974926	0	0	0.750039	0.342995	0
B0273.2	CHROMOSOME_IV:5486675-5490322	198.689	165.589	56.9984	22.8622	25.2083	38.8519	61.6667	23.6265	38.0451	31.9296	31.4404	44.1571	59.1929
B0273.3	CHROMOSOME_IV:5484036-5486201	9.72326	8.04842	4.87039	2.07427	2.2112	2.80079	2.27659	2.74449	4.56025	3.10125	2.43714	2.76434	3.45518
B0273.4	CHROMOSOME_IV:5495656-5516256	13.8997	14.6656	34.9872	27.5982	38.5587	46.244	23.599	40.2811	23.7222	39.1912	35.4343	35.1395	42.4077
B0280.1	CHROMOSOME_III:7133726-7136401	25.384	21.1149	18.6297	13.6658	19.556	15.6407	17.3647	24.5158	23.4743	24.5363	23.5315	37.4016	37.7075
B0280.10	CHROMOSOME_III:7131971-7133616	9.93937	9.64827	5.81831	5.14643	5.89519	5.28771	7.12538	13.4385	11.3231	8.57878	7.54483	13.1923	15.2936
B0280.11	CHROMOSOME_III:7136445-7138216	0.0386888	0	0.0725434	0.0733329	0	0	0	0.0416895	0	0	0.118048	0	0
B0280.12	CHROMOSOME_III:7138620-7144770	0.23681	0.167305	1.64146	1.41635	3.28136	3.03815	0.664781	2.60281	2.08883	2.0293	1.69513	2.59262	1.34073
B0280.13	CHROMOSOME_III:7128836-7131986	0.215653	0.184313	3.10855	3.47447	6.29161	7.01238	2.19188	4.36721	3.2868	3.95329	8.12912	4.04345	4.60986
B0280.17	CHROMOSOME_III:7134959-7136065	0.325997	0.332677	0	0	0	0	0.0643072	0.140839	0	0.202687	0	0.272924	0.171382
B0280.2	CHROMOSOME_III:7124601-7128320	0.11471	0.078041	0.764757	0.700604	0.914897	1.95634	0.314281	0.836817	0.502717	0.579114	1.38707	0.889222	0.87108
B0280.3	CHROMOSOME_III:7123061-7124270	45.0886	54.7146	35.1534	27.5653	37.3036	31.6711	50.5203	28.4327	30.0336	27.0371	39.5619	44.496	46.0568
B0280.4	CHROMOSOME_III:7108259-7109248	2.88943	3.93152	6.73123	8.63005	13.2115	6.1008	11.3995	14.308	7.26042	8.18193	7.21334	5.86433	10.8173
B0280.5	CHROMOSOME_III:7102023-7103930	19.1242	20.2234	24.5073	16.0885	13.2763	21.5262	10.277	12.1929	61.9018	18.196	11.6674	15.6285	20.4233
B0280.7	CHROMOSOME_III:7110240-7111811	0.0484847	0	3.09097	2.66512	4.54569	4.99395	0.573856	3.92175	4.70341	3.31111	5.47369	3.45028	3.44106
B0280.8	CHROMOSOME_III:7112236-7115378	25.8557	26.541	22.7322	18.5542	25.8225	29.5368	27.6896	33.106	22.4418	27.1235	31.972	25.6685	26.8105
B0280.9	CHROMOSOME_III:7120841-7122833	63.7939	66.3954	34.1556	22.3626	38.1131	33.1799	42.6422	56.4829	48.1457	63.289	32.7151	37.4824	44.3464
B0281.1	CHROMOSOME_II:2313071-2314932	0	0.121225	0	0	0	0.359867	0	0.128909	0	0	0	0	0
B0281.3	CHROMOSOME_II:2307045-2308356	0.0532608	0	0.0998662	0.504768	0.78023	0.3227	0.105064	0.45972	0	0.4962	1.30008	1.7836	0.840006
B0281.4	CHROMOSOME_II:2297851-2298798	1.86865	0.953474	0.350381	0.354195	0.136871	0	0.64508	0.202329	0.337022	0.29118	0.285085	0.78222	0.245596
B0281.5	CHROMOSOME_II:2299844-2300887	447.41	520.326	129.88	102.786	155.823	93.7542	221.278	222.911	266.035	202.429	118.302	226.96	326.373
B0281.6	CHROMOSOME_II:2301312-2302234	0.174121	0	0.163243	0.33004	0.127538	0	0	0.471064	0	0	0.531285	1.45775	0.228847
B0281.8	CHROMOSOME_II:2311494-2312852	0	0	0	0	0	0	0	0	0	0	0	0	0
B0284.1	CHROMOSOME_III:4376474-4379172	0	0.0321476	0.53161	1.04494	1.33829	1.24063	1.05641	1.62835	0.678091	1.36699	5.67107	16.6812	5.21677
B0284.2	CHROMOSOME_III:4381710-4384113	0.923093	1.17751	0.649066	1.09355	1.40861	1.2817	0.948398	2.19656	1.24262	1.55074	2.22978	4.83009	3.03304
B0284.3	CHROMOSOME_III:4379339-4381013	46.3656	48.8681	57.6767	94.1839	60.7419	58.7104	99.2416	83.4666	70.4317	88.2871	51.2255	58.9571	51.5344
B0284.4	CHROMOSOME_III:4384758-4387729	0	0	0	0	0.127162	0.394451	0	0	0	0	0	1.45346	0
B0285.1	CHROMOSOME_III:4333368-4340455	101.601	95.0396	56.5022	42.1523	60.5035	57.9916	100.342	68.9677	53.569	50.7639	50.4675	70.0737	106.425
B0285.10	CHROMOSOME_III:4370856-4372792	0.0509013	0	0.190884	0.289443	0.521965	0.154202	0.0502048	0.494171	0.548764	0.15804	1.39779	1.70459	0.267597
B0285.3	CHROMOSOME_III:4341656-4343308	63.1596	56.6925	42.7826	32.8018	34.3937	26.3798	62.3498	101.699	51.3158	53.7505	25.897	53.0619	62.4388
B0285.4	CHROMOSOME_III:4343432-4345194	69.4301	57.6422	36.6372	22.5156	31.5357	30.9918	32.1838	41.2046	37.2789	44.8505	35.801	52.7689	65.38
B0285.5	CHROMOSOME_III:4345308-4350051	76.8502	71.5519	35.8787	22.2154	43.514	39.0636	40.3579	57.8571	41.4385	48.0685	31.0542	45.4952	82.6188
B0285.6	CHROMOSOME_III:4352217-4355860	0.03004	0.0306557	0.112653	0.170819	0.132019	0.455021	0.029629	0.161728	0.538783	0.279297	0.274977	0.125748	0
B0285.7	CHROMOSOME_III:4356510-4364944	56.6998	69.8071	97.393	81.429	143.798	130.51	197.341	111.592	69.8612	103.106	111.198	130.544	134.902
B0285.8	CHROMOSOME_III:4365346-4367441	1.39414	2.00068	2.20562	1.32126	3.38257	2.77163	2.92201	4.08603	2.34694	3.92023	4.65262	6.01823	3.77913
B0285.9	CHROMOSOME_III:4367803-4370132	25.236	26.4286	4.80944	2.35248	3.9999	5.01316	4.61091	12.0838	11.7352	9.24056	5.42793	12.4688	16.5294
B0286.1	CHROMOSOME_II:4378658-4386355	3.43607	3.16159	45.4164	36.0345	52.4813	41.808	34.1128	74.7739	31.1886	57.5668	34.2026	55.6473	68.4064
B0286.2	CHROMOSOME_II:4359085-4368285	0.0110346	0.0335743	2.52707	2.88647	5.09672	5.82968	1.14893	2.77609	5.25041	3.75636	5.84629	7.00316	3.32775
B0286.3	CHROMOSOME_II:4369628-4372572	1.07233	0.716956	18.0266	12.1953	21.5589	20.8355	5.58003	7.68887	7.83046	8.14133	16.2467	15.3237	8.55332
B0286.4	CHROMOSOME_II:4372743-4376745	320.058	341.047	283.483	232.172	295.733	302.232	299.194	393.385	351.98	387.343	289.52	328.401	372.337
B0286.5	CHROMOSOME_II:4379885-4383290	0.119701	0.18323	0.561109	0.680659	0.526055	0.543934	0.767406	0.387671	0.21525	0.929852	0.547848	0.250532	0.629286
B0286.6	CHROMOSOME_II:4368493-4447363	0	0	0	0	0	0	0	0	0	0	0	0	0
B0294.1	CHROMOSOME_X:1896656-1897337	1.19829	1.88985	2.24685	6.19447	5.26621	8.58031	5.80203	0.472446	1.57392	1.35983	5.98296	3.64804	3.14981
B0294.3	CHROMOSOME_X:1892180-1893266	0	0	0	0	0	0	0	0	0	0	0	0	0
B0302.1	CHROMOSOME_X:17186065-17193219	54.1768	54.79	55.0678	48.0975	55.0796	59.7492	69.4741	40.7768	37.5149	46.444	53.3914	57.5862	53.7072
B0302.2	CHROMOSOME_X:17178464-17178918	1.79417	1.37321	0.841042	0	1.31417	0.679417	1.76962	0.736983	1.6368	0.707078	0.684306	0	1.76856
B0302.4	CHROMOSOME_X:17176415-17176703	14.4463	11.0567	2.25729	6.84557	7.05424	10.941	14.2487	7.08863	9.4461	0	0	10.0787	9.49335
B0302.5	CHROMOSOME_X:17193223-17195044	0.834259	0.510814	17.3634	33.3655	49.8628	50.2938	16.3746	15.6133	28.2623	22.08	38.1827	24.0962	23.4643
B0303.11	CHROMOSOME_III:8703225-8710031	0.289591	0.278141	2.45945	3.71318	5.1656	5.41858	1.10891	1.997	2.62454	2.32026	6.23722	2.56708	3.00009
B0303.14	CHROMOSOME_III:8713907-8716103	37.8743	36.5448	8.36217	3.15417	5.94808	5.54531	11.6861	14.41	16.3602	13.9285	6.90535	14.9068	13.8223
B0303.15	CHROMOSOME_III:8717560-8718486	58.4545	57.5289	59.4136	66.1559	85.6313	72.7819	73.6076	74.8722	54.9363	68.3948	68.6879	74.0407	87.0202
B0303.16	CHROMOSOME_III:8705029-8706266	0.127152	0	0	0	0	0.192599	0	0.137313	0	0	0	0	0
B0303.2	CHROMOSOME_III:8684726-8686400	1.00956	1.51508	13.3622	17.4473	19.2261	25.1868	9.95749	25.0663	22.3183	26.202	16.8516	15.6612	10.4588
B0303.3	CHROMOSOME_III:8686036-8688396	167.014	143.098	137.4	98.1243	126.428	128.634	168.14	164.538	155.676	172.034	159.493	218.531	182.41
B0303.4	CHROMOSOME_III:8689768-8693393	68.7019	57.2756	35.1613	24.2978	36.5712	42.5158	49.1584	39.2103	36.8004	40.5732	38.6274	56.0476	58.7311
B0303.7	CHROMOSOME_III:8693556-8699374	26.9555	26.3387	18.6701	17.3778	26.7065	24.1221	37.4295	18.6093	22.5846	15.6888	23.1869	30.2925	24.896
B0303.8	CHROMOSOME_III:8699401-8700254	32.2763	29.8936	6.5969	4.92905	4.9299	5.09746	11.8437	10.5016	10.468	5.9501	6.76773	13.1266	13.0679
B0303.9	CHROMOSOME_III:8700847-8703225	5.66464	6.22742	6.61427	5.0757	10.1465	7.48826	8.20291	11.0578	7.57081	9.57219	9.27054	11.9639	9.6785
B0304.1	CHROMOSOME_II:4519065-4522434	35.2163	43.6667	60.3339	56.7745	79.6273	65.7868	82.2824	101.162	71.8539	93.2454	53.2129	51.6164	69.6669
B0304.2	CHROMOSOME_II:4523611-4524523	58.1428	56.1226	29.507	18.9958	14.9238	21.0765	32.023	22.3092	32.8327	27.3352	14.4048	19.0687	37.4464
B0304.3	CHROMOSOME_II:4512207-4522763	0.18233	0.21563	1.75661	1.49479	2.59122	2.32744	1.10045	2.32423	1.50204	2.32046	2.57389	2.37919	1.77965
B0304.4	CHROMOSOME_II:4522458-4523219	32.3215	24.9607	14.9463	9.31381	11.9971	9.26229	7.21592	9.11641	7.09963	9.20085	14.993	10.513	14.9254
B0304.5	CHROMOSOME_II:4529632-4531961	0.218098	0	0.204472	0	0	0	0.0537786	0.0588352	0.39201	0.169343	0	0	0.143322
B0304.6	CHROMOSOME_II:4534738-4537238	1.86658	1.66674	1.2031	0	1.3672	1.06025	1.84104	1.25926	1.67806	2.17471	1.06788	0.976692	2.29992
B0304.7	CHROMOSOME_II:4541861-4543665	0.0531991	0	0	0	0	0	0	0.114797	0	0	0.486967	0	0
B0304.8	CHROMOSOME_II:4524630-4527897	0.281644	0.51735	0.105619	0	0	0.170645	0	0.0607919	0	0.174975	0.171873	0	0
B0304.9	CHROMOSOME_II:4538984-4540728	0	0	0	0.202376	0.0782043	0	0	0.0575992	0	0	0	0	0
B0310.1	CHROMOSOME_X:493236-497214	0.38889	1.11032	7.46605	8.65838	12.9955	17.1463	2.85137	8.67454	11.4354	9.16225	15.453	10.8911	9.85326
B0310.2	CHROMOSOME_X:501965-506944	102.983	117.576	33.4534	19.1109	27.8582	31.3327	42.2335	34.8977	35.3924	33.1709	21.4022	31.3775	48.6193
B0310.3	CHROMOSOME_X:510899-514483	0.202657	0.20681	0.151996	0	0.0593753	0.122787	0.23986	0.131046	0.291047	0.125729	0.494681	0.169665	0.10654
B0310.5	CHROMOSOME_X:525928-530177	2.85981	2.6504	8.26227	8.73937	16.0309	22.6314	3.68415	12.2534	15.5958	13.3839	21.7257	8.9173	14.0373
B0310.6	CHROMOSOME_X:530625-530962	0	0	1.93287	7.8156	9.06057	17.1756	0.508365	1.15721	1.92758	3.33075	14.1539	2.15755	1.35483
B0331.1	CHROMOSOME_V:9654680-9657925	0.0338701	0	0.127016	0.128399	0.248086	0.307821	0.0668134	0.255372	0	0.105004	0.310036	0	0.0890307
B0331.2	CHROMOSOME_V:9658906-9661590	0.0641922	0.0327538	0.180545	0.121674	0	0.0972327	0.0633138	0.138262	0.115153	0.298466	0.293797	0.134355	0.0843674
B0334.1	CHROMOSOME_II:11485445-11486710	0.501145	0.321355	9.73283	32.7806	38.1692	73.2407	8.63679	18.3751	28.4389	10.9628	63.8301	47.9573	27.2679
B0334.10	CHROMOSOME_II:11518423-11519507	0	0	0	0	0	0	0	0.144793	0	0	0	0	0
B0334.11	CHROMOSOME_II:11493166-11495250	68.0741	56.8911	24.3141	12.4172	17.7954	18.5178	27.3447	35.4061	44.689	37.2163	23.3393	30.062	37.8193
B0334.13	CHROMOSOME_II:11488222-11489555	0	0	7.55705	56.5874	52.2625	60.5957	1.0306	22.4144	44.3702	22.4398	54.1998	14.9964	19.6187
B0334.15	CHROMOSOME_II:11496713-11499556	375.651	392.002	268.457	300.265	353.873	314.961	563.689	240.22	243.05	231.24	266.402	292.531	360.492
B0334.2	CHROMOSOME_II:11483136-11485295	0.369015	0.107583	0	0.299734	0.617747	1.11779	0.10398	0.284413	0.748633	0.215586	0.321666	0	0.555568
B0334.3	CHROMOSOME_II:11489540-11492957	54.4164	49.2333	62.4435	49.1767	76.135	87.7989	66.2406	88.5836	86.8539	93.1986	88.5438	95.8868	82.2161
B0334.4	CHROMOSOME_II:11495627-11496605	132.117	116.45	71.5041	52.8591	86.4235	80.4912	86.0547	100.471	93.5614	75.5975	76.1571	82.4202	88.5038
B0334.5	CHROMOSOME_II:11496713-11499559	0.00859107	0.0107889	8.91972	0.00386327	13.0931	0.0609556	0.0100059	0.0343722	0.0426487	2.31708	0.297428	21.2187	6.856
B0334.6	CHROMOSOME_II:11510610-11513826	0.432865	0.36142	6.34557	6.11628	10.2035	9.77539	3.72605	5.34315	3.24926	4.27195	9.00524	4.61231	4.24098
B0334.7	CHROMOSOME_II:11515010-11518090	0.113074	0	0	0	0	0.171275	0	0.0610173	0.203275	0	0	0	0
B0334.8	CHROMOSOME_II:11519434-11526998	32.2824	25.5309	12.7014	7.70376	10.5281	13.3289	12.3061	17.34	13.9104	13.8148	10.7871	16.7973	22.52
B0336.1	CHROMOSOME_III:5722803-5727068	54.9242	53.1819	31.5159	17.9354	34.8623	34.7003	36.121	51.1939	31.3566	43.7205	32.752	44.2254	59.0489
B0336.10	CHROMOSOME_III:5705467-5706281	1188.94	1616.36	2371.69	2881.25	1654.48	1629.91	1038.38	1509.13	1844.09	2086.68	1969.73	2231.4	1610.79
B0336.11	CHROMOSOME_III:5706691-5709284	0.12135	0.247675	16.7809	15.0659	26.4431	19.5759	9.81455	12.1625	12.5151	12.223	21.1052	15.4931	12.2807
B0336.12	CHROMOSOME_III:5710016-5710464	0	0	0	0	0	0	0	0	0	0	0	0	0
B0336.13	CHROMOSOME_III:5693990-5695178	79.8823	79.6324	45.668	33.6474	38.3107	33.4507	51.6404	41.7243	60.1961	51.5157	37.3991	46.0005	56.383
B0336.2	CHROMOSOME_III:5716067-5717541	812.027	831.126	653.13	571.764	817.033	836.555	1099.62	662.551	676.246	685.874	874.65	738.367	940.469
B0336.3	CHROMOSOME_III:5711502-5714801	183.74	171.566	102.172	74.9309	111.767	111.277	154.145	119.559	98.1503	102.531	94.9389	121.862	165.716
B0336.4	CHROMOSOME_III:5698389-5702257	17.1965	15.832	16.5694	13.7613	26.9845	23.2142	20.1446	25.886	20.2405	22.5003	22.2541	19.9951	28.1965
B0336.5	CHROMOSOME_III:5692874-5693893	105.301	95.2783	49.6361	27.2638	29.0846	29.8551	53.4936	49.4429	44.0276	42.2902	24.7943	61.1271	73.9265
B0336.6	CHROMOSOME_III:5690061-5692695	58.4477	63.7091	51.6323	35.8836	55.0212	45.9014	55.4179	74.8755	66.7197	81.7063	46.3347	63.002	61.1169
B0336.7	CHROMOSOME_III:5694689-5697320	38.0777	35.9268	18.3127	12.2894	22.0453	19.6371	25.0867	33.1871	28.2627	29.1873	16.3569	28.8593	31.0583
B0336.8	CHROMOSOME_III:5697430-5697964	169.684	167.763	138.482	158.886	130.844	127.587	200.874	157.717	160.813	163.269	151.474	129.455	138.515
B0336.9	CHROMOSOME_III:5702209-5705421	37.2674	33.2442	22.8561	12.3072	22.5309	19.0577	27.3071	33.6704	22.1509	31.0275	20.6377	31.936	33.9038
B0344.2	CHROMOSOME_X:1576629-1590890	0.503342	0.288932	43.4143	48.4187	68.0214	67.4742	15.8607	29.7104	37.1309	34.0304	58.7447	32	26.7924
B0348.1	CHROMOSOME_V:48921-49619	0	0	0	0	0	0	0	0	0	0	0	2.77557	0
B0348.2	CHROMOSOME_V:45462-46923	0	0	4.83419	10.5881	1.88841	7.81039	1.27145	3.35336	3.19185	0	7.86658	23.3832	6.77695
B0348.4	CHROMOSOME_V:20824-43971	7.84288	5.94954	33.5448	35.0409	44.8557	53.5978	23.818	34.3519	31.2167	33.454	42.1253	36.3144	29.1905
B0348.5	CHROMOSOME_V:5689-6511	0.737446	0.250853	7.37465	5.59119	7.08199	11.1702	2.42452	8.41981	13.8774	11.2243	9.00046	5.14493	5.16919
B0348.6	CHROMOSOME_V:6588-7822	193.727	199.061	102.669	63.344	78.6311	65.4167	137.07	72.0467	88.8752	86.045	65.8874	109.116	114.874
B0350.2	CHROMOSOME_IV:5966643-6004847	69.5848	75.6616	311.501	277.659	418.265	371.375	325.486	404.899	259.616	345.846	371.654	367.913	390.517
B0350.3	CHROMOSOME_IV:5965469-5966029	0	0	0	0	0	0	0.653986	0	0	0	0	0	0
B0353.1	CHROMOSOME_III:557514-572134	10.1289	14.3538	82.5267	88.4394	91.7761	99.9463	92.4353	114.231	69.3436	92.0149	67.3387	60.3825	54.6711
B0361.10	CHROMOSOME_III:7285913-7287541	106.151	90.7496	63.0507	51.5394	68.3254	89.4087	67.9542	71.1729	81.006	75.394	96.1047	89.7208	94.7478
B0361.11	CHROMOSOME_III:7277539-7281153	0.0583634	0.148898	0.218868	0	0	0.0884038	0	0.0314188	0	0.0904319	0	0.244309	0.0767068
B0361.2	CHROMOSOME_III:7293567-7308300	51.5812	43.5957	18.7085	12.7675	22.5349	19.5327	22.4534	44.3645	38.7317	39.2036	24.8523	29.8765	35.9795
B0361.3	CHROMOSOME_III:7281339-7283892	23.2884	20.761	15.5962	10.8206	21.1236	22.8533	16.4657	32.0015	18.3311	25.8527	17.5591	26.9033	30.5949
B0361.4	CHROMOSOME_III:7258948-7268422	0.222258	0.136087	0.416745	1.93789	2.34426	4.44388	0.175374	1.53355	2.71412	1.24144	1.76322	1.86075	1.51899
B0361.5	CHROMOSOME_III:7268350-7275334	16.7091	15.4791	32.1345	23.4736	36.597	34.5491	30.8688	32.4006	31.7928	36.3394	45.4362	45.2739	31.7112
B0361.6	CHROMOSOME_III:7275440-7277210	48.2363	47.1116	24.0578	15.1613	26.7067	29.3979	20.6644	36.6704	36.2996	44.3349	19.0789	33.8229	34.7935
B0361.7	CHROMOSOME_III:7283856-7285819	13.2933	10.1836	12.5653	6.90325	16.9662	14.2328	11.8182	12.5558	13.0715	12.4228	14.6686	15.5503	14.1686
B0361.8	CHROMOSOME_III:7287782-7290500	43.1208	38.9105	26.7291	16.2381	30.3618	33.6889	29.2321	23.4442	29.1061	33.162	33.814	38.6971	35.6499
B0361.9	CHROMOSOME_III:7298283-7299579	8.21527	7.00404	15.9889	18.824	32.0672	29.7706	10.7696	10.4334	19.9953	14.8537	38.0759	16.324	14.2141
B0365.1	CHROMOSOME_V:13116487-13120120	3.04862	2.92032	10.1113	7.85007	14.0511	10.8474	13.3467	9.84973	8.24205	11.1264	10.9255	11.2567	10.8486
B0365.3	CHROMOSOME_V:13126391-13129982	93.3847	69.9487	399.154	384.637	549.71	624.535	250.31	234.99	287.841	277.202	604.294	439.389	388.26
B0365.5	CHROMOSOME_V:13131912-13134843	0.0747415	0	48.4904	51.5645	73.137	51.1668	37.1548	44.3663	35.5294	63.2534	62.9316	49.121	55.2074
B0365.6	CHROMOSOME_V:13134925-13138071	0.116524	0.053678	3.0584	5.4185	6.59313	11.3837	1.62177	6.06952	11.4926	10.1069	16.4292	16.6836	6.15467
B0365.7	CHROMOSOME_V:13138965-13150276	0	0	0.170094	0.0967194	0.332226	0.395045	0.0447368	0.310681	0.284121	0.192871	0.397887	0.261066	0.208646
B0379.1	CHROMOSOME_I:10074957-10077739	0.919338	1.64182	7.61346	17.8613	18.5179	37.1342	4.15598	11.0991	18.2119	10.2514	29.9211	12.5072	12.8883
B0379.2	CHROMOSOME_I:10070911-10071819	0	0	0	0	0	0	0	0	0	0	0	0	0
B0379.3	CHROMOSOME_I:10080140-10086280	176.092	156.434	55.4397	32.5337	51.1041	51.4251	116.1	68.9823	56.5209	45.6578	48.0694	67.8178	88.0998
B0379.4	CHROMOSOME_I:10086380-10102001	17.9663	16.4513	23.2884	29.3199	28.7323	61.0103	17.7478	22.7481	27.6698	24.739	29.0963	30.4175	24.4958
B0379.6	CHROMOSOME_I:10097305-10097766	0	0	0.428864	0	0	0	0	0	0	0	0	0	0
B0379.7	CHROMOSOME_I:10072570-10074376	0.208344	0.0812199	0.078118	0	0	0	0	0	0	0	0	0	0
B0391.10	CHROMOSOME_V:15585677-15592966	0.213043	0.67203	0.856784	0.403814	0.312093	0.998913	1.99622	1.92001	1.14864	0.820102	2.61585	0.89189	1.04103
B0391.11	CHROMOSOME_V:15600340-15602326	0.0236194	0	0.797175	1.07447	0.830415	3.00524	0.0698886	1.45181	2.12131	2.12601	2.16205	0.98871	0.993372
B0391.12	CHROMOSOME_V:15613166-15614949	0	0	0.194768	0	0	0	0	0	0	0	0	0	0
B0391.3	CHROMOSOME_V:15614917-15617592	0	0	0	0	0	0	0	0	0.217816	0	0	0	0
B0391.4	CHROMOSOME_V:15610870-15612572	0	0.0412892	0	0	0.0592708	0.12257	0.0798128	0.218024	0	0	0.246905	0.169366	0.212706
B0391.5	CHROMOSOME_V:15605704-15610361	6.16763	4.69555	8.90291	7.14417	10.4693	5.3384	8.15928	10.4003	6.68335	10.7887	11.6497	14.753	11.8375
B0391.6	CHROMOSOME_V:15602895-15605136	0	0	0.223596	0.16145	0.124778	0.258039	0.151222	0.0183494	0.122259	0.264072	0.207917	0.213932	0.447793
B0391.9	CHROMOSOME_V:15593442-15593780	1.54625	1.57794	3.38252	4.88475	5.28534	6.24568	5.33784	6.94325	1.92758	9.99227	7.86327	12.9452	18.2901
B0393.1	CHROMOSOME_III:4752863-4754048	708.495	904.582	1880.1	1768.91	1883.53	1834.58	1747.57	1386.64	2298.45	1814.13	1882.88	1815.27	1609.62
B0393.2	CHROMOSOME_III:4754396-4756984	71.9114	57.6907	26.1897	14.1897	23.8933	26.3839	23.9699	31.9165	26.701	23.3922	26.1119	36.2659	46.8143
B0393.3	CHROMOSOME_III:4757212-4759696	318.637	282.547	92.1013	39.8102	61.0056	70.7859	110.713	111.018	113.253	88.5861	59.8174	104.675	157.575
B0393.4	CHROMOSOME_III:4759706-4763574	1.23212	0.977955	0.330041	0.0370703	0.0573003	0.0592479	0.11574	0.0841563	0	0.0605561	0.0596742	0	0.154226
B0393.5	CHROMOSOME_III:4765782-4776242	0.440297	0.211445	30.1741	24.2514	50.2532	41.5847	21.3177	39.5503	20.5013	36.5474	39.9873	30.4109	34.891
B0393.6	CHROMOSOME_III:4780123-4781946	80.8064	76.9528	30.9692	11.4453	13.9448	15.8176	33.3868	15.0376	17.8461	11.4539	18.7492	28.9933	53.9653
B0393.7	CHROMOSOME_III:4776228-4778030	0.0677962	0	0	0.257009	0.397265	0.205383	0.0668686	0	0.487996	0	0.413723	0	0.178209
B0393.8	CHROMOSOME_III:4751842-4752335	30.9565	35.4607	42.0826	28.3115	26.9259	24.6174	25.5332	12.7247	12.1522	12.8188	29.2812	36.9315	25.2253
B0393.9	CHROMOSOME_III:4778354-4780123	0.427631	0.531885	3.80869	5.26862	10.1672	4.08342	1.79256	4.51981	8.16322	6.09091	11.0009	4.62378	2.24814
B0395.1	CHROMOSOME_X:16017446-16021677	0.13048	0.0998656	4.15916	3.64796	7.26345	6.81858	3.7965	6.11285	1.87259	6.87599	4.87702	6.69084	6.08787
B0395.2	CHROMOSOME_X:16030733-16034744	0.0678402	0.0346153	25.3135	20.6384	37.0194	34.9379	11.007	19.2909	15.9448	22.5042	32.3948	18.7427	22.4688
B0395.3	CHROMOSOME_X:16034974-16039442	29.7735	32.1546	60.8245	49.8773	70.5951	61.8191	84.6418	52.8833	49.4916	56.0849	73.0036	81.6333	62.003
B0399.1	CHROMOSOME_V:19565355-19606090	0.0610364	0.0628707	3.14603	5.71588	4.95251	9.94277	1.4443	2.71575	2.81531	2.87954	6.2227	2.42582	2.64599
B0399.2	CHROMOSOME_V:19550985-19555842	0	0.0259417	0.905637	0.433655	0.782029	4.85166	0.0752188	1.69635	1.36725	1.26002	1.47373	1.80899	0.601387
B0403.2	CHROMOSOME_X:7050583-7055330	0.450595	0.255461	1.83058	1.47092	2.2003	2.57842	0.962931	2.07456	2.15416	2.09378	3.05526	1.57183	2.36886
B0403.3	CHROMOSOME_X:7061804-7063286	0.149729	0.0763985	0.561496	0.851414	0.548352	0.907183	0.29536	0.404637	0.269603	0.465861	0.456856	1.56691	0.78715
B0403.4	CHROMOSOME_X:7066300-7068519	528.334	643.943	463.428	319.655	444.21	453.005	572.562	608.928	578.746	600.721	405.97	583.483	560.322
B0403.5	CHROMOSOME_X:7057763-7061638	0.0278215	0	8.0858	17.5078	26.1248	37.4217	2.8264	22.9423	35.9203	23.1033	32.3429	23.2922	14.9919
B0403.6	CHROMOSOME_X:7071345-7075293	0.0635758	0.0648787	0.715246	0.723031	1.1176	1.34819	0.188118	0.686565	0.457448	0.592836	2.13382	0.798387	1.1698
B0410.1	CHROMOSOME_X:2894563-2895235	0	0	0	0	0	0	0	0	0	0	0	0	0
B0410.2	CHROMOSOME_X:2885858-2890593	97.8439	95.0344	52.9083	39.4152	47.7268	50.7987	72.7288	92.5361	71.7561	82.6586	53.8455	67.1132	73.6484
B0410.3	CHROMOSOME_X:2890565-2891483	2.31939	2.94073	23.1945	37.5684	52.5104	56.8501	11.7849	10.1768	15.9396	11.5854	63.6929	27.3617	12.7477
B0412.1	CHROMOSOME_III:816239-821723	0	0.0450543	1.42178	1.48108	2.13433	1.60508	1.07445	2.44646	1.40671	3.01411	3.04805	2.54989	1.04453
B0412.2	CHROMOSOME_III:811821-813758	0.0634827	0.129568	0.714199	1.0228	0.418488	1.73084	2.00366	1.40148	0.227752	0.295159	3.58345	4.11895	1.08466
B0412.3	CHROMOSOME_III:795130-809434	49.384	45.4115	29.1795	17.5201	24.6242	25.6797	30.4239	40.4511	30.6848	35.2156	20.0332	36.6464	36.3394
B0412.4	CHROMOSOME_III:794288-795072	3319.15	3153.84	5736.73	10564.1	3462.88	5504.43	7281.9	5438.04	5214.49	4384.84	5780.07	3132.62	2850.15
B0414.1	CHROMOSOME_I:5801874-5803269	0.107518	0.0548609	0.201602	0	0	0	0	0.0580054	0	0	0	0.225036	0
B0414.2	CHROMOSOME_I:5776156-5788612	0.667642	0.788902	3.75558	5.32836	4.68433	7.98384	2.84198	5.52649	3.65699	4.1401	6.96912	3.23603	5.7267
B0414.3	CHROMOSOME_I:5774587-5775613	1735.75	1369.31	577.839	244.295	219.581	322.188	644.361	305.178	631.119	289.13	213.657	417.043	530.321
B0414.5	CHROMOSOME_I:5788633-5791755	115.571	96.3089	23.7467	10.6801	15.7323	20.9757	30.7491	19.5682	31.5823	17.3889	15.0366	24.104	41.508
B0414.6	CHROMOSOME_I:5792326-5795124	30.7604	25.9607	8.15904	3.91898	5.61788	5.29111	8.34634	11.8772	9.57011	10.5022	4.5301	9.83346	15.4639
B0414.7	CHROMOSOME_I:5795406-5801302	35.1972	28.7815	21.5048	15.1205	28.5766	26.867	29.5312	41.8279	25.5034	26.5224	30.5618	36.0782	42.1103
B0414.8	CHROMOSOME_I:5803961-5807294	11.5072	11.5108	13.8154	10.8192	16.6743	19.7035	25.7545	16.885	21.8483	17.6326	20.7474	23.3228	22.0298
B0416.1	CHROMOSOME_X:9303664-9310424	0.362474	0.153063	8.60115	6.63362	14.7215	18.0995	9.02415	11.6371	5.6406	7.67744	10.259	6.64481	10.1522
B0416.2	CHROMOSOME_X:9299111-9300072	0	0	0	0	0	0	0	0	0	0	0.32394	0	0
B0416.3	CHROMOSOME_X:9291591-9293587	0.0596946	0.060918	0.559651	0.905184	0.787033	1.62756	0.353267	0.515545	0.429375	0.185485	1.27499	0.999528	0.941476
B0416.4	CHROMOSOME_X:9278902-9279887	54.6485	51.0438	14.2619	11.5963	14.7758	10.0184	17.7767	41.0496	33.965	37.8395	13.1176	28.0325	36.7271
B0416.5	CHROMOSOME_X:9268572-9270794	249.047	266.16	160.137	105.158	189.332	176.061	249.823	174.774	166.382	173.317	175.75	213.829	226.396
B0416.6	CHROMOSOME_X:9293606-9296563	4.83643	6.86011	10.1522	8.64838	18.8043	14.5595	11.6107	15.1648	9.60214	14.2352	16.8918	17.6987	19.9091
B0416.7	CHROMOSOME_X:9296885-9297891	0	0	0.769783	1.59614	1.2336	1.02042	0	0	0	0.646063	2.5694	0.859242	0.539558
B0432.1	CHROMOSOME_II:297398-299527	1.03668	0.836365	0.291676	0	0.341819	0	0.496965	0.588693	0	0.968238	0.949277	0.651162	0.204448
B0432.10	CHROMOSOME_II:283886-286275	22.7115	32.3376	21.6983	15.2721	17.1107	15.3988	29.0146	30.6328	26.0473	34.0922	15.5097	29.6532	29.5647
B0432.11	CHROMOSOME_II:293863-294642	0	0	0	0	0	0	0	0	0	0	0	0	0
B0432.12	CHROMOSOME_II:296274-297017	0	0.124442	0.228648	0	0	0	0	0	0	0	0	0	0
B0432.13	CHROMOSOME_II:276211-282576	47.8518	46.5465	18.4609	12.4126	20.0722	18.8995	38.593	46.4464	30.9992	30.8396	16.7749	31.2148	38.6126
B0432.14	CHROMOSOME_II:264352-265841	0.521935	0.798947	0.978654	2.47326	0	2.37175	0.257396	1.72071	4.777	1.65088	0.796271	1.09241	1.37195
B0432.2	CHROMOSOME_II:290580-291861	197.806	168.443	96.1766	66.4416	68.9001	66.6717	121.226	108.845	121.254	123.508	61.4652	86.9972	89.1081
B0432.3	CHROMOSOME_II:288936-290399	25.3073	27.8625	41.3493	46.1791	38.7867	31.1055	37.6321	58.2017	49.7236	80.0579	40.2297	54.6563	47.2321
B0432.4	CHROMOSOME_II:286624-288850	132.645	123.577	68.725	53.2271	94.1229	77.8931	77.1284	106.536	92.0362	95.6827	66.2489	94.6579	124.409
B0432.5	CHROMOSOME_II:257818-261063	1.45497	0.95817	1.06067	1.68441	2.12477	2.56176	0.601739	1.2624	2.69324	1.30907	2.28275	0.981248	0.988228
B0432.6	CHROMOSOME_II:266446-269280	20.1679	16.5926	22.5722	17.4837	25.8036	29.3645	21.1255	26.3116	15.9203	21.1985	17.65	30.9768	32.7394
B0432.7	CHROMOSOME_II:269389-273966	17.5293	14.9979	19.791	14.6883	20.8251	23.3948	19.7141	22.3782	16.0027	18.131	21.3617	21.1408	27.6744
B0432.8	CHROMOSOME_II:276425-278738	13.151	11.6368	5.81525	3.53794	4.38736	3.87502	3.47188	8.96456	8.6015	6.40301	6.20531	6.98165	6.36474
B0432.9	CHROMOSOME_II:280555-283697	4.42848	3.75621	2.52591	2.70361	2.32342	2.45363	2.56421	5.04271	3.68592	6.06481	2.90904	6.19101	3.00405
B0454.1	CHROMOSOME_II:3056643-3060251	68.4555	67.7583	28.8398	18.7509	22.0557	24.6397	28.5958	47.882	51.8325	48.7005	20.2704	22.9725	37.393
B0454.10	CHROMOSOME_II:3046221-3048157	0	0	0.29753	0.401025	0.232452	0.801177	0.0521694	0.285332	0.190112	0.164253	0.322777	0	0.278068
B0454.2	CHROMOSOME_II:3051005-3052325	0.0596172	0.243355	0.44714	0.226003	0.0873346	0.180606	0.117603	0.0643591	0	0.185242	0.181906	0.249558	0
B0454.3	CHROMOSOME_II:3048680-3050438	0	0	0	0.0983326	0	0.15716	0	0	0	0	0	0	0
B0454.4	CHROMOSOME_II:3044325-3046118	0.0569573	0	0	0.21592	0.083438	0	0	0.122947	0	0	0.347579	0	0
B0454.5	CHROMOSOME_II:3038861-3040825	0.11131	0.567956	2.08711	3.79769	1.30449	1.68603	2.5251	1.0864	0.402142	1.04232	0.679264	3.26162	2.34071
B0454.6	CHROMOSOME_II:3032782-3036125	0.622494	0.741126	6.71143	4.52299	6.49733	7.30748	2.66057	3.74098	3.99926	3.85703	8.70544	7.60015	4.90885
B0454.7	CHROMOSOME_II:3020563-3023434	0.0435255	0	0	0	0	0.131857	0.0429299	0	0.156315	0	0.199209	0.182198	0
B0454.8	CHROMOSOME_II:3040942-3043409	0	0.0816647	0.450151	0.859538	1.28954	3.15158	0.0526199	2.21094	10.2353	3.05788	1.872	6.3647	1.192
B0454.9	CHROMOSOME_II:3052377-3054351	31.7189	34.079	20.3485	12.7806	10.9882	14.9876	18.2594	35.8596	46.9832	36.5083	13.8781	19.8746	22.9677
B0457.1	CHROMOSOME_II:8896779-8908592	132.817	111.141	99.3127	59.5083	80.7004	97.3782	71.5995	120.301	66.3293	99.6063	78.6978	101.525	163.04
B0457.2	CHROMOSOME_II:8924509-8926517	0.194349	0.0991659	1.63986	5.52569	5.7653	13.6888	0.622991	6.23573	9.60137	5.73132	10.3775	5.8982	3.44833
B0457.4	CHROMOSOME_II:8910851-8911968	0	0.0688808	0	0	0	0	0	0	0.242916	0	0	0	0
B0457.6	CHROMOSOME_II:8922389-8924311	3.38743	2.83956	28.5821	49.7605	62.5607	46.5453	17.8986	23.8983	31.4963	20.7869	86.3777	54.1871	27.9844
B0462.1	CHROMOSOME_V:18324993-18328763	0.53724	0.246712	0.654778	0.0509157	0.787017	0.732388	0.291439	0.665056	0.577978	1.08195	1.22943	0.787112	0.98853
B0462.3	CHROMOSOME_V:18318566-18319748	30.1514	44.7992	11.285	4.36179	9.85389	13.0488	14.5493	19.6816	29.0705	17.7831	7.92163	21.4885	20.9385
B0462.4	CHROMOSOME_V:18329083-18331151	7.10816	3.86871	7.10834	28.2937	44.7756	9.33125	141.62	2.59827	0.865593	5.9828	27.4722	28.763	1.86844
B0462.5	CHROMOSOME_V:18322186-18323299	0.159609	0.0814397	0.149637	0.30253	0.350721	0.241761	1.02326	0.258915	0.575037	0	0.974003	1.00218	0.629318
B0464.1	CHROMOSOME_III:9489077-9491152	144.611	131.139	88.3093	52.9439	92.717	87.7946	114.739	111.199	105.097	120.587	84.0717	111.437	117.827
B0464.2	CHROMOSOME_III:9491219-9497236	144.399	134.019	65.9301	46.0925	74.0714	65.3896	104.754	132.3	87.3112	93.6122	59.5576	126.795	150.306
B0464.3	CHROMOSOME_III:9488533-9489102	571.102	584.26	969.032	1523.37	852.632	874.095	640.404	511.026	371.923	354.039	943.9	402.036	292.199
B0464.4	CHROMOSOME_III:9469841-9485367	17.5813	13.8674	14.0924	10.5682	18.4265	29.6265	5.89058	11.7243	15.3688	13.6289	18.4193	18.6207	21.1546
B0464.5	CHROMOSOME_III:9456478-9462921	134.135	132.514	127.149	105.918	165.699	163.932	184.89	171.305	144.746	146.952	151.571	162.228	201.462
B0464.6	CHROMOSOME_III:9462899-9465881	171.049	160.822	57.9805	29.9401	48.7182	53.9406	98.2071	86.8307	84.147	78.386	44.8748	77.708	101.755
B0464.7	CHROMOSOME_III:9467372-9467982	943.116	943.989	514.085	470.433	377.607	347.399	542.606	601.03	597.555	488.785	334.904	622.233	682.305
B0464.8	CHROMOSOME_III:9468071-9470450	72.5576	60.0916	30.4459	15.1785	24.0239	24.752	31.609	50.4011	44.2197	49.0557	19.9292	50.4033	63.0391
B0464.9	CHROMOSOME_III:9465688-9467064	65.4401	60.3	31.9329	18.1912	22.1226	19.6678	37.5389	28.3588	31.4354	34.4604	20.24	35.4478	38.4592
B0478.1	CHROMOSOME_IV:6957629-6963705	0.613734	0.661107	12.4029	13.1195	21.9773	23.7572	5.7172	10.724	11.9903	13.3191	19.8707	20.2674	14.7882
B0478.3	CHROMOSOME_IV:6963863-6964551	0	0	2.39483	1.72921	2.13831	3.31647	0.359924	4.38061	1.99004	5.73117	5.56722	1.52755	3.83687
B0491.1	CHROMOSOME_II:11348365-11350312	14.2719	21.5981	15.5225	16.4724	21.7852	17.9297	43.3012	27.2429	21.7819	23.5818	25.2594	29.0087	26.3885
B0491.2	CHROMOSOME_II:11336626-11337771	2.51317	2.10872	0.628203	0	1.30896	7.44428	3.30508	0.120475	0	0	0.681443	17.0664	0.73386
B0491.3	CHROMOSOME_II:11338385-11339535	0.233335	0.0793723	0	0	0.11394	0.471248	0	0.420495	0.280169	0.242059	0.23732	0	0.204448
B0491.4	CHROMOSOME_II:11340069-11343466	0.209234	0.142348	4.90405	5.75062	9.91058	10.9869	4.437	6.1418	9.01034	7.35222	7.76747	7.00686	5.40826
B0491.5	CHROMOSOME_II:11343651-11345679	381.694	358.172	238.63	161.782	214.862	212.308	326.528	175.239	233.331	145.247	208.841	274.555	240.571
B0491.6	CHROMOSOME_II:11345880-11347893	26.1985	23.4219	20.8239	20.8683	33.2894	28.6556	33.5421	36.1201	37.2211	35.7613	30.9434	37.129	34.6022
B0491.7	CHROMOSOME_II:11350125-11351311	14.1356	15.4539	14.2823	12.4662	16.9642	16.5548	13.1073	24.5959	16.8772	23.6464	13.4126	22.2856	16.91
B0491.8	CHROMOSOME_II:11358382-11370248	0.0859025	0.135441	1.19197	1.36578	2.06387	3.43523	0.677842	0.683794	1.16965	0.904176	2.35904	0.623937	1.24591
B0495.1	CHROMOSOME_II:7709735-7711391	0	0	0	0.201673	0.0779327	0	0	0.172195	0	0	0.162323	0	0
B0495.10	CHROMOSOME_II:7711817-7718538	0.345668	0.159758	20.7945	23.5204	40.4314	35.5422	16.0696	22.0845	17.4351	22.3609	34.9598	27.3291	23.496
B0495.2	CHROMOSOME_II:7699200-7702251	60.9465	52.5167	21.7878	11.8876	21.165	22.438	32.2384	32.5533	22.6136	20.7885	17.7274	31.9708	40.9105
B0495.4	CHROMOSOME_II:7690655-7693906	0.34706	0.404768	11.3417	10.3375	20.0098	23.3559	5.72149	13.3134	10.7548	13.362	21.7843	16.1883	13.0325
B0495.5	CHROMOSOME_II:7695882-7698454	9.92657	10.2458	10.1363	6.7009	10.08	11.2243	9.48991	14.1773	12.4524	14.1819	9.95917	15.1236	13.0626
B0495.6	CHROMOSOME_II:7698558-7699125	233.651	222.218	170.82	203.457	221.844	158.964	193.871	131.928	104.911	115.848	131.945	130.934	160.844
B0495.7	CHROMOSOME_II:7701894-7705182	128.872	127.559	70.5638	41.062	73.4759	70.3016	81.4904	75.2561	66.4767	63.4845	67.3543	79.2384	90.2365
B0495.8	CHROMOSOME_II:7705481-7707430	127.675	125.389	78.1321	54.9869	80.2575	80.8308	90.953	143.287	116.207	132.4	58.9291	110.679	142.22
B0495.9	CHROMOSOME_II:7707528-7708663	37.8276	35.4886	27.4178	21.0884	36.6947	29.4675	30.0362	37.5208	31.1064	38.5343	23.0841	41.2499	36.9323
B0496.1	CHROMOSOME_IV:7446378-7447452	0.0626228	0	0	0	0	0	0	0.135244	0	0	0	0	0
B0496.11	CHROMOSOME_IV:7433536-7433947	0	0	0.527748	0	0.412316	0.852658	0	0	0	0	0.858793	0	0
B0496.2	CHROMOSOME_IV:7447844-7449363	0	0	0.0764703	0	0	0	0	0	0	0	0.248877	0	0
B0496.3	CHROMOSOME_IV:7424484-7444651	1.1599	0.722702	26.5231	25.3137	42.3239	48.8798	21.128	27.2859	21.1848	23.8024	37.4164	28.9836	28.2096
B0496.5	CHROMOSOME_IV:7420946-7422660	0	0	0.0787772	0.159269	0.615466	0.76366	0.0828772	0.135856	0.452593	0.130343	0.384577	0.351738	0.441745
B0496.6	CHROMOSOME_IV:7419140-7419960	0.179214	0.182887	0.168017	0	0.131267	0.271458	0.088381	0.0969898	0	0	0	0	0.235541
B0496.7	CHROMOSOME_IV:7444622-7445354	0.388025	0	64.7533	74.2839	86.1167	82.8723	24.1111	55.3177	67.7836	54.2931	88.7964	61.7224	56.0978
B0496.8	CHROMOSOME_IV:7449072-7451434	5.1841	4.41938	18.9667	15.9976	30.8866	27.4835	12.1281	28.0497	16.8974	26.3563	24.7878	18.2603	19.3601
B0507.1	CHROMOSOME_V:8776633-8779271	1.15997	1.26266	29.7251	23.4037	37.4596	34.2036	19.8566	21.0862	17.7467	23.3983	35.708	27.6234	23.8507
B0507.10	CHROMOSOME_V:8758797-8760494	0.0749791	0	0.984123	0.994833	1.75741	1.59001	0.813485	1.45414	1.2111	1.27888	3.43168	11.9268	2.8578
B0507.11	CHROMOSOME_V:8771876-8773759	0.0625376	0	0	0.118537	0.183226	0	0	0.0675292	0.224968	0.194367	0	0.261783	0.493158
B0507.2	CHROMOSOME_V:8774309-8776494	11.9901	12.1603	27.5474	20.8328	42.1767	34.4174	40.5882	33.8504	31.3472	41.8871	44.1499	58.7107	39.591
B0507.3	CHROMOSOME_V:8768886-8770854	7.15252	7.34225	12.8669	10.7179	17.5426	19.2736	18.9937	15.1925	7.46672	11.3541	14.5874	8.88177	17.1658
B0507.4	CHROMOSOME_V:8754947-8755737	0	0	0	0	0	0	0	0	0	0	0	0	0
B0507.5	CHROMOSOME_V:8753672-8754851	0	0	0	0	0	0	0	0	0	0	0	0	0
B0507.6	CHROMOSOME_V:8746135-8753044	0.0193597	0	0.0363004	0.073391	0.170163	0.117298	0.0572845	0	0.138761	0.0599428	0.886064	0.89144	0.254444
B0507.7	CHROMOSOME_V:8756467-8758698	0.0502888	0	0.282881	0.0953204	0.147338	0	0	0.162733	0	0.156129	0.153442	0.210509	0.396566
B0507.8	CHROMOSOME_V:8760664-8763172	0	0	0.160788	0.568884	0.690907	0.779334	0.422891	0.415964	0.153972	0.266057	1.70071	8.61496	1.01433
B0507.9	CHROMOSOME_V:8764865-8766016	0	0	0	0.275719	0	0.440671	0.0717366	0.0786072	0.523748	0	0.22192	0.304456	0.955909
B0511.1	CHROMOSOME_I:10667943-10671005	13.7378	14.8956	66.759	60.7587	108.674	68.3226	69.8948	128.072	64.0097	82.6875	66.0197	102.793	109.688
B0511.10	CHROMOSOME_I:10640381-10642272	185.979	168.929	71.3474	48.3336	74.1065	77.1229	96.768	73.7743	108.781	81.5149	74.8508	92.6279	97.9587
B0511.11	CHROMOSOME_I:10648589-10654168	1.35004	0.612313	1.35007	0.852981	1.40636	1.99948	0.887711	1.61515	1.72184	1.85954	0.549236	1.25584	1.89264
B0511.12	CHROMOSOME_I:10654286-10661591	43.6122	42.5746	33.9235	25.6298	44.4821	43.3711	53.319	47.6374	28.5282	37.996	35.5991	42.5011	52.2825
B0511.13	CHROMOSOME_I:10633178-10636006	31.5062	28.5393	13.6626	9.61762	10.6742	9.83054	13.9081	19.9787	12.2745	16.1816	11.0714	18.5232	26.9077
B0511.14	CHROMOSOME_I:10662515-10666866	19.8347	17.6527	22.3146	17.3373	27.0526	22.7338	35.6424	33.2874	18.5184	27.4639	19.9529	25.7471	40.0789
B0511.2	CHROMOSOME_I:10651018-10652951	1.78285	2.59913	1.13881	0.779843	0.774914	1.18704	1.70049	1.09784	0.445448	1.15457	0.956464	1.96828	1.90545
B0511.3	CHROMOSOME_I:10646750-10647766	0	0	0	0	0	0.420062	0.0683817	0	0	0	0.211542	0	0
B0511.4	CHROMOSOME_I:10644272-10645606	0.291832	0.0496354	0.273599	0	0.213755	0	0.0959463	0.0524568	0	0.150985	0	0	0
B0511.5	CHROMOSOME_I:10628731-10631662	0.172583	0.352239	6.36416	16.138	18.2031	33.1124	1.70222	10.4315	26.0637	13.4038	28.2603	10.8365	13.1559
B0511.6	CHROMOSOME_I:10624452-10628376	148.008	169.204	137.341	88.1728	125.396	124.644	212.826	245.242	207.134	260.979	109.362	204.232	195.075
B0511.7	CHROMOSOME_I:10631639-10633141	152.796	144.507	73.4451	45.6723	59.6391	51.0281	73.0439	105.813	115.176	119.553	52.9632	80.3094	103.262
B0511.8	CHROMOSOME_I:10636681-10638966	15.0929	13.8804	24.3796	20.9555	30.1746	26.9908	28.1418	41.7217	26.7824	38.9084	27.2978	33.377	33.7705
B0511.9	CHROMOSOME_I:10639074-10640219	200.728	189.316	108.298	70.3325	96.4608	90.7494	146.131	114.477	121.404	111.582	71.265	116.336	126.167
B0513.1	CHROMOSOME_IV:13888063-13893956	256.338	273.053	177.266	131.739	197.735	184.922	283.471	160.594	140.732	142.477	197.389	135.039	188.673
B0513.2	CHROMOSOME_IV:13882706-13884152	258.073	257.705	112.294	85.0723	90.1109	70.287	105.148	225.98	178.509	230.839	50.2339	141.81	200.158
B0513.3	CHROMOSOME_IV:13882168-13882638	5665.28	7510.78	23491.2	31015.4	12268.6	15322	13179.7	21142.8	17612.1	17457.9	18554	12416.4	13148.7
B0513.4	CHROMOSOME_IV:13880112-13881517	0	2.74199	1.79358	0.748116	2.32459	0.597842	0.778578	0.862923	0	0.620697	3.01072	0.826087	38.1155
B0513.5	CHROMOSOME_IV:13868528-13876592	1.47009	0.397179	1.76769	3.15195	5.35975	11.2518	0.683947	3.57942	5.06359	4.46915	5.49524	4.99042	2.69636
B0513.6	CHROMOSOME_IV:13854329-13857326	0.297745	0.552448	0.0253766	0.0256527	0.0396521	0.0819996	0.120138	0.131119	0.0485346	0.0838653	0.0825897	0.0566528	0.1423
B0513.9	CHROMOSOME_IV:13860118-13865269	0	0.317853	4.08646	8.86644	4.22962	13.9354	1.53553	5.24905	8.01259	6.92292	11.6385	5.21256	8.18258
B0523.1	CHROMOSOME_III:8671622-8673545	0.585259	0.597253	0.0731592	0	0.114315	0.118201	0.0769669	0.0840893	0	0.484064	0.238101	0.163326	0.307681
B0523.3	CHROMOSOME_III:8670463-8674970	13.2405	13.2012	5.4219	2.827	3.52255	5.16374	3.2123	5.70286	4.91344	4.90544	3.8078	4.7143	5.84066
B0523.5	CHROMOSOME_III:8675216-8683612	30.8252	30.4045	23.1669	13.4849	28.275	29.2997	28.4208	44.0508	21.1046	27.2855	24.4369	36.2126	43.8192
B0524.2	CHROMOSOME_III:1894092-1899847	0	0	0	0	0	0	0	0.0529635	0	0	0	0	0
B0524.3	CHROMOSOME_III:1887548-1889682	0.030888	0	0	0	0	0.093573	0	0.066522	0	0.095734	0	0	0
B0524.4	CHROMOSOME_III:1883597-1886209	0	0	0	0.0411894	0	0	0	0	0	0	0	0	0
B0524.5	CHROMOSOME_III:1891373-1893833	0	0.128534	0	0	0	0	0.372689	0	0	0	0	0	0
B0524.6	CHROMOSOME_III:1902183-1905631	35.9067	33.4205	25.4713	16.8409	32.0552	30.4753	31.1424	23.5716	19.5656	15.762	23.077	19.3645	24.1268
B0545.1	CHROMOSOME_IV:92015-110924	15.8312	14.835	44.3894	47.2488	73.0038	84.1109	37.194	38.9468	46.2444	41.1546	69.925	58.4447	49.3315
B0545.3	CHROMOSOME_IV:86874-90082	0.105786	0	0	0	0	0	0.104339	0	0	0	0	0	0
B0545.4	CHROMOSOME_IV:109053-109943	0	0.0831728	0.764106	0.463453	0.119396	0	0.160775	0.176309	0	0.253733	0.248682	0	0.214236
B0546.1	CHROMOSOME_IV:3385634-3386904	1134.96	979.408	938.281	903.284	783.688	696.414	678.129	669.95	718.307	796.94	677.719	594.764	531.141
B0546.2	CHROMOSOME_IV:3373390-3378129	164.024	156.142	69.4146	50.4796	69.8516	68.6678	99.5868	88.9436	104.179	82.9907	71.4487	81.291	114.043
B0546.3	CHROMOSOME_IV:3378787-3382831	5.1553	4.96456	12.049	12.1801	12.5514	18.0372	15.2901	18.7349	14.8543	13.9595	17.9455	16.2611	14.2192
B0546.4	CHROMOSOME_IV:3382944-3384144	39.1649	33.4295	43.5553	48.7699	58.2276	68.6874	44.9517	49.165	57.4515	59.3975	68.0466	35.8151	33.882
B0546.5	CHROMOSOME_IV:3388072-3390084	0	0.0181806	0	0	0	0	0.0263577	0	0	0.0553266	0	0	0.0468298
B0547.1	CHROMOSOME_IV:5649519-5651070	65.1183	74.2626	47.6027	37.6106	49.6099	41.9254	71.2332	72.8316	70.6171	82.7707	44.8837	62.3437	66.6127
B0547.2	CHROMOSOME_IV:5645819-5646222	0	0	0	0	0	0	0	0	0	0	0	0	0
B0547.4	CHROMOSOME_IV:5643240-5645603	0	0	0	0.108362	0.0837494	0.173192	0	0.123408	0	0.1776	0.348876	0	0
B0554.1	CHROMOSOME_V:438401-438675	0	0	0	0	0	0	2.07633	0	0	0	0	0	0
B0554.2	CHROMOSOME_V:434768-436727	0	0.0325718	0.0598472	0.0604986	0	0	0.062962	0	0	0	0	0	0
B0554.3	CHROMOSOME_V:434148-434402	0	0	0	0	0	0	0	0	0	0	0	0	0
B0554.4	CHROMOSOME_V:430612-433575	0.0335243	0.0342112	0.565735	0.190631	0.0982209	0.101559	0.198393	0.288865	0.360873	0	0.10229	0.420998	0.0881215
B0554.5	CHROMOSOME_V:424440-426561	0	0	0	0.064724	0.100045	1.24135	0.0336797	0.0367808	0	0.105865	0	0.142939	0
B0554.6	CHROMOSOME_V:422498-424167	0.0471419	0	0.176787	0.268066	0.345297	0.142813	0	0.0508359	0.508067	0	0.287681	0.197336	0.247833
B0554.7	CHROMOSOME_V:437576-441024	0.469737	0.958729	0.338762	0.273959	0.317598	0.437857	0.427671	0.233565	0.129684	0.112044	0.110252	0.302512	0
B0563.1	CHROMOSOME_X:9171504-9172147	30.521	29.5826	6.22567	2.6626	4.11565	3.09493	8.56498	13.4529	16.1711	7.18534	2.72755	6.94934	11.0774
B0563.10	CHROMOSOME_X:9166690-9167199	0.543064	0	0	0	0	0	0	0	0	0	0	0	0
B0563.2	CHROMOSOME_X:9163106-9165912	0.367721	0	13.2152	11.0358	11.2674	12.0682	5.74258	11.5799	7.27466	10.8561	17.578	12.8273	11.7601
B0563.4	CHROMOSOME_X:9150634-9160597	43.1989	41.3155	60.5542	53.4998	89.498	78.5522	53.6714	59.3878	69.1918	63.506	85.6442	72.2886	68.2957
B0563.5	CHROMOSOME_X:9146058-9147498	0	0	0.312356	0.947263	1.46421	0	0	0.363081	1.81437	0.522523	1.52487	1.39465	0
B0563.6	CHROMOSOME_X:9137869-9145538	2.31798	2.48036	2.83782	3.19705	3.67519	5.28062	4.93515	2.75079	3.92171	3.39833	5.31337	4.50397	2.63408
B0563.7	CHROMOSOME_X:9152377-9154127	0	0	1.26753	1.92198	1.60921	3.32781	1.00012	2.46836	2.13192	1.05253	4.12524	2.82973	1.99904
B0563.8	CHROMOSOME_X:9173627-9174433	110.878	119.678	33.3176	43.1107	27.0714	12.9191	41.3609	58.3049	62.0484	37.2928	15.1807	32.7276	67.2585
B0563.9	CHROMOSOME_X:9168481-9168965	0	0	0	0	0	0	0	0	0	0	0	0	0
B0564.1	CHROMOSOME_IV:13098953-13100592	120.498	117.263	73.8725	53.9797	64.2608	57.7849	123.076	46.1239	37.3809	38.8448	60.3546	49.5774	58.9488
B0564.10	CHROMOSOME_IV:13119071-13124363	20.4235	27.6084	30.2419	25.8168	36.0089	36.4023	26.5262	30.6362	26.7509	27.5641	28.7194	24.6821	32.9103
B0564.11	CHROMOSOME_IV:13105298-13106902	43.5961	36.7511	26.508	20.9167	28.3909	31.4108	51.8112	32.3671	31.2944	24.9563	29.3116	39.3607	42.1195
B0564.2	CHROMOSOME_IV:13107632-13111479	14.8282	17.0657	10.3491	8.7442	10.2577	9.7329	12.3503	15.416	11.8745	16.6713	9.55157	11.0349	11.4767
B0564.3	CHROMOSOME_IV:13108115-13109775	0.143385	0.143989	0.760863	0.835774	1.7132	1.40055	0.678434	1.74793	1.73696	1.96912	2.95344	3.7517	1.55481
B0564.4	CHROMOSOME_IV:13111495-13113058	0.129838	0.220833	0.0405756	0.0410172	0.126802	0.524449	0.106719	0.18662	0.233142	0.402857	0.264111	0.362337	0.170646
B0564.6	CHROMOSOME_IV:13129627-13133206	0.021517	0.021958	5.00241	6.72981	10.0242	13.2331	3.37458	5.38031	7.49573	5.66593	9.1263	5.58466	8.42781
B0564.7	CHROMOSOME_IV:13100688-13104855	15.1784	15.2724	13.6569	11.2359	18.1076	15.7028	19.4016	21.0309	16.872	22.1541	15.8159	26.1491	30.0457
B0564.9	CHROMOSOME_IV:13135219-13138798	0.0167255	0.0170683	3.9515	5.23091	7.7915	10.2857	2.62297	4.19737	5.82134	4.45914	7.09363	4.34081	6.55071
BE0003N10.1	CHROMOSOME_III:1037498-1046264	13.5273	11.6679	8.66009	6.84784	5.92391	9.38999	7.85553	9.31946	9.63783	8.51755	8.26753	6.01486	10.2519
BE0003N10.2	CHROMOSOME_III:1031303-1037202	26.4294	23.0998	21.0453	13.0142	16.6259	15.8612	23.3466	24.6121	18.1084	21.8644	20.28	25.7226	22.4156
BE0003N10.3	CHROMOSOME_III:1046237-1060000	0.947086	1.20158	10.175	8.70896	11.0431	10.5072	11.9038	12.3014	7.28856	13.228	10.1532	9.75054	9.7225
BE10.1	CHROMOSOME_III:12787577-12789376	0.287998	0.17634	0.216005	0	0.0843792	0	0	0.0621702	0	0	0.17575	0	0
BE10.2	CHROMOSOME_III:12793282-12798056	0.37622	0.15997	30.3335	36.1902	55.1132	64.0147	11.0393	33.9303	33.0674	35.1772	71.1716	37.0091	29.3381
BE10.3	CHROMOSOME_III:12807989-12811549	19.0591	20.681	6.78754	2.69957	3.99893	5.8427	5.73605	9.32871	8.30163	7.63218	4.7078	8.69437	9.91129
BE10.4	CHROMOSOME_III:12813413-12816697	5.17161	6.13925	1.58318	0.800209	2.4738	3.51709	1.14508	2.56206	2.65543	1.47487	2.41527	3.09263	1.8033
BE10.5	CHROMOSOME_III:12806108-12806754	2.28722	3.8213	0	0.962303	0.371878	2.84052	0.250366	4.15568	2.76881	2.39188	0.77452	1.06254	2.00166
C01A2.1	CHROMOSOME_I:13408785-13411440	2.13228	3.08855	1.22641	0.792968	1.45419	2.18817	1.96051	3.29056	1.96888	2.33209	1.1481	3.30977	3.18015
C01A2.2	CHROMOSOME_I:13397256-13398517	3.25227	1.83953	166.386	125.467	106.529	87.1503	91.3678	94.3767	89.0923	150.283	174.508	220.418	194.002
C01A2.3	CHROMOSOME_I:13387805-13391439	19.1733	22.6084	24.7895	19.2159	32.873	32.5226	25.6287	29.0436	21.3791	29.4148	27.8298	28.7283	32.3805
C01A2.4	CHROMOSOME_I:13392104-13393990	64.2297	62.9464	53.0291	46.9011	55.8346	57.9803	43.0484	103.049	110.705	102.777	57.4308	100.94	77.094
C01A2.5	CHROMOSOME_I:13384740-13387073	115.764	116.289	71.9458	58.431	75.0686	71.45	102.326	142.824	147.098	175.02	74.7261	104.412	119.234
C01A2.6	CHROMOSOME_I:13379905-13384360	0.0742595	0.682031	0	0.140755	0	0.449927	0.21973	0.160539	0	0	0	0	0
C01A2.7	CHROMOSOME_I:13402435-13404088	2.99808	7.3772	13.7638	18.9607	22.3506	29.6364	5.57022	11.8725	22.7675	12.1604	24.4857	10.2247	9.89642
C01A2.9	CHROMOSOME_I:13376864-13377338	0	3.59938	0	0	0.861156	1.78085	0.579807	0	0	0	0	0	1.54522
C01B10.10	CHROMOSOME_IV:6624359-6627981	0.291899	0.0541603	4.42835	3.2694	7.69699	6.75274	3.08844	8.54065	3.80636	6.49499	6.88229	6.33163	5.7895
C01B10.11	CHROMOSOME_IV:6657967-6660425	0.448669	0.0508737	188.165	169.236	293.724	247.376	162.704	200.782	164.625	216.366	295.093	237.479	208.224
C01B10.3	CHROMOSOME_IV:6619031-6621341	0.500047	0.255147	0.234403	0.631878	1.46507	2.77724	0.493205	1.21269	1.0474	0.775653	5.08586	2.26764	1.53349
C01B10.4	CHROMOSOME_IV:6628341-6631734	0.175648	0.0896237	0.82337	1.38722	1.54387	1.41896	0.866223	1.67052	0.420015	0.725766	2.14377	2.08325	1.46207
C01B10.44	CHROMOSOME_IV:6623678-6624482	0	0	0	0	0	0	0	0	0	0	0	0	0
C01B10.5	CHROMOSOME_IV:6646022-6646928	23.6422	8.86766	4098.2	6353.99	6482.9	4710.29	3121.74	3336.18	3829.02	3346.84	5998.15	2989.9	2999.45
C01B10.6	CHROMOSOME_IV:6640149-6645341	0.139572	0.284889	30.8778	39.0092	59.0763	73.5286	15.9056	23.9459	38.0889	23.6839	60.7724	32.6247	28.6864
C01B10.7	CHROMOSOME_IV:6638544-6639253	0	0	0	0	0	0	0	0	0	0	0	0	0
C01B10.8	CHROMOSOME_IV:6635027-6638147	33.6434	27.1503	11.8456	6.02631	12.304	12.0116	12.3787	13.5925	11.1672	11.4052	11.0846	12.0797	16.5762
C01B10.9	CHROMOSOME_IV:6632210-6634987	22.0377	19.8374	11.7516	7.8231	13.0627	14.1242	13.5945	17.8788	10.8709	15.0749	10.9609	21.5428	22.3006
C01B12.1	CHROMOSOME_II:23327-24457	0.286119	0.356438	1.86478	0.718542	1.10389	2.14138	1.3899	1.04722	1.18769	1.15925	1.17786	8.46028	0.802433
C01B12.2	CHROMOSOME_II:19537-22170	16.2652	19.9407	23.6671	27.2727	44.9053	34.113	53.7175	33.9178	34.605	36.9729	43.4532	40.6669	45.0761
C01B12.3	CHROMOSOME_II:12984-16001	0.129176	0.0790939	4.89266	3.47682	8.70471	6.88739	5.01989	7.95298	3.70556	7.8437	9.5383	12.0042	7.4022
C01B12.4	CHROMOSOME_II:6663-9233	0.0483318	0.197289	0.906243	0.458053	1.13284	1.17133	0.333693	0.781866	0.868243	1.50028	1.0323	1.61854	1.77862
C01B12.5	CHROMOSOME_II:9807-11846	0	0	0.115678	0.233873	0.723007	1.21482	0.121699	0.398595	0.44263	0.478025	0.847078	0.258248	0.324332
C01B12.8	CHROMOSOME_II:23880-25435	25.2709	22.1548	12.6343	9.7281	10.5604	8.03452	14.8144	24.2123	24.7199	26.4845	9.11177	21.9059	23.7753
C01B4.1	CHROMOSOME_V:2517528-2521770	0.322556	0.57604	0	0	0.0787532	0	0.0265119	0.145014	0	0	0	0	0.0706555
C01B4.10	CHROMOSOME_V:2514232-2515592	0.325987	0.277224	0	0	0	0	0	0	0	0	0	0	0
C01B4.3	CHROMOSOME_V:2509634-2513267	0	0.137152	0	0	0	0	0	0.0580054	0	0.0834775	0	0	0.211967
C01B4.5	CHROMOSOME_V:2502762-2504913	0.412504	0.451027	0	0.111698	0.172653	0	0.145308	0.222644	0	0	0.0899031	0	0.23235
C01B4.6	CHROMOSOME_V:2501049-2502425	45.5277	43.4882	9.12107	6.12849	7.46742	6.26522	12.4688	11.4447	14.0358	11.1311	7.4657	9.63262	10.4131
C01B4.7	CHROMOSOME_V:2494233-2499000	2.1404	2.87403	1.37299	0.889702	0.962659	0.739423	2.96297	0.829414	0.876115	0.46581	2.92169	4.00829	1.52994
C01B4.8	CHROMOSOME_V:2490510-2492700	1.04375	1.10318	0.209686	0.141312	0.0546075	0.225854	0.0735333	0.240977	0.0668999	0.288999	0.17061	0.15604	0.0489926
C01B4.9	CHROMOSOME_V:2483002-2487784	11.0344	10.1748	7.35263	5.272	5.98933	8.10371	3.25302	2.97858	4.79788	4.00394	6.44614	7.31658	4.47457
C01B7.1	CHROMOSOME_V:8786528-8792753	21.8897	18.0985	106.604	75.9048	119.584	141.121	74.6318	150.148	87.0433	124.822	99.6607	90.4331	125.51
C01B7.3	CHROMOSOME_V:8783399-8784143	0	0	0	0.446815	0.345326	0	0	0.258473	0	0	0	0	0
C01B7.4	CHROMOSOME_V:8792673-8795545	3.07541	2.8769	10.0114	7.08421	17.9896	15.1397	7.30948	19.7616	10.7937	16.8653	16.0306	15.5557	15.775
C01B7.5	CHROMOSOME_V:8800128-8800974	0	0	2.00495	2.02677	2.34962	7.0185	0.878875	5.83238	1.29534	3.35743	4.35015	1.49201	3.27915
C01B7.6	CHROMOSOME_V:8805393-8819933	0.556615	0.351141	9.34377	7.49653	12.9752	13.594	6.33046	15.058	5.63582	10.4081	12.4814	10.7858	13.5776
C01B7.7	CHROMOSOME_V:8821843-8822536	0.0567547	0	0.106417	0	0	0	0	0	0	0	0	0	0
C01B9.1	CHROMOSOME_II:13771505-13778956	0.151478	0.0721376	1.0132	1.23986	2.11089	2.51775	0.439464	0.957781	1.35778	0.879816	2.71899	1.09753	0.573136
C01B9.4	CHROMOSOME_II:13770769-13783947	1.26803	1.29401	1.1888	2.40348	0.928779	0	1.87601	0	0	0	1.93451	2.65398	1.66656
C01C10.1	CHROMOSOME_X:7431424-7433490	2.31653	0.870952	13.8309	12.3638	19.0218	19.7606	9.80077	12.1764	7.6744	15.5343	17.6707	10.973	10.0953
C01C10.2	CHROMOSOME_X:7435751-7437936	0.43092	0.320584	5.20959	4.57294	7.89849	11.4504	2.68325	6.54418	12.5472	8.16552	14.172	8.31424	6.0897
C01C10.3	CHROMOSOME_X:7439353-7442534	7.30171	5.6515	14.1541	15.1104	21.7546	21.6925	27.7635	15.2374	9.87394	19.4678	26.9072	23.4775	19.3786
C01C10.4	CHROMOSOME_X:7433586-7435662	0.960739	1.23844	20.669	26.9322	37.926	37.53	26.4328	29.29	15.2635	25.2756	43.0457	24.9767	21.3993
C01C4.1	CHROMOSOME_X:3727559-3728424	0.0923068	0.188396	0.865397	2.97438	3.24534	5.03346	1.4567	2.19859	3.99514	2.87641	2.25319	1.15919	1.45582
C01C4.2	CHROMOSOME_X:3716300-3718629	0	0	0	0.225127	0.521976	1.07943	0.0585735	0	0	0.184521	0.1812	0.248591	0
C01C4.3	CHROMOSOME_X:3706728-3713318	0.144682	0.198656	2.29972	2.63609	5.14098	7.14156	1.37276	3.28069	3.1855	2.07576	5.76141	4.52485	2.02044
C01C7.1	CHROMOSOME_IV:12622060-12630999	18.4514	13.6699	44.8634	38.5372	49.6636	53.4868	35.5155	33.8647	30.5106	33.1287	42.7647	43.3473	46.1119
C01F1.1	CHROMOSOME_II:4301608-4305289	154.164	150.16	68.1921	46.3786	84.567	67.6442	111.041	147.071	104.948	100.102	59.7675	129.29	155.257
C01F1.2	CHROMOSOME_II:4299659-4301276	34.6172	39.6806	25.0149	22.4192	22.5445	27.1545	40.9639	37.8737	39.219	36.2295	24.0558	33.4619	40.7412
C01F1.3	CHROMOSOME_II:4295102-4299213	3.62434	4.67972	70.4612	58.536	89.3805	67.8458	56.72	106.996	57.5037	105.991	65.4362	77.1164	75.0741
C01F1.4	CHROMOSOME_II:4276215-4279270	0.733461	0.598794	2.01707	1.76097	3.15176	2.96263	1.44686	1.58211	1.22983	1.51791	1.34277	1.22811	1.79943
C01F1.5	CHROMOSOME_II:4279790-4281830	0.127152	0.324393	13.9473	12.412	17.6023	17.5265	5.07918	11.8776	8.00534	13.0424	15.1308	13.3065	13.8705
C01F1.6	CHROMOSOME_II:4282220-4288212	30.1165	26.9886	21.026	16.7278	27.9047	34.059	26.2284	25.7771	29.0427	23.1967	24.9727	31.3341	42.7211
C01F4.2	CHROMOSOME_I:4850682-4867826	1.98245	2.5327	2.24166	3.04054	2.83763	6.3266	0.865716	2.441	2.92752	2.71666	3.83251	2.21718	3.14254
C01F6.1	CHROMOSOME_IV:9096824-9099472	85.2402	69.0442	23.6982	11.3041	20.5109	29.8864	21.0052	32.62	31.8138	25.7691	22.3387	29.1146	42.7563
C01F6.2	CHROMOSOME_IV:9099247-9101570	0.595867	0.371814	0.372484	0.0625399	0.194537	0.0999551	0.163056	0.250073	0	0.206168	0.304328	0.414671	0.260414
C01F6.4	CHROMOSOME_IV:9104950-9107594	51.3613	42.418	14.069	6.78377	7.86437	12.8871	13.2994	18.5604	14.4164	13.915	11.1118	19.0555	27.5627
C01F6.5	CHROMOSOME_IV:9108915-9109736	496.496	544.497	287.101	219.664	323.06	258.651	311.861	565.176	619.062	576.17	219.028	374.338	360.148
C01F6.6	CHROMOSOME_IV:9119081-9130369	7.36622	7.43741	59.2788	60.76	93.6496	109.854	45.6846	58.9998	67.2662	69.1106	94.1844	77.9781	73.244
C01F6.8	CHROMOSOME_IV:9094531-9095640	59.3836	57.1871	59.9036	43.3823	44.5424	46.0081	76.8826	71.4561	65.2515	67.941	47.9668	61.8825	66.1018
C01F6.9	CHROMOSOME_IV:9095738-9096218	600.685	635.207	716.201	903.109	881.902	571.732	981.771	665.037	646.477	526.624	711.91	522.228	775.522
C01G10.1	CHROMOSOME_V:15099729-15104787	0.0759866	0.103392	0.0949856	0	0.0742097	0.038366	0.149893	0.190619	0	0.235137	0.154569	0	0.199737
C01G10.10	CHROMOSOME_V:15079863-15082462	9.92353	11.9591	8.50785	5.38301	7.84244	7.21898	11.5264	15.6446	13.8203	16.1903	7.76893	14.211	14.0721
C01G10.11	CHROMOSOME_V:15071506-15080135	100.528	92.4393	103.701	85.1323	122.121	140.142	84.4632	85.4096	119.335	92.6672	110.992	152.697	161.477
C01G10.12	CHROMOSOME_V:15068672-15069490	2.68445	3.31018	3.56536	4.45221	8.52043	4.40501	5.07479	7.27829	5.25353	8.37955	4.77799	3.7457	8.23236
C01G10.14	CHROMOSOME_V:15105358-15105910	1.05229	0.165209	0	0.153429	0.237158	0	0.0798381	0.176351	0.293751	0	0	0	0
C01G10.15	CHROMOSOME_V:15086933-15087279	0	0	2.52411	2.55158	0.65734	4.07809	0.44258	0	0	2.88425	1.36914	1.87835	0
C01G10.16	CHROMOSOME_V:15092948-15094321	0	0	1.11488	1.12701	1.74205	0	0.586451	1.51617	0	2.49368	0	0	0
C01G10.17	CHROMOSOME_V:15090739-15091102	0	0	0	0	0	1.21793	0.396532	0	0	0	0	0	0
C01G10.18	CHROMOSOME_V:15088409-15088682	0	0	0	0	0	0	0	0	0	0	0	0	0
C01G10.2	CHROMOSOME_V:15097656-15099537	0	0	0	0	0	0	0	0	0	0	0	0	0
C01G10.3	CHROMOSOME_V:15095031-15097435	0	0	0	0.297347	0.229808	0	0.103151	0.338485	0	0.162375	0.159552	0	0
C01G10.4	CHROMOSOME_V:15089737-15090004	0	1.22853	0	2.28185	0	7.29399	1.18739	0	0	0	0	0	3.16445
C01G10.5	CHROMOSOME_V:15089084-15089482	0	0	0	0	0	3.18869	1.03817	0	0	0	6.42326	0	0
C01G10.6	CHROMOSOME_V:15087638-15088319	0	0	0	0	0.352518	0.729	0.712042	0.263971	0	0	0.734245	1.00732	0
C01G10.7	CHROMOSOME_V:15085729-15087047	7.40316	8.62089	8.68643	7.23139	7.71796	7.29232	13.3046	10.2346	12.5617	16.35	9.4235	12.3578	10.3866
C01G10.8	CHROMOSOME_V:15084040-15085368	326.495	303.516	194.155	138.306	159.408	160.194	221.66	270.094	302.524	336.572	171.107	304.064	227.175
C01G10.9	CHROMOSOME_V:15082746-15084074	13.1256	19.0523	15.5486	13.0233	15.8267	16.0775	16.4512	26.5715	17.0232	26.0326	18.3619	25.786	24.4128
C01G12.1	CHROMOSOME_II:14573539-14576487	1.79537	2.10698	20.8716	20.0212	28.6678	27.8291	13.8122	25.5495	21.5742	30.5096	22.3687	15.9076	18.9557
C01G12.10	CHROMOSOME_II:14580255-14580968	2.37442	0.606274	1.11396	5.06667	2.17578	7.19894	0.800043	0.68003	6.70642	1.93137	0	0	2.66358
C01G12.11	CHROMOSOME_II:14580817-14581202	2.13535	1.50861	1.23196	1.66049	3.12811	3.31737	1.29608	3.26829	1.20979	1.04523	0	1.37517	3.74196
C01G12.13	CHROMOSOME_II:14576881-14578000	0	0	0	0.137208	0	0	0.0713975	0.156467	0	0	0	0	0
C01G12.2	CHROMOSOME_II:14578209-14578522	0.317006	0.323503	0	6.80986	5.57267	16.0057	1.25067	7.54179	2.39285	2.06736	3.86903	0	1.38879
C01G12.3	CHROMOSOME_II:14581389-14582285	45.4999	52.7509	15.4797	9.7801	8.79556	9.94711	12.1215	30.3728	14.8901	26.8988	13.1674	20.0281	36.0034
C01G12.5	CHROMOSOME_II:14586451-14587432	0	0	0.948622	1.09594	0.211752	0	0	0.390548	0	0	0	0	0
C01G12.6	CHROMOSOME_II:14587881-14588186	0	0	1.3018	10.747	8.13647	23.8368	0	3.9503	0	4.548	0	0	2.43328
C01G12.7	CHROMOSOME_II:14588545-14591818	0.0260845	0	0.782553	0.988842	0.534965	1.42237	0.308731	0.842296	1.02889	0.888931	1.83056	1.0919	0.617088
C01G12.8	CHROMOSOME_II:14593448-14597565	1.76233	1.29362	0.173918	0.0293018	0.0679387	0.187327	0.0304949	0.415603	0.055382	0.239244	0.141507	0.258845	0.365718
C01G12.9	CHROMOSOME_II:14578943-14580023	0.0733117	0.224442	0	0	0	0	0.0723087	0	0	0.228069	0	0.306884	0.578119
C01G5.2	CHROMOSOME_IV:6526712-6529791	2.94098	2.8247	3.20777	3.60702	3.40723	4.71679	2.86282	4.38366	2.68656	2.67821	3.2258	2.8967	3.48637
C01G5.3	CHROMOSOME_IV:6536167-6538989	1.03165	0.816825	0.533627	0.303432	0.911988	0.592733	0.947363	1.16885	0.510681	0.716974	0.759815	1.19131	1.96372
C01G5.4	CHROMOSOME_IV:6531738-6535666	0.0288056	0.058792	0.0810179	0	0	0	0	0.0154869	0.0515936	0	0.0439462	0.120581	0.0378591
C01G5.5	CHROMOSOME_IV:6524596-6526485	38.4808	25.2574	9.9445	8.15392	8.80533	7.14087	9.64839	14.122	16.3179	12.0842	7.55186	13.3206	19.6724
C01G5.6	CHROMOSOME_IV:6522862-6524557	154.162	174.638	71.83	42.7171	69.1717	68.8586	76.1975	101.053	122.255	114.976	54.3746	90.374	121.984
C01G5.7	CHROMOSOME_IV:6518162-6519023	0	0.229987	3.80319	5.55328	5.61251	4.77916	2.00056	4.93772	4.11241	5.68483	6.8765	1.88679	2.3696
C01G5.8	CHROMOSOME_IV:6548839-6552556	18.9886	17.7705	7.67073	3.46538	7.63702	7.84175	11.373	12.169	9.14584	7.00512	6.4069	13.4119	17.1294
C01G5.9	CHROMOSOME_IV:6519963-6522292	0.118664	0.282556	4.895	4.57341	7.70661	7.54914	3.47219	10.4433	3.4081	7.48397	6.75864	4.47055	9.87742
C01G6.1	CHROMOSOME_II:9258852-9261934	220.336	282.828	3877.07	3474.14	3978.36	3265.34	3658.74	2373.33	1638.72	2415.29	3677.05	3407.54	4054.83
C01G6.2	CHROMOSOME_II:9267275-9268243	3.45	4.5674	3.4967	2.12086	0.136594	0.564946	2.57508	1.71628	4.03599	3.77759	2.27605	3.12254	2.45098
C01G6.3	CHROMOSOME_II:9269831-9271475	1545.82	1659.49	611.839	360.343	512.887	515.332	988.587	749.484	769.675	791.051	512.718	842.349	877.843
C01G6.4	CHROMOSOME_II:9271201-9272984	157.53	169.853	126.112	130.121	126.178	135.339	157.072	81.2571	83.7882	74.0111	108.945	134.105	152.786
C01G6.5	CHROMOSOME_II:9274848-9280038	149.441	121.153	69.6801	47.9623	82.2216	95.1607	63.758	84.7943	67.3307	65.503	78.1455	95.6836	117.711
C01G6.6	CHROMOSOME_II:9285633-9289076	30.9108	27.3739	56.8844	36.4426	34.0986	48.3874	36.6783	41.0726	25.4899	32.79	28.5228	47.0557	32.6554
C01G6.7	CHROMOSOME_II:9291956-9293981	2.66533	2.59344	21.6757	17.5058	36.1848	36.1471	16.0177	24.3292	24.2375	26.9922	40.568	40.9958	28.1872
C01G6.8	CHROMOSOME_II:9295855-9310242	133.775	123.222	125.663	98.5634	152.164	155.707	128.613	141.267	107.553	140.36	126.784	139.032	183.504
C01G6.9	CHROMOSOME_II:9293976-9295693	0.142448	0.339191	16.8271	19.8003	37.1443	31.0707	9.50713	29.5709	21.835	23.8759	32.0186	22.0627	28.9566
C01G8.1	CHROMOSOME_I:5272848-5274325	52.6707	38.2224	30.8099	9.47155	11.1451	8.45545	13.0985	13.2513	22.4756	13.9704	7.96684	21.6712	30.885
C01G8.2	CHROMOSOME_I:5274698-5278711	14.5856	11.9629	9.86586	7.99329	10.7118	10.6657	10.1504	11.7148	10.8331	14.2793	10.5063	13.442	15.3563
C01G8.3	CHROMOSOME_I:5278806-5281519	47.8632	40.6264	18.1527	10.9759	13.2545	13.8419	23.6934	18.2422	23.8866	25.4107	15.46	23.6715	34.8422
C01G8.4	CHROMOSOME_I:5282085-5283944	8.05505	8.04766	7.28774	6.40614	8.66436	8.19094	7.27813	11.0641	11.5439	9.97359	7.04676	5.42325	12.5856
C01G8.5	CHROMOSOME_I:5284059-5291608	130.9	114.453	134.388	116.022	181.616	177.252	144.989	160.63	160.718	140.793	160.018	159.118	203.359
C01G8.6	CHROMOSOME_I:5298757-5300334	9.85224	10.841	4.25692	3.00416	2.8238	4.15257	5.99945	4.57132	4.61485	4.65164	1.82982	2.86898	4.16612
C01G8.9	CHROMOSOME_I:5300953-5310917	134.978	133.628	161.824	132.053	157.195	167.011	201.877	179.184	117.748	152.326	135.166	133.884	187.492
C01H6.1	CHROMOSOME_I:7202180-7203506	0	0	1.5814	1.94117	2.82402	5.29249	0.178254	1.17068	2.38335	1.49757	3.12482	2.52174	0.475057
C01H6.2	CHROMOSOME_I:7204542-7207715	0.371585	0.474	4.26754	3.87378	7.75691	6.96521	3.80245	5.81052	4.74566	4.6756	7.65309	5.83298	4.76164
C01H6.3	CHROMOSOME_I:7208024-7209864	0.343874	0.116974	1.1821	1.19496	1.51125	1.56261	0.904452	1.11346	1.03038	2.31459	1.74873	1.67937	0.903905
C01H6.4	CHROMOSOME_I:7210540-7212697	0.104222	0	2.27991	2.30473	3.61336	2.52586	0.993693	2.05822	1.6207	2.80048	5.19407	3.19934	1.4611
C01H6.5	CHROMOSOME_I:7214742-7221804	25.3552	21.5473	36.3738	24.1295	37.6375	40.4685	45.2678	26.7372	16.873	28.2689	40.9678	44.9116	51.5539
C01H6.6	CHROMOSOME_I:7222048-7224133	1.7994	0.843537	1.34968	1.01296	2.53073	1.63542	1.73938	3.29576	1.03328	1.3247	2.41593	2.10915	3.40572
C01H6.7	CHROMOSOME_I:7224653-7227763	160.944	173.244	77.6803	48.7008	91.8554	83.2232	128.498	153.319	140.25	145.532	69.7897	119.28	137.834
C01H6.8	CHROMOSOME_I:7227861-7229433	0.565926	0.685355	15.3911	17.6584	31.2082	18.3904	9.72581	27.1143	15.5866	27.6285	26.2734	19.3667	20.0042
C01H6.9	CHROMOSOME_I:7229415-7233118	38.7503	36.5347	16.0371	7.67104	16.1057	14.8911	23.4654	28.5464	18.7265	18.3602	12.2486	26.2003	33.0772
C02A12.1	CHROMOSOME_V:3467449-3468498	0	0	0.325254	0.657588	0.762336	1.051	0.171091	0.938543	0.938007	0.810414	1.05856	0.726124	0.683951
C02A12.10	CHROMOSOME_V:3483087-3484778	0	0	0	0	0.092494	0	0	0	0	0	0	0	0
C02A12.2	CHROMOSOME_V:3469441-3470879	0	0	0	0	0	0	0	0	0	0	0	0	0
C02A12.3	CHROMOSOME_V:3478027-3480443	0	0	0	0	0	0	0	0	0	0	0	0	0
C02A12.4	CHROMOSOME_V:3481415-3482599	0.354123	0.144547	0.265591	0.939722	1.76361	3.43298	0.209564	0.229597	0.254946	0.220266	1.29662	3.55343	0.558501
C02A12.5	CHROMOSOME_V:3485545-3486954	0	0	0	0	0	0	0	0	0	0	0.161389	0	0
C02A12.6	CHROMOSOME_V:3489224-3490532	0	0	0	0	0	0	0	0.0704197	0	0	0	0	0
C02A12.8	CHROMOSOME_V:3471866-3475118	0	0.0241267	0	0.0448128	0	0	0	0	0	0	0.0721379	0	0
C02A12.9	CHROMOSOME_V:3476401-3477593	0	0	0	0	0	0	0	0	0	0	0	0	0
C02B10.1	CHROMOSOME_IV:5086324-5088870	39.1971	27.6488	14.7904	9.74377	10.4554	13.1377	20.6537	13.4622	20.5779	13.616	14.6567	24.2533	18.6657
C02B10.2	CHROMOSOME_IV:5090281-5091101	144.769	127.163	61.9151	53.2006	68.9947	54.7551	77.3936	59.6171	90.5334	48.9881	67.3456	58.5635	67.1539
C02B10.3	CHROMOSOME_IV:5092799-5103273	8.24895	9.68901	154.006	132.647	173.485	175.357	113.785	218.622	149.93	251.936	148.392	164.063	185.022
C02B10.4	CHROMOSOME_IV:5091575-5092800	771.763	760.008	284.043	195.87	238.214	256.946	596.607	436.149	556.684	404.167	187.65	308.91	409.383
C02B10.5	CHROMOSOME_IV:5083294-5086879	85.8582	90.653	71.0279	50.5306	75.0065	72.0508	117.498	62.6998	50.4233	56.7785	63.3252	77.4896	84.2748
C02B10.6	CHROMOSOME_IV:5070922-5072221	0.416586	0.0708538	0.0867908	0.0438677	0.0678073	0	0	0.0748658	0	0	0.0706164	0.387517	0.0608352
C02B4.1	CHROMOSOME_X:12678759-12689207	0.209903	0.142803	7.59045	9.87076	11.6261	12.6875	2.99703	12.5432	8.76895	12.06	14.7612	10.1255	8.99879
C02B4.2	CHROMOSOME_X:12663723-12667782	16.7395	17.2785	19.0244	18.6855	25.3192	27.0524	20.3303	24.5074	29.8559	24.5051	40.9193	33.629	30.2876
C02B4.3	CHROMOSOME_X:12658404-12660991	0	0	0	0	0	0	0	0	0	0	0	0	0.3385
C02B4.4	CHROMOSOME_X:12662402-12663553	7.2945	5.18824	14.9209	31.8426	33.6768	32.8124	9.37491	19.6066	24.1919	18.1144	39.1187	13.8794	8.71557
C02B8.1	CHROMOSOME_X:8147660-8148539	0.448847	0.449306	0.962007	0.388994	0.450955	1.67694	1.27581	1.79695	0.740862	1.28059	0.913878	1.71815	2.13593
C02B8.2	CHROMOSOME_X:8144383-8144978	4.36886	5.41866	1.63836	0.509598	0.295386	1.42532	1.19328	1.82597	1.45994	0.840903	0	0.844064	2.65014
C02B8.3	CHROMOSOME_X:8139472-8140184	1.63813	1.56722	0.767892	2.13469	2.39973	5.27276	1.31276	1.88603	1.848	1.59662	2.49914	2.57145	1.34562
C02B8.4	CHROMOSOME_X:8116586-8120057	0.274472	0	10.0356	13.5265	19.0988	15.7984	13.6712	12.5301	8.94499	8.15759	10.4685	13.7874	16.9547
C02B8.5	CHROMOSOME_X:8120360-8125707	0	0.0295546	0	0.274472	0.29698	0.0877354	0.0856944	0.0623614	0.415504	0.0897464	0.176733	0	0
C02B8.6	CHROMOSOME_X:8133099-8136279	14.8639	16.7116	13.3201	12.5457	16.0906	15.9893	22.0612	25.0634	15.5533	20.2449	17.0618	19.7051	23.2476
C02B8.7	CHROMOSOME_X:8137671-8137830	0	0	0	0	0	0	0	0	0	0	0	0	0
C02C2.1	CHROMOSOME_III:7873714-7877041	0.248168	0.32923	0.604924	1.6934	2.43577	3.60867	0.293726	1.01495	0.533876	1.15314	2.65025	1.97378	0.848031
C02C2.3	CHROMOSOME_III:7866442-7868661	0.231354	0.0393492	4.48259	5.84694	12.9918	12.8493	2.5481	7.22955	5.53672	8.1321	9.88278	6.13351	6.48678
C02C2.4	CHROMOSOME_III:7862512-7865222	0.0849558	0.0288989	0.106197	0.16103	0.207423	0.171578	0	0.274386	0	0.263252	0.259219	0.118542	0.37219
C02C2.5	CHROMOSOME_III:7877146-7878774	0.207747	0.212004	2.82413	4.33151	5.40191	8.33892	1.02452	3.41783	3.73319	2.90285	6.81423	4.56555	3.54952
C02C6.1	CHROMOSOME_X:15568847-15573627	19.9554	19.9432	55.0202	55.8702	67.0091	88.9164	47.9944	42.7256	49.4377	44.6052	73.6461	58.1528	56.0951
C02C6.2	CHROMOSOME_X:15537593-15546646	4.30482	6.44317	16.3742	15.1523	22.1065	28.4129	24.3633	15.5476	16.3197	15.4664	26.4135	28.0902	18.7847
C02C6.3	CHROMOSOME_X:15546638-15552165	6.24646	6.73668	56.0763	56.3599	105.871	97.2197	48.6783	53.8435	48.9277	65.7549	102.235	65.0459	65.4141
C02D4.1	CHROMOSOME_X:15284137-15286158	0.0631391	0	1.77584	4.1887	3.97724	9.94631	0.498202	3.34093	5.90575	4.51368	8.47666	3.1716	3.98321
C02D4.2	CHROMOSOME_X:15286509-15302894	0.0422606	0	2.70542	5.38943	3.25723	3.50825	0.965706	2.99437	2.71163	3.3854	4.48452	0.981818	2.14979
C02D5.1	CHROMOSOME_III:8561104-8562892	0	0.0917009	10.5306	14.9886	20.0089	26.4055	2.70321	18.456	28.7252	23.4236	26.7327	18.8076	15.5894
C02D5.2	CHROMOSOME_III:8557254-8559114	3.42037	3.25468	24.2853	20.0553	37.9526	35.7256	25.0472	29.5118	21.2375	30.904	35.28	33.2394	35.6553
C02D5.3	CHROMOSOME_III:8554691-8555741	0.190201	0.258799	0	0.120173	0.185754	0	0.125066	0.205398	0	0.197064	0	0.265394	0.833269
C02D5.4	CHROMOSOME_III:8552472-8553757	54.9937	45.3607	33.5967	24.2961	52.2944	54.0718	40.0352	59.1186	51.3458	60.863	50.4657	59.4261	53.6198
C02E11.1	CHROMOSOME_V:1042692-1048583	144.318	143.957	109.512	72.6033	98.5058	100.889	130.901	146.48	120.824	129.972	92.4926	129.305	148.931
C02E7.1	CHROMOSOME_V:4934723-4939071	0.0311696	0.0318084	0.0292223	0	0	0	0.0153715	0	0	0	0	0.065238	0
C02E7.10	CHROMOSOME_V:4930802-4933013	0	0	0	0	0	0	0.0553547	0	0	0	0	0	0
C02E7.13	CHROMOSOME_V:4943101-4944305	0	0	0.101874	0	0	0	0.160763	0	0	0	0	0	0
C02E7.2	CHROMOSOME_V:4926656-4928181	0	0	0	0.171498	0	0.137049	0	0.0975521	0	0.280781	0.138036	0	0.356747
C02E7.3	CHROMOSOME_V:4924903-4926210	0	0	0	0.109177	0	0.348988	0	0	0.207115	0	0.17575	0.241113	0.151406
C02E7.4	CHROMOSOME_V:4923277-4924580	0	0	0.328954	0.443379	0.34267	0.354317	0.115358	0.504995	0.630883	0.363378	1.0706	0	0
C02E7.5	CHROMOSOME_V:4921087-4922602	0	0	0.195429	0.0987784	0.305369	0.315747	0.1542	0.674656	0.749189	0.16182	0.477028	0.436293	0.547939
C02E7.6	CHROMOSOME_V:4919192-4919567	4.31701	1.2015	3768.4	7456.29	3984.75	5577.2	988.616	4280.28	5447.73	3853	6724.99	2405.09	3119.57
C02E7.7	CHROMOSOME_V:4918139-4918571	0.913481	0	967.747	4176.71	1851.37	3430.09	171.637	1543.75	2854.5	1711.23	2848.55	709.322	1327.84
C02E7.8	CHROMOSOME_V:4920327-4920776	0	0	0	0	0	0	0	0	0	0	0	0	0
C02E7.9	CHROMOSOME_V:4928263-4929928	0	0	0	0	0	0	0	0	0	0	0	0	0
C02F12.1	CHROMOSOME_X:3681154-3684219	1.33782	0.585098	19.1682	18.4121	37.8175	24.6495	10.6503	19.4077	17.4003	14.4342	29.8329	23.0112	15.4609
C02F12.10	CHROMOSOME_X:3672263-3673905	0.235326	0.240149	0.882496	1.18947	1.03421	0.475269	0.386844	0.848216	1.13031	0.976557	1.91475	0.32836	1.03096
C02F12.3	CHROMOSOME_X:3668086-3668929	0.225897	0.115261	4.02247	11.0979	18.4774	23.589	2.23013	3.84094	18.4355	4.40396	21.3209	10.8747	8.67207
C02F12.4	CHROMOSOME_X:3674029-3678546	60.8226	56.2734	31.8605	22.1805	44.1476	39.4739	57.8447	49.7524	45.1514	45.3221	33.9584	44.3831	46.8317
C02F12.5	CHROMOSOME_X:3670359-3672045	0	0	0.384803	0.972477	0.75159	4.04111	0.202415	0.889545	0.740862	0	0.939273	1.71813	0
C02F12.7	CHROMOSOME_X:3684210-3689194	2.67175	2.18926	59.9183	56.1549	103.034	100.715	53.236	96.5342	53.3638	64.7587	90.155	93.273	77.183
C02F12.8	CHROMOSOME_X:3690153-3693225	23.5694	17.9006	9.7736	7.30261	11.9186	10.0924	12.1823	11.7787	12.0237	10.1074	10.3033	13.2814	16.68
C02F12.9	CHROMOSOME_X:3696889-3700794	0.0769965	0	0.433116	0.43783	0.676764	0	0.379715	0.332991	0	0.23961	0.469868	0	0.404784
C02F4.1	CHROMOSOME_IV:10484089-10492932	21.3814	18.1902	11.1199	6.85263	14.7333	13.9508	13.7007	20.2292	10.9017	11.9616	11.0823	16.2924	21.4758
C02F4.2	CHROMOSOME_IV:10492865-10501579	5.44192	4.53759	71.9602	71.027	100.56	132.921	45.8973	54.3777	67.7442	54.4528	114.781	76.7659	64.8797
C02F4.4	CHROMOSOME_IV:10513869-10515263	0.132657	0.0676878	17.5361	20.367	32.5507	31.3462	3.53273	20.6342	23.6298	23.9213	25.0956	14.1602	13.425
C02F4.5	CHROMOSOME_IV:10523414-10524125	0	0	0	0	0	0	0	0	0	0	0	0	0
C02F5.1	CHROMOSOME_III:8250564-8254251	140.988	135.119	57.0836	30.1695	58.8482	51.6038	100.708	103.967	63.9445	62.3407	47.3853	87.5574	108.268
C02F5.10	CHROMOSOME_III:8248613-8249410	2.05394	1.9348	2.96248	2.39578	2.31451	1.43591	1.71416	3.61301	3.439	1.98081	0.482079	1.98411	2.07652
C02F5.11	CHROMOSOME_III:8236845-8237822	0.234526	0.398887	0.586329	0.59271	1.83234	0.947305	0.848162	1.18343	0.844827	0.486606	2.14678	6.54485	2.67139
C02F5.12	CHROMOSOME_III:8240806-8242932	23.2435	20.8372	25.3476	20.3458	31.3308	22.4936	34.4281	30.3992	22.6017	28.7902	33.2443	38.1759	35.9586
C02F5.13	CHROMOSOME_III:8247276-8248745	45.5806	40.2865	26.6538	15.8149	17.5418	12.17	14.9349	26.2283	25.8793	32.4568	20.7436	24.2544	35.5377
C02F5.14	CHROMOSOME_III:8234451-8235458	0.161323	0.329258	8.16718	7.33873	20.324	11.7291	2.70496	3.51447	4.68328	2.5289	8.86018	6.07769	5.93673
C02F5.2	CHROMOSOME_III:8249565-8250122	0.214859	0	0.40287	0.407255	1.57376	1.3018	0.847675	0.470306	1.56679	1.35367	1.31116	0	1.69433
C02F5.3	CHROMOSOME_III:8245817-8247188	104.117	107.173	75.0963	43.1846	74.8674	66.2424	74.1971	104.712	102.466	108.711	75.8918	106.139	91.1393
C02F5.4	CHROMOSOME_III:8244371-8245723	48.7235	50.7974	22.8633	17.2152	32.3435	26.4502	43.8996	33.72	31.0139	26.1721	22.5067	39.2791	45.7691
C02F5.5	CHROMOSOME_III:8236074-8236835	0.849338	0	0.398138	0	0.311054	0.321626	0	0.230164	0	1.65619	0.32394	0.444417	0
C02F5.6	CHROMOSOME_III:8232577-8234463	50.7374	42.3099	14.1931	8.13398	12.4341	13.142	14.5254	18.1864	22.3432	12.7198	11.0717	15.0068	21.8475
C02F5.7	CHROMOSOME_III:8229653-8233595	4.13268	4.46322	17.6456	15.3792	25.1559	23.1095	13.8956	15.2296	12.3234	17.4738	27.2529	20.3365	16.6036
C02F5.8	CHROMOSOME_III:8237923-8239352	0.196714	0	1.72129	0.870012	1.72902	3.1783	1.42283	1.98307	0.707834	0.407701	2.60095	3.56827	2.24069
C02F5.9	CHROMOSOME_III:8243047-8244023	361.702	322.828	99.0083	65.954	95.3024	89.6205	158.512	88.5637	132.539	99.9855	98.321	126.953	152.677
C02G6.1	CHROMOSOME_V:5876352-5879925	0.208268	0.14077	0.63902	0.292227	0.475476	0.368727	0.31213	0.366514	0.0872152	0.200938	0.56945	0.475533	0.490574
C02G6.2	CHROMOSOME_V:5872066-5874897	0.027272	0.0208732	0.0383522	0	0.0299636	0	0.0302612	0.0660158	0.0366545	0	0.0312049	0	0.0537652
C02G6.3	CHROMOSOME_V:5881093-5882433	0	0	8.41121	15.9426	16.7024	15.2882	5.5306	6.52987	7.47786	6.46068	15.9686	5.47687	6.38706
C02H6.1	CHROMOSOME_V:7388370-7389852	0	0.05856	0.107598	0	0.0840632	0	0	0	0	0	0	0	0
C02H6.2	CHROMOSOME_V:7390507-7392068	0.0998126	0.101858	0.655036	3.21623	3.94788	3.32612	1.32903	2.53	3.94527	1.85924	7.61377	5.64052	4.06668
C02H7.1	CHROMOSOME_X:763767-766732	3.4927	3.37501	10.2001	7.79197	15.078	12.9218	9.26771	16.1425	8.20521	12.0706	11.5058	17.9844	13.5682
C02H7.2	CHROMOSOME_X:731158-735671	0	0.0762049	0.280036	0.353855	0.820444	1.01799	0.0736528	0.281598	0.134018	0.347364	0.341773	0.312589	0.490722
C02H7.3	CHROMOSOME_X:751209-759731	0.578709	0.350751	17.001	16.0684	28.4295	28.5689	12.5088	18.1998	11.7126	17.9636	24.9451	16.9537	16.5328
C03A3.1	CHROMOSOME_X:11257295-11260160	1.44471	1.16777	35.2379	32.1227	56.9576	48.6743	35.5536	46.1549	26.8911	47.1717	54.3631	40.8594	36.9106
C03A3.2	CHROMOSOME_X:11262780-11266258	37.6703	31.8589	26.3296	21.8528	39.3955	48.5046	31.3541	24.5678	28.3348	19.9857	44.3477	27.9804	37.6602
C03A3.3	CHROMOSOME_X:11267325-11268966	0.0688112	0	1.80635	0.782572	1.10884	2.50151	0	0.966479	0	0.427967	0.839834	0.864134	0.361754
C03A7.10	CHROMOSOME_V:5170897-5172917	0.062115	0	0	0	0	0.188173	0	0.402422	0.22344	0	0.189527	0	0
C03A7.11	CHROMOSOME_V:5175009-5177240	2.84689	3.71225	6.52429	6.05568	12.2798	13.4158	10.3582	12.6038	7.03596	13.8246	18.2416	14.6977	13.6363
C03A7.12	CHROMOSOME_V:5178319-5181440	0.0641079	0.196265	1.44246	1.09362	2.91131	2.33053	1.07492	1.93856	0.691947	2.3913	1.36925	1.61014	2.69622
C03A7.13	CHROMOSOME_V:5191113-5192515	0	0	0.689492	0.232332	0.897804	1.02115	0.785826	0.959482	0	0.761834	0.747998	1.02619	1.12768
C03A7.14	CHROMOSOME_V:5192976-5194592	0.217457	0.0532594	27.6613	99.8191	163.399	307.752	11.0615	44.5126	81.8447	69.0218	131.694	55.1872	40.2793
C03A7.2	CHROMOSOME_V:5181895-5183701	0.0883938	0.18041	0.331485	0.0558488	0.0863268	0	0.116245	0	0.635761	0.732376	0	0	0.774503
C03A7.3	CHROMOSOME_V:5165709-5167225	0	0	0	0	0	0	0	0.105927	0	0	0	0	0
C03A7.4	CHROMOSOME_V:5158607-5159882	0.0785502	0	3.18417	10.9823	16.4385	33.3033	1.1732	2.65357	4.05734	4.48048	10.7511	4.05534	2.78251
C03A7.5	CHROMOSOME_V:5154041-5155501	0	0	0	0	0	0.204479	0	0	0	0	0	0	0
C03A7.6	CHROMOSOME_V:5156637-5157745	0	0	0	0	0	0	0	0	0	0	0	0	0
C03A7.7	CHROMOSOME_V:5160586-5161877	0.0331783	0	3.38704	12.5287	17.7349	34.4307	1.56349	2.20178	3.94558	2.83692	13.498	4.79924	4.54472
C03A7.8	CHROMOSOME_V:5163379-5164743	0.0516202	0.0632137	8.00134	29.8162	42.8007	87.3746	3.47572	8.73866	12.8261	11.0602	31.5009	15.3131	13.3427
C03A7.9	CHROMOSOME_V:5168258-5169670	0.0536338	0	0	0	0	0	0	0	0	0	0.163648	0	0
C03B1.1	CHROMOSOME_X:6373611-6375555	0.133234	0.0679822	0.12491	0.126269	0	0	0.328528	0.359799	0	0.41424	0	0.278859	0.700435
C03B1.10	CHROMOSOME_X:6357710-6357919	38.1597	11.6826	7.15513	0	0	0	0	0	0	0	0	0	10.0306
C03B1.12	CHROMOSOME_X:6376400-6377651	1111.66	1142.16	657.045	425.23	524.892	513.678	779.505	498.221	701.785	439.869	476.676	673.708	819.346
C03B1.13	CHROMOSOME_X:6335238-6337787	6.84621	9.25241	3.05311	3.22663	4.60801	5.82965	4.01503	5.90089	4.38329	3.44278	4.74244	4.49238	4.6692
C03B1.14	CHROMOSOME_X:6359371-6360724	0.430934	0.366471	0.538681	0	1.99907	1.52307	0.637557	1.70761	0.775738	1.34043	0.876584	0.901946	0.755166
C03B1.2	CHROMOSOME_X:6367577-6373121	0	0.073409	0.134881	0.272698	0.210758	0.435842	0.0709506	0.155481	0.258987	0.223758	0.438978	0.301119	0.189087
C03B1.3	CHROMOSOME_X:6365976-6366795	0	0	1.17506	0	0	0	0	0	0	0	0	0	0
C03B1.4	CHROMOSOME_X:6364459-6365681	0.164758	0	0.154465	0	0.120679	0.748685	0.081252	0.356439	0.296862	0	0.502715	0	0
C03B1.5	CHROMOSOME_X:6355548-6357745	0	0	2.07752	2.31739	4.36562	5.78717	0.904407	1.60555	1.09719	1.89588	3.26413	1.91919	0.602573
C03B1.6	CHROMOSOME_X:6350150-6351840	0	0	0.145101	0	0	0	0	0	0	0	0	0	0
C03B1.7	CHROMOSOME_X:6342119-6345993	9.66771	11.3144	4.89152	3.70857	6.50518	6.97324	5.42989	10.6783	5.63685	5.52341	6.08696	6.98574	11.1432
C03B1.9	CHROMOSOME_X:6346322-6347077	0	0	0	0	0	0	0.109522	0	0	0	0	0	0
C03B8.2	CHROMOSOME_III:7715425-7716381	3.1784	2.79457	3.48797	4.3757	4.30568	3.75014	8.06992	3.84226	2.53589	6.05117	2.22033	7.91286	4.53793
C03B8.3	CHROMOSOME_III:7712265-7717253	0.309021	0.0788386	0.57943	0.292868	0.226347	0.23404	0.304794	0.751766	0	0	0.942894	0.646783	1.21844
C03B8.4	CHROMOSOME_III:7700068-7709407	77.9249	80.8387	44.7901	28.9796	47.7616	43.9218	90.2146	70.6847	45.7957	53.7117	41.8058	58.5845	68.9731
C03C10.1	CHROMOSOME_III:4083977-4086618	557.79	490.223	351.203	260.621	355.732	332.181	436.154	278.051	293.842	314.67	344.827	479.47	517.335
C03C10.2	CHROMOSOME_III:4091051-4093254	0.0527715	0	0	0.100026	0.0773063	0.159868	0.156149	0.227739	0	0.491621	0	0	0.138715
C03C10.3	CHROMOSOME_III:4093279-4094899	1266.28	1146.15	395.507	180.399	297.04	263.711	448.385	629.43	686.512	700.807	278.358	658.982	668.985
C03C10.4	CHROMOSOME_III:4096874-4098107	188.137	177.668	74.8906	56.7508	73.6008	74.2775	107.071	127.084	137.8	169.413	68.746	106.166	133.333
C03C10.5	CHROMOSOME_III:4090265-4090532	11.676	2.97883	268.191	271.11	239.464	349.296	364.203	902.458	325.653	643.1	307.276	342.132	299.242
C03C10.7	CHROMOSOME_III:4096018-4097114	0.077647	0	0.291183	0	0.113747	0.235226	0.153169	0	0	0.724943	0	0	0
C03C10.9	CHROMOSOME_III:4089777-4089912	28.8928	22.1138	1381.47	1341.75	1111.05	1203.52	1610.11	2036.75	1290.68	1656.74	925.665	1511.82	1784.76
C03C11.1	CHROMOSOME_I:10014720-10015487	0.0988593	0	0.185366	0.562149	0.434464	0.299486	0.0975066	0.74964	1.07031	1.54119	0.904925	0	0.779582
C03C11.2	CHROMOSOME_I:10016767-10018105	10.1419	6.35511	2.89141	1.68627	1.12948	1.25771	3.74386	0.448176	0.85318	0.737127	0.361932	1.24135	3.11801
C03D6.1	CHROMOSOME_I:9668469-9670706	0.22449	0.286364	1.99942	1.9148	3.61748	1.02012	1.99277	0.545112	0.605333	1.22032	1.71243	1.40958	1.32771
C03D6.3	CHROMOSOME_I:9665245-9668655	67.5281	63.5297	32.8913	21.3328	43.5636	39.8015	37.5751	58.0744	41.446	45.7998	39.4414	59.3807	61.9539
C03D6.4	CHROMOSOME_I:9660165-9665135	98.8339	88.1511	39.2584	21.6885	35.7295	36.9599	63.1466	61.6559	46.8176	44.8133	32.7292	49.2638	62.0085
C03D6.5	CHROMOSOME_I:9658264-9660064	75.665	63.3241	21.9885	10.2762	11.1362	10.8898	22.4354	25.5086	20.7682	32.7738	9.88933	27.1346	31.5997
C03D6.6	CHROMOSOME_I:9657048-9657841	38.4458	30.5034	16.0409	7.61935	7.8516	8.74297	10.5728	15.6374	18.9775	10.6092	3.45945	12.0809	17.8817
C03D6.8	CHROMOSOME_I:9669403-9670132	290.694	316.672	236.369	264.812	336.869	267.543	381.221	304.094	345.48	355.645	271.276	293.217	256.63
C03E10.1	CHROMOSOME_V:11291169-11292551	0	0	0	0	0	0	0	0	0	0	0	0	0
C03E10.3	CHROMOSOME_V:11286959-11288208	0.332674	0.282909	0.311889	0.630567	0.24367	0.839841	0.218748	0.179501	0	0.861088	0.169177	0.928381	1.0202
C03E10.4	CHROMOSOME_V:11282551-11286024	46.8096	44.4166	31.2072	17.745	33.1234	45.6102	36.4763	44.9975	38.9735	44.2772	35.5813	40.5641	53.7505
C03E10.5	CHROMOSOME_V:11273129-11278141	0	0.0156756	0	0	0.585063	0	0	0	0	0	0	0	0
C03E10.6	CHROMOSOME_V:11271332-11272451	0	0	0	0	0	0	0.0725401	0	0	0	0	0	0
C03F11.1	CHROMOSOME_X:5390697-5394108	0.341304	0.154799	0.568854	0.359403	0.555537	1.03395	0.187019	0.490334	0.544503	0.588047	1.04139	0.476233	0.498415
C03F11.2	CHROMOSOME_X:5394530-5396896	0	0	2.33721	2.46109	4.9454	8.33892	1.02452	2.91355	5.22646	3.22538	6.65575	2.17407	2.32084
C03F11.3	CHROMOSOME_X:5397643-5400552	0.463084	0.531647	9.11721	9.32614	15.8996	18.4129	8.36421	10.2208	8.9277	10.9421	18.7219	14.1751	9.66201
C03F11.4	CHROMOSOME_X:5401452-5406411	0.309269	0.197247	1.08787	1.53999	2.60049	3.85528	0.534232	2.17765	0.971407	1.43877	2.36911	1.87044	1.93383
C03G5.1	CHROMOSOME_X:8542813-8545974	71.2759	69.0491	112.039	82.647	100.282	104.325	100.442	92.4709	93.1497	92.9359	106.756	110.121	96.8338
C03G5.10	CHROMOSOME_X:8537054-8537460	0	0	1.9162	0.553445	0.784184	0.884549	0.0959968	0.857985	1.42916	0.617378	0.296971	0.814835	0.255837
C03G5.11	CHROMOSOME_X:8537895-8538306	0	0	0	0	0	0.287681	0	0	1.04515	0	0	0	0
C03G5.12	CHROMOSOME_X:8538686-8539037	0	0	0.273216	0	0	0.882844	0	0	0	0	0	0.609949	0.383016
C03G5.13	CHROMOSOME_X:8541092-8541443	0	0	0.273216	0	0.320185	0.882844	0	0	0	0	0	0.609949	0.383016
C03G5.2	CHROMOSOME_X:8541811-8542231	0	0	1.51911	1.53565	0.527484	1.09082	0.0887873	0.495017	1.31929	0.569917	0.274669	2.44933	0.946492
C03G5.7	CHROMOSOME_X:8528196-8531023	0.120031	0.122492	12.8287	33.8997	31.8265	50.1805	6.51141	12.2454	19.9632	15.373	39.5542	16.5809	12.9361
C03G5.8	CHROMOSOME_X:8534616-8535053	0	0	1.6128	0.931631	1.02003	2.48164	0.0807968	0.449505	1.19799	0.517518	0.24995	1.20018	0.215329
C03G5.9	CHROMOSOME_X:8535415-8535766	0	0	0.273216	0	0.320185	0.882844	0	0	0	0	0	0.609949	0.383016
C03G6.10	CHROMOSOME_V:7342169-7343818	0	0.0494262	0.635707	1.28525	2.05759	2.05417	1.1465	1.61927	1.04409	2.40553	2.66007	1.01372	0.63656
C03G6.11	CHROMOSOME_V:7350862-7352218	0	0	0	0	0	0	0	0	0	0	0	0	0
C03G6.12	CHROMOSOME_V:7348192-7350049	0.0795887	0.162439	0.59693	0.754283	1.16591	2.53164	1.0205	1.20078	1.57155	1.35778	1.6999	1.16605	1.46444
C03G6.13	CHROMOSOME_V:7354457-7356766	0	0	0	0	0.124	0	0	0	0	0.131307	1.0331	0.177164	0.11125
C03G6.14	CHROMOSOME_V:7359978-7361755	0	0	0	0.0361791	0.0559229	0	0	0.0205668	0	0.17759	0	0	0
C03G6.15	CHROMOSOME_V:7362297-7364186	0	0.0332885	1.03979	0.401894	1.14686	2.37168	0.707821	1.66874	1.05333	2.07291	1.69203	2.5944	0.943192
C03G6.16	CHROMOSOME_V:7377878-7379466	0	0	0	0	0	0	0	0	0	0	0	0	0
C03G6.17	CHROMOSOME_V:7379735-7381066	0.0547194	0	1.12861	1.45205	4.1683	3.97843	0.539706	1.47616	2.3605	2.88917	4.00707	0.916223	1.43834
C03G6.18	CHROMOSOME_V:7382002-7383291	0.59192	0.525261	1.44767	2.04879	2.33745	4.13211	1.5484	1.66577	1.66482	1.03882	5.73234	3.01643	1.62356
C03G6.19	CHROMOSOME_V:7384213-7386288	2.77037	2.31484	6.55423	9.37447	14.6538	18.1934	7.24379	11.2984	11.2118	11.5894	28.8764	20.0804	9.286
C03G6.2	CHROMOSOME_V:7374371-7375576	0	0	0	0	0	0.198079	0	0	0	0	0	0	0
C03G6.3	CHROMOSOME_V:7369741-7372113	0	0	0.0476651	0.0481839	0.111718	0.0770103	0	0.0273605	0	0	0	0.106411	0
C03G6.5	CHROMOSOME_V:7365224-7365906	0	0	0	0.661801	0.852468	0.705154	0.229583	1.38898	0.420661	0	1.06534	1.46155	0
C03G6.6	CHROMOSOME_V:7357419-7358864	0	0	0.352743	0.118861	0.734903	1.51977	0	0.948004	0	0.389802	0	0.524995	0.164835
C03G6.7	CHROMOSOME_V:7353021-7354236	0	0	0	0.103718	0	0	0	0	0	0	0	0	0
C03G6.8	CHROMOSOME_V:7346671-7348117	0.0489494	0	1.28496	1.4845	1.64927	1.77946	2.65538	2.58688	1.40702	1.9754	2.98712	1.43432	1.28668
C03G6.9	CHROMOSOME_V:7344042-7345216	0	0	0.213595	0.10796	0.250314	0	0	0.18442	0	0.176937	0.347579	0	0.149717
C03H12.1	CHROMOSOME_X:15689389-15696355	21.5892	23.3973	23.4311	15.7375	34.1889	27.0359	38.1191	32.6597	25.0764	31.5193	24.7549	32.9912	33.9001
C03H5.1	CHROMOSOME_II:402659-404235	0	0	1.28515	2.52187	3.9572	4.39701	0.516951	3.47608	6.07965	2.75138	1.84526	0.67504	2.86142
C03H5.2	CHROMOSOME_II:388832-392737	25.9889	22.2616	41.829	37.8602	54.576	50.448	50.4697	33.1495	45.9475	43.319	59.7131	55.6162	61.235
C03H5.3	CHROMOSOME_II:386193-387920	87.87	95.6799	43.6288	28.9328	43.6335	44.3371	46.2942	107.118	101.547	114.019	34.3643	54.5635	73.7856
C03H5.4	CHROMOSOME_II:375249-375835	2.30712	3.36342	0.926988	0.312359	0	0	0.812695	2.51383	1.79457	0	0.502823	0.689828	1.7327
C03H5.5	CHROMOSOME_II:382272-385354	1.12329	0.955262	3.33486	3.31202	6.03365	8.60186	2.76981	5.71211	4.7014	4.73887	6.66443	3.52658	4.51103
C03H5.6	CHROMOSOME_II:392813-399976	0.165449	0.101304	3.66065	6.96193	8.82226	18.7454	1.1423	3.67078	8.19221	5.53919	11.0051	4.84799	3.04428
C03H5.7	CHROMOSOME_II:380572-382344	10.214	15.682	1.9842	1.65696	2.5612	3.34516	6.80695	4.46485	4.13176	3.28416	3.50961	3.65931	5.56321
C04A11.1	CHROMOSOME_X:13660448-13662893	0.196636	0.250832	6.91315	13.1382	11.5942	21.1471	3.73344	7.68795	8.47839	9.61422	15.8995	5.76182	6.20249
C04A11.2	CHROMOSOME_X:13665886-13668742	28.4982	33.6475	24.2945	15.577	26.2623	29.1123	39.1555	33.5131	23.1854	29.1742	20.3231	26.0781	27.0026
C04A11.3	CHROMOSOME_X:13677121-13682008	47.7841	43.8898	41.4984	31.2539	45.2954	45.8742	50.9856	49.3567	36.9928	40.4518	37.9902	51.3065	59.5705
C04A11.4	CHROMOSOME_X:13687902-13695721	10.0646	9.86744	13.1131	11.7286	15.3451	19.7125	14.4705	13.3569	11.4376	14.6345	21.478	20.1106	18.7427
C04A11.5	CHROMOSOME_X:13664516-13665310	0	0	1.24079	4.32681	2.18059	1.71804	0	1.0813	0.600374	3.15222	5.04639	4.1539	0.869468
C04A2.1	CHROMOSOME_II:6848016-6851484	4.95465	3.94174	5.17956	4.2297	5.45639	6.95611	4.7698	5.07456	6.04022	8.16362	7.71886	10.2181	6.34019
C04A2.3	CHROMOSOME_II:6835037-6847865	114.284	103.486	136.379	98.2943	125.859	135.071	128.272	178.566	118.232	150.89	101.984	146.077	189.839
C04A2.7	CHROMOSOME_II:6853420-6858255	342.61	293.303	120.095	73.8157	118.125	128.018	167.936	130.261	114.707	104.082	101.959	137.921	215.24
C04B4.1	CHROMOSOME_X:12280638-12282491	0	0.0662479	0	0	0	0	0.0354132	0.116046	0	0	0	0	0
C04B4.2	CHROMOSOME_X:12283232-12285246	22.1049	18.6616	5.8673	3.75458	3.06999	6.2617	4.44545	4.11067	11.7381	5.69341	3.76654	6.12871	8.82893
C04B4.3	CHROMOSOME_X:12285755-12287185	0	0	0	0	0	0	0	0	0	0	0	0	0
C04B4.4	CHROMOSOME_X:12289910-12293199	0	0	0.208671	0.210942	0.108686	0.22476	0.0365886	0	0.266299	0	0.452755	0	0.0975106
C04B4.5	CHROMOSOME_X:12287590-12288286	0	0	0	0	0	0	0.0921543	0	0	0	0	0	0
C04B4.6	CHROMOSOME_X:12274973-12275609	0	0	0	0	0	0	0	0	0	0	0	0	0
C04C11.1	CHROMOSOME_X:14020716-14022340	0.0692259	0.0706446	1.68743	2.23065	3.95501	4.82344	0.751066	1.72029	3.73762	4.09034	2.32346	2.60802	1.81966
C04C11.2	CHROMOSOME_X:14033724-14037384	32.4586	32.3796	82.5222	80.9364	120.817	124.728	97.4768	128.664	92.1809	127.2	86.6103	95.9796	112.736
C04C3.1	CHROMOSOME_IV:3428896-3430330	0.547845	1.06224	0.308171	0.415367	0.882807	0.663864	1.83719	0.709405	0.393888	0.34031	0.50148	0.917314	0.288012
C04C3.2	CHROMOSOME_IV:3415679-3419231	0.451628	0.354526	0.195421	0.197548	0.305355	0.210489	0.274123	0.299377	0.623346	0	0.106001	0.290849	0
C04C3.3	CHROMOSOME_IV:3399666-3403904	79.9004	80.5873	58.2863	53.0086	57.309	69.5745	57.2165	46.2558	67.1721	48.9395	70.4416	65.5441	67.4927
C04C3.4	CHROMOSOME_IV:3394362-3394642	1.20086	3.26792	6.75501	4.55236	2.34556	0	12.2391	0	3.35611	0	7.3282	30.9987	5.26096
C04C3.5	CHROMOSOME_IV:3396577-3399120	0.698248	2.11236	12.6793	7.25454	10.0282	8.24385	6.70995	18.6463	17.6431	23.4892	11.5463	14.2387	9.05593
C04C3.6	CHROMOSOME_IV:3419809-3422604	0.0553121	0	0.207426	0	0	0.502691	0	0.119378	0.596548	0	0.337539	0	0
C04C3.7	CHROMOSOME_IV:3432771-3433484	0	0	0	0	0	0	0	0	0	0	0	0	0
C04C3.9	CHROMOSOME_IV:3428084-3428531	0	0	0	0	0	0	0	0	0	0	3.5129	0	0
C04D8.1	CHROMOSOME_III:8494940-8518803	46.9959	38.8727	49.5945	40.4381	63.1129	78.0151	49.4833	62.0495	48.6536	52.0167	53.1464	49.0666	68.4563
C04E12.10	CHROMOSOME_V:3377532-3381921	0	0	0	0	0.0366916	0	0	0.0539141	0	0	0	0.104846	0
C04E12.11	CHROMOSOME_V:3386487-3388153	0	0	0	0	0.173571	0.35894	0.467453	0.192859	0	0	0.180761	0	0.311447
C04E12.12	CHROMOSOME_V:3389326-3390949	0.525649	0.450593	0.709643	0.199268	0.277213	0.127393	0.331813	0.113317	0	0	0.256619	0.616104	0.110537
C04E12.2	CHROMOSOME_V:3368069-3369874	0	0	0	0	0.13576	0	0.00090302	0	0	0	0	0.775889	0.243615
C04E12.4	CHROMOSOME_V:3362780-3368318	0	0	0.0255724	0	0.0799161	0	0.0400458	0.146814	0	0	0.0832268	0	0.0716989
C04E12.5	CHROMOSOME_V:3358595-3361090	0	0	0.167537	0	0.0523568	0	0.15863	0	0	0.22164	0.327155	0.149609	0
C04E12.6	CHROMOSOME_V:3354665-3355510	0	0	0	0	0	0	0	0	0	0	0	0	0
C04E12.7	CHROMOSOME_V:3355976-3357190	1.49894	1.01978	1.09301	0.947063	0.853939	0.252275	1.31416	0.0900856	0.300113	0.777871	0.50818	1.04577	0.656686
C04E12.8	CHROMOSOME_V:3370938-3372770	0	0	0	0	0	0	0	0	0	0	0	0	0
C04E12.9	CHROMOSOME_V:3374358-3377073	0	0	0	0	0	0	0	0	0	0	0	0	0.137922
C04E6.10	CHROMOSOME_V:5904899-5906335	0	0	0	0	0.296297	0.153183	0.0498733	0.0545438	0	0	0.154286	0	0
C04E6.11	CHROMOSOME_V:5914077-5917831	5.24319	4.03282	5.4553	3.00801	6.35894	5.32604	5.40163	7.67963	3.62302	4.76753	5.79161	7.03378	9.77432
C04E6.13	CHROMOSOME_V:5912739-5913740	0.350125	1.4292	1.9695	5.30917	6.66778	14.8494	0.345334	4.26524	10.3341	5.58022	7.47817	5.8625	4.60168
C04E6.2	CHROMOSOME_V:5922527-5924280	0	0	0.118226	0	0	0	0.12438	0.136176	0	0	0	0	0
C04E6.3	CHROMOSOME_V:5920103-5920378	0	0	0	0	0	0	0	0	0	0	0	0	0
C04E6.4	CHROMOSOME_V:5907390-5909603	0	0	0	0	0	0	0	0	0	0	0	0	0
C04E6.5	CHROMOSOME_V:5902115-5904829	0.0641473	0	0	0	0	0	0	0	0	0.099419	0	0	0
C04E6.6	CHROMOSOME_V:5895370-5898585	0	0	0.0500458	0	0.0390994	0	0.0263253	0.0574606	0	0	0	0	0.140317
C04E6.7	CHROMOSOME_V:5893299-5895196	0.20658	0.105406	1.27067	3.35903	1.86142	4.10045	0.905563	1.67194	1.2209	2.3367	1.55172	4.60793	1.22187
C04E6.8	CHROMOSOME_V:5882647-5883820	0	0	0	0	0.270509	0.559408	0	0.201559	0	0	0.563433	0	0.48539
C04E6.9	CHROMOSOME_V:5898510-5900023	0	0	0	0	0	0	0	0.0598337	0	0.344435	0	0	0.145744
C04E7.1	CHROMOSOME_X:358091-360198	0.147802	0.226247	0	0.140077	0	0	0.14578	0.159758	0	0.229915	0	0	0
C04E7.2	CHROMOSOME_X:353619-357934	47.8702	46.903	24.8604	17.8577	31.9238	32.792	42.9315	39.8839	35.2288	38.3345	32.2416	37.7595	49.6801
C04E7.3	CHROMOSOME_X:344126-346289	2.75159	2.84265	4.20393	3.15507	8.21103	6.27754	3.45107	9.11087	3.90068	5.68703	5.07889	8.53199	9.46516
C04E7.4	CHROMOSOME_X:334309-341232	1.27445	1.56475	2.24031	2.52891	3.85065	3.67989	1.76768	3.92034	1.57009	3.02134	4.01017	2.50073	4.03049
C04E7.5	CHROMOSOME_X:360778-362966	0	0.152827	0	0	0	0	0.147709	0.162959	1.08577	0	0	0	0
C04F1.1	CHROMOSOME_I:5726375-5729310	0	0	0	0	0	0	0	0.0641083	0	0	0	0	0
C04F1.3	CHROMOSOME_I:5716678-5725359	9.23229	10.0712	48.7244	44.0501	53.7486	61.3621	45.6084	45.2007	33.2882	45.0535	39.3406	42.6443	59.2053
C04F12.1	CHROMOSOME_I:9673657-9678544	22.86	18.5682	10.3939	4.20886	6.92697	9.09818	9.84766	8.43521	9.4434	8.25776	6.28782	8.02449	8.60822
C04F12.10	CHROMOSOME_I:9711057-9712757	16.3124	18.2186	36.0715	32.2468	66.459	52.5988	43.3802	44.6088	35.1742	49.6999	55.9679	52.2407	63.6497
C04F12.12	CHROMOSOME_I:9694612-9695203	0.161891	0	0.45533	0.306857	0	0.490438	0	0	0	0	0	0	0
C04F12.3	CHROMOSOME_I:9685472-9688639	0.214021	0.0273008	17.6571	13.9448	26.6887	22.3684	14.064	21.1949	13.3351	20.1415	24.0802	28.3326	20.4636
C04F12.4	CHROMOSOME_I:9689175-9690118	596.707	795.902	2390.36	3055.03	1952.32	1817.81	638.867	2092.31	2320.54	2997.81	1895.19	1865.31	1449.24
C04F12.5	CHROMOSOME_I:9690088-9690548	88.876	85.7584	57.7488	37.9453	38.9945	43.3189	48.6036	30.5916	57.7778	49.2253	39.6031	55.2528	60.1395
C04F12.6	CHROMOSOME_I:9692650-9693772	0.0630026	0.115729	0.0945064	0	0.0922942	0.0763448	0.0372844	0.0408657	0	0	0	0	0
C04F12.7	CHROMOSOME_I:9695698-9696753	0.745946	0.095154	0.262253	0.883694	0.47808	0.42371	0.413853	0.151437	0.5045	0.581167	1.42253	0.195158	0.122549
C04F12.8	CHROMOSOME_I:9697584-9699546	1.71908	1.83058	6.02626	11.0503	14.891	26.2655	6.92967	11.4729	8.61318	8.83687	11.6308	6.8832	11.7881
C04F12.9	CHROMOSOME_I:9710078-9710758	0.884142	2.10527	6.07862	7.54132	5.1808	3.57125	14.3888	1.2825	2.13628	2.76854	4.04657	5.55153	1.54936
C04F2.1	CHROMOSOME_V:7497720-7499036	0.0533846	0	0	0	0	0	0	0.0575992	0	0	0.162889	0	0
C04F2.4	CHROMOSOME_V:7501716-7504352	0.0312238	0	0.058546	0	0	0	0	0	0	0	0	0	0
C04F5.1	CHROMOSOME_V:5119954-5126901	18.0725	14.6508	9.71206	4.41088	7.8627	9.89238	12.4203	8.11522	9.07901	6.56575	8.41749	10.2125	15.1444
C04F5.2	CHROMOSOME_V:5093699-5096262	0	0	0.256558	0	5.27e-08	0	0	2.63e-08	0	0	0	0.572761	0
C04F5.3	CHROMOSOME_V:5094768-5098892	0	0	1.31209	1.50723	1.44445	2.98709	0.313721	1.67843	2.51049	1.08451	2.42628	1.19831	1.08691
C04F5.4	CHROMOSOME_V:5100064-5102102	0	0	0	0	0	0	0.0539707	0	0	0.169951	0	0	0.143834
C04F5.5	CHROMOSOME_V:5103026-5105019	0.0557144	0	0	0	0	0.337565	0	0	0	0	0	0	0
C04F5.6	CHROMOSOME_V:5105748-5107901	0	0.0508186	0	0	0	0	0.0491168	0.0537128	0	0	0	0	0
C04F5.7	CHROMOSOME_V:5107999-5110774	0.755943	0.617147	0.963851	0.515828	0.885919	0.091603	4.26483	0.260471	0.867739	0.374853	1.93751	1.0126	0.63586
C04F5.8	CHROMOSOME_V:5111481-5113741	85.3326	89.4269	43.6541	25.7067	36.8138	35.7191	47.6689	62.3973	54.4695	62.4222	34.4701	51.4541	75.7172
C04F5.9	CHROMOSOME_V:5114729-5119194	10.2	10.8793	7.14324	5.1828	8.1462	8.56268	11.0908	9.46163	11.7928	9.14118	9.28049	9.77406	16.6361
C04F6.1	CHROMOSOME_X:3403456-3408591	1.25038	1.03822	0.119995	12.4816	10.6033	0.149132	3.15763	0.102296	0.146894	1.63464	0.0350477	0.103034	0.0172532
C04F6.2	CHROMOSOME_X:3397137-3397454	0	0.676647	21.1355	20.1087	35.9392	36.1564	9.1558	18.0673	22.5711	15.1674	26.3008	13.8778	8.71455
C04F6.3	CHROMOSOME_X:3397593-3400007	959.475	1196.32	919.707	430.108	439.717	372.298	1914.3	668.697	545.079	580.455	485.357	958.624	974.871
C04F6.4	CHROMOSOME_X:3408649-3411669	29.3119	24.6318	36.9199	27.6261	45.1496	37.0669	34.8355	27.7235	24.1246	28.4234	48.7848	45.408	40.2031
C04F6.5	CHROMOSOME_X:3412869-3414693	7.06726	6.22111	47.1387	37.8351	64.5679	53.7696	54.0618	63.7988	41.6938	66.013	45.5967	57.5864	58.4252
C04F6.7	CHROMOSOME_X:3416874-3419200	0	0	0.066191	0	0.103427	0	0	0.0760553	0	0.328361	0.107711	0	0.0927919
C04G2.1	CHROMOSOME_IV:10088345-10089868	0	0	0.176627	0.357099	0.137994	1.99758	0.0929098	0.408004	1.01943	0.293586	2.01195	0.394317	0
C04G2.10	CHROMOSOME_IV:10115368-10118062	0	0	0.275941	0.36607	0.282922	0.390047	0.254385	0.423254	0.92649	0.997184	0.196424	0.53896	0.169216
C04G2.11	CHROMOSOME_IV:10119437-10122367	0.0344283	0.0351339	0	0	0.0504349	0.104298	0	0.0370847	0	0	0	0.288234	0
C04G2.2	CHROMOSOME_IV:10090712-10092358	0.0955581	0.243791	0.268764	0	0.139985	0.289486	0.0942505	0.154578	0.343309	0.148305	0.145785	0.200004	0.125592
C04G2.4	CHROMOSOME_IV:10095378-10095830	4.29209	2.62622	0.347639	0.0502033	0.151777	0	0.579076	0	0	0	0.141427	0	0.649797
C04G2.5	CHROMOSOME_IV:10094178-10095204	0.349568	0.178365	0	0.165647	0.128022	0	0.344784	0	0	0.544417	0	0.731647	0.229718
C04G2.6	CHROMOSOME_IV:10097186-10106535	43.523	37.8549	23.5054	14.4634	25.2683	24.5731	23.8749	39.5133	21.7669	27.3904	20.4456	32.8139	37.7555
C04G2.7	CHROMOSOME_IV:10107013-10110391	0.655671	0.352162	27.2412	26.6874	34.7468	36.6943	25.1873	23.191	19.6253	26.6141	37.9061	26.2908	30.2971
C04G2.8	CHROMOSOME_IV:10110325-10111556	2.33064	1.90303	0.349617	0	0	0	0.275873	0.100925	0	0	0.284415	0	0
C04G2.9	CHROMOSOME_IV:10112868-10114209	1.74403	0.675863	0.0827884	0	0	0	0.0435486	0.0238	0.317151	0	0	0	0
C04G6.1	CHROMOSOME_II:5104108-5108892	0.0839559	0.08287	1.86763	2.67057	5.99489	6.34462	0.638708	2.88888	3.18743	3.20543	4.94126	2.78277	2.92762
C04G6.10	CHROMOSOME_II:5101975-5102638	0.0621251	0	2.29092	9.22415	6.18858	6.77533	0.857852	2.90032	3.59524	2.52378	7.83505	4.33427	6.20546
C04G6.11	CHROMOSOME_II:5103331-5103825	0	0	0	0	0	0	0	0	0	0	0	0	0
C04G6.13	CHROMOSOME_II:5094236-5095362	0	0	0	0	0	0	0	0.0833885	0	0	0	0	0.202732
C04G6.2	CHROMOSOME_II:5093227-5094206	0	0.112232	1.03108	0	0.483329	3.99805	0.108474	1.31178	3.17827	1.71621	1.67784	0.460369	1.73453
C04G6.3	CHROMOSOME_II:5083839-5091628	14.0714	12.3595	24.7403	19.5931	33.7614	32.0962	24.4915	29.851	19.3943	26.9376	35.3174	37.4404	35.8218
C04G6.4	CHROMOSOME_II:5081486-5083433	16.7758	15.4996	25.5702	19.2838	36.995	32.4599	25.0151	28.8776	32.3699	34.567	27.1895	31.5628	30.9151
C04G6.5	CHROMOSOME_II:5085776-5086113	0	0	12.8188	14.0382	15.8571	37.9697	5.05723	11.5608	12.8381	5.54587	27.813	14.3088	8.9852
C04G6.6	CHROMOSOME_II:5099428-5100233	0.0969817	0.494845	0.545535	0.735298	0.14207	0.293798	0.191309	0.525201	0.699867	0	0.591826	0.405966	1.0197
C04G6.7	CHROMOSOME_II:5100402-5101774	0.117876	0.120292	3.61005	9.6447	5.6121	11.7842	0.871977	4.09301	7.67	5.52224	9.59113	5.09879	2.94357
C04H4.1	CHROMOSOME_II:7958792-7960186	0	0	0	0	0	0	0	0.780475	2.60009	0	0	0	0
C04H5.1	CHROMOSOME_II:14534222-14535820	28.7561	26.2838	23.3508	22.2101	28.1113	29.1525	39.5849	59.5044	32.7677	43.0812	32.4712	25.8281	31.8422
C04H5.2	CHROMOSOME_II:14535743-14537504	0	0.0622108	0	0.11555	0.178608	0.184678	0	0.460727	0	0	0	0	0.320486
C04H5.3	CHROMOSOME_II:14540743-14548716	0.122192	0.031174	0.429592	0.173708	0.469881	0.694073	0.135586	0.591299	0.164156	0.378204	0.279626	0.0639371	0.240895
C04H5.6	CHROMOSOME_II:14552429-14561521	65.8979	57.4198	25.6339	16.4503	24.5051	22.8484	39.6038	43.7408	34.1735	32.9008	19.0289	40.0592	53.3384
C04H5.7	CHROMOSOME_II:14537870-14539087	0	0	0	0	0	0	0	0	0	0	0	0	0
C04H5.8	CHROMOSOME_II:14550837-14552410	3.9682	4.98402	8.58525	12.7287	21.0167	19.4192	3.61283	3.0307	3.36551	9.6924	16.7647	5.11104	5.61656
C05A2.1	CHROMOSOME_V:10702528-10704889	2.38902	1.71022	2.20633	4.59587	7.05171	9.39779	1.51228	2.88093	4.47888	3.20628	11.859	3.58226	3.84284
C05A9.1	CHROMOSOME_X:10854254-10859228	0.00687859	0.00467918	0.249409	0.317328	0.79287	1.09772	0.150501	0.540023	0.591464	0.447133	0.832711	1.14238	0.843966
C05A9.2	CHROMOSOME_X:10842616-10844609	15.7132	18.3488	83.845	97.6493	151.396	142.096	157.758	124.261	83.6378	109	142.88	103.409	145.692
C05B10.1	CHROMOSOME_IV:6842952-6844955	2.28496	2.46632	11.0406	13.4096	21.6931	26.0912	6.67443	8.43213	8.36419	8.45359	20.3795	10.4846	12.0125
C05B5.1	CHROMOSOME_III:9987651-9988371	0.153254	0	0	0	0	0	0	0.166815	0	0	0	0	0
C05B5.11	CHROMOSOME_III:10004375-10004875	0.184658	2.26131	1.03873	0.350011	0.54102	0.559408	1.27492	0.403116	0.671477	2.90069	0	1.54596	1.45617
C05B5.12	CHROMOSOME_III:9987289-9987639	0	0	0	0	0	0	0.434905	0	0	0	0	0	0
C05B5.2	CHROMOSOME_III:9998452-10000427	0.0913781	0.0466254	0.085669	0	0.066931	0	0	0.0985258	0	0	0.278815	0.382509	0
C05B5.3	CHROMOSOME_III:9996121-9997831	0	0.178007	4.4972	3.63692	7.60202	6.86959	2.75273	5.59426	4.07192	7.30669	4.65703	4.56359	4.47049
C05B5.4	CHROMOSOME_III:9993795-9996146	12.967	17.805	10.6742	8.19273	15.5208	14.5313	11.4377	14.1604	8.9044	9.49372	15.6008	11.9151	16.211
C05B5.5	CHROMOSOME_III:10001285-10003024	0	0	0.0943966	0	0.0737496	0.762562	0.0496548	0.162911	0	0.156301	0.460829	0	0
C05B5.6	CHROMOSOME_III:10007882-10010087	0	0.0458505	0	0	0	0	0.0443149	0	0	0	0.137091	0	0.118102
C05B5.7	CHROMOSOME_III:10014502-10016444	5.11711	3.70327	16.6474	13.4466	25.9178	28.8909	17.1348	21.468	18.8623	23.1151	20.779	22.3531	13.9672
C05B5.8	CHROMOSOME_III:10005366-10006694	1.00422	1.13867	14.2269	21.361	35.6335	31.4363	10.8953	11.8587	17.3345	14.6283	41.8761	29.4258	7.62577
C05C10.1	CHROMOSOME_II:9918065-9920509	2.62773	1.81803	0.417552	0.168839	0.391467	0.809545	0	0.864302	0.639858	0.552821	0	0.559307	0.468287
C05C10.2	CHROMOSOME_II:9922188-9930771	86.3655	77.8056	26.088	13.3704	25.6189	31.2265	30.8131	59.0762	25.8907	34.6049	21.4245	46.3353	60.2996
C05C10.3	CHROMOSOME_II:9934344-9936836	50.6316	44.312	53.7423	42.7411	62.0362	57.141	42.3896	56.2998	52.3408	62.9648	74.2032	103.34	67.6767
C05C10.4	CHROMOSOME_II:9931785-9934384	0.166837	0.340778	0.234623	0.61408	1.03961	0.505811	0.329273	0.305504	0.14981	0.129499	0.382082	1.22318	0.658046
C05C10.5	CHROMOSOME_II:9939094-9940278	1023.82	845.689	274.744	110.72	102.054	152.951	216.127	145.985	179.088	115.871	111.292	176.166	204.18
C05C10.6	CHROMOSOME_II:9940701-9943988	146.321	118.165	35.6775	17.0626	25.3424	29.6684	31.9697	44.419	41.8759	35.2834	30.0314	51.5866	79.2096
C05C10.7	CHROMOSOME_II:9938046-9938904	1.63525	2.31772	1.70343	1.89416	1.33084	1.37607	1.25446	2.36022	2.62097	1.13223	2.49475	4.94372	2.1492
C05C10.8	CHROMOSOME_II:9917062-9917884	0.214859	0.219262	0	0	0	0	0	0.235154	0.783395	0	0	0	0
C05C12.1	CHROMOSOME_IV:11253962-11255698	0.837293	0.40474	0.123944	0.0835291	0.225947	0	0.239058	0.142526	0	0.0683709	0	0.368938	0.695022
C05C12.3	CHROMOSOME_IV:11248879-11259443	0.0553387	0.00941213	2.26549	2.88453	6.18812	8.41017	0.654979	5.1646	3.13727	3.10998	6.69775	3.47472	3.46686
C05C12.4	CHROMOSOME_IV:11246425-11248030	0	0.121678	3.46533	5.42408	10.6548	14.0873	1.52884	7.46566	9.64834	3.51961	14.9162	7.98585	4.23115
C05C12.5	CHROMOSOME_IV:11260308-11261148	0.264978	0	0	0.251126	0.388171	0	0	0	0	0	0	0	0
C05C12.6	CHROMOSOME_IV:11231647-11233101	0.289552	0.369357	1.08584	1.50929	2.01482	1.53506	0.214193	1.1735	1.04252	0.450354	1.98785	0.606033	0.380557
C05C8.1	CHROMOSOME_V:7239750-7241348	18.2518	14.3424	20.3136	11.4698	15.4414	13.8967	13.862	27.232	18.6658	19.7781	14.2943	20.0191	26.6811
C05C8.2	CHROMOSOME_V:7231162-7232731	82.0071	80.3289	39.6871	30.1334	49.2996	44.2281	49.5191	110.185	79.8825	105.82	37.4282	68.345	79.2057
C05C8.3	CHROMOSOME_V:7225350-7226296	7.1671	6.25908	142.785	144.862	197.871	155.326	112.085	329.322	268.139	408.468	148.663	165.008	165.75
C05C8.4	CHROMOSOME_V:7226356-7230830	111.818	103.806	49.1534	31.825	53.4185	48.9555	80.9099	60.6947	57.1838	51.4423	45.7187	66.6494	69.2752
C05C8.5	CHROMOSOME_V:7232654-7234810	28.4672	29.1959	16.965	9.94692	13.9702	14.4909	23.7184	29.0124	25.1735	29.5203	13.979	23.2892	31.4438
C05C8.6	CHROMOSOME_V:7234905-7237112	32.9653	36.8136	24.5776	14.2276	25.7666	25.0301	30.0833	36.2125	27.6236	32.2842	22.732	36.5794	39.6084
C05C8.7	CHROMOSOME_V:7242888-7247279	2.96745	2.11623	95.5528	79.1764	124.441	111.412	85.0424	92.8422	58.5264	102.148	95.3906	104.171	111.613
C05C8.8	CHROMOSOME_V:7252306-7255139	0	0	0.0897746	0.0907517	0.210416	0.145044	0.094447	0.103267	0.172014	0.148615	0.146089	0	0
C05C8.9	CHROMOSOME_V:7237374-7239644	38.2914	43.2662	22.0238	16.9004	27.5766	28.5162	49.0782	41.8034	37.1039	42.7621	25.9042	35.8973	36.1155
C05C9.1	CHROMOSOME_X:11160914-11163620	0	0	3.91415	3.81544	5.51536	6.09806	1.72804	4.21711	2.27459	4.62399	5.11828	1.87249	2.15567
C05C9.2	CHROMOSOME_X:11152998-11157577	0.0803624	0	1.50683	1.06627	1.17725	1.46071	0.317052	1.12987	1.15818	0	1.96163	2.35479	1.0562
C05C9.3	CHROMOSOME_X:11142904-11152754	0.81014	0.726193	0.26686	0.228262	0.433019	0.530651	0.799055	0.564881	0.0784107	0.575831	0.768299	0.366621	0.719435
C05D10.1	CHROMOSOME_III:6080511-6084686	55.3411	59.6698	88.9992	68.9089	112.47	122.713	71.5421	130.217	114.117	134.735	93.9235	102.325	118.196
C05D10.2	CHROMOSOME_III:6067805-6072030	1.51066	0.745892	10.013	9.73402	16.7972	15.4989	6.9232	15.3286	8.01026	10.4134	13.1012	13.5625	8.9977
C05D10.3	CHROMOSOME_III:6084621-6087404	9.94269	10.3142	2.41383	2.28435	4.73473	3.89992	4.18741	6.42785	3.83093	6.11044	3.59368	6.19143	10.0797
C05D10.4	CHROMOSOME_III:6088633-6102810	3.70294	2.71492	30.629	30.7959	45.183	52.9063	17.814	41.0742	44.7327	38.878	31.2466	23.5795	26.8978
C05D11.1	CHROMOSOME_III:6436555-6439906	71.5507	58.433	29.5563	18.4488	27.172	29.438	30.3609	32.5076	33.6797	31.1559	28.2495	43.9231	47.0506
C05D11.10	CHROMOSOME_III:6430984-6431740	53.4202	56.1778	56.0839	77.6513	59.8432	50.4184	74.4997	68.3123	52.1619	63.602	65.3409	76.0007	66.9977
C05D11.11	CHROMOSOME_III:6440092-6442948	379.789	335.01	174.539	116.197	135.859	157.846	159.953	153.608	217.441	180.834	132.164	176.046	203.813
C05D11.12	CHROMOSOME_III:6444639-6446891	138.643	121.942	99.9706	76.6836	118.828	106.654	126.364	137.265	121.143	142.146	129.788	164.786	124.079
C05D11.13	CHROMOSOME_III:6442629-6443919	8.89019	10.8197	24.0782	28.4594	31.5457	27.3312	18.4464	42.109	22.0378	27.0246	23.3082	39.144	46.7373
C05D11.2	CHROMOSOME_III:6433184-6436448	28.527	26.1028	17.4007	11.4926	20.7739	19.2102	20.5764	28.6396	22.1341	23.6638	18.1779	25.061	30.3393
C05D11.3	CHROMOSOME_III:6432128-6433101	151.814	127.863	69.6151	56.9684	74.207	72.421	92.5713	101.89	111.024	108.36	58.8697	97.8177	108.301
C05D11.4	CHROMOSOME_III:6407075-6409981	2.05077	2.00046	16.9079	18.864	29.0702	30.0583	22.1605	14.0609	16.7682	14.7677	27.882	17.2953	19.66
C05D11.5	CHROMOSOME_III:6409699-6411506	1.37477	0.654708	2.06221	2.25837	4.02788	5.13654	2.48593	4.94108	5.9259	4.55097	3.35579	2.30193	3.01143
C05D11.6	CHROMOSOME_III:6411526-6414940	0.30986	0.351553	0.996382	0.908675	1.02377	1.95886	0.3541	1.37753	0.453836	0.873772	1.31467	1.50651	1.18072
C05D11.7	CHROMOSOME_III:6415718-6421659	134.226	122.899	55.8258	31.1157	43.3568	50.846	57.9011	50.9465	47.5787	48.1205	54.7784	67.4209	75.3933
C05D11.8	CHROMOSOME_III:6422405-6427252	12.792	11.6187	11.868	9.76352	18.8229	22.3993	15.8977	20.1193	14.9854	18.3613	16.8768	21.4826	25.4311
C05D11.9	CHROMOSOME_III:6427477-6430882	27.7433	26.0094	12.6916	7.84039	14.8122	14.6195	12.7752	24.0496	15.6495	16.626	12.175	20.1134	23.8875
C05D12.1	CHROMOSOME_II:11411817-11415708	0.098623	0.0967066	5.47275	5.93592	9.82168	9.08354	4.31461	5.23885	6.08832	4.18541	11.7838	7.825	7.14403
C05D12.2	CHROMOSOME_II:11418249-11423317	0	0.0157599	0.0868713	0.292722	0.180988	0.374277	0.0533124	0.166073	0.221305	0	0.282727	0.129293	0.0811887
C05D12.3	CHROMOSOME_II:11424685-11430535	0.122585	0.0938035	3.06526	3.55764	6.58076	11.4206	1.26689	4.19587	4.31708	3.0915	7.69284	2.83113	3.61131
C05D12.4	CHROMOSOME_II:11429919-11432702	96.4005	94.3629	35.0985	14.629	18.9172	13.3041	40.2404	47.8128	51.2028	39.3575	16.4178	38.4504	47.9402
C05D12.5	CHROMOSOME_II:11434156-11434894	61.635	66.8512	16.6251	8.6478	12.1061	13.039	6.53766	35.768	29.4792	24.6651	9.71831	16.5757	28.2844
C05D12.7	CHROMOSOME_II:11410049-11411911	0.247065	0.504256	4.63258	11.2392	15.925	23.9509	3.65527	8.67755	14.4543	7.8051	7.5385	4.13686	3.89659
C05D2.1	CHROMOSOME_III:5624971-5632447	33.753	27.8483	32.221	25.0421	36.8674	35.8009	28.7922	33.4022	24.4473	32.6722	31.9212	30.4033	37.0399
C05D2.10	CHROMOSOME_III:5597913-5600018	134.17	120.191	77.2207	44.1504	48.2352	60.4657	65.8973	118.213	97.5591	116.751	48.3584	66.7632	90.371
C05D2.3	CHROMOSOME_III:5614929-5617230	0.0332093	0	0	0.0629467	0.048649	0	0	0.178839	0.238316	0.102949	0	0	0.174587
C05D2.4	CHROMOSOME_III:5612231-5614637	0.232624	0.30522	5.55155	7.2424	11.6908	15.2001	3.86786	8.57413	10.6127	7.45188	12.5775	5.23997	6.37702
C05D2.5	CHROMOSOME_III:5604416-5607511	34.399	34.1491	16.3729	7.35723	10.0785	14.0974	12.5196	9.5344	12.0187	11.3625	8.70247	12.9535	19.9731
C05D2.6	CHROMOSOME_III:5600339-5603722	75.0301	66.7402	30.6025	21.0287	26.7224	31.6877	38.3972	43.232	37.489	41.8916	27.9378	38.0752	51.4846
C05D2.8	CHROMOSOME_III:5607465-5610304	1.28454	1.26991	2.03224	2.73914	4.46917	4.13464	2.81108	4.54239	4.75597	4.85613	3.55197	4.36889	5.17031
C05D9.1	CHROMOSOME_X:1128980-1132922	60.4339	55.1967	46.4469	29.3047	33.6873	36.7254	32.9565	48.7524	54.6072	57.4375	39.7885	48.9616	52.585
C05D9.2	CHROMOSOME_X:1125166-1128285	0.0592902	0.0605052	4.22581	4.38392	8.77519	9.25793	1.78657	5.33996	3.51679	7.00233	9.95104	5.95655	1.81476
C05D9.3	CHROMOSOME_X:1111899-1116791	9.25728	10.8392	62.0009	57.9351	75.0545	67.0766	73.8352	71.1416	43.4693	74.9114	61.2493	63.9052	62.4135
C05D9.4	CHROMOSOME_X:1108063-1108413	0	0	2.57352	2.60153	1.00531	10.3948	3.38433	1.56095	2.60009	0	4.18784	2.87267	1.80388
C05D9.5	CHROMOSOME_X:1104208-1106244	26.563	30.4685	68.0651	64.3274	101.215	85.6766	45.0548	93.6236	76.815	105.117	72.5298	95.9079	90.1494
C05D9.7	CHROMOSOME_X:1117193-1119404	75.6543	95.8082	94.0004	74.2912	93.8506	92.3068	109.489	141.061	110.806	137.226	91.3817	106.835	105.08
C05D9.9	CHROMOSOME_X:1122417-1124231	0	0	1.04908	0.353476	2.04891	2.9951	0.459841	1.41341	2.69066	1.03075	1.42254	1.38462	1.7157
C05E11.1	CHROMOSOME_X:4588738-4590420	64.6431	68.8759	49.9158	36.1467	58.077	53.5799	111.741	71.799	79.8385	73.8259	50.9739	74.195	70.5498
C05E11.2	CHROMOSOME_X:4586889-4587966	0	0	0	0.363143	0	0	0.188964	0.209249	0	0	0	0	0
C05E11.3	CHROMOSOME_X:4579479-4581630	13.8979	15.6195	51.267	45.5405	66.4676	79.8027	47.0365	69.2431	43.2317	55.8153	77.1895	61.7892	60.1704
C05E11.4	CHROMOSOME_X:4571421-4573888	0.0301583	0.0615527	0.226193	0.114328	0.0883594	0.548175	0.0297457	0.0649463	0	0	0.27606	0.252486	0.0792739
C05E11.5	CHROMOSOME_X:4565275-4569534	0.0497949	0	4.71507	4.05851	6.0545	7.01453	1.71898	4.8233	6.60592	5.63022	6.91306	5.0026	5.23562
C05E11.6	CHROMOSOME_X:4562168-4562811	0	0	0	1.02531	1.32071	1.63872	0.177844	1.18042	2.62167	2.26505	1.65051	0.754783	0.947927
C05E11.7	CHROMOSOME_X:4581570-4585638	0.424165	0.618368	3.35175	2.18225	4.39398	3.76315	2.51017	1.56592	0.760777	1.31459	3.32801	3.04382	2.15028
C05E11.8	CHROMOSOME_X:4591253-4592477	0.159089	0.162349	9.84393	31.0775	26.8012	33.7364	1.55637	13.5139	21.9332	13.963	36.8916	15.9828	7.52724
C05E4.1	CHROMOSOME_V:762734-764658	20.1679	19.3966	8.36839	6.27905	7.15407	8.52381	7.98691	19.7447	20.7158	18.874	6.5572	12.0242	19.507
C05E4.10	CHROMOSOME_V:734420-736272	0	0.112892	0	0	0	0	0.0545552	0.059689	0	0	0	0	0
C05E4.11	CHROMOSOME_V:736803-738871	0	0.0977196	0	0	0	0	0.0472235	0.0516336	0	0	0	0	0
C05E4.12	CHROMOSOME_V:758039-761979	2.24335	2.59457	0.934751	1.2284	1.31453	1.66126	2.4585	1.82823	1.79135	1.39291	1.36899	2.50417	4.71747
C05E4.13	CHROMOSOME_V:751326-752780	0	0	0.301345	0.304625	0.7063	0.48687	0.158515	0.0578016	0	0	0.163457	0.672749	0.422451
C05E4.14	CHROMOSOME_V:728309-734280	0.63752	1.17136	1.65292	1.46696	0.730267	1.1559	0.881687	1.42353	0.637296	1.32393	1.78332	2.108	3.01339
C05E4.2	CHROMOSOME_V:756469-757893	0	0	0	0	0	0	0	0	0	0	0	0	0
C05E4.3	CHROMOSOME_V:753334-755049	0	0	11.7999	10.0728	15.5015	11.7212	12.2761	7.74102	5.86105	7.37868	13.5124	11.5129	7.47459
C05E4.4	CHROMOSOME_V:748344-750468	0.0496367	0	0	0	0	0	0	0	0	0	0	0	0.130475
C05E4.6	CHROMOSOME_V:743648-745476	0.117406	0	0	0	0	0	0	0	0	0	0.179117	0	0
C05E4.7	CHROMOSOME_V:742120-743274	0.195665	0.599023	0	0	0.286634	0.592751	0.385974	0.427563	0	0	0	0	0.514322
C05E4.9	CHROMOSOME_V:724207-728104	102.538	118.275	771.095	558.931	677.614	557.473	612.575	379.882	449.292	430.891	848.173	697.428	407.024
C05E7.1	CHROMOSOME_X:12941370-12943477	0.86076	1.464	18.9372	27.8448	49.9335	56.672	3.28274	25.8893	49.5205	39.9322	46.5743	25.4622	21.4191
C05E7.2	CHROMOSOME_X:12938626-12940641	0	0.462468	5.34119	21.8427	23.1408	36.087	0.89396	12.0264	41.2297	15.8988	32.9886	10.8401	6.97718
C05E7.3	CHROMOSOME_X:12945545-12946492	0.861017	1.93306	1.61445	2.61123	6.30663	4.17343	1.69847	3.19186	1.25099	4.32331	5.25431	4.32507	3.16857
C05E7.4	CHROMOSOME_X:12965414-12968386	0.0726168	0.370525	0.40848	0	0.106378	0	0.0716231	0.0784823	0.261458	0.225893	0	0.303975	0
C05G5.1	CHROMOSOME_X:14734376-14740019	0.304986	0.684719	4.80365	5.54963	9.02497	10.0709	4.39187	10.2462	7.7678	7.27833	7.07241	7.02169	6.41346
C05G5.2	CHROMOSOME_X:14747250-14750321	28.4735	32.068	16.8668	12.1854	24.0711	18.3127	25.4341	19.6968	18.1462	16.4951	21.0062	22.6934	29.6354
C05G5.3	CHROMOSOME_X:14750787-14751942	5.57169	7.63105	16.3581	15.0076	25.9899	17.9895	14.0279	25.594	18.7423	24.4034	23.7112	18.413	18.8852
C05G5.4	CHROMOSOME_X:14753954-14756390	164.584	162.039	198.314	144.254	177.448	185.731	202.004	189.236	185.662	154.028	144.001	205.508	217.174
C05G5.5	CHROMOSOME_X:14756005-14760894	5.12146	6.42229	7.3243	5.18281	10.2365	5.78529	8.94694	12.4455	10.2874	13.3321	9.27009	13.8079	15.7439
C05G5.7	CHROMOSOME_X:14743600-14743711	48.7708	149.311	944.959	1633.16	738.272	689.489	1411.04	561.125	439.846	475.021	1488.11	1156.88	683.726
C05G6.1	CHROMOSOME_IV:627536-633965	2.1759	1.84471	6.90447	4.37813	4.36446	5.88186	4.02812	7.4995	4.44427	4.8775	4.90277	6.58602	5.01561
C05H8.1	CHROMOSOME_III:5635436-5654514	0.145998	0.238386	6.59824	8.35016	11.8449	12.9391	4.46513	6.88189	5.96686	5.32656	9.80347	6.96723	6.83014
C06A1.1	CHROMOSOME_II:10559957-10563349	174.306	168.553	85.7219	47.5048	66.3809	77.8829	82.3218	73.534	92.7657	72.2925	69.0761	107.276	116.518
C06A1.2	CHROMOSOME_II:10568844-10572056	0.160153	0.163436	4.10404	15.077	15.6017	22.8032	4.10702	5.52953	9.97815	4.31044	16.126	2.23468	5.61305
C06A1.3	CHROMOSOME_II:10572203-10574011	0.461016	0.0470463	0	0	0.0337677	0.279322	0.113677	0.0497094	0	0.143077	0.140666	0.192981	0.121182
C06A1.5	CHROMOSOME_II:10579306-10580552	376.045	374.862	168.178	161.814	171.329	140.041	268.432	155.077	148.788	156.399	129.209	205.393	223.635
C06A1.6	CHROMOSOME_II:10564114-10564618	0	0.182573	0.167729	0	0	0	0	0	0	0	0	0	0
C06A1.7	CHROMOSOME_II:10564851-10565341	0	0	0.175233	0	0	0	0	0	0	0	0	0	0
C06A12.3	CHROMOSOME_IV:17427679-17429566	2.10479	1.87077	5.09494	5.72063	7.83784	10.5552	7.4336	5.0612	4.41046	5.06692	7.02558	3.4904	4.38249
C06A12.4	CHROMOSOME_IV:17432939-17440054	0	0	0.172002	0.0434613	0.268769	0.199577	0	0.0493526	0	0.0710171	0.279895	0.0959819	0.120557
C06A12.5	CHROMOSOME_IV:17429718-17431931	0.266594	0.163234	1.89954	0.909575	0.820136	1.85755	0.894019	0.172182	0.0956016	0.0825975	1.54554	1.78554	0.140154
C06A12.8	CHROMOSOME_IV:17437300-17438118	0	0	0	0	0	0	0	0	0	0	0	0	0
C06A5.1	CHROMOSOME_I:6012059-6021985	31.8795	24.9717	12.4834	6.7884	11.2992	13.4873	17.0868	17.5937	12.1753	11.5101	12.231	18.7741	25.2193
C06A5.10	CHROMOSOME_I:5982520-5982971	3.56387	1.13654	2.22748	3.37758	2.2841	0	5.71206	5.4831	0	7.39774	2.0389	6.5268	5.46465
C06A5.11	CHROMOSOME_I:5991072-5993213	9.12771	7.81121	6.33386	4.01878	7.37006	6.53191	4.64319	11.9625	9.54392	13.8172	7.0175	9.77781	10.2018
C06A5.12	CHROMOSOME_I:6004654-6007597	6.48688	6.42512	21.4645	13.3805	16.2107	13.8717	17.689	11.2518	7.63571	8.39626	19.2108	20.7649	20.0604
C06A5.2	CHROMOSOME_I:6006334-6007326	2.3714	1.39615	0.513056	0	0	0	0.539758	0.49368	0.657863	0.568378	0	0.381795	0.479495
C06A5.3	CHROMOSOME_I:5986493-5990843	21.9398	22.9979	25.9286	18.5138	35.2512	29.2351	28.4733	50.2125	38.0274	50.067	33.1371	40.6836	40.5845
C06A5.4	CHROMOSOME_I:5980792-5981590	0.100152	0.562124	0.469474	0.379667	0.806932	0.910208	0.592689	0.488268	2.16884	0.312304	0.152792	0.628854	0.921404
C06A5.5	CHROMOSOME_I:5981817-5982454	1.7698	4.04039	4.03689	2.6975	4.38341	3.64802	5.58588	3.09628	2.59539	3.33478	4.50934	5.19352	5.89903
C06A5.6	CHROMOSOME_I:5978691-5985873	20.4504	18.8086	8.4181	5.23823	7.81657	9.01604	12.1192	10.7547	9.37309	9.7433	7.07014	8.54471	13.4136
C06A5.7	CHROMOSOME_I:5992664-6001101	42.648	41.5401	48.0758	45.8164	75.2101	82.9284	51.3849	50.1287	54.9465	53.9763	75.7905	70.0231	85.6341
C06A5.8	CHROMOSOME_I:6008079-6009608	10.7478	7.48435	6.19929	3.94324	2.86178	2.58075	2.42893	8.12861	13.4774	9.61748	3.01677	10.4298	10.873
C06A5.9	CHROMOSOME_I:6009782-6011525	39.252	36.4814	12.3457	4.16001	10.0163	10.4846	20.9393	14.7401	20.4606	18.9869	12.1054	17.491	23.6309
C06A6.2	CHROMOSOME_IV:7846629-7854550	36.4399	42.4118	30.9478	26.5517	51.3225	40.2951	48.6584	47.8571	37.2324	32.5921	37.1064	38.8477	57.4783
C06A6.3	CHROMOSOME_IV:7830549-7832428	66.8871	60.356	24.8156	20.818	40.3845	29.2797	40.4064	34.1925	37.5092	29.8485	37.0306	47.3546	44.893
C06A6.4	CHROMOSOME_IV:7826315-7829289	74.7351	68.0084	36.281	27.8428	30.64	38.079	34.4988	47.5691	47.0822	50.4337	33.3545	29.8334	57.6701
C06A6.5	CHROMOSOME_IV:7832330-7834663	12.3209	14.899	71.5523	72.1115	101.45	107.764	82.8192	99.3867	60.5907	110.448	98.876	104.122	86.0942
C06A6.7	CHROMOSOME_IV:7837360-7837973	0.126997	0	0	0.722151	1.30229	0.769456	0.125259	2.75828	0	2.38173	0.774993	2.12644	0.667646
C06A8.1	CHROMOSOME_II:7773827-7777780	48.1554	49.6779	97.4172	90.0551	98.2673	112.234	56.2171	59.5091	64.7454	52.8846	97.7095	87.3764	87.4074
C06A8.2	CHROMOSOME_II:7779289-7781202	78.1736	69.127	36.1867	18.2572	31.6459	27.8053	42.5793	55.5251	48.7179	48.1504	29.9222	51.7148	59.8112
C06A8.3	CHROMOSOME_II:7790507-7791517	1493.87	1966.52	1402.6	1217.49	1172.93	973.037	1819.87	1037.2	1235.85	1062	1410.99	1948.53	1654.03
C06A8.4	CHROMOSOME_II:7783764-7784595	59.4075	48.2078	20.131	10.4012	14.0968	15.901	22.0416	27.6933	30.6572	20.7936	13.8315	23.6362	35.747
C06A8.5	CHROMOSOME_II:7781526-7783296	79.1914	96.9704	60.6824	39.1685	80.5621	59.8752	139.91	89.8884	93.7595	86.3788	52.6788	97.1048	114.945
C06A8.6	CHROMOSOME_II:7772514-7773860	0.244228	0	0	0	0	0	0	0.210723	0	0	0.298077	0	0
C06A8.7	CHROMOSOME_II:7763884-7765464	0	0	0	0	0.169395	0	0	0.062406	0.207901	0	0.176413	0	0
C06A8.8	CHROMOSOME_II:7765309-7771965	2.76567	2.61782	14.7711	26.9512	31.9012	23.0534	20.973	9.23045	17.2048	8.92503	28.3709	12.6224	11.2105
C06A8.9	CHROMOSOME_II:7785021-7794267	1.48169	1.47437	1.3846	1.60392	4.07659	4.91983	1.57609	2.38296	1.03524	1.54039	4.31613	3.04535	2.70059
C06B3.1	CHROMOSOME_V:13902780-13903872	0	0	0	0	0	0	0	0	0	0	0	0	0
C06B3.10	CHROMOSOME_V:13918626-13920018	0	0	0	0	0	0	0	0	0	0	0	0	0
C06B3.11	CHROMOSOME_V:13921015-13922390	0	0	0	0	0	0	0	0	0	0	0	0	0
C06B3.12	CHROMOSOME_V:13924136-13925793	0	0	0.119704	0	0.0935218	0	0	0.0689442	0	0	0.194793	0	0
C06B3.13	CHROMOSOME_V:13926683-13929306	0	0	0	0	0	0	0	0	0	0	0	0	0.106447
C06B3.14	CHROMOSOME_V:13929788-13931238	0	0	0	0	0	0	0	0	0	0	0	0	0
C06B3.16	CHROMOSOME_V:13931510-13932184	0	0	0	0	0	0	0	0	0	0.490076	0	0	0
C06B3.2	CHROMOSOME_V:13899498-13902639	0	0.0501095	0	0	0.179831	0.0743773	0.0484313	0.0792693	0	0	0.29965	0.102773	0.387217
C06B3.3	CHROMOSOME_V:13896642-13898474	0.10313	0.0701626	0.0644581	0.325799	0.453235	0.624852	0.271251	1.22196	1.60368	1.70528	0.839132	0.719509	0.632538
C06B3.4	CHROMOSOME_V:13906475-13908023	6.93161	6.60981	14.9147	10.2308	22.6391	13.3394	15.1866	16.3726	15.7299	21.1797	19.5896	22.5942	16.7269
C06B3.5	CHROMOSOME_V:13904596-13905982	0	0	0	0	0.0715549	0	0	0	0	0	0.149039	0	0
C06B3.6	CHROMOSOME_V:13908113-13909499	3.92902	2.73135	3.29002	6.02128	6.92067	9.17812	10.0251	4.50033	7.6581	5.07251	19.0049	47.5574	5.81049
C06B3.7	CHROMOSOME_V:13909733-13911510	0	0	0.110495	0	0.431633	0.178522	0.232492	0.127225	0.423841	0.183094	0.539419	1.72674	0.154901
C06B3.8	CHROMOSOME_V:13912065-13915422	0	0	0.392313	0.705036	1.32818	1.61982	0.343943	0.950639	0.50005	1.22409	1.48961	0.973145	0.427758
C06B3.9	CHROMOSOME_V:13916481-13918037	0.0528322	0	0	0	0	0	0	0	0	0	0	0	0.138874
C06B8.1	CHROMOSOME_V:15479525-15481659	0.76015	0.724014	3.80085	2.88166	4.38001	5.37324	3.54882	6.3411	3.82433	5.50688	3.5564	5.93973	4.12946
C06B8.10	CHROMOSOME_V:15493961-15495743	0	0	0	0	0.081028	0	0	0.059689	0	0	0	0	0
C06B8.11	CHROMOSOME_V:15486369-15487100	0	0	0	0	0	0	0	0	0	0	0	0	0
C06B8.2	CHROMOSOME_V:15476045-15478548	0.0537592	0	9.6469	7.95677	15.1957	16.7355	5.69185	11.2807	10.2101	8.89501	17.5078	11.7488	10.2997
C06B8.3	CHROMOSOME_V:15484035-15484619	0	0	0	0	0	0	0	0	0	0	0	0	0
C06B8.4	CHROMOSOME_V:15491049-15492752	0	0	0	0	0	0	0	0	0	0	0	0	0
C06B8.6	CHROMOSOME_V:15496250-15497549	0.0514137	0.157402	0.0964031	0.389809	0.602538	0.467262	0.608523	0.166389	0.369543	0	0.156875	0	0.405436
C06B8.7	CHROMOSOME_V:15498724-15511403	8.39273	11.1904	21.5112	17.3533	27.6811	23.5474	34.3634	29.6989	14.3506	25.6338	25.8032	27.5331	29.1862
C06B8.8	CHROMOSOME_V:15512147-15512755	1244.97	1458.11	5044.63	6596.94	3815.69	3734.1	2050.48	3260.39	3728.4	3573.59	4643.16	3377.8	2521.48
C06B8.9	CHROMOSOME_V:15488045-15489383	0	0	0	0	0	0	0	0	0	0	0	0	0
C06C3.1	CHROMOSOME_II:9358471-9369040	63.0545	62.2497	100.688	73.5109	119.946	114.347	126.085	140.852	96.3938	115.264	89.8121	106.312	132.278
C06C3.10	CHROMOSOME_II:9375799-9377150	0.143224	0.146159	10.742	9.7731	14.6869	6.50829	2.54275	3.73823	3.6323	3.13822	18.3544	15.5879	4.8942
C06C3.12	CHROMOSOME_II:9375047-9375789	0.208975	0.284343	0.261225	1.05627	0.612263	2.5323	1.09928	1.36311	1.5137	1.3078	1.70034	2.33272	1.09862
C06C3.3	CHROMOSOME_II:9369118-9372312	0.0902972	0.0614319	1.24162	2.1109	2.73375	2.46195	1.09843	2.1066	2.15938	1.49251	2.29598	1.63794	1.89883
C06C3.4	CHROMOSOME_II:9373231-9374795	0.0293517	0.119813	7.42983	7.00998	8.4706	9.86999	4.28461	6.40012	5.38315	7.66033	12.0904	13.6382	6.32659
C06C3.6	CHROMOSOME_II:9383318-9384936	0.427345	0.339191	0.267098	0	0.347794	0	0.515165	0.10241	0.341172	0.442146	0.579523	0.795054	0.249626
C06C3.7	CHROMOSOME_II:9385479-9386478	15.4685	12.767	5.09166	1.65442	1.56277	0.881397	3.1566	8.19313	5.94887	4.83734	2.95912	6.08949	7.64775
C06C3.8	CHROMOSOME_II:9386524-9390841	0	0.0699012	0.0642179	0.0649169	0.100344	0.103754	0	0.184453	0.122898	0.106182	0.313502	0.143365	0
C06C3.9	CHROMOSOME_II:9376395-9378223	0.140721	0.0957368	5.36513	4.08987	4.87878	4.97355	1.85061	3.04743	1.52284	3.80091	5.29559	6.47966	2.95919
C06C6.1	CHROMOSOME_V:16010689-16012092	0	0.0516015	0	0.191688	0	0	0	0	0	0	0	0	0
C06C6.2	CHROMOSOME_V:16008311-16009644	0	0.168123	0	0	0	0	0	0	0	0	0	0	0.144351
C06C6.3	CHROMOSOME_V:16006283-16007585	0.0545246	0.222568	0	0	0	0	0.0537786	0	0	0	0	0.456481	0
C06C6.4	CHROMOSOME_V:16002574-16004708	0.294638	0.150339	2.94646	5.77089	10.4309	11.7524	3.87476	4.55486	3.35243	5.18306	9.73925	9.04462	5.42138
C06C6.5	CHROMOSOME_V:15997758-16000633	0.53373	0.830757	7.10018	10.6573	14.1222	20.2831	9.09859	12.625	13.9127	11.3064	32.9747	19.4605	12.2626
C06C6.6	CHROMOSOME_V:15988733-15991587	0.019974	0.0203833	0	0.0378598	0	0	0	0	0	0	0	0	0.0525034
C06C6.7	CHROMOSOME_V:15992185-15995587	0.0882485	0.0180114	0.066188	0	0	0	0.0174082	0.094918	0	0.0546399	0.0538531	0	0
C06C6.8	CHROMOSOME_V:15997115-15997750	0	0	0.381493	0	0	0	0	0	0.741077	0	0	0	0
C06C6.9	CHROMOSOME_V:15996193-15996725	0	0	0	0	0	1.17024	0	0	0	0	0	0	0
C06E1.1	CHROMOSOME_III:8605751-8606424	328.852	381.623	235.43	214.802	253.272	201.793	407.117	344.134	288.29	294.642	220.966	385.917	376.822
C06E1.10	CHROMOSOME_III:8609796-8614489	13.1884	13.3497	11.063	7.81822	14.0403	12.6573	13.6136	20.0928	10.0885	12.9711	11.445	13.5782	14.0353
C06E1.11	CHROMOSOME_III:8614681-8616244	0.403185	0.365731	0.671991	0.424566	0.393757	0.40714	0.883707	0.869377	0.643614	1.25115	0.136689	0.750104	0.942051
C06E1.3	CHROMOSOME_III:8581021-8583849	0.359286	0.36665	5.85582	9.4818	11.8626	18.3359	2.61689	4.73059	6.24438	4.28173	13.5768	5.78452	6.97415
C06E1.4	CHROMOSOME_III:8584105-8588535	0	0.0680966	4.06641	3.47826	8.18682	9.40003	1.21759	5.221	4.7219	4.28617	5.75186	4.74859	4.51664
C06E1.5	CHROMOSOME_III:8589216-8589462	0	0	1.54466	0	1.20679	2.49562	0	0	0	0	2.51358	0	0
C06E1.6	CHROMOSOME_III:8590752-8590902	0	0	0	0	0	0	0	0	22.2242	0	0	0	0
C06E1.7	CHROMOSOME_III:8591158-8593012	0	0	0.247415	0.416846	0.386597	0.666227	0.130145	0.616422	0.4739	0.818875	0.805225	0.184116	0.693691
C06E1.8	CHROMOSOME_III:8595287-8597790	0.214609	0.255508	13.4804	13.0848	18.3915	16.3619	24.2717	11.4056	5.00634	9.20525	20.736	18.2664	17.0175
C06E1.9	CHROMOSOME_III:8606427-8609703	21.1469	18.1203	12.0085	6.42662	11.3319	12.1735	12.2123	16.3807	13.958	16.1051	12.2611	19.0289	21.3896
C06E2.1	CHROMOSOME_X:8872880-8874581	0.111025	0.1133	4.37172	4.62974	8.53877	9.58575	2.13537	4.61278	5.98721	5.51765	9.14658	3.25326	3.50207
C06E2.2	CHROMOSOME_X:8879595-8880353	0	0	0	0	0	0	0	0	0	0	1.75645	0	0
C06E2.3	CHROMOSOME_X:8869571-8871782	0	0.572084	0.175191	0.354195	0.410615	0.283047	0.0921543	0.303494	0.337022	0.582358	0	0.39111	0
C06E2.5	CHROMOSOME_X:8856997-8857901	133.759	131.995	89.8055	76.3869	70.71	66.4668	105.097	130.672	111.283	118.308	45.5864	75.2251	98.8667
C06E2.7	CHROMOSOME_X:8867557-8869203	1.08474	1.10697	0.508484	0.899534	0.496581	2.46461	0.534949	0.732413	0.975991	0.421616	1.65489	0.851386	0.712834
C06E2.8	CHROMOSOME_X:8866184-8866587	0	0	0	0	0	0	0.29533	0	0	0	0	0	0
C06E2.9	CHROMOSOME_X:8861204-8861597	1.59232	0.541653	0	0	0.777546	0	4.1881	0	1.98742	3.43415	1.61951	2.22183	1.39519
C06E4.1	CHROMOSOME_IV:7283245-7283860	0	0	0.480231	0	0	0	0	0	0	0	0	0	0
C06E4.2	CHROMOSOME_IV:7276871-7283075	0.598854	0.305563	99.3745	174.805	114.923	125.178	131.717	61.7395	40.6962	44.6632	108.72	36.3486	69.2622
C06E4.3	CHROMOSOME_IV:7260873-7262017	0	0.0699075	0	0.129845	0.100353	0.207527	0.135132	0.444061	0	0	0.209019	0.286756	0
C06E4.4	CHROMOSOME_IV:7258641-7259526	0	0	0	0	0	0	0	0	0	0	0	0	0
C06E4.5	CHROMOSOME_IV:7254978-7256253	0	0.274331	0	0	0	0	0	0.0969898	0	0	0	0	0
C06E4.6	CHROMOSOME_IV:7257205-7258237	0.0702846	0.0717249	0.395361	0	0.205924	0.212922	0.138646	0.0759461	0	0	1.07227	0.882636	0.18475
C06E4.7	CHROMOSOME_IV:7262225-7263225	0	0	1.23386	2.13821	2.3411	4.84133	0.556319	0.407163	0.339108	1.75788	1.721	1.96755	1.23551
C06E4.8	CHROMOSOME_IV:7284207-7285509	0.0702846	0	0.131787	0	0.102962	0.212922	0.0693229	0.227838	0	0	0.428908	1.17684	0
C06E7.1	CHROMOSOME_IV:5848643-5850838	93.6677	89.1657	123.588	92.279	109.212	138.769	57.0996	77.67	80.3956	66.9397	95.8789	98.2159	102.825
C06E7.2	CHROMOSOME_IV:5839387-5843992	0.570632	0.82227	5.28687	7.0556	12.5366	13.1093	5.1306	8.98567	8.66348	8.38179	9.99277	6.59718	7.48074
C06E7.3	CHROMOSOME_IV:5843970-5846387	80.4308	72.6762	98.02	67.0461	103.039	120.155	60.6666	62.2362	75.2644	61.2893	83.3406	84.3232	83.5196
C06E7.4	CHROMOSOME_IV:5850827-5859965	13.0704	10.8057	97.5969	91.6966	170.386	145.152	99.4612	120.684	100.087	119.708	98.2382	111.642	117.161
C06E7.6	CHROMOSOME_IV:5864517-5865891	0.195665	0	0	0	0.286634	0	0.192988	0.213781	0.712196	0	0	0	0
C06E7.7	CHROMOSOME_IV:5867677-5870161	0	0	0	0	0	0	0	0	0	0	0	0	0
C06E7.88	CHROMOSOME_IV:5865846-5867361	0.0884006	0	74.4241	79.7582	116.939	85.1613	36.3587	50.3244	29.9606	53.698	111.938	65.4981	49.9593
C06E8.3	CHROMOSOME_III:6990115-7002255	6.22013	4.1647	7.64676	8.03492	9.2677	12.8382	5.5725	7.46701	8.30321	6.81939	11.6389	9.43683	9.5787
C06E8.5	CHROMOSOME_III:7002244-7005307	0.240774	0.300309	0.601948	4.46233	4.66367	16.5332	0.448571	3.11012	5.75618	2.98392	6.77513	1.79179	1.54707
C06G1.1	CHROMOSOME_X:16633289-16637560	1.18244	0.970583	39.5307	43.1886	60.9676	69.4305	17.7549	32.566	48.5891	44.0575	64.2432	34.5356	33.1853
C06G1.2	CHROMOSOME_X:16621737-16622666	0.343543	0.280466	52.8209	66.1587	87.8697	103.241	14.028	34.9636	57.1265	43.1597	79.8746	24.7348	22.2146
C06G1.4	CHROMOSOME_X:16613375-16617594	130.262	144.757	326.73	240.5	306.311	305.323	359.761	483.266	291.7	485.33	261.538	355.141	362.45
C06G1.5	CHROMOSOME_X:16638171-16642988	1.27842	0.449131	28.4115	26.8934	38.0697	42.6016	20.5469	25.7275	19.6808	24.7917	35.1067	25.7923	23.468
C06G1.6	CHROMOSOME_X:16652031-16654410	0.591672	0.474412	30.3108	32.7635	43.3067	40.0736	29.0746	27.1003	20.5256	26.1096	29.6589	22.8214	24.8842
C06G3.1	CHROMOSOME_IV:7050090-7053424	9.51198	6.98711	14.3866	13.2462	24.0978	22.572	12.7613	22.8418	26.6926	27.1983	25.0308	20.9414	17.2462
C06G3.10	CHROMOSOME_IV:7034390-7039569	9.54493	10.0852	12.4402	10.5814	18.1429	15.3026	13.2572	18.5497	11.3724	16.1267	15.8947	19.4872	22.0395
C06G3.11	CHROMOSOME_IV:7043923-7044593	126.983	116.827	258.332	310.08	99.8352	143.104	237.223	121.806	85.067	138.528	195.833	172.552	180.934
C06G3.2	CHROMOSOME_IV:7040197-7043683	69.3716	57.4273	26.4015	13.3207	21.6144	24.9331	45.5216	51.8	46.6751	44.1936	16.6462	35.1603	49.6449
C06G3.3	CHROMOSOME_IV:7036111-7036458	0	0	1.86028	5.64161	2.18009	1.50279	0	2.2241	1.85236	0	4.54081	2.07652	0
C06G3.4	CHROMOSOME_IV:7028446-7030992	0	0	0	0.043471	0	0	0.0226206	0.024679	0	0.071033	0.0699779	0	0
C06G3.5	CHROMOSOME_IV:7024199-7028135	9.68053	11.92	53.7793	56.1085	85.9078	75.4974	51.0151	81.779	60.1755	97.4038	76.2848	102.312	98.4198
C06G3.6	CHROMOSOME_IV:7017614-7020191	31.8255	33.9118	63.6526	59.227	107.21	95.4948	54.3279	146.653	88.3443	134.042	90.1286	107.385	100.17
C06G3.7	CHROMOSOME_IV:7011991-7016569	39.1972	40.3329	43.6813	29.3773	48.0753	60.3011	47.8821	69.1419	54.1696	66.969	44.543	66.482	60.8834
C06G3.8	CHROMOSOME_IV:7031279-7032548	61.0187	50.3965	31.8831	22.6691	21.6915	21.9357	21.1847	21.9114	18.1758	18.996	27.0584	35.0784	42.13
C06G3.9	CHROMOSOME_IV:7032687-7036850	7.44375	9.50583	23.3915	19.2612	34.952	34.6446	30.847	45.4822	28.2052	45.8534	29.6114	41.4386	41.1536
C06G4.1	CHROMOSOME_III:7987063-7990484	19.6893	16.8817	11.1599	6.20301	10.3257	12.91	13.4965	13.287	8.054	9.4635	9.38184	14.9033	16.0701
C06G4.2	CHROMOSOME_III:7981001-7986272	111.976	100.959	54.1264	47.1992	57.3458	82.1958	60.6468	78.2392	72.7999	61.9104	67.3297	75.7067	86.2101
C06G4.4	CHROMOSOME_III:7977150-7979695	0	0.168171	0	0.312359	0	0	0	0.538679	0	0	1.00565	0.689828	0
C06G4.5	CHROMOSOME_III:7990723-7996383	1.62131	1.65453	0.777681	0.786146	1.21516	2.17026	0.669401	0.934392	1.89478	0.70159	1.61065	0.946997	0.792885
C06G4.6	CHROMOSOME_III:8004331-8005770	0	0	0.826836	0.835833	0.807481	1.33588	0.326201	0.836794	0	0.688148	1.68187	0.461473	0.579562
C06G8.1	CHROMOSOME_IV:10778965-10780691	5.86823	7.81731	7.44528	7.12668	11.9939	14.158	5.33737	17.2987	11.7276	13.8367	12.9733	12.2086	15.7023
C06G8.2	CHROMOSOME_IV:10790577-10794544	0	0	2.64103	2.52349	6.61408	6.95578	1.19893	2.84356	3.73393	2.80783	7.94779	4.44223	2.13015
C06G8.3	CHROMOSOME_IV:10799633-10802229	3.56664	3.39664	5.92689	6.10946	9.92765	12.7046	8.57424	8.35003	8.97042	8.12587	13.4646	9.06827	12.5374
C06G8.4	CHROMOSOME_IV:10785069-10786811	0	0	0	0.115703	0	0.184924	0	0.065906	0	0	0	0	0
C06H2.1	CHROMOSOME_V:11122742-11123851	796.279	811.823	529.124	360.466	483.636	531.258	462.33	385.586	472.971	371.635	482.999	547.803	471.692
C06H2.2	CHROMOSOME_V:11125203-11127286	10.1026	8.76147	9.76239	6.53553	17.0726	12.9524	9.04619	19.7216	12.9917	18.3868	11.9935	17.4643	18.2173
C06H2.3	CHROMOSOME_V:11127476-11130067	8.24145	6.72793	5.22223	4.14843	6.19437	3.9055	4.11946	8.15148	6.55401	6.37216	6.49502	7.40457	8.733
C06H2.4	CHROMOSOME_V:11141479-11143045	2.18871	1.91449	1.50757	1.69331	3.59891	2.57104	2.64339	1.73367	0.962596	2.35637	2.86212	3.17865	3.99205
C06H2.5	CHROMOSOME_V:11134590-11140305	0.321471	0.109343	0.935559	3.0815	2.63131	3.01975	0.211381	1.69428	2.8223	1.66585	1.84454	0	1.5426
C06H2.6	CHROMOSOME_V:11124277-11125040	130.033	130.055	70.2267	85.5039	98.9094	68.6989	131.926	59.9333	77.4312	47.6866	88.6048	65.8277	105.159
C06H2.7	CHROMOSOME_V:11143040-11144732	27.2835	22.4288	8.94426	5.11259	8.22877	8.64349	10.8608	14.7074	16.3323	12.7272	8.8417	16.7954	31.7572
C06H5.1	CHROMOSOME_V:17895280-17896778	0.0239089	0.0243989	0.672593	1.87025	2.03165	2.75296	0.896304	1.78273	1.18592	1.18765	2.9187	2.90305	2.0744
C06H5.2	CHROMOSOME_V:17899801-17901887	0.0234267	0.0239069	0.746747	1.24332	1.61297	2.12909	0.785612	1.56624	1.09405	1.30879	1.85849	2.25549	1.66264
C06H5.6	CHROMOSOME_V:17879817-17888958	0.787906	0.833833	10.3416	7.41189	11.0719	9.98964	10.0739	9.29998	5.96617	7.59628	10.5958	9.40592	9.81846
C06H5.7	CHROMOSOME_V:17910290-17917218	4.5724	6.00506	17.7433	17.4842	23.1233	23.6082	14.2746	16.0685	21.9826	18.0058	30.5718	24.2995	19.0213
C06H5.8	CHROMOSOME_V:17919010-17921727	1.51644	1.97442	1.86292	0.693809	1.60865	0.950474	1.18624	1.46677	0.939698	1.62375	2.87194	1.09446	2.06179
C07A12.1	CHROMOSOME_X:4554664-4558829	1.51504	1.88393	31.6123	35.691	47.8258	48.3116	37.9445	47.2217	25.7262	37.402	33.6529	28.8298	44.4049
C07A12.2	CHROMOSOME_X:4544847-4545390	0	0	8.63704	8.73104	13.4958	13.9545	7.57213	0	0	5.30902	18.7398	6.42734	0
C07A12.3	CHROMOSOME_X:4532662-4537506	9.67457	9.99185	18.303	16.3213	22.0869	22.4283	24.7048	17.1025	14.6316	13.9808	22.095	22.4989	26.4151
C07A12.4	CHROMOSOME_X:4524158-4526508	1892.8	2289.02	3001.03	2344.27	2298.52	2396.57	3697.77	2526.77	2274.81	2167.55	2042.27	2646.88	2791.22
C07A12.5	CHROMOSOME_X:4514070-4516866	58.3639	53.5469	25.6174	15.4469	30.4307	26.2612	35.3825	31.0715	29.5648	26.038	26.5111	30.1002	38.3275
C07A12.7	CHROMOSOME_X:4517714-4521041	36.7283	41.546	58.2656	56.4372	75.5838	78.3684	68.2246	74.6675	75.9963	70.2463	78.603	65.4574	67.9704
C07A4.1	CHROMOSOME_X:10167036-10171823	0.2154	0.192337	3.38254	4.79729	5.9559	6.11754	1.67307	5.07209	5.02092	5.92296	5.09356	2.81771	2.54789
C07A4.2	CHROMOSOME_X:10172266-10174098	0.11481	0.0781086	0.574064	1.01555	2.07432	2.43466	0.717181	1.07215	0.824262	1.3056	0.934163	0.640795	1.71013
C07A4.3	CHROMOSOME_X:10174925-10175868	0	0	0	0	0	0	0	0	0	0	0	0	0
C07A9.1	CHROMOSOME_III:9723197-9725130	0	0	0	0.110704	0	0	0.0576058	0	0	0	0	0	0
C07A9.10	CHROMOSOME_III:9685085-9686642	0	0	0.768192	0.465932	0.360101	0.74468	0.242452	0.531778	0.590526	0.2551	0	0.342995	0.215383
C07A9.11	CHROMOSOME_III:9715798-9720207	0	0.0234864	1.33777	1.43957	2.22519	3.76496	0.476697	2.2413	2.47516	2.56617	2.84404	1.9268	1.60315
C07A9.12	CHROMOSOME_III:9725200-9727455	0.241921	0.185159	3.8557	5.96115	11.5178	10.81	2.80367	5.48484	2.61033	7.32961	11.6259	8.60779	6.20013
C07A9.13	CHROMOSOME_III:9679613-9681185	0	0.0682791	4.14003	3.29734	4.99876	6.28347	1.58382	4.11973	3.37095	6.86498	7.75773	2.24062	2.81397
C07A9.2	CHROMOSOME_III:9694583-9696433	278.22	274.604	113.13	83.7432	131.017	122.629	151.213	226.387	210.673	174.929	90.3563	130.959	139.36
C07A9.3	CHROMOSOME_III:9699796-9710212	335.978	326.441	145.681	100.003	160.067	174.132	274.132	205.893	164.072	154.325	147.573	181.697	252.191
C07A9.4	CHROMOSOME_III:9710164-9713844	0	0.0287396	0	0	0.123767	0.170632	0	0.0757969	0	0	0.0429649	0.117888	0.0370137
C07A9.5	CHROMOSOME_III:9681439-9682745	0.157952	0.0537296	3.94889	3.09371	5.63043	6.53955	1.01264	4.7147	2.83856	4.4144	7.14888	2.75495	5.95106
C07A9.6	CHROMOSOME_III:9676244-9678956	0.399397	0.188114	5.9911	6.17278	11.5667	10.238	6.15141	12.8692	10.8008	12.5692	8.81178	9.77406	11.7906
C07A9.7	CHROMOSOME_III:9690953-9694488	44.2512	46.2836	27.4335	15.5299	29.3924	26.3784	33.8235	31.7147	33.3777	38.2399	26.1467	43.6385	44.1373
C07A9.8	CHROMOSOME_III:9686848-9690169	0.0721539	0.0736326	0.067646	0.136765	0	0	0	0.0388662	0.25896	0	0.220158	0.302036	0.0948314
C07A9.9	CHROMOSOME_III:9663207-9667445	7.61955	6.6378	21.4886	21.7225	25.2281	24.7719	19.3687	24.3474	16.044	22.7178	39.3154	33.1921	22.634
C07B5.2	CHROMOSOME_X:9516449-9517130	0.188443	0	0	0	0	0	0	0	0	0	0	0	0
C07B5.3	CHROMOSOME_X:9522432-9523170	0.150741	0	0.56529	0.857164	1.54576	1.82662	0.148678	0.164042	0.546495	0.472158	1.83976	0	0.396235
C07B5.4	CHROMOSOME_X:9529475-9536577	0.218471	0.0557374	8.05404	9.25715	17.4438	17.5375	6.75994	12.6424	15.376	15.2059	20.1229	14.9291	12.8528
C07B5.5	CHROMOSOME_X:9539847-9542373	65.0533	82.0213	74.0742	53.9747	76.4384	50.6658	111	107.798	81.3567	126.149	60.4534	87.1337	70.3183
C07B5.6	CHROMOSOME_X:9518964-9521429	0.398005	1.11694	1.49255	0.943005	3.061	2.71289	2.15908	2.47924	2.87284	3.41283	2.12521	4.16513	3.66168
C07B5.8	CHROMOSOME_X:9536603-9536918	4.05317	2.06812	7.59989	7.68261	0	3.68364	4.79726	6.76445	1.50235	9.08597	7.42029	1.69666	6.39248
C07C7.1	CHROMOSOME_IV:9185048-9186008	0	0	0	0.923074	1.16128	0.885154	0.19212	0.210978	0.351429	0	0.891514	0.407687	0.256006
C07D10.1	CHROMOSOME_II:7398966-7400504	0.199626	0.254645	6.92467	4.16218	8.69996	7.71056	2.55962	7.21321	6.09723	7.59191	7.91831	6.26723	3.93549
C07D10.2	CHROMOSOME_II:7394721-7397308	41.598	40.4613	34.3215	32.8679	65.2812	51.225	50.9312	27.5352	31.499	32.2147	58.9653	50.5447	43.8581
C07D10.3	CHROMOSOME_II:7387118-7389099	0	0	0	0.289443	0.149133	0.154202	0.0502048	0.109816	0.182921	0.316079	0.465933	0.213073	0.133798
C07D10.4	CHROMOSOME_II:7400500-7402664	3.06145	3.29082	8.72536	19.5749	26.5499	41.5495	2.41565	13.11	16.8545	13.8022	17.4368	9.56872	10.1932
C07D10.5	CHROMOSOME_II:7381394-7383447	104.201	125.92	110.864	95.0404	172.959	130.949	242.422	240.962	179.704	232.336	122.076	199.302	269.28
C07D10.6	CHROMOSOME_II:7379133-7379569	0	0	0	0	0	0	0	0	0	0	0	0	0
C07D8.5	CHROMOSOME_X:7344000-7344505	0	0	0	0	0	0	0	0	0	0	0.697881	0	0
C07D8.6	CHROMOSOME_X:7341462-7342737	452.042	404.535	167.684	85.3231	105.684	154.531	176.461	128.686	282.036	126.411	107.166	169.817	162.976
C07E3.1	CHROMOSOME_II:10346920-10349947	54.6765	52.3898	23.7747	15.9063	25.1368	25.48	37.9697	50.4455	31.0736	36.6465	19.0236	34.6346	45.8657
C07E3.10	CHROMOSOME_II:10346336-10346948	0.518553	0.52918	24.6319	37.6776	41.7802	34.5602	7.84237	23.7477	16.325	15.7318	69.0905	22.4302	15.448
C07E3.2	CHROMOSOME_II:10339631-10345056	63.7937	63.9067	47.2101	28.1143	48.7459	40.561	41.1737	67.0536	44.7668	59.5284	37.2239	60.5186	63.0908
C07E3.3	CHROMOSOME_II:10353572-10357460	0.168982	0.086222	19.272	18.6651	22.5267	22.8772	11.5547	11.2347	13.0498	12.7597	26.1049	32.0104	19.2127
C07E3.4	CHROMOSOME_II:10360810-10362937	1.78876	0.725959	0.425293	0.322441	0.128377	0.0468495	0.12711	0.183182	0.221912	0	0.739257	0.172629	0.392956
C07E3.5	CHROMOSOME_II:10363523-10365649	0	0.136352	1.67021	1.35071	3.52321	3.50802	1.09821	2.92903	1.11975	2.21128	2.85379	2.42366	3.39508
C07E3.6	CHROMOSOME_II:10367667-10369537	36.9022	34.1608	46.3048	36.219	72.4223	50.4914	44.9639	48.6528	51.4416	55.8104	49.9952	41.6644	57.6327
C07E3.8	CHROMOSOME_II:10352044-10353403	1.06153	1.3541	0.497603	0.503019	0.233258	0.643162	0.628201	0.515386	0.953871	1.15377	0.485843	0.222178	1.25564
C07E3.9	CHROMOSOME_II:10350699-10351557	5.1339	4.40561	8.09484	7.51946	8.37539	4.94861	3.10724	4.68399	2.95217	5.82996	5.69624	5.86104	6.13405
C07F11.1	CHROMOSOME_I:444001-461610	51.5174	47.6024	58.9985	39.1988	48.021	71.5178	39.7546	40.4	30.984	36.0838	56.2662	47.7243	61.8368
C07F11.2	CHROMOSOME_I:420924-423721	0.656598	1.12851	1.23116	1.17905	1.46811	2.09381	0.579444	1.00506	2.10818	2.14285	1.37076	0.14466	0.545029
C07G1.1	CHROMOSOME_IV:8210569-8213709	0.262052	0.427712	0.745096	0.62919	1.0436	0.893925	0.395207	1.13579	0.881018	0.336126	1.48192	0.184824	1.16543
C07G1.2	CHROMOSOME_IV:8206599-8210921	0.298124	0.113661	0.231662	0.584609	0.501897	1.14658	0.339377	1.20042	0.659523	0.730742	0.829354	0.827491	1.68606
C07G1.3	CHROMOSOME_IV:8176470-8188866	84.6964	70.0206	60.9044	44.0642	72.2066	79.9615	46.7012	70.2331	58.0139	71.219	69.1647	74.7088	95.6038
C07G1.4	CHROMOSOME_IV:8188887-8198937	50.1198	43.4518	57.8839	50.3111	74.7163	72.7352	49.7376	50.7285	47.2616	51.0986	61.8292	52.4535	64.3318
C07G1.5	CHROMOSOME_IV:8201364-8206034	58.2687	58.5192	44.7876	35.9348	73.1126	69.9081	73.4684	69.7264	51.9801	57.7922	59.244	81.0357	84.1013
C07G1.6	CHROMOSOME_IV:8209142-8210381	0.16655	0.0849813	0	0	0	0	0	0	0	0	0.50818	0	0
C07G1.7	CHROMOSOME_IV:8210891-8211814	0	0	0	0	0	0	0	0	0	0	0	0	0
C07G1.8	CHROMOSOME_IV:8200587-8201221	125.756	96.127	65.1823	83.1997	81.668	62.6048	44.3997	127.371	104.629	122.538	65.4993	78.4591	92.2199
C07G2.1	CHROMOSOME_III:4489325-4491366	41.4338	31.9806	46.2244	22.3026	22.5433	30.0182	13.6654	9.99183	41.2864	12.3105	14.1642	25.4122	27.0672
C07G2.2	CHROMOSOME_III:4491595-4499450	119.381	117.075	156.133	159.674	226.417	235.178	245.002	209.004	237.25	216.552	220.038	222.688	233.149
C07G2.3	CHROMOSOME_III:4499159-4508084	313.8	299.229	234.534	179.034	252.679	237.138	309.077	217.063	283.84	246.883	276.025	312.528	249.714
C07G3.10	CHROMOSOME_V:3502303-3503074	0	0	0	0.171857	0.132822	0	0.268281	0.294441	0.32697	0	0	0	0.476657
C07G3.2	CHROMOSOME_V:3523578-3524572	0.311918	0.524989	0.194822	1.95083	2.43761	4.07304	0.304333	2.70357	5.22748	1.62112	1.26678	9.14088	2.97795
C07G3.3	CHROMOSOME_V:3518185-3519798	1.07897	0.935921	0	0.204514	0	0	0.106421	0	0	0	0.493828	0	0.425425
C07G3.4	CHROMOSOME_V:3512677-3514340	0.278571	0.0568561	0	0	0	0	0.0549521	0.0601253	0	0	0	0	0
C07G3.5	CHROMOSOME_V:3510174-3512035	0.0497981	0.101637	0	0.0943897	0	0	0	0	0	0	0	0	0.130899
C07G3.6	CHROMOSOME_V:3507818-3509248	0.930229	0.614248	0.205203	0.207436	0.721437	0	0.701619	0.295231	0.393417	0.509853	0.166961	0.229055	0.431504
C07G3.8	CHROMOSOME_V:3493633-3500939	0.0381113	0.0777847	0.0714605	0.0722383	0.223321	0.115455	0.0375898	0.287456	0	0	0.116286	0	0.300537
C07G3.9	CHROMOSOME_V:3503126-3506349	16.6325	20.426	8.71123	3.02435	10.0232	6.88285	13.6466	13.9975	12.416	14.6643	9.45539	15.778	17.5249
C07H4.1	CHROMOSOME_II:9091046-9093634	0.0915711	0	1.3736	1.90926	5.0975	7.49001	0.451591	1.88352	1.98152	2.28265	7.82331	4.59981	1.20352
C07H4.2	CHROMOSOME_II:9094617-9098784	38.5187	40.2186	27.2103	19.7204	36.7711	35.0374	28.9918	36.5381	30.2802	33.9264	36.3169	43.0582	43.6772
C07H6.1	CHROMOSOME_III:7521396-7524770	9.11521	7.16711	5.48367	3.72254	7.91178	6.46695	5.8954	8.72778	6.04474	7.93292	6.90428	8.66782	9.09026
C07H6.2	CHROMOSOME_III:7520937-7521398	120.405	103.702	96.9476	103.768	85.9641	74.7941	117.169	115.157	102.086	99.9977	87.8876	95.86	68.66
C07H6.3	CHROMOSOME_III:7508109-7515214	1.40126	1.25699	11.2937	10.7954	17.2662	17.6305	7.95814	15.6099	9.79361	13.2866	14.7921	11.5421	13.3966
C07H6.4	CHROMOSOME_III:7499642-7503180	87.6477	76.3831	48.7553	26.2112	39.8474	36.1633	58.637	82.6071	55.294	61.0487	36.3206	78.1001	87.0786
C07H6.5	CHROMOSOME_III:7495201-7497768	144.376	143.159	108.747	75.0926	113.25	95.0957	136.528	43.1853	66.1919	50.8191	82.9653	83.633	112.332
C07H6.6	CHROMOSOME_III:7515156-7518458	5.77145	5.56552	5.22885	3.71342	6.36045	6.57662	7.55516	7.9921	5.31237	6.22895	6.73165	9.60463	11.3665
C07H6.7	CHROMOSOME_III:7528602-7536567	9.99002	10.2395	36.7133	35.3515	58.2177	57.8734	41.606	38.2159	34.6195	41.7097	50.9103	29.7131	47.4184
C07H6.8	CHROMOSOME_III:7518560-7520739	48.343	42.9797	31.6916	18.4664	27.4156	29.9598	30.1763	46.4114	36.6429	41.5759	26.9655	54.0254	60.1435
C07H6.9	CHROMOSOME_III:7498264-7499525	0.719663	1.83602	1.51808	1.36409	1.97672	1.90764	1.41963	1.46058	1.62194	1.40132	1.64689	4.14221	2.12816
C08A9.1	CHROMOSOME_X:17092643-17094149	0.438472	0.671187	1.37026	1.10814	1.28466	0.442772	0.720787	1.57969	2.36818	1.1367	1.78383	1.22363	0.960469
C08A9.10	CHROMOSOME_X:17081028-17081970	0.125953	0.771204	0	0	0.184511	0.381564	0	0	0	0	0	0	0.662157
C08A9.3	CHROMOSOME_X:17087807-17093225	0.0235504	0.168274	0.176672	0	0.103519	0.0713442	0.0464632	0.101396	0.0844547	0	0.215615	0	0.0599262
C08A9.6	CHROMOSOME_X:17094208-17096463	23.446	23.8813	7.88004	8.84628	9.3319	13.8035	11.6498	12.7815	14.776	9.81483	10.1909	11.3885	18.8378
C08A9.7	CHROMOSOME_X:17099037-17100678	64.5074	74.1597	16.6388	8.98151	12.3684	10.9618	18.567	29.6724	36.8178	28.4683	9.06913	24.5235	35.3281
C08A9.8	CHROMOSOME_X:17102770-17104797	3.38168	2.46499	1.94106	0.697667	1.011	2.29979	2.17823	1.5627	1.57007	1.21371	0.561538	3.37041	3.38631
C08A9.9	CHROMOSOME_X:17106531-17108296	0.237851	0.242724	0	0	0.0871079	0	0.211008	0.320956	0.213848	0	0	0.24891	0.156303
C08B11.1	CHROMOSOME_II:8017628-8020734	73.0395	57.5317	35.4011	20.7447	22.2964	33.7951	32.9743	30.432	29.4437	28.7614	31.8372	40.7314	45.0492
C08B11.2	CHROMOSOME_II:8020727-8022510	36.3459	33.8201	22.178	15.4326	24.9193	29.2248	20.7272	31.4853	27.9955	34.4745	25.0536	38.7723	39.0745
C08B11.3	CHROMOSOME_II:8022261-8027707	194.316	189.686	102.733	64.168	115.573	108.982	166.865	159.389	103.202	124.486	89.2447	143.488	180.957
C08B11.4	CHROMOSOME_II:8028902-8032659	1.98472	1.28111	5.01063	3.63746	8.94663	7.72855	4.63106	8.66379	4.30708	5.83075	8.09099	9.16914	6.7575
C08B11.5	CHROMOSOME_II:8034292-8035717	454.95	418.038	178.353	111.813	120.395	100.593	266.478	133.934	109.841	112.396	99.5125	144.36	198.283
C08B11.6	CHROMOSOME_II:8035817-8037296	69.1893	68.2976	28.9657	15.1362	23.9709	26.6987	34.7679	46.2856	40.7465	43.8681	20.2447	45.8594	43.3489
C08B11.7	CHROMOSOME_II:8038218-8039545	56.8908	59.3354	37.5939	29.1674	46.3329	37.3544	34.0629	75.8002	68.0839	78.586	29.9761	58.5396	55.9961
C08B11.8	CHROMOSOME_II:8039953-8041685	20.0134	20.1418	10.0286	5.69018	10.7163	10.3488	20.9648	11.2249	14.116	11.8749	13.0553	14.7331	17.2333
C08B11.9	CHROMOSOME_II:8037387-8038115	75.725	88.9561	53.1114	46.4586	58.26	55.7618	78.7338	108.756	81.2018	100.775	42.4861	90.6244	81.2245
C08B6.1	CHROMOSOME_V:10102565-10104921	0.0318219	0	1.5517	3.01646	3.77682	5.8819	0.533687	5.72432	5.25286	3.45258	6.99248	3.46401	3.01197
C08B6.10	CHROMOSOME_V:10125026-10127512	0.733484	0.810892	0.916878	2.20129	2.41762	7.22162	1.4469	2.37579	4.17724	3.98893	3.54355	3.07037	1.28535
C08B6.11	CHROMOSOME_V:10107763-10109873	0	0	1.18654	1.64136	3.85442	4.23766	0.525597	2.94149	1.67306	1.54873	2.33732	1.25475	2.27621
C08B6.12	CHROMOSOME_V:10119548-10120961	0	0	0	0	0	0	0	0	0	0	0	0	0
C08B6.13	CHROMOSOME_V:10121108-10122745	0.064923	0.132507	0	0	0	0	0	0.0701196	0	0	0.396189	0.271768	0
C08B6.14	CHROMOSOME_V:10100130-10101991	0	0	0	0	0.0615466	0	0	0	0	0	0	0	0
C08B6.2	CHROMOSOME_V:10105686-10106666	0	0	0	0.192308	0	0.307383	0	0	0	0	0.309595	0.424736	0.245098
C08B6.3	CHROMOSOME_V:10109372-10113440	0	0	2.08377	1.01484	2.89391	2.86965	0.893672	2.13068	2.36606	2.29975	2.88912	2.41446	1.8404
C08B6.4	CHROMOSOME_V:10114739-10117311	0.0308239	0	36.6162	91.5291	136.014	159.922	9.5925	110.724	230.133	130.536	139.751	34.3885	92.5753
C08B6.5	CHROMOSOME_V:10117739-10119663	0	0	0.138778	0.280577	0.271059	0.448434	0	0.0797418	0.132827	0.114759	0.225831	0.464729	0.097275
C08B6.6	CHROMOSOME_V:10123612-10124729	0	0	0	0	0	0	0	0	0	0	0	0	0
C08B6.7	CHROMOSOME_V:10130378-10134125	54.855	54.1345	41.1859	26.1234	49.4504	53.8952	57.5518	48.0057	41.7875	38.7935	54.9629	55.4033	66.1713
C08B6.8	CHROMOSOME_V:10134635-10143065	81.0308	80.3698	40.3007	33.1564	55.3875	38.2591	33.1138	68.5359	51.9942	49.072	39.4918	59.1047	49.4861
C08B6.9	CHROMOSOME_V:10127468-10130272	91.1452	77.7068	40.8612	20.9401	34.4707	42.3191	35.7194	49.9649	50.708	46.2489	34.0541	44.2282	51.0397
C08C3.1	CHROMOSOME_III:7814316-7817062	5.69561	5.80712	21.025	17.9915	28.8939	27.7783	16.2735	24.6518	19.2414	25.4425	24.1011	17.0387	14.5187
C08C3.2	CHROMOSOME_III:7774623-7775962	17.4327	13.2297	4.14346	2.97853	4.38816	4.46292	4.26223	6.72635	6.70486	4.72574	3.4462	9.04462	9.03565
C08C3.3	CHROMOSOME_III:7776841-7783389	1.05601	1.64484	22.9272	23.4927	32.8937	33.5065	17.1584	20.3929	12.5885	24.5143	29.1688	16.5186	18.7003
C08C3.4	CHROMOSOME_III:7793377-7795344	104.931	95.1157	58.6396	26.5181	34.345	37.8574	48.7292	26.5736	50.3255	28.9876	27.2265	43.9291	53.1287
C08D8.1	CHROMOSOME_V:8345738-8349889	0.239804	0.0815729	0.0749407	0	0	0	0.0394205	0.0430721	0.143491	0	0.12195	0.167303	0
C08D8.2	CHROMOSOME_V:8336637-8340655	0.513629	0.141698	16.9603	18.9423	31.7025	26.3803	16.2973	19.0986	12.6166	18.9058	23.0597	21.9209	21.4299
C08E3.1	CHROMOSOME_II:1633811-1634095	0.927704	0	3.47898	24.1783	21.0648	66.9815	2.28752	4.29257	10.7253	6.17758	14.389	92.5538	3.25141
C08E3.10	CHROMOSOME_II:1619803-1621268	0	0	0.403201	0.304928	0.55127	0.488573	0.763392	0.985743	0.772955	1.19467	0.820152	3.59795	0.787033
C08E3.11	CHROMOSOME_II:1621648-1622854	0	0	0	0	0	0	0.186631	0	0	0	0	1.58415	0
C08E3.12	CHROMOSOME_II:1623913-1624679	0	0	0	0	0	0	0	0	0	0	0	0	0
C08E3.13	CHROMOSOME_II:1632000-1633856	0.66305	0.427635	2.48651	19.7945	16.9983	55.2388	2.27951	3.01121	10.0316	8.66696	13.6562	68.0013	1.74288
C08E3.14	CHROMOSOME_II:1625972-1626890	0	0	0	0	0	0	0	0	0	0	0	0	0
C08E3.15	CHROMOSOME_II:1627485-1627890	0	0	0	0	0	0	0	0.92226	0	2.65452	0	0	2.01802
C08E3.2	CHROMOSOME_II:1611337-1612517	0.456038	0.186153	0	0	0	0	0.0899597	0.0987361	0	0.284189	0	0	0.239748
C08E3.3	CHROMOSOME_II:1604672-1606150	14.278	13.7529	5.73684	2.48541	2.98803	3.31027	2.08365	7.0072	9.44251	6.79841	2.22272	6.40369	11.2976
C08E3.4	CHROMOSOME_II:1606596-1607613	0	0	0	0	0	0	0	0	0	0	0	0.251516	0
C08E3.5	CHROMOSOME_II:1607881-1609008	0	0	0	0.212756	0.246646	0	0	0	0	0	0.684971	0.939719	0.442571
C08E3.6	CHROMOSOME_II:1609261-1610722	1.58493	1.57121	0.509456	0.257501	0.132675	0.274368	0.848621	0.585891	0.975927	0.843176	0.138172	1.70602	0.952262
C08E3.7	CHROMOSOME_II:1612794-1614066	0	0	0	0	0	0	0	0	0	0	0	0	0
C08E3.8	CHROMOSOME_II:1614799-1616470	0	0	0	0	0	0	0	0	0	0	0	0.176191	0
C08E3.9	CHROMOSOME_II:1616918-1619011	0.0471419	0	0.176787	0.17871	0.0690593	0.285626	0.139491	0.508359	0.677424	0.438958	0.431521	0.394672	0.123917
C08E8.1	CHROMOSOME_V:18361006-18362515	0	0	0	1.2753	0.985625	4.0765	0	0	0.818401	0.707078	2.05292	0	0
C08E8.10	CHROMOSOME_V:18339091-18339879	0.386293	0	9.41611	24.1626	18.6743	11.7024	12.1923	10.2987	10.0069	11.1159	25.9307	11.3192	9.13864
C08E8.11	CHROMOSOME_V:18350992-18352644	0	0	0	0	0	0	0	0	0	0	0	0	0
C08E8.2	CHROMOSOME_V:18353481-18355814	0	0	0	0	0	0	0	0	0.406549	0	0	0	0
C08E8.3	CHROMOSOME_V:18350119-18350527	0	0	0	0.601887	2.79105	1.92394	4.07157	0.350683	1.16828	2.01872	12.5956	2.65847	3.33876
C08E8.4	CHROMOSOME_V:18371817-18373503	0.0623679	0.063646	1.52025	0.591078	1.91865	0.944695	1.23029	0.875484	1.12177	1.74454	9.51493	9.65968	2.4591
C08E8.5	CHROMOSOME_V:18359789-18359960	0	0	0	0	4.2513	0	0	0	0	0	0	0	0
C08E8.6	CHROMOSOME_V:18367985-18368394	0	0	0.497614	0.50303	0.388773	0.803973	0	0.894849	0.993708	0	0.809758	1.11091	0
C08E8.9	CHROMOSOME_V:18364829-18365196	0	0	0.802879	0.811617	0.627269	1.29718	0	1.47875	1.64211	0	1.30651	1.79241	0
C08F1.1	CHROMOSOME_II:1797857-1801383	0.0364778	0.0744508	0.0683976	0	0	0	0	0.117898	0	0	0	0	0
C08F1.10	CHROMOSOME_II:1785267-1786283	122.12	156.82	148.71	123.593	195.3	162.955	270.858	232.791	206.733	249.365	142.987	213.387	207.01
C08F1.11	CHROMOSOME_II:1783281-1784448	12.1453	14.9365	33.1083	39.3125	45.8484	47.9255	63.9806	56.4254	44.5857	63.879	49.4106	38.8471	43.2215
C08F1.3	CHROMOSOME_II:1789186-1790223	38.9317	44.2941	12.3044	6.69327	8.5354	7.6666	13.9317	20.2028	20.5299	21.7602	8.08092	17.738	22.8959
C08F1.4	CHROMOSOME_II:1767853-1778545	0.028773	0.0293626	2.60086	2.92428	4.48303	4.97812	1.8568	3.93831	4.13545	3.45115	5.90675	4.78665	4.08176
C08F1.5	CHROMOSOME_II:1778777-1782313	0.133383	0.097226	3.75149	3.35891	6.22476	7.14522	1.42834	5.28067	3.1411	4.89674	7.0931	4.78578	4.95861
C08F1.6	CHROMOSOME_II:1787220-1788193	209.961	244.939	93.9783	64.6057	81.4118	79.8519	158.486	140.52	155.577	138.653	88.9445	110.881	124.409
C08F1.8	CHROMOSOME_II:1804162-1808323	3.32215	3.39024	1.31276	1.09286	0.804413	2.07938	1.29984	1.98026	2.01851	2.67972	1.71736	1.66648	2.74246
C08F11.1	CHROMOSOME_IV:13623810-13625518	0	0	0.161711	0.326943	0.505364	1.04508	0.255192	0.186644	0	0	0.26315	0.361018	0.2267
C08F11.10	CHROMOSOME_IV:13648012-13649186	0.449185	0.229196	0.280748	0	0	0	0.0738399	0	0	0	0	0	0.393575
C08F11.11	CHROMOSOME_IV:13646706-13647634	0	0.191345	0	6.04703	1.64933	0	0.369324	0	0	0	0	0	0
C08F11.12	CHROMOSOME_IV:13650635-13651487	0	0	0	0	0	0	0.339929	0	0	0	0	0	0
C08F11.13	CHROMOSOME_IV:13607415-13609859	0.0872953	0.13361	4.24469	4.67509	8.24867	11.7418	4.25113	3.71333	2.67172	4.74163	15.6679	10.4149	2.40758
C08F11.17	CHROMOSOME_IV:13649737-13650314	0	0	0	0	0	0	0	0	0	0	0	0	0
C08F11.2	CHROMOSOME_IV:13621806-13623110	0	0	0	0	0	0	0	0	0	0	0	0	0
C08F11.3	CHROMOSOME_IV:13619483-13621489	0.107518	0	0	0	0.157506	0.16286	0	0	0	0	0.164031	0	0
C08F11.4	CHROMOSOME_IV:13626744-13632673	0	0	0	0	0	0	0	0	0	0	0	0	0
C08F11.5	CHROMOSOME_IV:13633414-13635196	0	0	0.196097	0.693809	0.536218	1.58412	0.464182	0.112828	0.751758	0.487125	2.87194	3.94004	0.824713
C08F11.7	CHROMOSOME_IV:13637263-13638501	0	0.0691855	0.127121	0	0.0993163	0.616151	0.200606	0.0732413	0.243998	0.210808	0	0	0.178209
C08F11.8	CHROMOSOME_IV:13639241-13644377	0.0476439	0.0324131	2.67925	3.81762	9.26569	9.75632	1.95768	8.36983	5.12345	5.20834	11.6271	6.31408	4.00678
C08F11.9	CHROMOSOME_IV:13644438-13645899	0	0	0	0	0.0887157	0	0	0	0	0	0	0	0
C08F8.1	CHROMOSOME_IV:11149832-11150911	130.229	136.409	150.382	156.702	130.932	113.598	177.093	263.262	234.767	251.205	131.914	192.793	149.126
C08F8.2	CHROMOSOME_IV:11149167-11154314	21.6576	16.7265	10.1629	7.11261	10.126	11.8698	8.95458	11.0318	8.49295	8.68928	8.40261	11.5983	15.5816
C08F8.3	CHROMOSOME_IV:11155007-11156674	125.935	110.24	35.2035	12.5922	20.2046	21.2194	41.0598	41.0361	58.1822	47.3571	17.8468	40.3536	57.0385
C08F8.4	CHROMOSOME_IV:11157127-11159471	2.78938	3.20237	0.356607	0	0.417911	0.192051	0.406431	1.33127	0.341156	0.589501	0.0967165	0.132686	0.91652
C08F8.5	CHROMOSOME_IV:11159548-11162508	7.68303	7.14044	2.05801	0.572112	2.17062	1.49626	1.67796	4.96246	3.7394	4.16596	1.00468	1.83778	3.89485
C08F8.6	CHROMOSOME_IV:11162764-11164267	4.50335	3.04711	1.19318	0.371126	0.501951	0.296577	0.820756	2.85085	1.05526	1.06368	0.896135	0.819612	1.80135
C08F8.7	CHROMOSOME_IV:11177264-11178057	0	0.33995	4.99697	8.4189	12.688	8.40977	1.64283	7.8271	5.61624	4.5057	9.14791	9.76119	3.79446
C08F8.8	CHROMOSOME_IV:11169812-11174764	5.48693	7.70823	19.374	11.6158	20.4602	19.4286	19.7849	22.2619	15.2164	19.1122	15.8722	18.3448	21.8217
C08F8.9	CHROMOSOME_IV:11178056-11178576	120.676	164.425	197.68	236.278	88.391	126.547	158.918	257.458	157.998	151.674	145.666	55.5113	78.4309
C08G5.1	CHROMOSOME_II:734656-738673	0	0	0	0	0	0	0	0.0174161	0	0	0	0	0.0425684
C08G5.2	CHROMOSOME_II:739556-740906	0.169611	0.346173	0.530047	0.214326	0.662578	0	0.16729	0.305086	0	0.526873	0.172507	0.236664	0.148612
C08G5.3	CHROMOSOME_II:743105-745135	0.484336	0.444836	0.363261	0.0918041	0.0709516	0.293452	0.0955418	0.417878	0.348032	0.300691	0.295564	0	0.381937
C08G5.4	CHROMOSOME_II:745468-750171	2.82006	2.44832	4.97206	5.7442	11.037	9.18071	5.1478	8.93759	4.83653	9.53254	14.127	6.51906	6.08511
C08G5.5	CHROMOSOME_II:756200-764859	0	0.142578	34.9732	41.6433	38.4781	42.5371	26.9405	17.6627	20.8712	21.5083	42.6301	11.9894	16.1591
C08G5.6	CHROMOSOME_II:770559-772124	0.0959691	0	0.53984	0.36381	0.56235	1.45366	0	0.207868	1.03875	0.299151	0.87847	0.401727	0.252264
C08G5.7	CHROMOSOME_II:761588-765324	0	0	2.75e-07	2.94e-07	2.86e-07	3.07e-07	4.13e-07	1.04e-07	1.14e-06	5.64e-07	7.13e-07	2.11e-07	8.26e-08
C08G9.1	CHROMOSOME_IV:7658722-7664151	1.48658	1.82044	12.7106	19.1606	23.1709	30.8036	5.92357	11.4903	14.5418	11.4552	27.3966	13.6901	11.8791
C08G9.2	CHROMOSOME_IV:7664165-7672961	0.289872	0.373287	5.68111	4.91879	8.3917	7.65241	3.32196	5.51776	2.29775	5.14444	7.15995	4.44916	5.9505
C08H9.1	CHROMOSOME_II:9875119-9877949	0.0317414	0	0.119033	0.300821	0.557984	1.05774	0.0939212	0.444371	0.455505	0.295159	0.677951	0.26574	0.083435
C08H9.10	CHROMOSOME_II:9853751-9855636	0	0	0	0	0.0496172	0	0	0	0.121536	0.105004	0.103345	0	0.0890307
C08H9.11	CHROMOSOME_II:9858050-9859580	0.0388196	0	0.0727885	0	0	0	0	0	0	0.120401	0	0	0
C08H9.12	CHROMOSOME_II:9855811-9857803	0	0	0	0	0	0	0	0	0	0.114114	0.112283	0	0
C08H9.13	CHROMOSOME_II:9869396-9871113	0.0369174	0	0	0	0.0540812	0	0	0.119323	0.397517	0	0.225287	0	0.0970406
C08H9.14	CHROMOSOME_II:9870494-9872927	0	0	0	0	0.0427219	0	0	0	2.96e-07	0	0	0	0
C08H9.15	CHROMOSOME_II:9881133-9882473	2.63021	2.68411	19.0838	25.1439	36.1852	33.6043	11.8432	18.1111	10.3314	15.71	39.4288	16.7544	13.2263
C08H9.16	CHROMOSOME_II:9892729-9894313	52.9095	53.1529	25.7124	20.0798	34.1416	25.1393	36.3383	59.7824	36.8267	36.0231	30.7075	62.5759	71.6272
C08H9.2	CHROMOSOME_II:9886478-9891029	244.233	242.078	354.78	279.462	459.322	444.512	530.869	363.283	295.663	354.675	397.911	467.529	473.592
C08H9.3	CHROMOSOME_II:9882668-9886383	12.4158	13.2146	8.20238	5.51399	7.45856	9.06269	11.3406	6.53828	4.12393	5.83031	7.3092	9.01978	13.9123
C08H9.4	CHROMOSOME_II:9862371-9866345	0.210878	0.199121	0.158441	0	0	0.233231	0	0.0914145	0	0.119388	0.117455	0	0
C08H9.5	CHROMOSOME_II:9866588-9868702	0	0	0	0.0642466	0.0993075	0.102683	0	0.0365086	0	0.105081	0	0.141885	0
C08H9.6	CHROMOSOME_II:9873189-9874462	0.0477294	0.0487076	0	0	0	0	0	0.0514721	0	0	0.145633	0	0
C08H9.7	CHROMOSOME_II:9859724-9861414	0.0373676	0.0381334	0	0	0.0547407	0.113202	0	0.0201306	0	0	0	0.0782106	0
C09B7.1	CHROMOSOME_X:2673462-2682353	0.0305078	0	0.768407	1.09907	1.39138	1.84906	0.240799	0.99097	0.875789	0.75666	1.29864	0.395835	0.721964
C09B7.2	CHROMOSOME_X:2668128-2670584	17.2766	17.1151	40.3509	40.6014	57.4259	40.0952	27.3042	33.4968	27.351	24.5759	39.4591	46.0986	36.9148
C09B8.1	CHROMOSOME_X:6031433-6034475	0.0918004	0	9.63927	11.3682	21.6065	25.5854	3.01814	9.85208	11.965	10.2426	17.9266	9.35074	9.33048
C09B8.3	CHROMOSOME_X:6007167-6011275	0.0957571	0.0977196	3.68075	2.90405	5.68121	6.09187	2.07783	3.76925	2.06417	2.52647	6.13571	3.80798	2.76877
C09B8.4	CHROMOSOME_X:6018445-6019901	52.7681	61.7727	20.7419	16.4094	16.6077	4.57923	70.0725	10.5411	10.6339	6.62352	28.5117	63.5627	13.5455
C09B8.5	CHROMOSOME_X:6020830-6022458	29.8738	28.8393	6.48319	3.1458	5.87556	5.44679	6.3659	17.0006	14.7387	11.3031	6.47065	12.1578	12.2393
C09B8.6	CHROMOSOME_X:6034056-6039461	10.4343	8.50764	301.459	383.767	459.225	399.682	300.77	227.266	288.988	222.431	402.062	279.323	294.455
C09B8.7	CHROMOSOME_X:6044273-6048575	87.0766	83.2085	70.4353	66.8785	93.1895	81.8622	115.544	112.689	99.843	94.7778	94.1295	75.0789	106.823
C09B8.8	CHROMOSOME_X:6015456-6017549	0	0.154845	1.13804	2.87608	3.11194	1.83869	0.299319	0.825701	1.1003	1.90127	3.24086	1.27033	2.79196
C09B9.1	CHROMOSOME_IV:5037806-5040430	0	0	0	0.100837	0	0	0	0	0	0	0	0	0
C09B9.2	CHROMOSOME_IV:5029257-5031035	0.376755	0.384476	0	0	0	0.16305	0	0	0.193468	0	0	0	0
C09B9.3	CHROMOSOME_IV:5021179-5029070	0.165737	0.0893373	0.196975	0.165934	0.436027	0.371285	0.103614	0.0564944	0	0.0542021	0.106844	0	0.0920453
C09B9.4	CHROMOSOME_IV:5031559-5033379	0.314201	0	0	0	0.131509	0	0	0	0	0	0	0	0
C09B9.6	CHROMOSOME_IV:5055584-5056041	7.63167	3.68246	0.436369	0.0904242	0.496485	0	0.101439	0.0396637	0	0	0	0.0760752	0.590505
C09B9.7	CHROMOSOME_IV:5056964-5059843	0.0905435	0.0369596	0.0679092	0	0.0265278	0	0.0357218	0	0	0	0	0	0
C09B9.8	CHROMOSOME_IV:5040917-5045388	0.656699	0.57442	12.4893	18.1377	22.9509	27.2835	4.07135	10.0565	12.8596	9.35609	25.1898	14.5301	10.8504
C09C7.1	CHROMOSOME_X:7925388-7926541	1.50247	2.66901	14.9207	11.6024	16.3037	11.4634	26.7842	10.7493	9.00266	8.81516	26.4875	34.7078	14.6273
C09D1.1	CHROMOSOME_I:4035745-4090963	0.532536	0.546192	30.5259	39.5459	55.1949	70.1738	22.4542	32.0798	32.3421	29.5007	55.1785	32.6024	27.5989
C09D1.2	CHROMOSOME_I:4071800-4072850	0	0.1612	0.444282	0.449116	0.462807	0.717805	0.389504	0.427044	0	0.491659	1.44594	1.32246	0.830439
C09D4.1	CHROMOSOME_I:5497780-5506518	0.320504	0.340987	3.6321	4.03504	6.18582	11.4023	2.50431	4.59329	4.13891	6.0214	8.11336	6.98139	3.75276
C09D4.2	CHROMOSOME_I:5491476-5493534	5.2591	4.73958	2.56131	1.16513	2.30125	2.68983	4.51348	5.75553	1.72075	4.0353	2.08399	2.57314	5.20645
C09D4.3	CHROMOSOME_I:5488342-5490629	0.819477	0.472675	0.267227	0.270136	0.626333	0.215874	0.17571	0.652504	0	0.441901	0.108714	0.149145	0.468276
C09D4.4	CHROMOSOME_I:5479543-5484646	42.7708	33.7428	15.4382	9.89517	17.1794	17.0642	22.0583	19.5003	15.0002	16.5183	16.8298	21.7792	34.7901
C09D4.5	CHROMOSOME_I:5484769-5486357	707.475	863.02	1612.91	1641.25	1320.31	1405.38	1801.7	2026.86	2851.3	3153.99	1295.89	1205.01	989.455
C09D4.6	CHROMOSOME_I:5486489-5487153	0	0	0.187381	0	0.146396	0	0	0	0	0	0	0	0
C09D8.1	CHROMOSOME_II:10968325-11012333	44.311	41.5813	68.523	62.2082	78.1113	97.349	57.2118	71.0932	54.2025	68.432	70.8487	72.6428	100.738
C09E10.2	CHROMOSOME_X:984617-991232	2.09666	1.61626	19.5496	16.9048	24.5644	29.7551	12.0269	21.3895	13.8014	18.5507	20.1509	19.1101	21.3277
C09E7.1	CHROMOSOME_III:6532506-6533766	0.0591567	0.0603691	0	0	0	0	0.175042	0.0638595	0.212743	0.183805	0.1805	0	0.155499
C09E7.10	CHROMOSOME_III:6518660-6520003	0	0	0.193695	0	0.315851	0.625896	0.101888	0.223898	0.776257	0.322215	0.438299	0.601307	0.271537
C09E7.2	CHROMOSOME_III:6528148-6532035	3.18266	3.03699	3.87509	2.89878	4.78346	4.38256	1.87531	3.47485	3.85875	4.35967	4.03575	5.01762	3.58539
C09E7.3	CHROMOSOME_III:6524048-6525607	0	0	2.78112	7.37987	4.34562	4.49331	0.914331	1.61908	3.37115	8.15525	5.09135	6.20879	1.94939
C09E7.4	CHROMOSOME_III:6534413-6536942	19.5078	19.647	20.252	22.4083	35.5722	24.9075	38.935	25.2289	27.1921	27.0529	34.5138	35.4857	28.9949
C09E7.5	CHROMOSOME_III:6538047-6541259	0	0	0	0	0.0533525	0.110332	0.0359217	0	0	0.338803	0.111125	0	0
C09E7.6	CHROMOSOME_III:6545286-6546351	0.676087	0.689942	0.760616	1.53779	2.17891	1.22889	1.33368	2.05727	0.979092	0.845911	2.06289	3.39613	2.13258
C09E7.7	CHROMOSOME_III:6546670-6551225	7.30212	7.46782	7.83553	5.84876	10.6754	8.40835	11.7828	19.5816	6.80072	11.6386	9.07253	13.3368	19.0954
C09E7.8	CHROMOSOME_III:6553506-6558522	3.97829	3.93182	2.84845	2.28345	3.67313	4.6743	3.70059	4.57876	2.53406	2.90455	3.63354	5.18948	8.30835
C09E7.9	CHROMOSOME_III:6541554-6545120	1.7556	2.40449	2.18301	1.01581	4.142	4.25478	4.60237	3.12087	1.68867	1.88809	3.55237	4.13863	6.43639
C09E8.1	CHROMOSOME_II:556483-564123	9.33198	10.6542	18.4092	17.9832	24.8353	26.9161	21.6654	18.1745	17.862	18.8416	29.3639	20.5085	20.2883
C09E8.2	CHROMOSOME_II:553093-554785	0.0596946	0.121841	12.7422	15.6453	17.0524	23.3413	4.1862	12.7598	17.3062	16.4205	24.7366	13.2438	8.63023
C09E8.3	CHROMOSOME_II:546703-552025	22.2138	27.053	199.475	166.088	284.082	336.736	100.841	131.397	134.563	159.715	189.901	140.34	124.102
C09E9.1	CHROMOSOME_IV:1275864-1277091	78.0388	73.116	56.7645	68.0087	53.2184	56.0462	46.448	81.2313	91.9608	82.2519	61.5812	62.4242	61.0091
C09F12.1	CHROMOSOME_X:11047348-11049166	0	0	1.63794	9.93467	10.2375	15.2166	1.2924	4.02542	3.94423	0.340767	20.9901	17.8265	8.03675
C09F12.2	CHROMOSOME_X:11053877-11056904	0	0.0772695	0.0946497	0.0956795	0.406709	0.382302	0.273833	0.353143	0.0904975	0.234563	0.462065	0.528259	0.265375
C09F12.3	CHROMOSOME_X:11040965-11042791	0	0	0.410785	0.415256	0.962805	0.796424	0.0432164	0.472355	0.314723	0.271913	0.53477	0.183414	0.460697
C09F5.1	CHROMOSOME_III:658705-662731	4.34089	3.75866	95.4527	73.2538	126.719	100.262	73.9791	105.259	72.5475	107.508	104.515	97.0222	92.3207
C09F5.2	CHROMOSOME_III:647122-654460	26.9489	26.8807	19.2134	14.0776	22.4187	20.3822	15.3521	24.4386	19.5385	27.9499	25.0479	21.0037	29.4858
C09F5.3	CHROMOSOME_III:662843-666261	0.209881	0.214182	0.68869	2.78474	2.45968	4.45074	1.70783	1.24538	0	0.814669	2.88178	1.97677	1.2413
C09F9.1	CHROMOSOME_II:14698639-14699256	2.06644	2.46025	2.26023	0.97921	1.76586	1.04336	3.73664	2.06532	1.25099	3.78289	0.525431	1.4417	0.905305
C09F9.2	CHROMOSOME_II:14705440-14712525	15.0181	15.1075	131.059	107.375	139.212	136.901	171.784	124.671	74.8471	130.054	107.377	131.066	132.185
C09F9.3	CHROMOSOME_II:14720476-14733383	0.458477	0.191342	1.41437	1.81723	1.91002	3.08601	1.39789	1.21036	1.9424	1.3423	3.17949	2.0937	1.44592
C09G1.1	CHROMOSOME_X:15966040-15972229	0	0	0	0	0	0.136111	0	0.048441	0	0.139426	0	0	0
C09G1.2	CHROMOSOME_X:15977690-15982529	0.159442	0.271183	0.0249135	0.0251846	0.136249	0.0402516	0.104841	0.142856	0.0475915	0.164471	0.121624	0.222476	0.139703
C09G1.3	CHROMOSOME_X:15986091-15987523	0.118791	0	0	0	0	0	0.117165	0	0	0	0	0	0
C09G1.4	CHROMOSOME_X:15987900-15996865	7.74505	7.59178	9.6497	8.9821	12.7268	14.1242	6.58367	7.89736	7.30819	7.02443	11.6605	5.22572	7.7684
C09G1.5	CHROMOSOME_X:15959028-15962250	23.1468	31.4466	25.4049	22.7641	21.3798	24.2884	55.9755	7.23257	19.9011	5.7164	13.066	8.04815	11.2565
C09G12.1	CHROMOSOME_IV:3502135-3503909	0.408622	0.312747	9.76886	9.48788	14.3664	17.9494	13.703	17.1576	5.90032	11.4699	10.2861	15.3945	17.1856
C09G12.10	CHROMOSOME_IV:3504440-3506112	0	0	0.116311	0	0.090871	0	0.122365	0.133959	0.223136	0.220723	0	0.124142
CHROMOSOME_IV:3482891-3484703	0	0	0	0	0	0	0.0578125	0.183822	0	0	0	0	0
CHROMOSOME_IV:3480007-3481857	0	0	0.122374	0.14343	0.0859889	0	0	0	0	0	0	0	0.126197
CHROMOSOME_IV:3495292-3496437	1.9373	2.43036	1.37253	0	1.28592	0.659911	0.871674	0	1.73186	0.516843	0.85177	1.47815	0
CHROMOSOME_IV:3493606-3495176	0.108596	0.167198	0.115407	0	0	0	0.05497	0	0.218431	0	0	0	0
CHROMOSOME_IV:3491773-3493213	0	0	0.114372	0	0	0	0.0544766	0.173216	0	0	0	0	0
CHROMOSOME_IV:3479331-3479727	0	0.599256	0	0	0	0	0	0	0	0	0	0	0
CHROMOSOME_IV:3477388-3479008	0	0	0	0	0	0	0	0	0	0	0	0	0
CHROMOSOME_IV:3506285-3509526	133.906	123.157	118.318	96.0829	62.0072	80.1231	91.4777	91.3394	66.1135	75.9663	118.577	143.184	153.191
CHROMOSOME_IV:3510470-3514559	80.7635	80.0331	105.845	112.761	118.593	123.918	145.243	105.163	83.4065	101.426	120.603	131.724	149.949
CHROMOSOME_IV:8540540-8544366	35.7183	29.9934	42.6288	38.5808	57.5205	53.2864	27.1699	51.5644	46.8597	50.7808	35.8536	41.9811	40.8162
CHROMOSOME_IV:8520880-8538173	1.05736	1.22158	50.3097	67.3563	70.4807	63.7551	67.2247	100.68	73.6619	34.0198	37.3759	24.9135	15.294
CHROMOSOME_IV:8513914-8514711	719.276	764.726	352.102	342.382	418.721	303.618	705.982	313.083	385.427	554.532	445.179	338.264	414.555
CHROMOSOME_IV:8513409-8513753	115.182	133.246	44.011	89.1733	51.7169	77.687	150.27	101.754	86.3316	117.116	88.5938	115.06	60.9902
CHROMOSOME_IV:8511270-8514709	47.1683	45.7943	25.9756	18.8053	21.1224	24.5077	36.4668	21.4087	32.9945	34.5281	21.8065	25.5893	27.1448
CHROMOSOME_II:10694994-10702465	0	0.0885776	1.03938	0.78826	1.20292	2.11651	0.262096	1.29635	0.231439	0.414414	0.223586	0.679011	0.754511
CHROMOSOME_II:10702173-10714240	9.68321	10.776	6.77008	6.72884	8.71509	9.76512	7.9456	6.97223	8.5083	10.279	9.80099	10.7377	10.0782
CHROMOSOME_II:10703558-10704515	0	0	0	0	0	0	0.0608776	0	0.483811	0	0.234402	0.406777	0.329588
CHROMOSOME_II:10704843-10705961	2.3538	2.82289	4.00228	21.4178	11.3232	48.9934	1.00334	11.8039	19.3364	4.81876	38.0141	6.69736	12.915
CHROMOSOME_II:10707143-10708227	0.881766	1.21537	0	1.69452	2.25755	1.00406	0.20404	0.648772	2.83774	0.181473	0.784896	0.510786	0.0551814
CHROMOSOME_II:10708900-10712066	0.0302471	0.0310462	0.0642883	0.0376749	0.135521	0.0463645	0.0306213	0.0973645	0	0.0363127	0	0	0.0330135
CHROMOSOME_II:10714853-10716395	2.28723	2.77805	0.891248	0.28489	0.341593	0.467465	0.733249	0.490834	0.920106	0.640709	1.18624	0.643307	0.625482
CHROMOSOME_II:10717276-10729193	0.503823	0.300727	7.05835	6.52861	8.40956	7.0937	5.00681	8.3633	5.48656	5.93332	4.37435	7.1741	7.27753
CHROMOSOME_IV:8862474-8865477	57.1644	58.04	32.364	34.9096	34.4	40.6251	66.2625	39.849	33.3273	41.4442	26.121	21.6455	23.2181
CHROMOSOME_IV:8868023-8869668	107.71	104.012	54.122	31.5156	35.8651	39.5817	53.1037	35.5396	62.0039	65.2367	45.9808	42.4932	44.3712
CHROMOSOME_IV:8869948-8873044	0.109318	0.336626	2.25475	0.82156	0.806088	0.490235	0.848895	3.40754	0.643282	1.04995	0.42816	0.642453	0.646943
CHROMOSOME_IV:8874133-8876963	0.0736728	0.0504128	0.156587	0.0611765	0.110029	0	0.0745844	0.0790502	0.296371	0.0589645	0	0	0.13414
CHROMOSOME_IV:8886512-8888589	0	0.0733961	0.61043	2.615	0.854357	1.31532	0.679171	1.38108	0.771073	0.230111	4.46803	0.650533	1.88648
CHROMOSOME_IV:8888959-8890987	357.197	319.385	108.537	58.3163	67.2218	61.7209	141.637	72.5695	86.5787	140.739	98.7964	51.4349	55.1366
CHROMOSOME_IV:8877515-8879880	0.151262	0	0.160748	0.188407	0.112953	0.231862	0.153133	0	0	0	0	0	0
CHROMOSOME_IV:8881470-8882402	0	0	0	0	0	0	0	0	0	0	0	0	0
CHROMOSOME_II:11092690-11093796	0	0	0	0	0	0	0	0	0	0	0.523195	0.453972	0
CHROMOSOME_II:11094986-11096417	11.889	8.4249	8.99263	6.42935	7.45626	8.17167	8.30961	6.80966	9.19097	9.54929	9.54919	8.71433	10.0008
CHROMOSOME_II:11096508-11097148	659.773	918.962	3355.43	4889.61	2516.33	2453.7	1743.33	2509.21	1826.14	1414.99	3320.42	3691.68	3310.39
CHROMOSOME_II:11097782-11100260	230.349	203.454	146.778	125.283	136.885	135.678	135.751	134.743	167.504	169.717	180.541	207.478	178.24
CHROMOSOME_II:11100913-11102890	236.708	222.601	114.534	98.8278	72.8269	102.872	89.5289	98.4368	92.43	98.0327	129.534	86.9792	99.2131
CHROMOSOME_II:11106557-11108365	190.368	175.099	114.485	66.6698	64.8863	68.6328	120.738	59.9071	115.585	143.228	128.723	134.889	166.133
CHROMOSOME_II:11108126-11109525	95.3311	86.9011	51.1564	29.6734	33.6933	34.3376	69.1262	31.9571	52.2013	78.9755	38.7666	51.556	61.2541
CHROMOSOME_II:11109525-11111111	0	0.100188	1.55596	3.16105	2.11377	3.29165	0.494083	2.3565	2.15964	0.585915	3.99071	0.824454	1.01537
CHROMOSOME_II:11104403-11105988	0.322853	0.207114	0.0857754	0	0.0602719	0	0.163424	0.129907	0	0	0	0	0.0883087
CHROMOSOME_V:8082346-8082747	0	0	0	0	0	0	0	0	0	0	0	0	0
CHROMOSOME_V:8076064-8079894	0	0.028045	0.77992	4.19815	2.39509	15.8743	0.825526	10.3682	7.65411	1.37054	3.95554	2.01354	2.83279
CHROMOSOME_V:8065759-8067880	0	0	0	0.111825	0	0	0	0	0	0	0	0	0
CHROMOSOME_V:8068131-8069709	0	0	0.0987907	0.115789	0.0694174	0.142495	0.0941105	0.598473	0.934903	0.223204	0	0	0
CHROMOSOME_V:8070622-8072124	0	0	0.303429	0.355638	0.426422	0.291776	0.144527	1.68499	0.5743	0.342779	0	0	0.156304
CHROMOSOME_V:8080346-8081658	0	0	0.110957	0.130048	0	0	0	0.168044	0	0	0	0.176435	0
CHROMOSOME_V:8084099-8085221	0	0	0	0	0	0	0	0	0	0	0	0	0
CHROMOSOME_V:8089298-8090675	0	0	0	0	0	0.1491	0	0	0	0	0	0	0
CHROMOSOME_I:8103595-8109222	81.328	79.4164	42.9822	35.9802	51.1363	41.4591	56.298	43.7084	57.5565	64.5086	52.6854	55.9607	73.5078
CHROMOSOME_I:8109737-8119309	33.8751	30.0364	71.3899	70.4384	76.7082	69.9004	58.0741	65.2158	61.9759	72.0472	62.5378	79.2327	84.1869
CHROMOSOME_I:8125793-8130081	57.0221	53.6867	23.6947	14.9769	21.8947	21.9757	35.7462	19.4271	30.4193	36.9296	26.4058	28.9625	29.5008
CHROMOSOME_X:7415793-7418582	0.40042	0.359624	0.691492	0.249376	0.261634	0.23017	1.16545	0.241676	0.906081	0.600898	0	0.168722	0.273411
CHROMOSOME_X:7398921-7400812	0	0	1.14376	0.502709	1.30599	2.47463	0.544787	1.94875	0.811796	1.4536	0.787155	1.82135	0.811656
CHROMOSOME_X:7412449-7412704	0.672675	0	0	0	0	0	0	0	2.70604	0	0	0	0
CHROMOSOME_X:7407409-7408736	0.476093	1.87324	19.7322	27.476	35.6704	28.948	31.0879	30.1397	27.4516	25.53	17.0432	16.4015	23.9641
CHROMOSOME_X:7402084-7403567	0	0	0	0	0	0.431818	0	0	0.283314	0	0	0.23844	0
CHROMOSOME_X:7393870-7396270	2.75206	2.21946	0.574489	0.428487	0.660562	1.65728	0.870661	0.870062	0.395393	0.707989	0.668189	0.331304	0.348968
CHROMOSOME_X:7390527-7392230	0.0526629	0	0	0	0	0	0	0.16952	0	0	0	0	0
CHROMOSOME_X:7413565-7415475	1.06164	0.33529	0.867869	0.406878	0.365896	0	1.48816	0.788631	0.328522	0	0.637985	0.553574	0.269118
CHROMOSOME_X:7422627-7424836	3.43642	4.72393	11.7384	14.5225	18.2378	11.6638	19.3205	13.037	15.0583	10.7559	10.7653	14.1152	16.3478
CHROMOSOME_X:7420854-7421892	0	0	0	0	0.187158	0	0	0	0	0	0	0	0
CHROMOSOME_V:8581238-8583555	4.75757	4.55771	2.80887	1.9753	2.13161	2.59295	2.88986	1.70161	2.33918	3.68083	3.08869	3.93071	2.43205
CHROMOSOME_V:8583531-8584510	0.462113	0.711482	21.7719	26.6692	32.4374	25.9729	17.5436	32.7256	19.8292	20.1571	15.0355	15.6554	17.4203
CHROMOSOME_IV:9359423-9366489	19.2929	16.337	26.2559	24.258	29.589	35.5802	37.0812	30.3021	31.4531	36.5944	17.8806	27.7434	33.1404
CHROMOSOME_IV:9371490-9373619	0.323842	0.332397	0.206492	0.242021	0.0483653	0.0992806	0.196709	0.521219	1.30275	0.622053	0.125898	0	0.212428
CHROMOSOME_IV:9374212-9376475	5.13754	5.96958	1.69683	1.57661	1.43943	1.24277	4.35101	2.07719	3.6276	4.85677	2.41044	2.87235	3.67397
CHROMOSOME_IV:9378585-9380433	9.43421	10.6699	3.07694	1.90925	3.88811	3.282	5.17881	2.58455	4.74706	9.46398	6.38727	9.9554	8.46212
CHROMOSOME_IV:9381403-9383098	7.60815	8.97489	2.23564	2.45955	4.6742	3.12575	3.55389	4.23753	6.28217	7.20482	4.06659	7.81943	8.06867
CHROMOSOME_IV:9386190-9394905	52.5458	46.5921	41.694	32.7836	44.8128	40.094	51.264	38.5243	45.016	54.2192	33.388	40.6623	55.0216
CHROMOSOME_IV:9385106-9385602	1.39532	0	0	5.50055	4.86137	4.27763	2.19687	5.23901	8.72957	0	4.42262	0	1.24371
CHROMOSOME_IV:11425719-11447043	94.1834	88.9842	55.2794	37.9494	44.695	45.8294	63.8061	41.2903	47.1954	62.0653	47.5458	40.5076	48.0824
CHROMOSOME_IV:11459969-11463173	0.124297	0.042527	0.616433	1.54821	1.7326	2.79444	0.377505	2.00054	2.00009	1.0943	1.28971	0.699421	1.08807
CHROMOSOME_IV:11463514-11465204	0.0485223	0.0498042	0	0	0.0724674	0	0	0	0	0	0	0	0.0531302
CHROMOSOME_IV:11470162-11473395	46.8089	46.9176	18.9411	9.1851	17.1746	16.2695	23.5754	15.1418	22.008	34.8506	28.0216	25.966	25.4254
CHROMOSOME_IV:11473344-11479231	74.324	67.3749	50.7352	42.9163	67.6642	63.7258	76.6291	68.143	75.1793	66.1386	61.4884	74.2336	79.1211
CHROMOSOME_IV:11465406-11467331	5.9222	4.35668	2.25395	2.86251	3.16757	3.2538	2.23663	1.99129	1.06651	3.39499	0.690827	4.49568	1.65181
CHROMOSOME_X:16763635-16766583	0.51344	0.724631	0	0	0.0958518	0	0.259896	0	0	0	0	0	0.140761
CHROMOSOME_X:16745665-16748135	0.659096	0.330861	1.43976	1.04478	1.7005	1.97645	0.91374	1.14137	2.28971	0.773973	0.501248	1.9572	1.4354
CHROMOSOME_X:16729485-16744625	11.3659	10.0841	37.3417	45.2965	53.3014	58.4331	34.8622	54.1337	34.7837	31.6232	31.4116	30.7997	34.1579
CHROMOSOME_X:16749681-16751037	7.0761	4.03502	1.00265	2.74207	1.40907	3.37451	0.159192	1.51852	1.26515	2.26536	1.85619	2.14747	1.73997
CHROMOSOME_X:16751790-16753600	2.61488	4.62239	0.617531	0.723784	0	0.445361	0.588275	0.935248	0	0.348807	1.71284	0.495406	1.28448
CHROMOSOME_X:16767106-16770427	109.147	108.636	112.465	105.023	103.804	108.548	140.381	97.4867	103.444	113.7	70.0718	78.3063	83.2663
CHROMOSOME_V:5996339-5999329	18.3144	14.6271	7.86268	4.13111	4.16407	4.58112	5.38703	5.10343	7.33087	7.7447	8.41919	8.22609	9.25159
CHROMOSOME_V:5983727-5985494	0.0368485	0	11.278	11.4744	12.0521	9.82812	13.8399	15.6571	12.3034	8.75911	3.86951	10.197	7.81869
CHROMOSOME_V:5976011-5981496	0.0802184	0.0411689	1.1935	1.29893	1.55746	2.09038	0.243633	1.76451	0.96811	0.802542	0.778232	0.495194	0.671144
CHROMOSOME_V:5961795-5969137	14.3368	14.5178	16.8731	17.2489	23.0959	20.0119	16.9203	20.7568	21.8164	19.6267	18.5274	20.7322	15.4466
CHROMOSOME_V:5960566-5963820	24.283	30.0926	40.2239	41.3429	44.2136	38.094	38.0817	42.3945	51.5991	37.4289	58.018	72.6099	48.3117
CHROMOSOME_V:5986949-5990235	0.254216	0.0948845	12.5747	13.4718	21.434	19.3422	8.98426	19.7139	9.85475	9.93273	11.5798	15.4999	16.6355
CHROMOSOME_V:5985422-5986837	0	0	55.8572	204.448	164.633	184.509	17.8883	176.698	66.7519	66.3313	210.376	162.462	100.081
CHROMOSOME_I:6307328-6308431	1.31348	1.19838	0	0	0	0.26845	0.0590992	0	0	0.350418	0	0.394827	0.191944
CHROMOSOME_I:6305027-6306382	0.780373	0.168629	0.174593	0	0	0.125916	0	0	0	0.295852	0.320881	0	0.0902368
CHROMOSOME_I:6302475-6304265	0	0	0	0	0	0	0	0	0	0	0	0	0
CHROMOSOME_I:6300494-6302300	0	0	0	0	0	0	0	0	0	0	0	0	0
CHROMOSOME_I:6297768-6299731	0	0	0	0	0	0	0	0	0	0	0	0	0
CHROMOSOME_I:6294897-6297638	39.4247	32.4664	23.0319	25.3914	26.8232	31.4838	17.4269	31.7887	27.8679	37.0882	30.0911	37.3923	34.1153
CHROMOSOME_I:6289432-6293857	18.7946	16.0282	11.8242	10.5947	12.1581	12.6431	14.9391	9.33417	10.0227	14.1828	10.7565	7.33893	7.37425
CHROMOSOME_I:6284972-6289342	1492.56	1483.07	1287.24	1010.4	906.158	934.425	1591.57	809.043	1342.59	1318.21	1487.78	1189.52	1496.54
CHROMOSOME_I:6271982-6273770	0.276347	0.106368	0	0	0.0515899	0.2118	0.0349707	0	0.138961	0	0	0	0
CHROMOSOME_I:6274576-6275270	4.6108	3.10578	0.204166	0	0	0	0.243117	0.154605	0.193212	0.230643	0	0	0.0528316
CHROMOSOME_IV:5820358-5830189	8.33105	5.92861	50.9032	56.2087	71.7796	72.279	38.1417	59.0872	53.4436	47.7611	37.1111	64.5377	57.4224
CHROMOSOME_V:5331250-5333039	0	0	0.22027	0	0.0773887	0	0.0524587	0	0	0	0.605474	0	0.0567563
CHROMOSOME_V:5314387-5315573	0	0	0.210925	0	0	0	0	0	0	0	0	0	0
CHROMOSOME_V:5312873-5314273	0	0	0.48757	0	0.171301	0	0	0	0	0	0	0	0
CHROMOSOME_V:5311918-5312300	0.322054	0	0.684506	0	0.480983	0	0	0	0	0	0	0	0
CHROMOSOME_V:5303670-5311230	0.893373	0.372346	66.207	76.367	82.3648	99.0776	40.5282	83.3728	58.9582	40.5141	43.3966	52.0729	46.4339
CHROMOSOME_V:5315496-5319561	3.30486	2.71373	67.8343	84.681	105.837	94.0805	84.2172	77.2032	54.1288	58.4937	70.2138	90.429	76.5
CHROMOSOME_V:5323187-5324600	0	0	1.73793	2.03696	3.25651	3.76015	0.482881	2.41274	0.548227	1.30887	1.86071	1.15323	1.27078
CHROMOSOME_V:5324781-5328454	2.86328	1.09593	68.7877	74.562	100.772	79.3391	45.7612	80.0929	95.7463	86.207	73.0227	84.9175	103.244
CHROMOSOME_I:4747627-4759602	20.6567	19.6302	46.9706	40.9374	56.3482	51.2913	25.9861	37.0046	38.2287	45.2419	35.1507	51.1337	60.2024
CHROMOSOME_I:4759817-4761324	10.9548	8.59431	6.00632	3.9979	3.75153	3.10174	4.48559	3.3691	3.78938	3.4345	7.46155	4.7086	5.03594
CHROMOSOME_I:4731604-4735280	1.72359	1.4153	1.95381	0.715619	2.18803	2.20168	2.00665	0.924698	2.88903	2.48308	2.00951	2.32484	3.10808
CHROMOSOME_I:4727301-4730367	4.22753	3.62553	2.18722	1.10857	1.39152	1.10845	1.66125	1.52198	3.46844	2.33731	1.94541	1.87557	3.02414
CHROMOSOME_I:4724065-4726780	0	0	0.192112	0	0	0	0	0.0969842	0	0	0	0	0.0329319
CHROMOSOME_I:4721178-4723961	0.303671	0.654334	1.80487	2.41182	3.37662	2.698	1.28459	2.11854	0.976629	3.13245	2.35942	4.79788	3.27399
CHROMOSOME_I:4719789-4721099	0.101504	0.052093	0	0	0	0	0.0513802	0	0	0	0	0	0
CHROMOSOME_I:4735756-4737848	16.4886	14.7873	15.3988	10.7875	13.8674	11.8714	11.002	10.9906	14.0701	14.6964	11.9893	17.7132	16.22
CHROMOSOME_I:4738170-4744322	94.459	91.636	99.6442	87.7707	111.308	107.551	148.208	72.7539	98.4649	116.33	85.4111	123.416	159.797
CHROMOSOME_IV:6191274-6191538	0	0	0	0	0	0	0	0	0	0	0	0	0
CHROMOSOME_IV:6185876-6189194	0.259616	0.621774	0.643763	0.32337	0.387732	0.132651	0.175219	0	0.348128	0.727248	0	0.146112	0.710316
CHROMOSOME_IV:6154094-6154612	0.775705	0.530799	0.549571	3.22065	2.31701	3.17079	1.30884	3.3293	0	0.620841	1.02744	2.67451	1.7336
CHROMOSOME_IV:6155481-6156895	40.2072	34.214	22.7634	15.788	19.4323	15.2558	17.2275	20.3509	27.8193	21.5854	26.0973	25.3094	25.7734
CHROMOSOME_IV:6157298-6173029	0.346192	0.329691	1.19079	1.91144	2.15402	3.13745	0.403865	2.61752	1.35228	1.21966	2.14283	1.53342	1.65682
CHROMOSOME_IV:6154545-6155390	76.4397	71.9	56.2605	57.9144	66.738	50.0972	39.8408	50.9256	63.962	42.5019	53.3065	66.6804	57.0066
CHROMOSOME_I:4422032-4426177	1.2243	0.779119	7.23403	10.8577	14.5181	16.815	2.65242	9.93127	7.28917	6.11442	8.7511	8.41861	8.02484
CHROMOSOME_X:9584614-9586433	1.19582	0.521649	22.3028	31.5024	36.0312	45.9171	14.255	27.2338	25.2553	18.2324	20.9753	19.4134	20.8417
CHROMOSOME_X:9587884-9588822	0.0707833	0.254287	4.13725	7.49408	6.07854	9.00556	2.83053	6.83548	4.27121	2.88925	5.24776	4.55343	2.40781
CHROMOSOME_X:9589365-9595433	0.0274848	0	0.175252	0.205406	0.492578	0.168521	0.222599	0.265418	0.221132	0.065993	0.213602	0.185341	0.300342
CHROMOSOME_X:9610503-9616967	0.265549	0.275247	29.133	33.0435	43.0898	41.0099	11.6262	32.73	19.9683	20.0759	20.1744	20.0287	19.8964
CHROMOSOME_X:9617189-9618751	0	0	0.108132	0	0.379907	0	0.0515048	0	0	0	0	0	0
CHROMOSOME_X:9623246-9624657	0	0.0895747	0.185485	1.3044	1.04268	0.802627	0.0883489	0.561834	1.0532	0.209539	0.682135	0.591883	0.383655
CHROMOSOME_X:15157287-15158547	0	0	1.51786	1.77902	4.50324	4.37869	0.562314	5.61927	4.78807	2.85783	2.47901	0.268877	1.39428
CHROMOSOME_X:15141934-15142334	0	0	6.82782	14.9382	6.7168	8.53528	5.20348	8.96196	4.30766	1.02844	12.7103	5.1467	6.67212
CHROMOSOME_X:16332367-16335868	50.9519	45.4571	35.568	24.9646	26.6876	29.4641	41.0947	26.4286	40.1196	45.6887	39.3039	41.2662	55.792
CHROMOSOME_X:16329144-16329925	8.57485	12.7444	2.33284	0.512668	1.12696	1.05152	2.7779	1.3249	1.65576	4.94132	0.80819	1.40252	4.01521
CHROMOSOME_X:16340640-16345955	93.3929	81.4905	58.488	48.1511	41.9972	49.1962	65.2878	48.748	70.4895	80.9646	64.4786	61.0244	75.4914
CHROMOSOME_X:16354903-16359582	11.0286	10.2235	14.5106	12.077	18.0998	18.8248	12.8175	18.6628	14.7603	15.5319	13.4865	21.9063	21.0533
CHROMOSOME_X:14304862-14307697	7.36825	7.92593	9.20852	9.61821	12.633	14.0955	12.5318	10.3411	10.4336	12.8795	6.52926	12.1259	15.7521
CHROMOSOME_X:14307792-14311613	25.6737	26.761	32.0928	28.0359	38.6934	37.018	32.1865	31.1703	34.3324	31.5258	31.0558	40.3017	42.1815
CHROMOSOME_X:14313650-14326730	5.37516	4.77159	5.09889	4.09488	6.66774	4.51055	7.8755	6.35784	7.09487	8.27269	4.37268	5.76742	9.48453
CHROMOSOME_X:14298020-14303070	0.210636	0.270251	0.223847	0.0655905	0.314581	0.403593	0.239897	0.254261	0.105918	0.126438	0.2046	0.088765	0.172611
CHROMOSOME_X:14327547-14330125	2.50702	2.0586	11.6466	12.4907	16.4209	16.4696	10.5147	18.2152	17.8653	12.899	15.9327	23.1623	18.433
CHROMOSOME_X:14295751-14296586	103.256	89.6521	57.5645	52.5697	52.078	44.6289	86.5973	41.7743	46.3046	70.9906	58.8029	76.7259	80.0706
CHROMOSOME_X:14318062-14320328	3.89249	4.15644	32.8928	34.2514	38.6308	34.7412	21.8751	38.5906	32.0751	27.5108	29.1641	42.7757	33.8008
CHROMOSOME_I:9320352-9322503	0.3944	0.309568	2.51482	5.14371	2.66796	1.99149	100.595	24.047	35.2784	1.72685	43.8855	12.0414	3.69986
CHROMOSOME_I:9327848-9330922	0.21634	0.344295	2.95595	5.0044	8.67751	9.38001	2.37436	7.16285	4.84875	4.67502	6.36705	8.58528	7.19584
CHROMOSOME_I:9335763-9342488	2.96143	2.66425	3.83703	4.93417	4.62841	8.11244	2.05445	5.81079	3.92201	3.45614	3.93452	2.88479	1.84885
CHROMOSOME_X:3499239-3505240	0.278991	0.14318	34.8559	45.9597	45.3095	52.9384	21.6884	48.7014	23.8575	24.4597	20.0098	23.6409	19.8697
CHROMOSOME_X:3496012-3499156	0.131741	0.0782367	2.64881	9.31427	10.5985	22.4576	0.514892	14.5738	5.52502	2.76409	7.41001	4.5441	3.9738
CHROMOSOME_X:3489279-3491142	0.113766	0	1.69262	3.40089	2.88843	2.09264	1.84278	1.46484	0.915317	3.00476	0	2.70749	2.13104
CHROMOSOME_X:3486295-3486825	0	0	0	0	0	0	0	0	0	0	0	0	0
CHROMOSOME_X:3505426-3506352	0.259097	0.132971	9.91252	12.909	11.0283	11.1205	2.75418	10.2168	8.85954	3.73267	9.34637	9.64404	8.87956
CHROMOSOME_V:7692071-7693469	0	0	0	0	0	0	0	0.310588	0	0	0	0	0
CHROMOSOME_V:7681800-7683938	0	0	0	0	0.0668269	0	0	0.144035	0	0	0.174162	0	0.146931
CHROMOSOME_V:7686362-7688140	1.33116	1.96912	4.74324	6.72976	7.83532	3.8409	8.44251	8.82199	8.19	9.58863	2.74153	7.1364	7.79528
CHROMOSOME_V:7676184-7676944	0	0.173032	1.43321	1.04988	1.76239	0.775222	1.79198	0.813975	0.67816	1.01192	0.329327	0	0.463061
CHROMOSOME_V:7672069-7673027	0.119602	0.122762	0.508414	0	0.357248	0.366666	0.242164	0	0	0	0	0	0
CHROMOSOME_V:7668220-7668967	0	0	0.613904	0	0.431373	0.590327	0.19494	0.619837	0.387311	0.462344	0	0.326778	0.529539
CHROMOSOME_V:7679294-7681518	1.89077	1.32322	6.08897	6.13752	7.18796	9.04617	7.45365	7.56182	7.14523	7.70404	5.12135	8.79089	8.10899
CHROMOSOME_V:7684320-7686316	1.06406	1.49666	3.43438	4.12349	5.29721	5.63341	4.94721	4.18629	12.0523	6.5291	2.14637	13.353	6.51268
CHROMOSOME_V:7688313-7689957	0	0.0500938	0	0	0	0.299241	0	0.1571	0	0	0	0	0
CHROMOSOME_V:10236132-10238836	108.991	131.165	174.162	148.938	143.437	163.865	187.955	138.163	186.132	189.524	181.903	298.244	248.121
CHROMOSOME_V:10248879-10252870	143.618	121.829	57.5612	42.7275	56.5968	57.2064	70.1687	63.2217	79.3741	89.219	75.7089	76.3673	83.3964
CHROMOSOME_V:10252796-10255032	20.6836	17.0505	17.9485	13.8324	17.7258	19.0797	15.7163	20.4025	25.4085	18.1652	18.6918	18.1681	14.9595
CHROMOSOME_V:10231681-10233389	0.0437657	0.0449219	0	0	0.0653633	0	0	0	0.176061	0	0.170331	0	0
CHROMOSOME_V:10219428-10220444	0	0	0	0	0	0	0	0	0	0	0	0	0
CHROMOSOME_V:10228025-10228379	0	0	4.17413	19.6761	28.7118	76.7807	0.433787	35.1487	15.4272	10.494	12.6831	10.5048	12.3213
CHROMOSOME_V:10228690-10229215	0	0	0.457511	3.21739	1.6074	3.29955	0.435837	1.3858	0	1.03369	0.85177	0.739074	1.19766
CHROMOSOME_V:10229785-10230108	0	0	0.846736	0.992427	1.25606	13.8417	0	6.55439	6.41046	0.743978	0	0	2.7373
CHROMOSOME_V:10231241-10231510	0	0	1.30208	7.02012	7.76384	44.6452	0	12.339	8.23824	4.70698	13.3448	0	2.50184
CHROMOSOME_V:10221010-10221391	0	0	0	0.667273	1.07462	3.65504	0	0.912947	0.253539	0.151329	0	0	0.177013
CHROMOSOME_V:10221635-10221937	0	0	0	3.35557	2.5865	11.2087	0	3.40682	7.61201	1.46311	0.878584	0	0.494144
CHROMOSOME_V:10222280-10223495	0	0	0	0	0	0	0	0	0	0	0	0	0.0669794
CHROMOSOME_V:10240547-10241163	0	0	1.5392	0	4.32683	6.66039	0	2.33111	0	5.21642	0	5.19784	6.73842
CHROMOSOME_V:10226858-10227408	0	0	0	0	0.270293	0	0	0	0	0	0	0	0
CHROMOSOME_V:10223420-10225696	0	0	0.995112	0.833094	2.29749	0.922719	0.812545	1.18415	0.80719	0.642377	1.17022	1.24103	1.60886
CHROMOSOME_V:10239620-10240160	0	0	1.31843	4.54081	3.09287	20.5386	0	6.42043	4.49175	3.0246	5.45957	0	2.63197
CHROMOSOME_V:10241758-10242693	0	0.0629858	0	0	0	0	0	0	0.246858	0	0	0.207577	0.067275
CHROMOSOME_V:10242829-10243153	0	0	0	0	0	0	0	0	0	0	0	0	0
CHROMOSOME_II:1350691-1355645	0.119232	0.214168	0.12671	0.594047	0.890354	1.82765	0.120707	0.767607	0.239823	0.357855	0.57927	0.603153	0.35838
CHROMOSOME_II:1357183-1358014	1.77744	2.52628	3.48765	15.3296	8.98611	12.5766	1.38429	11.4446	4.40024	1.31311	5.3698	4.19224	3.32214
CHROMOSOME_V:7289008-7291813	0	0	0	0	0.159797	0	0	0.0861043	0.107606	0	0.103934	0	0.0876842
CHROMOSOME_V:7273812-7274888	0	0	0.149326	0.175019	0.314781	0.123078	0	0.0646153	0	0.168691	0	0	0.231045
CHROMOSOME_V:7280856-7281954	0	0	0	0	0.151434	0.155426	0.0513256	0.163196	0	0.12173	0	0.344318	0.111593
CHROMOSOME_V:7258789-7260139	0	0	0.0870308	0	0	0.251065	0.0414539	0	0.164723	0	0	0	0.0448031
CHROMOSOME_V:7286166-7287381	0	0	0	0	0	0	0	0	0	0	0	0	0
CHROMOSOME_V:7282335-7284738	0.0383995	0	0.163231	0.382634	0.516141	1.0595	0.0388746	0.247213	0.154474	0.276599	0.298739	0.648034	0.168021
CHROMOSOME_V:7279291-7280512	0	0	0	0	0	0	0	0	0	0	0	0	0
CHROMOSOME_V:7275772-7278506	0.0271119	0	0.0576247	0	0.161965	0.207794	0.0137237	0.130909	0.218132	0.292939	0.105348	0.182819	0.118502
CHROMOSOME_V:7269712-7272769	0	0	0	0	0	0	0	0	0	0	0	0	0
CHROMOSOME_V:7266334-7268788	0	0.307808	0	0	0.0648896	0	0.151798	0	0	0	0	0.511568	0.213349
CHROMOSOME_V:7262546-7264028	0	0	0	0	0	0	0	0	0	0	0	0	0
CHROMOSOME_II:14470296-14479551	10.8438	11.0256	9.0873	6.94854	8.58326	12.2165	9.51456	7.87924	8.18659	7.41498	8.07991	6.94871	7.74912
CHROMOSOME_II:14485548-14488615	318.426	287.989	100.241	58.7797	59.9407	68.8758	121.408	67.1403	112.292	130.252	153.665	142.591	137.321
CHROMOSOME_V:2435723-2437783	0.0250729	0	0.0532909	0	0	0	0	0	0	0	0	0	0
CHROMOSOME_V:2431803-2434724	0	0	0	0	0	0	0	0	0	0	0	0	0.0282729
CHROMOSOME_V:2419079-2421582	0.281864	0.341913	0.108925	0.127666	0	0.157112	0.311293	0.082483	0.10308	0	0	0	0.0561295
CHROMOSOME_V:2423285-2426205	0.191281	0.280478	0.348477	0.0680727	0.122432	0.167547	0.442624	0	0.109927	0.131223	0.106461	0.0923751	0.0299385
CHROMOSOME_V:2426477-2428123	1.55453	1.70197	0.165202	0	0.0386944	0	0.157376	0	0	0	0.100912	0	0.0283782
CHROMOSOME_V:2421865-2422894	70.854	66.0004	26.2598	19.9193	15.1763	14.6401	24.7347	18.4106	31.4965	32.3985	26.3194	20.1948	19.0847
CHROMOSOME_III:6620213-6622156	7.91358	6.59965	4.88075	1.93618	2.79642	3.57413	4.75683	4.09397	4.83207	6.44679	8.243	9.77492	7.95869
CHROMOSOME_III:6622601-6624919	56.9853	59.7708	87.688	86.1642	114.223	87.9355	88.9447	108.389	106.685	105.354	94.5288	127.151	95.9325
CHROMOSOME_III:6632787-6652030	0.588781	0.716901	4.34501	7.07357	8.93793	12.3955	1.92949	7.71104	4.01661	4.20349	6.04076	4.89769	5.20559
CHROMOSOME_V:12514856-12515667	0.532293	0.156102	7.75787	14.0179	9.53966	10.2574	3.00233	12.4836	10.0948	8.58135	8.60915	5.66696	7.17961
CHROMOSOME_V:12523627-12525637	3.76442	3.82998	20.3535	19.3312	25.5954	21.3603	10.8145	19.7707	18.066	18.1566	12.4531	22.8363	18.6293
CHROMOSOME_V:12101749-12106488	0.283515	0.267513	0.922868	1.87193	2.21752	2.28344	0.870498	2.16472	1.00681	1.71047	1.96026	2.57409	2.63709
CHROMOSOME_V:12101266-12103267	4.57423	4.31029	7.13999	8.1639	12.3767	9.68909	12.5813	16.3969	15.2305	10.622	6.89094	10.4582	12.0393
CHROMOSOME_V:12107122-12109118	0.552239	0.495975	1.76062	2.92338	4.69082	5.39646	1.92181	5.44402	3.61002	4.39226	5.9052	7.22003	8.039
CHROMOSOME_V:12109145-12110959	9.80035	9.42726	7.52498	8.05281	10.4985	13.3708	4.31148	9.91006	11.1463	14.5377	15.5876	18.9006	17.5901
CHROMOSOME_V:12114971-12117542	1.03285	1.00844	9.95932	12.2386	14.1839	13.9786	6.4013	12.0825	10.2357	9.87461	8.58115	11.3825	9.12281
CHROMOSOME_V:12121649-12125077	0.816641	0.748407	0.30995	0.145312	0.0871172	0.268242	0.0885798	0.469418	0.469312	0.210087	0.566755	0.590122	0.191257
CHROMOSOME_V:12118972-12120795	0.0637898	0.13095	0.813487	2.06582	1.71484	2.15117	0.581211	4.10675	1.53968	1.07215	1.49245	0.863323	1.2591
CHROMOSOME_V:12117998-12118968	0	0	0	0	0	0	0	0	0.252772	0	0	0	0
CHROMOSOME_V:5012978-5015197	0	0.0728918	0.0754697	0.707641	0.848486	1.41514	0.287577	2.97177	3.14251	0.852568	0.552333	0.838695	0.582469
CHROMOSOME_V:5007213-5011713	0	0	0	0	0	0.140319	0	0.147334	0	0	0	0	0.0501037
CHROMOSOME_V:5001476-5003399	0	0.0747903	0	0	0.0544115	0	0	0	0	0	0.141692	0	0.0398461
CHROMOSOME_V:4977919-4979146	0	0	0.113067	0	0	0	0	0	0	0	0	0	0
CHROMOSOME_V:4979932-4980959	0	0	0	0	0	0	0	0	0	0	0.243527	0	0
CHROMOSOME_V:4981794-4983177	0	0	0	0	0	0	0	0	0	0	0	0	0
CHROMOSOME_V:4983734-4987183	0.218793	0.183741	0.0422755	0	0	0.0609778	0.060409	0.0640261	0.240044	0.191031	0	0.0670149	0.108597
CHROMOSOME_V:4991489-4995049	0	0.0245877	0	0	0.0715524	0.0734387	0	0	0	0	0	0	0
CHROMOSOME_V:4997007-5000553	0.486304	0.605033	0.563787	0.256975	0.440175	0.271067	0.328214	0.237182	0.355692	0.884584	0	0.695749	0.483193
CHROMOSOME_X:8893075-8898464	0.950539	1.53739	6.5201	5.20227	7.87241	8.8747	3.0327	8.57659	5.15638	6.29365	6.42779	6.15932	8.22064
CHROMOSOME_V:7223835-7225050	0.423985	0.217593	10.964	15.491	15.7248	13.819	6.07546	17.2712	5.96963	4.56531	7.16897	3.34947	4.41976
CHROMOSOME_V:7221460-7222039	41.0286	41.3254	37.4894	68.2979	25.1974	31.1516	48.1354	30.2403	26.2229	45.5735	75.6918	70.9313	86.6331
CHROMOSOME_V:7205602-7214885	65.3468	57.8012	46.5301	36.0676	48.3498	45.86	47.2452	41.9003	55.3566	62.6661	43.3555	49.1176	59.274
CHROMOSOME_V:7214998-7219022	67.0488	67.5384	53.2874	64.3704	31.5616	36.811	48.7207	34.9406	55.2587	50.0495	91.3039	90.3084	86.4324
CHROMOSOME_V:7219103-7221023	90.0055	84.7347	39.5953	26.6176	39.0895	38.0432	41.7097	32.4119	50.4154	58.1122	49.7913	45.0729	55.3353
CHROMOSOME_V:7222030-7223261	253.236	252.262	131.802	95.9048	67.0449	61.0858	121.168	58.3763	126.484	161.462	234.293	290.697	206.373
CHROMOSOME_V:11011424-11012444	0.334188	0.343017	7.6712	13.8197	19.0658	10.4502	17.1868	23.4512	17.208	10.2708	7.82108	4.29798	3.739
CHROMOSOME_V:11021042-11022855	0.172742	0	16.3383	11.6188	19.6071	20.9183	2.44831	16.6816	11.1185	6.84364	6.41304	8.78612	8.06807
CHROMOSOME_V:11027152-11030827	61.5467	62.0576	46.8419	37.6228	48.3471	55.2846	74.3445	43.4754	51.4685	54.0844	60.0072	47.8644	46.1975
CHROMOSOME_III:8622577-8625920	17.2993	22.2541	32.8467	44.7421	40.4769	43.8421	46.2152	29.328	39.8994	57.9928	33.4335	40.3921	50.3293
CHROMOSOME_III:8616697-8618359	50.4279	45.136	25.4473	13.8596	12.8292	14.6001	19.4655	14.3271	22.7391	28.6405	35.3397	44.9438	29.863
CHROMOSOME_X:2803103-2804822	0.163955	0.112191	18.3531	27.0929	34.8524	28.818	9.95904	30.4346	20.6662	18.8961	22.0374	25.126	23.2323
CHROMOSOME_X:2785592-2799243	30.1954	30.4626	43.1686	41.1952	40.5053	47.0421	32.3383	44.9454	43.4728	36.1333	36.166	34.963	32.7952
CHROMOSOME_X:2805066-2807520	0.127762	0.098353	1.56141	2.54619	1.90811	2.64385	2.55452	2.57039	2.05585	1.38045	2.98003	2.37027	1.99033
CHROMOSOME_X:2810475-2814117	0	0	1.15102	0.824427	2.33649	2.02915	0.395954	0.968451	0.847204	1.01133	0.701621	0.913186	1.64423
CHROMOSOME_X:2823281-2826819	0.0394462	0.161953	2.76673	3.93064	3.47582	4.95816	0.718816	3.1744	1.74553	1.79955	6.13827	4.92666	3.45236
CHROMOSOME_X:2807900-2809623	29.1909	33.7467	42.1895	51.745	55.1605	57.2741	64.89	62.9068	47.4661	52.235	44.0829	28.0641	39.6833
CHROMOSOME_II:10579893-10580985	26.1171	28.3611	43.6038	36.5108	47.9857	47.0901	33.3285	39.239	45.9335	37.2229	52.6886	67.1505	51.7845
CHROMOSOME_II:10604969-10605555	173.867	150.031	163.291	184.612	148.081	102.012	89.5432	120.569	106.632	99.1242	147.968	168.149	157.712
CHROMOSOME_II:10605658-10607566	234.952	206.68	131.567	131.395	94.6077	112.411	168.829	112.445	142.463	147.184	149.405	130.236	123.822
CHROMOSOME_II:10612960-10618276	0.266466	0.11396	8.67417	8.32651	14.2503	11.9447	5.23928	11.4599	6.52256	8.36866	5.22214	5.09067	7.4292
CHROMOSOME_II:10618411-10620445	0.100487	0.0343805	0.142386	0.33377	0.400202	0.308064	0.406921	0.431286	0.673732	0.402127	0.260466	0.452008	0.549354
CHROMOSOME_II:10582556-10584177	16.9208	16.8538	28.5392	28.9395	30.7474	26.5673	19.4139	27.0965	37.5589	36.4127	31.6883	58.0777	49.9835
CHROMOSOME_II:10600426-10602217	0.102246	0.524738	0.217318	0.25471	0.0763517	0	0.103511	0	0.205659	0.368251	0.398213	0	0.111984
CHROMOSOME_II:10581071-10582460	9.53333	10.6974	21.7221	24.3334	23.5497	28.7311	19.3675	24.0621	36.4311	28.6314	29.2047	44.0074	39.7832
CHROMOSOME_II:10584284-10587874	20.532	19.5504	23.373	22.6555	29.8326	31.5793	19.8466	28.7518	23.6123	30.3034	26.4935	31.5892	30.055
CHROMOSOME_II:10587982-10592594	93.7799	89.9399	42.2114	24.7214	39.0125	33.5733	48.0873	30.1035	55.0607	59.7023	45.9097	45.393	67.4763
CHROMOSOME_II:10592690-10593471	21.5953	19.9403	15.6685	16.42	14.8956	11.9648	8.16551	10.0503	16.049	17.9087	17.2857	26.1741	22.7801
CHROMOSOME_II:10593222-10594719	0.996869	1.0232	4.69875	8.52497	5.78675	5.39913	2.68611	11.398	6.68368	4.516	3.47096	4.88318	6.694
CHROMOSOME_II:10595202-10596503	0.087451	0	4.64679	4.13923	7.57519	5.63032	0.885332	9.57108	7.03597	3.14964	2.3925	4.74506	2.78735
CHROMOSOME_II:10597073-10598041	0.0760419	0	0.484867	0.189431	0.794972	0.233123	0.153966	0.489553	0.305902	0.182582	0	0	0.834839
CHROMOSOME_II:10599270-10600470	0.156072	0	228.845	409.004	325.008	283.508	97.3497	371.44	92.8287	100.05	177.549	155.652	172.639
CHROMOSOME_V:18157998-18159582	0.104409	0.16075	1.66436	3.77141	1.28644	1.44039	0.528502	2.60468	2.94011	0.376039	4.06677	1.58792	1.14364
CHROMOSOME_V:18162005-18162640	0	0	0	0	0	0	0	0	0	0	0	0	0
CHROMOSOME_V:18159624-18161311	0.378154	0.232887	0.321497	0	0	0	0	0	0	0	0	0	0
CHROMOSOME_V:18148782-18154368	0.0788183	0	0.0837617	0.0981738	0.0294285	0.302043	0.159587	0	0	0.0473121	0.153312	0	0.0431138
CHROMOSOME_V:18146370-18148721	0	0	0	0.0792067	0	0.0974754	0	0	0	0.152686	0	0.107248	0
CHROMOSOME_V:18163463-18164800	0	0	0	0	0	0	0	0	0	0	0	0	0
CHROMOSOME_V:18165265-18167203	0.521446	0.446019	0	0	0	0	0.087983	0	0	0	0	0	0
CHROMOSOME_V:18167605-18168422	0	0.289845	0	0	0	0	0	0	0	0	0	0	0
CHROMOSOME_V:18169058-18171590	0.676817	0.231566	0	0	0	0	0.228397	0	0	0.541695	0	0	0
CHROMOSOME_III:3699700-3701458	430.208	416.245	419.681	323.226	302.143	267.305	334.972	268.759	378.423	332.248	396.501	338.757	300.919
CHROMOSOME_III:3709311-3713334	33.5398	32.356	23.6112	15.7211	20.0713	17.8567	25.7944	18.9964	32.1775	29.4055	26.2982	31.0986	36.6618
CHROMOSOME_III:3724202-3724962	27.9464	31.1899	39.426	20.9768	14.034	12.3463	19.3968	8.24949	23.5646	30.767	44.5053	57.7177	42.5262
CHROMOSOME_III:3702263-3703154	15.7796	13.8827	19.8258	16.8468	9.51952	7.62574	9.04979	8.50739	13.7588	11.5717	10.3195	11.8511	13.5712
CHROMOSOME_III:3703629-3705036	9.49008	8.06978	12.0686	10.683	14.4698	10.9559	16.8835	23.6462	23.1616	15.0638	11.4313	12.4656	11.0776
CHROMOSOME_III:3705246-3706767	295.679	282.379	138.55	102.024	116.913	118.883	197.942	102.289	126.374	169.756	213.168	193.533	197.414
CHROMOSOME_III:3706865-3709204	45.3653	50.6817	33.2883	21.526	27.2508	25.7813	40.303	27.3185	39.8822	32.3256	42.1665	48.0455	37.0929
CHROMOSOME_III:3713442-3718729	16.4362	15.2143	14.7349	10.0264	12.4457	12.6651	14.9702	11.586	15.9058	16.7097	14.3173	17.7386	18.9312
CHROMOSOME_III:3719885-3723579	1.95418	1.82597	2.57802	2.18227	1.40895	2.02453	4.29781	1.69191	2.38549	1.97392	2.14427	1.9967	2.20611
CHROMOSOME_III:3718715-3719655	51.2759	53.5062	37.1741	36.7691	43.5778	33.7411	59.1656	26.9142	51.1392	56.7444	37.6716	43.101	61.032
CHROMOSOME_III:3725055-3726484	17.6085	12.7035	13.9376	8.94803	6.00587	8.61792	8.06324	5.15275	9.42363	7.31235	11.391	9.35682	10.1226
CHROMOSOME_V:19332695-19349458	0.675443	0.860345	10.3433	12.0622	11.9836	13.547	5.96472	11.6832	9.72291	8.24571	9.02722	9.91429	10.8201
CHROMOSOME_III:8138023-8139565	1.81321	0.429487	567.11	947.519	718.244	673.04	170.432	661.339	384.908	301.071	425.146	314.702	327.243
CHROMOSOME_III:8130795-8132376	985.216	869.52	945.564	1279.88	518.434	626.451	656.43	854.159	541.362	471.141	543.42	623.982	738.895
CHROMOSOME_III:8133598-8136583	48.6335	48.9023	158.113	147.071	206.534	174.452	171.466	175.738	204.403	207.719	140.102	224.673	245.258
CHROMOSOME_III:8108723-8111198	0.0882677	0	11.7255	10.7745	15.8192	14.7479	3.30631	15.3431	9.94235	5.51036	11.6804	11.4764	9.22618
CHROMOSOME_III:8101280-8104010	254.021	239.568	117.013	70.4506	81.639	88.6716	171.05	76.4762	101.395	117.081	139.551	130.267	133.969
CHROMOSOME_III:8111099-8125409	42.3403	42.7702	42.0883	37.1493	44.1493	41.8773	50.0718	32.6898	38.5294	54.6127	30.8174	43.4882	55.3936
CHROMOSOME_III:8129483-8130397	651.406	876.126	1516.48	2808.21	2648.86	2041.35	1514.1	2030.72	1511.27	1461.75	1578.84	1092.65	1053.77
CHROMOSOME_III:8139544-8144565	11.5021	11.0231	16.3935	12.7799	18.2995	17.2903	14.8451	17.171	20.447	19.8775	14.5022	20.2892	21.9348
CHROMOSOME_V:12588408-12589602	0.1572	0	0	0	0	0	0	0	0	0.251632	0	0	0
CHROMOSOME_V:12590959-12592463	5.5031	5.62975	4.57753	5.24037	8.67709	4.51786	5.41508	6.12653	5.70873	8.50644	4.69918	6.42677	4.77199
CHROMOSOME_V:12596370-12599135	57.5677	58.451	37.8256	25.2876	38.6583	35.9693	42.4656	37.5703	46.1471	49.2014	44.5334	49.4091	47.2875
CHROMOSOME_V:12592546-12596280	8.13153	10.1204	19.5222	18.1334	28.3444	27.2565	18.9322	24.2537	21.2965	26.7886	18.3861	25.7127	33.1315
CHROMOSOME_V:12600267-12607287	90.8099	73.2372	30.5572	20.3293	28.053	32.3495	39.1527	30.4489	37.1677	48.8833	31.924	25.7421	33.9676
CHROMOSOME_V:12607392-12608090	24.6643	26.7058	38.2375	30.1187	24.7016	29.0593	23.7944	25.5305	22.9567	26.2429	37.0791	34.4713	27.0257
CHROMOSOME_V:12589692-12590637	0.552471	0	5.08838	12.3866	8.80113	7.90401	0.932177	11.8559	0	2.21087	1.45303	1.26078	1.83877
CHROMOSOME_V:5663583-5665247	0.700277	0.262779	0.464123	0	0.101212	0.323182	0.129591	0.14543	0.242329	0.216957	0.234475	0.152589	0.123634
CHROMOSOME_V:5660911-5663480	8.7507	7.26382	4.1854	2.5447	2.2606	3.28262	4.01207	2.45601	3.66362	8.15607	3.8188	3.31699	3.79162
CHROMOSOME_V:5654430-5658671	2.49585	1.81564	30.0743	29.174	40.5651	35.3397	18.7893	38.0437	37.92	31.4882	24.8503	39.9394	41.1092
CHROMOSOME_V:5647547-5651027	0	0.0564219	0.934676	2.80721	3.69433	4.29729	0.445198	3.36197	1.10566	1.78181	2.24282	2.22409	1.71195
CHROMOSOME_V:5644470-5646215	0.0548661	0	0	0.136679	0	0	0.055545	0	0	0	0	0	0.0601131
CHROMOSOME_V:5658690-5660690	13.5075	11.2625	7.22349	2.76234	2.67252	3.25621	5.31342	3.31907	5.82	9.51004	7.94357	5.93325	7.44849
CHROMOSOME_V:5665222-5666447	39.4382	47.3296	43.401	56.8532	42.2568	45.212	90.7966	35.6578	38.6564	46.1453	38.5222	39.975	51.8963
CHROMOSOME_V:5669594-5676071	0.938591	1.20015	147.773	178.956	174.119	166.584	73.8987	144.174	71.5772	61.3593	68.5586	76.7659	59.9875
CHROMOSOME_V:560195-562957	0.698409	0.645174	0	0.695935	0.83445	0.428225	0.70705	0.224816	0	0.167693	1.36248	0.236442	0.15326
CHROMOSOME_V:564391-566085	0	0	0.229627	0.134568	0.161352	0.331211	0	0.173884	0	0.129703	0	0	0
CHROMOSOME_V:570571-571178	0	0	0	0	0	0	0	0	0	0	0	0	0
CHROMOSOME_V:572031-574740	0	0	0	0.149587	0	0	0	0	0	0	0	0	0
CHROMOSOME_V:563135-564383	0.511905	0.0875715	0	0.637615	1.14678	2.09247	0.431866	0.549269	2.0593	0.409707	0	0	0
CHROMOSOME_V:543469-545360	0	0	0	0	0	0	0	0	0.201006	0	0	0	0
CHROMOSOME_V:539202-541487	0	0.0394862	0	0	0	0	0	0.123833	0	0.184738	0.149644	0.129845	0
CHROMOSOME_V:536628-537419	0.115967	0.11903	5.17608	21.9556	22.5153	22.0423	2.93504	38.0759	18.6604	7.51799	12.7255	5.12654	5.75134
CHROMOSOME_V:545844-548081	0	0	0	0	0	0	0	0	0	0	0	0.0977406	0
CHROMOSOME_V:548702-550654	0	0	0.0649701	0	0	0	0	0	0	0	0	0	0
CHROMOSOME_V:551279-552979	0	0	0.15609	0.0914736	0.16452	0.112572	0	0	0	0.0881662	0.142812	0	0.040161
CHROMOSOME_V:554374-556156	0	0	0	0	0	0	0	0	0	0	0	0	0
CHROMOSOME_X:1826459-1827348	0	0.435218	0	0	0.316631	0	0.214631	0	0	0.509047	0.838658	0	0.235844
CHROMOSOME_X:1806748-1809537	0.0433139	0	0	0	0	0	0.13155	0.139426	0	0	0.168566	0	0.0474035
CHROMOSOME_X:1810679-1811530	0	0.104075	0.431024	0	0	0	0.410604	0	0.407899	0	0.396821	0	0.111593
CHROMOSOME_X:1818858-1821318	0.115152	0	0	0	0.171978	0	0	0	0	0.138244	0	0	0.0630985
CHROMOSOME_X:1823609-1825334	0	0	0.151984	0.178134	0.213589	0.43844	0.0723917	0.230179	0	0	0	0	0.235413
CHROMOSOME_X:1827731-1828481	0	0	0	0.274478	0.164555	0	0	0	0	0.529108	0	0	0
CHROMOSOME_X:1816354-1816756	0	0.435218	2.25305	6.86586	2.53305	1.29991	1.28779	2.72979	1.70574	0	3.35463	3.63848	3.77351
CHROMOSOME_X:6240918-6242690	223.505	163.899	93.7111	55.9285	39.7563	68.3596	102.483	62.8185	77.9414	90.5086	94.4392	44.9598	41.3621
CHROMOSOME_X:6208730-6213876	17.2962	17.7532	60.8933	66.1288	86.7847	79.9633	63.0883	61.4074	54.417	55.0765	45.716	56.6566	56.8042
CHROMOSOME_X:6226095-6230665	0.0332304	0.0341083	0.0706291	0.248345	0.694807	0.814999	0.134566	0.641806	0.668397	0.239366	0.904389	0.224209	0.39966
CHROMOSOME_X:6230882-6233012	0	0.125839	0.153406	0	0.215588	0.501143	0.109605	0.232333	0.493202	0.362075	0.318003	0.365336	0.0894277
CHROMOSOME_X:6233112-6235505	0.0379481	0.0517785	10.6737	12.6676	17.8271	15.3566	6.64624	18.9338	13.8135	10.9339	16.3844	18.3151	13.7334
CHROMOSOME_X:6237984-6239051	3.65379	3.22702	247.045	276.845	228.516	224.233	134.029	223.085	139.432	110.74	181.9	253.141	228.325
CHROMOSOME_X:6208125-6208528	1.10776	1.42129	4.70896	2.7596	4.96328	4.24511	3.92514	3.56586	6.68448	5.31964	0	7.6522	10.5402
CHROMOSOME_X:7954306-7956143	82.9463	87.6313	179.992	205.853	180.606	200.858	216.026	231.93	200.542	153.78	260.182	263.989	253.998
CHROMOSOME_X:7930689-7931760	0.109589	0	3.02802	1.77451	4.25541	1.17589	8.93107	6.87889	8.8171	1.44722	0.426961	1.48188	0.840478
CHROMOSOME_X:7937518-7945000	0.589826	0.115097	136.179	135.215	172.212	150.925	85.3515	144.689	146.134	130.509	123.715	195.701	172.554
CHROMOSOME_X:7956146-7958261	8.34483	11.501	22.3177	15.8543	19.2745	20.702	10.384	20.1127	20.3026	11.5933	25.1474	37.8461	28.4591
CHROMOSOME_X:7959778-7961677	74.4044	65.4041	39.6369	43.2488	41.9556	43.1348	56.7352	51.7394	43.3622	62.7566	43.6382	48.4988	43.9695
CHROMOSOME_X:10233684-10236886	2.09439	1.66243	39.351	61.3753	56.9717	70.2579	38.1507	62.945	44.0361	41.4929	44.3852	44.0962	35.3786
CHROMOSOME_X:10242266-10251295	17.0816	18.2078	95.6121	100.667	145.196	120.436	93.0817	104.261	103.303	100.387	75.3802	102.976	145.949
CHROMOSOME_X:10220579-10228076	2.6672	2.06806	27.1234	25.8094	36.1035	34.2218	11.1706	36.446	25.8062	16.8322	20.658	24.1964	23.7677
CHROMOSOME_X:10239302-10240979	0	0	0	0	0	0	0	0.148304	0	0.110622	0	0	0.0504352
CHROMOSOME_I:7385867-7387106	0	0	0.0861898	0	0	0	0.0410533	0	0	0	0	0	0.088737
CHROMOSOME_I:7384394-7388792	0.257524	0.528757	0.3649	0.85537	1.16816	1.06551	0.175892	1.10529	3.14649	0.824444	1.01893	0.883868	1.24167
CHROMOSOME_I:7389042-7395915	0.0751235	0.0771082	4.36432	5.3024	8.19029	11.1315	1.11544	7.57704	3.62649	3.84804	4.76685	4.55821	4.37719
CHROMOSOME_I:7398820-7401020	0.134412	0.0344907	1.99979	4.52032	7.32707	4.53275	0.952523	14.1698	3.64981	2.66254	2.22107	1.58711	1.65336
CHROMOSOME_I:7401671-7402753	0.128434	0.0263654	0.109191	0.191968	0.0767256	0.0787483	0.0260046	0.0826849	0	0.0616757	0	0.0868067	0.22507
CHROMOSOME_I:7403337-7404349	0.0842826	0.0288364	0.23885	0.349934	0.0839165	0.0861288	0.0284418	0.0904344	0	0.0674562	0	0.284959	0.184709
CHROMOSOME_I:7405026-7408508	0	0.0311937	0.193781	0.151416	0.72621	0.745355	0.0923004	0.880443	0.978049	0.145941	0	0.30749	0.365408
CHROMOSOME_X:12065195-12067364	0	0	0.488353	1.04936	1.54418	1.52619	0.387682	1.47922	0.462152	0.643632	1.34063	0.775504	0.879685
CHROMOSOME_X:12070674-12073795	0	0	1.60995	1.53753	1.96924	2.15017	0.710038	1.89643	1.01572	1.21249	1.19922	1.41894	1.41028
CHROMOSOME_X:12068481-12070495	0	0	0.0912138	0	0.38456	0.131566	0.130339	0.276286	0.34528	0	0.167008	0.289823	0.0469654
CHROMOSOME_X:6476775-6479048	2.0101	2.26952	3.41787	1.60238	2.88197	3.08119	1.38378	1.94113	2.26414	3.66805	2.81535	4.8857	4.44244
CHROMOSOME_X:6461946-6465396	0	0	0.124248	0.231221	0.174612	0.35843	0	0.188173	0.136049	0.14036	0.227826	0	0.19221
CHROMOSOME_X:6467246-6467525	0	0	0	0	0	0	0	0	0	0	0	0	0.58883
CHROMOSOME_X:6470328-6473711	0.0509024	0.130618	0.162285	0.0634027	0.076022	0.234079	0.33496	0.163853	0.409541	0.12222	0.197759	0	0.194646
CHROMOSOME_X:6479600-6484773	0	0.0258703	0.67687	1.41666	1.80055	2.3013	0.345427	1.46733	0.823553	0.928492	1.99495	0.996591	1.73539
CHROMOSOME_X:6497882-6499799	7.22868	5.92376	10.9036	12.6344	15.0621	12.8677	9.85586	13.1357	11.0221	12.5975	10.9055	13.9968	13.3534
CHROMOSOME_X:6499871-6504576	22.323	19.0742	26.5887	24.8452	24.3023	27.8663	23.5589	30.639	29.3067	27.1251	22.5681	31.126	28.3969
CHROMOSOME_X:6474236-6476743	0.485204	0.81818	0.589298	1.03604	0.362322	0.637499	1.26311	0.780929	1.11536	0.66572	1.07812	1.28628	1.09905
CHROMOSOME_X:6468761-6469766	0	0	0.5918	0.693626	1.45544	1.92062	0.704705	1.34442	0	1.00282	0.271586	0.942611	1.22199
CHROMOSOME_I:12202220-12203708	1.32829	1.36338	63.0985	138.976	126.863	148.837	18.8934	136.61	57.175	38.2718	115.792	89.9074	69.4958
CHROMOSOME_I:12203790-12205800	0.472189	0.915475	0.334559	0.868469	0.0783562	0.482532	0.371816	0.168884	0.280481	0.377945	0.816112	0.531966	0.459011
CHROMOSOME_I:12207085-12212197	98.052	89.8844	85.7276	77.0918	61.5249	66.973	80.3693	61.0064	64.1561	74.8348	73.6065	79.9836	76.3078
CHROMOSOME_I:12213099-12215175	59.389	60.44	33.2555	30.5952	18.7193	18.0522	18.1393	18.4131	25.7184	32.1147	65.7323	70.7239	45.9352
CHROMOSOME_X:3164512-3165646	40.7898	37.6444	32.5224	40.1343	34.0057	28.3738	30.3262	29.7368	24.2488	38.7858	30.2713	41.724	32.7028
CHROMOSOME_X:3159927-3164419	9.50368	11.3714	13.9522	11.6978	17.4255	18.024	13.415	15.1633	20.2705	17.0196	12.1099	16.1115	17.1992
CHROMOSOME_X:3146562-3147078	0.318069	0.489708	2.70414	5.15031	7.36298	9.26353	5.63507	5.6312	1.91929	5.72779	1.25175	3.80146	2.9921
CHROMOSOME_X:3151134-3152453	76.211	64.2592	342.282	375.361	276.576	296.187	205.473	326.757	290.634	207.083	360.612	384.279	301.987
CHROMOSOME_X:3167559-3170498	0.0365278	0.0749855	0.543462	0.545975	0.981965	0.783886	0.147919	0.352745	0.293888	0.263117	0.568253	0.616336	0.359555
CHROMOSOME_X:3165785-3167589	5.75701	4.34605	16.0254	15.1743	20.1914	17.5355	7.70832	20.0859	16.4357	17.0335	16.7575	20.3063	18.728
CHROMOSOME_V:12734165-12736024	0.100407	0	1.13818	3.41841	4.7486	3.89903	1.05037	4.52489	2.28886	1.76795	3.12309	2.03241	1.57356
CHROMOSOME_V:12736685-12741194	0.039932	0.12626	14.9376	15.1204	19.2331	17.1388	12.6533	15.8746	10.6825	8.48531	5.96967	9.08151	8.72086
CHROMOSOME_V:12742021-12744153	0.0394003	0.121342	2.19795	4.61921	11.9306	6.45846	2.2382	5.9238	4.75598	1.23009	0.766526	0.931163	0.646686
CHROMOSOME_V:12745182-12747447	30.6044	31.0977	26.0751	21.593	29.1436	28.1325	41.1683	23.3629	33.3667	37.5254	35.2798	42.4609	50.438
CHROMOSOME_V:12748274-12749946	2.10117	3.15612	2.61419	1.02133	3.13806	4.08491	1.76399	2.63946	1.85545	4.18371	2.59474	2.771	3.4239
CHROMOSOME_V:12750012-12751528	0.0546518	0	0.116159	0.544582	0.408108	0.670187	0.055328	0.175922	0.219853	0	0	0.18475	0.119754
CHROMOSOME_V:12744142-12745033	111.861	142.733	71.7411	87.5596	62.9089	55.5878	93.9002	84.4071	44.3262	58.9416	72.3186	54.1934	82.5812
CHROMOSOME_V:12751585-12752490	0.297716	0.203721	9.70257	30.655	33.1993	25.5559	5.82705	40.2502	5.98826	12.6288	14.7552	10.1076	7.97122
CHROMOSOME_II:6988735-6991644	0.085394	0.08765	3.90224	11.2746	14.7302	20.9435	0.950956	18.2796	3.77876	5.63851	12.1293	10.3803	6.40139
CHROMOSOME_II:6979908-6988587	1.4964	1.04161	0.475249	0.428477	0.744951	0.580034	0.36567	0.60903	1.03789	0.991164	0.0667703	0.57936	0.732299
CHROMOSOME_II:6955363-6965645	80.2246	77.9634	31.2434	24.75	31.8962	30.7298	44.3176	28.1332	35.3902	49.9183	26.3383	29.096	43.3396
CHROMOSOME_II:6965757-6967606	28.8829	28.9898	16.3064	13.1162	18.4789	14.8731	17.3995	16.9483	21.1806	25.5547	24.4287	28.1775	29.9472
CHROMOSOME_II:6967861-6970543	2.35745	2.2901	1.25266	0.943836	0.502974	0.273188	0.596655	0.430245	1.0161	1.11187	0.693645	1.42142	1.02508
CHROMOSOME_II:6970625-6972195	361.21	344.837	202.058	172.309	192.033	167.169	296.291	175.753	217.527	255.786	170.777	145.433	132.212
CHROMOSOME_II:6972669-6973850	403.175	416.221	220.023	218.268	197.532	181.591	221.283	211.702	220.486	221.87	216.204	195.635	175.121
CHROMOSOME_II:6976767-6977325	2.6151	3.55474	3.75556	3.16926	2.74448	3.2502	5.74808	1.59258	1.42163	1.86674	3.05443	4.33686	4.02147
CHROMOSOME_V:14393842-14394449	0.453632	0	0	0	0	0	0	0.730114	0	0	0	0	0
CHROMOSOME_V:14392224-14393546	0	0.120025	0	0	0	0	0	0	0	0	0	0	0
CHROMOSOME_V:14415798-14416131	2.35326	1.44925	5.29476	13.6792	14.9093	7.21441	2.38346	10.6076	9.51937	5.97966	5.72018	8.27566	6.97064
CHROMOSOME_V:14395020-14395734	0	0	0	0	0	0	0	0	0	0	0	0	0
CHROMOSOME_V:14409062-14411880	0.247518	0.406821	0.572141	0.336224	1.07154	1.45561	0.408565	0.866057	0.797206	0.538338	0.872677	0.302918	0.588986
CHROMOSOME_V:14412389-14415777	112.005	115.372	66.8737	67.942	82.5165	72.022	110.258	93.1941	77.5596	76.2539	91.0697	76.7866	82.4067
CHROMOSOME_V:14420036-14422605	101.639	92.2527	68.0156	64.526	55.3534	62.0028	66.3268	63.737	101.028	87.592	92.122	102.725	87.2361
CHROMOSOME_V:14417939-14420066	16.9148	14.4582	7.73015	5.03345	6.20772	6.19439	8.29904	4.73867	8.36047	10.4653	6.05763	8.37091	8.54906
CHROMOSOME_V:14416099-14417814	23.0613	22.2263	10.868	6.41174	7.3291	8.20621	11.0479	7.29079	12.9769	16.5621	12.6768	12.7362	11.7454
CHROMOSOME_V:14421439-14422605	153.89	144.012	83.4108	60.143	49.9947	67.1967	80.5647	56.3535	77.167	75.1444	100.948	63.2099	50.7117
CHROMOSOME_V:14422704-14423346	46.4483	48.2581	38.1008	44.581	48.0945	26.514	24.8469	27.3321	42.3822	33.5278	15.6716	33.2851	30.1587
CHROMOSOME_V:14423760-14424995	183.668	203.707	170.322	148.01	128.099	121.31	238.32	112.164	220.993	236.311	182.932	243.198	342.18
CHROMOSOME_III:9650336-9651875	0.619569	0.430796	0.127438	0.0497882	0.0596978	0	0	0.0643347	0	0	0	0	0
CHROMOSOME_III:9654267-9655775	0.401166	0.0514706	0.319745	0	0.0748919	0	0.152299	0.161418	0	0	0	0	0.164749
CHROMOSOME_X:6122279-6127506	2.8349	2.95259	9.51069	8.03147	8.75833	6.39044	7.89244	11.2726	13.3609	8.94227	5.50079	9.49918	9.87293
CHROMOSOME_X:6102845-6103397	0.258565	0	34.8977	92.5832	62.2439	54.2692	19.2345	93.8079	35.3658	33.4254	24.6586	19.2097	19.2205
CHROMOSOME_X:6118675-6120401	0.254772	0.130751	0.406126	2.53869	2.09274	1.75738	0.128962	2.66533	1.53735	0.611725	0.993446	0.646503	0.838119
CHROMOSOME_X:6115768-6118016	0.113287	0.11628	0.240784	0.564428	0.676769	0.173653	0.40141	0.182334	0.227866	0.136005	0.220723	0.19152	0.558639
CHROMOSOME_X:6101179-6105427	40.1211	38.4512	52.2542	46.3782	51.7824	50.3137	44.7548	47.2954	57.4097	56.3829	50.3112	58.5344	53.7211
CHROMOSOME_X:6093250-6097536	14.1577	14.5147	17.9076	14.5897	19.5641	20.5183	21.1396	22.5011	20.8608	15.2312	15.6294	17.6449	22.208
CHROMOSOME_X:6088979-6092089	1037.83	1201.49	1112.01	946.289	857.687	902.741	1273.07	916.335	1106.14	1088.44	823.231	947.342	838.382
CHROMOSOME_X:6106881-6109310	13.2071	17.5933	15.0135	16.4883	20.8313	15.9301	17.9542	18.5748	21.5877	22.446	14.7875	17.9901	17.6972
CHROMOSOME_X:6110759-6112881	32.6904	38.2868	27.9669	23.5131	25.7403	17.5335	32.3306	29.3113	40.1599	46.0421	32.4154	31.0584	32.2557
CHROMOSOME_X:6127418-6128291	0.354757	0.56328	345.938	532.599	467.638	514.982	155.263	602.637	294.68	188.037	238.554	257.696	191.413
CHROMOSOME_II:4247191-4255284	0.122271	0.125502	0.19491	0.304596	0.593484	0.281137	0.278515	0.590382	0.491874	0.146791	0.356449	0.309287	0.43437
CHROMOSOME_II:4231385-4234623	2.79689	2.4754	1.60184	1.04303	1.15058	1.43763	1.20381	1.40168	2.0212	2.01063	2.08373	1.58203	2.23404
CHROMOSOME_II:4238175-4244835	29.9518	29.0252	20.4228	14.1476	12.6401	12.7444	24.1805	18.84	31.2647	28.0914	23.9758	31.3375	29.8431
CHROMOSOME_II:4229588-4230812	1.91401	2.1049	2.22777	2.27051	2.79048	2.37506	2.67586	1.76032	1.09995	1.86015	1.41913	1.69312	1.14736
CHROMOSOME_II:4227048-4229171	54.9506	43.8362	26.2898	14.3603	12.479	15.3195	26.4044	12.1308	22.2909	23.8354	33.4673	16.1584	19.9509
CHROMOSOME_II:4223316-4226333	0.16276	0.0954627	0.543614	0.695071	0.55561	1.28308	0.353086	1.04784	0.46768	0.614111	0.361256	0.626918	0.939718
CHROMOSOME_II:4236503-4237752	24.7165	21.3203	15.3436	6.55168	7.93585	8.30961	10.9761	8.55224	13.6028	17.1401	14.8453	14.514	15.2878
CHROMOSOME_II:4255507-4256942	0.674327	0.692167	0.477093	0.186394	0	0.45877	0.379057	0.240852	0.300997	0	0.292073	1.01412	0.0821357
CHROMOSOME_II:4257094-4258784	0.746261	1.34046	0.396533	0	0	0	0.377747	0.600548	0.375258	0	0	0.316517	0.205165
CHROMOSOME_II:4234952-4235985	0.431012	0.47643	0.634216	1.32149	0.594194	1.72793	0.60417	1.60086	1.067	0.955284	0.775889	2.0197	0.654578
CHROMOSOME_III:6390892-6393790	20.8917	21.4012	16.1873	11.5995	17.1083	14.9697	23.8763	13.5958	20.1404	24.6972	20.0076	22.9624	24.2428
CHROMOSOME_III:6394180-6396129	80.7462	75.0606	61.831	46.5472	68.2737	53.9056	49.2913	69.1828	62.3262	56.5134	53.1922	50.8767	39.3604
CHROMOSOME_III:6389779-6390785	6.64101	7.80914	10.415	11.0827	11.5552	13.6388	11.1618	14.9433	11.4124	9.75309	14.5831	14.6171	12.303
CHROMOSOME_III:6383498-6389360	34.5399	34.9688	25.6307	19.7752	28.6489	25.1931	24.5135	24.1132	33.6365	38.523	23.5097	33.2461	52.0892
CHROMOSOME_III:6381578-6382971	141.894	160.584	104.34	75.7803	88.8546	72.6424	114.735	85.1872	155.632	131.074	172.667	173.857	138.313
CHROMOSOME_III:6380641-6381929	397.922	375.38	362.739	411.873	300.495	259.864	261.777	305.675	317.942	227.898	372.043	414.882	291.221
CHROMOSOME_III:6379395-6380621	80.3428	90.3704	126.983	118.407	104.677	95.0025	160.921	99.605	187.542	165.882	175.617	245.195	242.691
CHROMOSOME_III:6375325-6379124	43.4897	41.6042	24.7865	17.3305	26.4727	22.3305	34.4505	24.1352	32.9962	28.9071	28.8006	30.0304	40.9764
CHROMOSOME_III:6367988-6374039	56.9855	52.0372	34.1805	22.9369	33.0662	31.2115	40.1535	30.0557	52.5058	57.4772	34.333	35.3407	55.5239
CHROMOSOME_III:6374040-6374950	380.271	438.549	1063.41	1755.44	1144.93	882.323	563.344	1045.85	747.391	573.541	1113.56	1133.14	744.236
CHROMOSOME_X:3958476-3961886	1.06557	1.06886	8.6989	10.4973	10.308	10.5426	5.54087	8.41918	8.57317	7.15448	8.56491	8.26912	6.19293
CHROMOSOME_X:3961872-3966302	0.169817	0.0871464	2.97403	3.57541	4.62796	4.90936	1.36916	3.28032	1.92575	2.09792	2.18057	2.49701	2.37373
CHROMOSOME_X:3968015-3968617	0.210948	0.324782	34.5235	116.924	86.6381	105.413	27.2287	90.3117	19.9422	15.195	52.4435	31.1726	34.0248
CHROMOSOME_X:3970368-3973614	5.88227	7.44178	15.7007	15.9485	18.8368	19.2076	14.1813	15.7644	14.7482	14.3208	8.18604	16.0508	14.2009
CHROMOSOME_III:4178697-4181414	3.83836	4.17791	3.92535	2.58852	3.58182	3.0542	3.35505	4.72829	4.95607	4.77813	2.80026	4.31913	4.44967
CHROMOSOME_III:4153574-4154619	27.9023	25.3207	21.762	20.1366	20.2098	17.9892	28.1869	16.9611	45.2836	29.3284	37.1095	38.2749	29.6009
CHROMOSOME_III:4152025-4152886	305.968	255.891	363.457	405.342	255.214	284.521	339.908	329.989	194.851	162.698	255.325	239.765	234.446
CHROMOSOME_III:4147354-4151572	0.0476648	0.0978481	0	0	0.177967	0	0.120636	0	0	0.0572233	0.0925759	0	0.0260339
CHROMOSOME_III:4176651-4177552	0.20677	0.150371	0.311394	0.182486	0.109404	0	0	0	0.294642	0	0	0.248041	0.401998
CHROMOSOME_III:4177505-4178642	69.0062	73.8161	37.6389	26.0288	40.4177	26.1468	43.7392	27.2827	41.9006	39.144	71.1007	95.8592	81.9171
CHROMOSOME_III:4172307-4176135	61.5306	50.7546	34.4452	18.5729	11.8108	21.3535	27.3784	14.6505	24.4289	34.6859	37.1746	21.0808	20.2358
CHROMOSOME_III:4171238-4172154	526.174	516.023	311.888	332.179	177.62	174.438	320.451	192.182	320.809	347.762	305.104	408.664	337.257
CHROMOSOME_III:4168770-4171135	14.2341	13.6296	19.4246	19.0385	27.0129	21.2819	22.5663	27.7785	29.335	23.7022	19.9302	31.2568	20.6434
CHROMOSOME_III:4166674-4168741	153.258	148.318	87.2367	69.1379	82.1317	76.7773	124.382	66.3414	126.356	132.13	124.882	123.929	137.984
CHROMOSOME_III:4164245-4166821	52.7714	48.3777	54.7243	49.5629	46.0009	50.7199	33.1209	51.5431	48.3642	48.2818	50.1483	48.9075	50.1747
CHROMOSOME_III:4161921-4164147	36.4359	39.3708	40.4548	55.874	46.0989	41.968	41.0026	38.0387	61.8253	41.2428	80.33	135.252	104.523
CHROMOSOME_III:4155361-4157368	0.198302	0.203541	1.40493	1.64666	1.28336	0.810583	0.535348	2.34054	0.53182	0.793562	2.06248	1.5659	0.870004
CHROMOSOME_I:9727194-9728012	7.11738	8.04834	17.4351	30.9531	30.8081	17.3819	17.8304	31.4536	25.2348	24.0409	13.2436	20.9307	21.6808
CHROMOSOME_I:9722540-9726281	8.90687	10.5626	41.8168	43.0253	64.2284	54.3998	45.3466	58.1284	50.5734	37.449	42.9759	45.7914	40.8176
CHROMOSOME_I:9715312-9728099	8.45491	6.56677	14.6292	14.4349	15.7437	18.3809	11.7018	15.6006	17.9573	15.0195	11.9889	14.1575	15.1656
CHROMOSOME_I:9712813-9715223	122.557	105.091	67.1495	54.0055	73.8803	74.6014	61.4423	63.1912	94.3107	96.9747	97.6724	77.0382	113.496
CHROMOSOME_II:1894342-1894687	0	0	0	0	0	0	0	0	0	0	0	0	0
CHROMOSOME_II:1881615-1882810	0	0	0	0	0.0323965	0	0	0	0	0	0	0	0
CHROMOSOME_II:1883600-1884740	0	0	0	0	0	0	0	0	0	0	0	0	0
CHROMOSOME_II:1885443-1886484	0.0675912	0.346884	0.143661	0	0	0	0.136855	0	0	0.162291	0	0	0
CHROMOSOME_II:1887213-1889176	0	0	0	0	0.0244087	0	0	0	0	0	0	0	0
CHROMOSOME_II:1889913-1890787	0	0	0	0	0	0	0	0	0	0	0	0.249395	0
CHROMOSOME_II:1871552-1873266	0.102246	0	0	0.127355	0.0763517	0	0.0517557	0	0	0	0	0	0.111984
CHROMOSOME_II:1874280-1875111	0	0	0	0	0	0	0	0	0	0.346408	0	0	0
CHROMOSOME_II:1864736-1864889	181.67	190.613	60.0643	20.114	18.0881	0	40.8706	12.9953	16.2405	19.3868	60.2322	69.684	39.5226
CHROMOSOME_II:1860632-1861085	5.31715	17.0551	18.3646	16.5572	3.97054	4.07522	34.3162	17.1157	42.7797	27.1296	24.6258	21.3676	14.6198
CHROMOSOME_II:1875962-1877242	0	0	0	0	0	0	0	0	0	0	0	0	0
CHROMOSOME_II:1869414-1870802	0.0482434	0.049518	0.102538	0	0	0	0.0488404	0	0.582222	0	0	0	0.0528234
CHROMOSOME_II:1866390-1867899	0.313226	0.321501	0	0	0.0779663	0	0.1057	0	0.630023	0.376039	0	0.176435	0.171546
CHROMOSOME_II:1862638-1863787	16.9852	22.3327	3.38135	2.44783	2.09645	2.58207	4.02645	2.86176	2.07055	4.94334	6.92204	5.2159	5.63486
CHROMOSOME_II:1877583-1878764	0	0	0	0	0.0313748	0	0	0	0	0	0	0	0
CHROMOSOME_II:1879703-1880713	0	0	0	0	0	0	0	0	0	0	0	0	0
CHROMOSOME_II:3464153-3464683	0	0	0	0	0	0	0	0	0	0	0	0	0
CHROMOSOME_II:3453766-3454683	21.5024	18.2627	8.1767	4.62066	3.48836	5.05457	4.31195	5.08612	7.46164	10.3917	14.4723	13.2551	12.3603
CHROMOSOME_II:3452644-3453631	4.49469	2.60436	2.61941	1.76905	1.19097	2.88922	0.876485	1.86686	2.33301	3.30724	1.4146	1.47292	1.98906
CHROMOSOME_II:3451423-3452504	0.136261	0.0699205	0.144787	0.848682	1.01763	0.835531	0.20693	0.65796	0.54815	0.817997	0.531556	0.691873	0.52324
CHROMOSOME_II:3445762-3451062	5.19179	5.25719	3.17648	3.62459	1.8263	3.48627	2.10563	1.92638	2.46089	3.99676	3.97207	3.67709	2.60474
CHROMOSOME_II:3445767-3446740	24.1135	26.0288	10.5733	6.45195	7.98675	10.2943	6.27429	8.60709	21.0126	19.7083	15.516	17.0393	13.9764
CHROMOSOME_II:3440829-3442448	0	0.0527954	0.109325	0.128136	0.0768196	0.15769	0	0	0	0	0	0	0
CHROMOSOME_II:3429408-3431309	0.430812	0.568534	0.392427	0	0	0	0.124612	0	0.247582	0.147773	0	0.416378	0
CHROMOSOME_II:3458503-3459059	0.278031	0.142688	0.295469	0.346308	0	0	0	0.447487	0	0	0	0	0
CHROMOSOME_II:3431284-3436515	0.125976	0	38.748	51.6467	56.927	80.3864	9.23719	60.5375	24.977	25.7107	41.9907	36.5562	25.7782
CHROMOSOME_II:3446959-3448023	5.02415	6.26192	0.762751	2.68197	1.07193	2.75046	2.17985	1.15518	5.77462	4.30833	1.41511	0	0.994883
CHROMOSOME_II:3448208-3448762	0.417046	0	0.295469	0	1.66094	0.426182	0.422207	0.447487	0	0.333786	0	0	0.153552
CHROMOSOME_II:3442492-3443257	0	0	0	0	0	0	0	0	0	0	0	0	0
CHROMOSOME_II:3443281-3444385	15.0967	13.8301	6.89717	4.74488	6.32146	5.19045	7.85597	5.90409	10.2163	9.31608	9.90937	7.6429	7.27636
CHROMOSOME_II:3444730-3445367	10.7738	7.88076	6.58021	5.86144	2.95919	4.5558	3.38498	3.98629	10.9598	6.83887	6.31406	5.47866	3.55123
CHROMOSOME_II:3459621-3460317	0	0	0	0	0	0	0	0	0	0	0	0	0
CHROMOSOME_II:3461114-3461684	0	0	0	0	0	0	0	0	0	0	0	0	0
CHROMOSOME_II:3462569-3463208	0	0.132996	0	0	0	0	0	0	0	0	0	0	0
CHROMOSOME_II:9131665-9134477	5.3e-116	0.151889	1.28e-33	1.03e-248	3.84e-38	8.23e-72	2.44e-47	0.29864	3.04e-144	5.39e-110	1.82e-54	0.57757	0.107905
CHROMOSOME_II:9136139-9137493	0	0	2.86127	14.5322	6.70177	5.50276	2.27143	14.4446	3.61034	1.07744	9.07237	4.72321	3.57182
CHROMOSOME_II:9138057-9138369	0	0	0	0	0	3.70331	0	0	0	0	0	0	0
CHROMOSOME_X:12525274-12525714	0.533737	0.547838	7.94098	9.30732	6.37703	9.27229	7.74489	6.29964	2.86283	0.854361	11.9247	1.21729	6.31233
CHROMOSOME_X:12536944-12551608	0.367141	0.518155	0.390167	0.800275	1.61069	2.88422	0.464604	1.25568	0.553851	0.826435	1.15864	1.39201	0.852168
CHROMOSOME_X:12526590-12527217	0	0	0	0	0	0	0	0	0	0	0	0	0
CHROMOSOME_V:8259295-8261284	0	0	1.47127	4.17491	4.78822	10.499	0.627018	8.32656	5.42277	2.62432	3.68399	2.4589	2.11184
CHROMOSOME_V:8228256-8238331	0.218693	0.149647	3.25373	3.50625	5.19234	4.40091	2.95767	4.13355	3.69951	3.50065	2.34837	3.71685	5.27709
CHROMOSOME_V:8238519-8239528	0	0	0	0	0	0	0	0.201358	0	0	0	0	0
CHROMOSOME_V:8240910-8243181	0	0	2.9348	3.83974	3.88461	5.02069	1.62545	4.54812	2.19604	2.77568	1.99736	2.49132	3.79141
CHROMOSOME_V:8243611-8245234	0.037274	0.153035	0.158447	0.278564	1.16903	1.48553	0.0754703	1.07985	1.04962	0.178995	0.869855	0.88056	0.570774
CHROMOSOME_V:8248091-8250269	7.73697	5.37964	7.69176	6.83913	8.75947	8.28902	7.87481	10.9797	7.19541	12.5844	6.79795	10.5331	9.6495
CHROMOSOME_V:8256810-8257934	0	0	0	0	0.189101	0	0.0640919	0	0.254678	0	0	0	0
CHROMOSOME_V:8261369-8263546	0	0	0	0.454772	0.545287	1.11933	0	0.58764	0	0	0	0	0
CHROMOSOME_V:8264220-8264643	0	0	1.04827	1.84296	0	0	0.748957	1.5876	0	0	0.978766	0	0.275245
CHROMOSOME_X:6940437-6943572	0.0273951	0	0.0582266	0.614206	0.777369	1.09181	0.13867	0.88184	0.110205	0.131555	0.106451	0.277101	0.389166
CHROMOSOME_X:6935688-6938995	99.0243	87.9083	95.3673	87.1068	84.6947	80.7785	131.046	84.3712	96.3541	114.813	96.7228	87.5652	92.3956
CHROMOSOME_X:6943698-6956357	0.304118	0.220342	32.6828	49.4669	57.5209	69.4354	18.8038	59.861	25.765	24.1164	33.1661	26.3774	22.8816
CHROMOSOME_X:17617750-17619382	0.194341	0.199475	0.41306	1.69446	1.74147	2.38318	0.393491	0	1.95449	0.466626	1.90064	1.979	0.855183
CHROMOSOME_X:17600395-17601428	0.358883	0.498057	150.087	442.65	383.07	450.079	62.2758	430.008	161.558	109.246	219.321	151.912	125.628
CHROMOSOME_X:17601532-17609972	15.6508	20.1948	62.9883	64.4834	88.6006	77.445	67.9855	79.0371	85.9769	78.504	59.4865	71.7698	87.572
CHROMOSOME_II:3852991-3854617	0	0	0	0	0	0	0	0	0	0.0636229	0	0	0
CHROMOSOME_II:3846329-3848145	0	0	0	0	0	0.219011	0	0.344939	0	0	0	0	0
CHROMOSOME_II:3843610-3845511	0	0	0	0	0	0.152638	0	0	0	0.119546	0.193885	0	0
CHROMOSOME_II:3839863-3841274	0	0	0.105823	0	0	0	0.0504049	0	0	0	0	0	0
CHROMOSOME_II:3833251-3836017	0.0632056	0.0648754	0.0895598	0	0	0	0.0426584	0	0	0.0505871	0.0818182	0	0
CHROMOSOME_II:3841915-3843407	0	0	0	0	0	0	0	0	0	0	0	0	0
CHROMOSOME_II:3849054-3850727	0	0	0.0847969	0.397549	0	0.244621	0.0605847	0	0.240742	0.0957936	0	0	0
CHROMOSOME_V:3351562-3352770	0	0	0	0	0	0	0	0.167419	0	0	0	0	0
CHROMOSOME_V:3340175-3342742	0.124497	0.0425954	0.117605	0	0	0	0	0.089056	0	0.066428	0	0.0932828	0.0604654
CHROMOSOME_V:3345306-3346481	3.66836	3.52077	1.06321	1.54285	2.24126	1.97172	2.99029	2.30032	2.10816	3.2601	2.59676	1.60942	2.55588
CHROMOSOME_V:3353259-3353918	0.336395	0.276226	0.285995	0	0	0	0.0681115	0	0	0	0	0	0.148565
CHROMOSOME_V:3320293-3320612	0	0	0	0	0	0	0	0	0	0	0	0	0
CHROMOSOME_V:3348626-3350964	0	0.0499197	0.0516851	0	0	0.1491	0.0246183	0.078277	0.0978242	0	0	0	0
CHROMOSOME_V:3342800-3343862	0	0	0	0	0	0	0	0	0	0	0	0	0
CHROMOSOME_V:3339344-3340089	0	0	0.200495	0	0	0	0	0	0	0	0	0.320107	0
CHROMOSOME_V:3333631-3339012	0	0	0.0367837	0.0431128	0	0	0.0175206	0	0.0696204	0	0	0	0.0188932
CHROMOSOME_V:3320744-3324276	0	0	0.0664843	0	0	0.100424	0	0.052711	0	0	0	0	0
CHROMOSOME_V:3330911-3332110	0	0	0	0	0.0785644	0	0	0	0	0	0	0	0
CHROMOSOME_II:5570619-5574926	19.4117	20.7615	19.2619	17.3444	20.753	11.4424	48.1288	31.8703	48.281	20.5794	12.1746	20.7473	16.937
CHROMOSOME_II:5539058-5541799	16.7076	14.025	4.07131	2.70404	2.57472	2.87097	5.99003	2.39789	3.16792	4.44598	4.30683	2.65902	4.26232
CHROMOSOME_II:5537817-5539085	0	0	0	0.15022	0	0	0	0	0	0.144789	0	0.203976	0
CHROMOSOME_II:5544761-5547473	10.4042	16.3478	13.6852	15.8601	6.35774	2.4499	47.0015	34.6641	56.4482	5.71385	1.1432	3.70365	2.63571
CHROMOSOME_II:5567768-5568379	0.0624717	0.512977	0	0	0.0933005	0	0.379468	0	0.502623	0	0	0	0
CHROMOSOME_II:5571284-5572285	2.03492	1.52982	0.796704	0.63628	0.975542	5.03e-13	4.33393	2.29092	4.02774	2.62642	0.735663	0.954652	1.73631
CHROMOSOME_II:5544567-5547473	0.517992	2.57387	0.00027158	2.17e-07	0.226877	0.560089	4.60516	4.63324	27.2993	1.35839	0.91417	7.14e-05	0.237846
CHROMOSOME_II:5554599-5555289	0	0	0	0	0	1.68098	0.555102	0	0	0	0	0	0
CHROMOSOME_II:5566064-5566675	0.0624717	0.512977	0	0	0.0933005	0	0.379468	0	0.502623	0	0	0	0
CHROMOSOME_II:5530483-5530911	0	0.869508	0	0	0	0	0	0	0	0	0	0	0
[truncated: 3,326 more rows]

## Sheet: Strains
strain systamatic name	short name referred in paper	strain genotype	Figures	RRID of strain
N2	wild type	wild type	1,2,3,4,5,6	RRID:WB_STRAIN:N2
ERC06	rex-1 insertion	knuSi254[SNP400bprex-1, unc-119(+)] II; unc-119(ed3) III	S5-1	RRID:WB_STRAIN:ERC6
ERC61	rex-8 insertion	ersSi25[wt400bp_rex8, cb-unc-119(+)] II; unc-119(ed3) III	5,S5-1
ERC62	rex-1,rex-8 insertion	ersIs26[X:11093923-11094322[rex-8], II: 8449965); knuSi254[SNP400bprex-1, unc-119(+)] II; unc-119(ed3) III	S5-1	RRID:WB_STRAIN:ERC62
ERC63	rex-8,rex-1,rex-8 insertion	ersIs27[X:11093923-11094322[rex-8], II:8371600, II:8449968); knuSi254[SNP400bprex-1, unc-119(+)] II; unc-119(ed3) III	5,S5-1,S5-2	RRID:WB_STRAIN:ERC63
ERC08	8 rex-1 insertion	knuIs6[pSE-02(400bprex-1SNP), unc-119(+))] I; unc-119(ed3) III	S5-2	RRID:WB_STRAIN:ERC8
ERC90	super rex insertion	ersIs62[superrex(rex40,rex8,rex35)x2],II:8420106]	5
ERC69	rex-8 insertion on X	ersIs33[X:11093924-11094281[rex-8], X:14373128]	3
ERC80	rex-8 flip insertion on X	ersIs52[X:11094281-11093924[rex-8reverse], X:14373128]	3
ypT47	X-V fusion	XR-VR	2	RRID:WB_STRAIN:YPT47
JZ2005	dCas9 block + sgRNA	pySi[Pfib-1:NLS:scFv:sfGFP/unc-119(+) ] I; pySi[Pfib-1:NLS:dCas9:24xGCN4/unc-119(+) ] II; unc-119(ed3)?III; pyIs(pU6:sgRNA-X227/Punc-122:mcherry).	4,S4-1,S4-2
JZ1973	dCas9 no sgRNA	pySi[Pfib-1:NLS:scFv:sfGFP/unc-119(+) ] I; pySi[Pfib-1:NLS:dCas9:24xGCN4/unc-119(+) ] II; unc-119(ed3) III	4,S4-1,S4-2

## Sheet: Primers
Insertion Strains				Primers for HMR template
Strain Name	Technique	injected/modified strain	sgRNA	Forward	Reverse	insertion coordinate	inserted sequence
ERC06	MosSci	EG6699	NA	NA	NA	chr II: 8420088	actagtgcgcaatttaagataaaatctaaacaattatttatagacTcaattacaatgttttcaaaatttttcatttgttttttaaAgtgttcagcagtcttgtttcaaaatatcagtttttcagattttacacgcattattataccctgcatcaacaagccgcaaAgcagcagtgcgtgcgtacaaaaggagacaagcgcagggaCaactggtgggaggatggacgggaggagaaagatggagaaGatgtggctgcgggtaattgggcaggggaaagaagaatacTattttttacaaactttccattatcataatcagtgaaaaaTtggatggaaagtgtttcaaatttgaatttcttagcatgtAttaaatttcaagaacgtcatatattaaaaactg…
ERC08	Bombardment	unc-119	NA	NA	NA	chr I: 4660870-4665570	actagtgcgcaatttaagataaaatctaaacaattatttatagacTcaattacaatgttttcaaaatttttcatttgttttttaaAgtgttcagcagtcttgtttcaaaatatcagtttttcagattttacacgcattattataccctgcatcaacaagccgcaaAgcagcagtgcgtgcgtacaaaaggagacaagcgcagggaCaactggtgggaggatggacgggaggagaaagatggagaaGatgtggctgcgggtaattgggcaggggaaagaagaatacTattttttacaaactttccattatcataatcagtgaaaaaTtggatggaaagtgtttcaaatttgaatttcttagcatgtAttaaatttcaagaacgtcatatattaaaaactg…
ERC61	MosSci	EG6699	NA	NA	NA	chr II: 8420088	TCACAGGTTCCTTTCAATACGTGTTCAGTTATTCTCCGACATATGCGAACATTTTTAATTTGGTTTCAGTGCACAGTAAAACATCAAATTAAAAAAACCCCCGCTCAATTATTTTATCCACCAACATGCATAAGCTCCCTGCGCGATATAAAACGTTGAAATTCAATATTTCATTTTCTCAAAATCAATCAATACACATCCCCTGCCCTTGTGTAGTTATCCACTGCAGTGAGGTGTCCCTGCGCGAATGGTTCCCTTCGCAATGTTCAACTGGGCAATGGTTGAGCCCACTTAACTTACATGAGAAAAAATGTATCGAGTTTTAAAATACACAGAGAATGTTGTTCTGTAACTGAAAACTTGAAAAAAAGAAAAAAAACAAAAAAAGTTAGAACGGAAG
ERC62	CRISPR	ERC06	aacagtttgaaatttaggg	gatgtcattaattgaaaatgcggaacagtttgaaattta tcacaggttcctttcaatac	gtcttcacgactgaatcatcggttgctgacttctcatTTgccc cttccgttctaacttttttt	chr II: 8449965	cttccgttctaactttttttgttttttttctttttttcaagttttcagttacagaacaacattctctgtgtattttaaaactcgatacattttttctcatgtaagttaagtgggctcaaccattgcccagttgaacattgcgaagggaaccattcgcgcagggacacctcactgcagtggataactacacaagggcaggggatgtgtattgattgattttgagaaaatgaaatattgaatttcaacgttttatatcgcgcagggagcttatgcatgttggtggataaaataattgagcgggggtttttttaatttgatgttttactgtgcactgaaaccaaattaaaaatgttcgcatatgtcggagaataactgaacacgtattgaaaggaacctgtga
ERC63	CRISPR	ERC62	atatcaaaaacctcgaagg	gccaaattttaatcatagatattgatatcaaaaacctcga tcacaggttcctttcaatac	gattattttaaaacaaaacctcaattggtatgctTTacct cttccgttctaacttttttt	chr II: 8371600	cttccgttctaactttttttgttttttttctttttttcaagttttcagttacagaacaacattctctgtgtattttaaaactcgatacattttttctcatgtaagttaagtgggctcaaccattgcccagttgaacattgcgaagggaaccattcgcgcagggacacctcactgcagtggataactacacaagggcaggggatgtgtattgattgattttgagaaaatgaaatattgaatttcaacgttttatatcgcgcagggagcttatgcatgttggtggataaaataattgagcgggggtttttttaatttgatgttttactgtgcactgaaaccaaattaaaaatgttcgcatatgtcggagaataactgaacacgtattgaaaggaacctgtga
ERC69	CRISPR	N2	AGCAAAAGAAATTCACTGG	attagcactcatctcttcttattgaataaaatttcaacaaCACAGGTTCCTTTCAATACGTG	cgtcagagcaacaatgaagagcaaaagaaattcactggcAATTTTCAGTTACAGAACAACATTCTCT	chrX:14373128	CACAGGTTCCTTTCAATACGTGTTCAGTTATTCTCCGACATATGCGAACATTTTTAATTTGGTTTCAGTGCACAGTAAAACATCAAATTAAAAAAACCCCCGCTCAATTATTTTATCCACCAACATGCATAAGCTCCCTGCGCGATATAAAACGTTGAAATTCAATATTTCATTTTCTCAAAATCAATCAATACACATCCCCTGCCCTTGTGTAGTTATCCACTGCAGTGAGGTGTCCCTGCGCGAATGGTTCCCTTCGCAATGTTCAACTGGGCAATGGTTGAGCCCACTTAACTTACATGAGAAAAAATGTATCGAGTTTTAAAATACACAGAGAATGTTGTTCTGTAACTGAAAA
ERC80	CRISPR	N2	AGCAAAAGAAATTCACTGG	attagcactcatctcttcttattgaataaaatttcaacaaTTTTCAGTTACAGAACAACATTCTCT	cgtcagagcaacaatgaagagcaaaagaaattcactggcAACACAGGTTCCTTTCAATACGTG	chrX:14373128	GTGTATTTTAAAACTCGATACATTTTTTCTCATGTAAGTTAAGTGGGCTCAACCATTGCCCAGTTGAACATTGCGAAGGGAACCATTCGCGCAGGGACACCTCACTGCAGTGGATAACTACACAAGGGCAGGGGATGTGTATTGATTGATTTTGAGAAAATGAAATATTGAATTTCAACGTTTTATATCGCGCAGGGAGCTTATGCATGTTGGTGGATAAAATAATTGAGCGGGGGTTTTTTTAATTTGATGTTTTACTGTGCACTGAAACCAAATTAAAAATGTTCGCATATGTCGGAGAATAACTGAA
ERC90	CRISPR	N2	AAGTGAGTTTGCTACCATCA	GCCACTTGCTCAGAGCATTGCTTATCTCGAATGAGACCCTTGTTAAAATCATTTTTCAAACATTATATGACATTGTCGAAATGTCCTCCTGATTCGATGATGGTAGCAAACTCACTTCGTTGCATCTAGATCCTCTTCGCA	AATAAGTTTTGTCTTTTTTCTCAGTTGTGATACGGTTTTTTATTCTTTTTTGTAGTTATACAGAAGACCGTTACGAAACAGACTGATATCGAAACAAACACTGATCTTACTTGCACTTACTGACCATGATTACGCCAAGC	chr II: 8420106	CCTCTTCGCAATCCGCTTTTATTCTCCCTGTGCGATTATCGCGCAGGGGTGTTTGTTGCAGCGTGTCTTGTGTGGTCTCATCCGATCGCAAGCTAATTCTTTCGTTAAACCGATACGCGCAGGGAAAAAAAAATACCCAGCTGAATTATGATGCATAAGCTCCCTGCGCGATATAAAACGTTGAAAATCAATATTTCATTTTCTCATAATCAATCAATACACATCCCCAGGCCTTGTGTAGTTATCCACAGCAGTGAGGTGTCCCTGCGCGAATGGTTCCCTTCGCAATGTTCAACTGGGTCCATTTAGATTAAGCCATTTGTTGCCCAATGTTCCTGCGCGATGGTGTTCCTGCGTGTTATTCTATTTCTAAAGGGGCAATGTGGTTATTCACTAATT…
